# Supplementary material for: The photolysis module JVAL-14, compatible with the MESSy standard, and the JVal PreProcessor (JVPP)
Source: Copernicus journal article supplement (doi:10.5194/gmd-7-2653-2014), 2014-11-13

# Tracer comparison to test the atmospheric implications of the updated $J$ -values

R. Sander<sup>1</sup>, P. Jöckel<sup>2</sup> O. Kirner<sup>3</sup>,  
A. Kunert<sup>1,\*</sup>, J. Landgraf<sup>4</sup>, A. Pozzer<sup>1</sup>

<sup>1</sup> Air Chemistry Department, Max-Planck Institute of Chemistry, P.O. Box 3060, 55020 Mainz, Germany

<sup>2</sup> Deutsches Zentrum für Luft- und Raumfahrt (DLR), Institut für Physik der Atmosphäre, Oberpfaffenhofen, 82230 Wessling, Germany

<sup>3</sup> Steinbuch Centre for Computing, Karlsruhe Institute of Technology, P.O. Box 3640, 76021 Karlsruhe, Germany

<sup>4</sup> Netherlands Institute for Space Research (SRON), Utrecht, The Netherlands

\* now at: Biogeochemistry Department, Max-Planck Institute of Chemistry, P.O. Box 3060, 55020 Mainz, Germany

This document is part of the electronic supplement to our article “The photolysis module JVAL-13.99gmdd, compatible with the MESSy standard, and the JVal PreProcessor (JVPP)” in Geosci. Model Dev. Discuss. (2014), available at: <http://www.geosci-model-dev.net>

## Contents

|          |                               |          |
|----------|-------------------------------|----------|
| <b>1</b> | <b>Oxygen compounds</b>       | <b>3</b> |
| 1.1      | O( <sup>1</sup> D)            | 3        |
| 1.2      | O( <sup>3</sup> P)            | 4        |
| 1.3      | O <sub>3</sub>                | 5        |
| <b>2</b> | <b>Hydrogen compounds</b>     | <b>6</b> |
| 2.1      | H                             | 6        |
| 2.2      | OH                            | 7        |
| 2.3      | HO <sub>2</sub>               | 8        |
| 2.4      | H <sub>2</sub>                | 9        |
| 2.5      | H <sub>2</sub> O              | 10       |
| 2.6      | H <sub>2</sub> O <sub>2</sub> | 11       |

|          |                                                        |           |
|----------|--------------------------------------------------------|-----------|
| <b>3</b> | <b>Nitrogen compounds</b>                              | <b>12</b> |
| 3.1      | HONO . . . . .                                         | 12        |
| 3.2      | N <sub>2</sub> O . . . . .                             | 13        |
| 3.3      | NO . . . . .                                           | 14        |
| 3.4      | NO <sub>2</sub> . . . . .                              | 15        |
| 3.5      | NO <sub>x</sub> . . . . .                              | 16        |
| 3.6      | NO <sub>3</sub> . . . . .                              | 17        |
| 3.7      | N <sub>2</sub> O <sub>5</sub> . . . . .                | 18        |
| 3.8      | HNO <sub>3</sub> . . . . .                             | 19        |
| 3.9      | HNO <sub>4</sub> . . . . .                             | 20        |
| <b>4</b> | <b>Carbon compounds</b>                                | <b>21</b> |
| 4.1      | CH <sub>4</sub> . . . . .                              | 21        |
| 4.2      | CH <sub>3</sub> OH . . . . .                           | 22        |
| 4.3      | CH <sub>3</sub> O <sub>2</sub> . . . . .               | 23        |
| 4.4      | CH <sub>3</sub> OOH . . . . .                          | 24        |
| 4.5      | CO <sub>2</sub> . . . . .                              | 25        |
| 4.6      | HCHO . . . . .                                         | 26        |
| 4.7      | CO . . . . .                                           | 27        |
| 4.8      | C <sub>2</sub> H <sub>6</sub> . . . . .                | 28        |
| 4.9      | C <sub>2</sub> H <sub>5</sub> O <sub>2</sub> . . . . . | 29        |
| 4.10     | PAN . . . . .                                          | 30        |
| <b>5</b> | <b>Chlorine compounds</b>                              | <b>31</b> |
| 5.1      | Cl <sub>2</sub> . . . . .                              | 31        |
| 5.2      | ClO . . . . .                                          | 32        |
| 5.3      | Cl <sub>2</sub> O <sub>2</sub> . . . . .               | 33        |
| 5.4      | HCl . . . . .                                          | 34        |
| 5.5      | HOCl . . . . .                                         | 35        |
| 5.6      | OCIO . . . . .                                         | 36        |
| 5.7      | ClNO <sub>3</sub> . . . . .                            | 37        |
| 5.8      | ClO <sub>x</sub> . . . . .                             | 38        |
| 5.9      | CFCl <sub>3</sub> . . . . .                            | 39        |
| 5.10     | CF <sub>2</sub> Cl <sub>2</sub> . . . . .              | 40        |
| 5.11     | CCl <sub>4</sub> . . . . .                             | 41        |
| 5.12     | CH <sub>3</sub> CCl <sub>3</sub> . . . . .             | 42        |
| 5.13     | CH <sub>3</sub> Cl . . . . .                           | 43        |
| <b>6</b> | <b>Bromine compounds</b>                               | <b>44</b> |
| 6.1      | Br <sub>2</sub> . . . . .                              | 44        |
| 6.2      | BrO . . . . .                                          | 45        |
| 6.3      | HOBr . . . . .                                         | 46        |
| 6.4      | HBr . . . . .                                          | 47        |
| 6.5      | BrNO <sub>3</sub> . . . . .                            | 48        |
| 6.6      | BrCl . . . . .                                         | 49        |
| 6.7      | BrO <sub>x</sub> . . . . .                             | 50        |
| 6.8      | CF <sub>2</sub> ClBr . . . . .                         | 51        |
| 6.9      | CF <sub>3</sub> Br . . . . .                           | 52        |
| 6.10     | CH <sub>3</sub> Br . . . . .                           | 53        |

# 1 Oxygen compounds

## 1.1 O(<sup>1</sup>D)

— January —

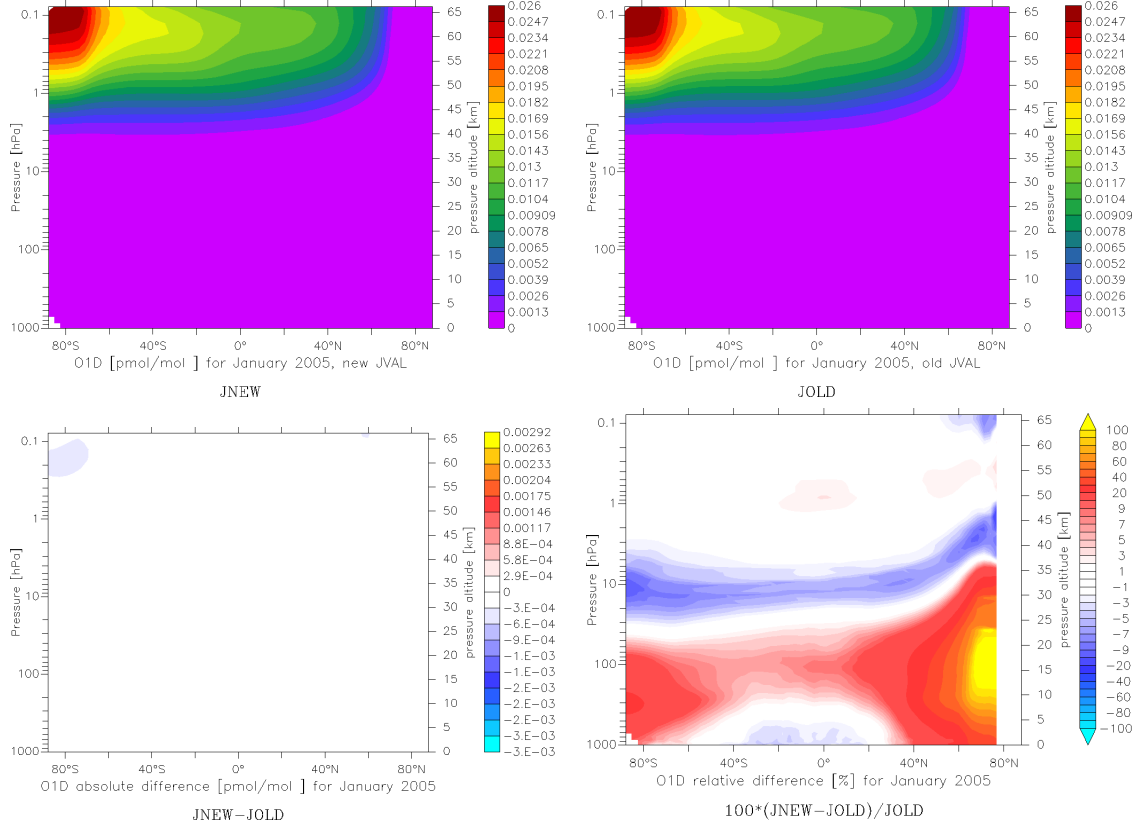

— July —

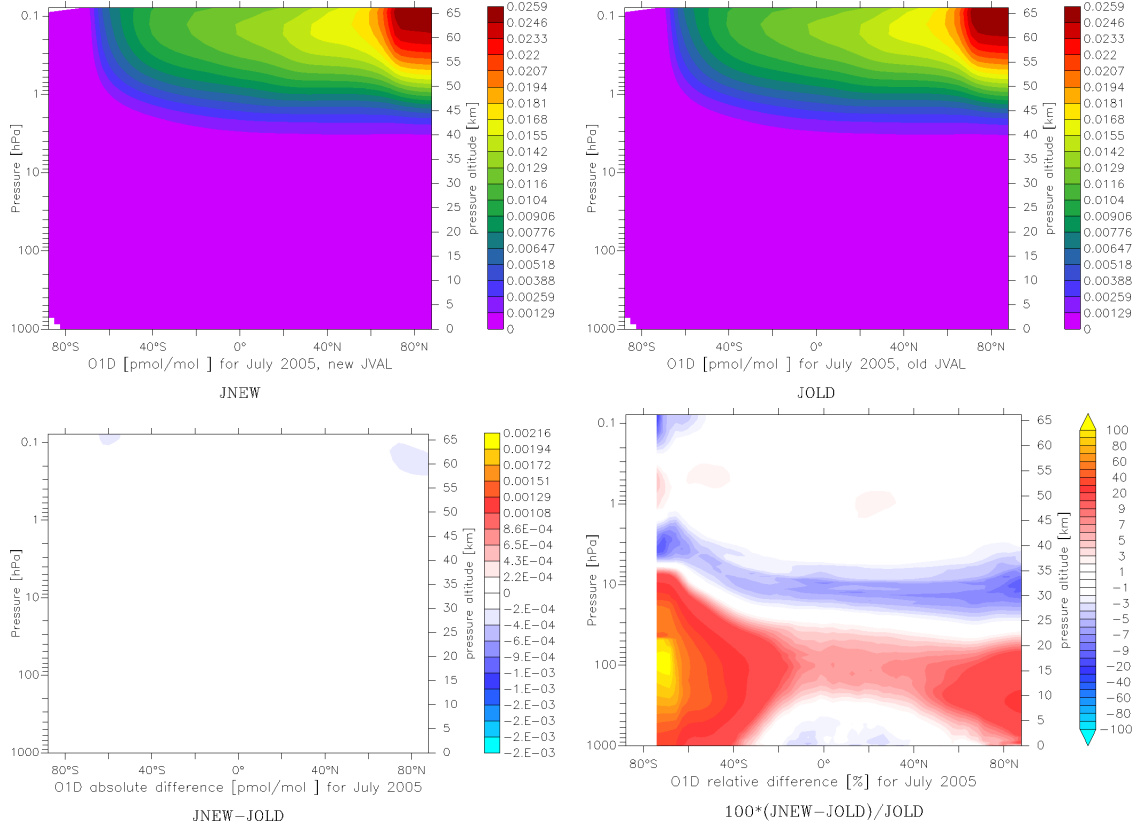

## 1.2 O(<sup>3</sup>P)

— January —

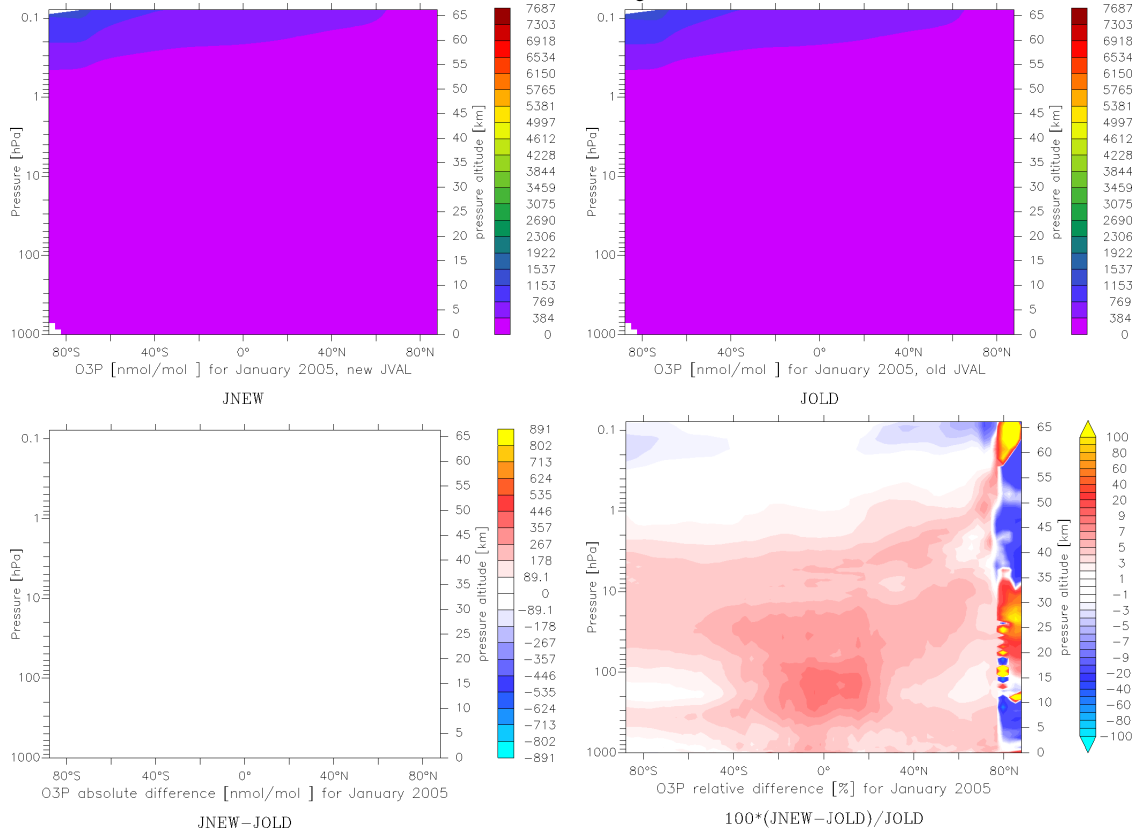

— July —

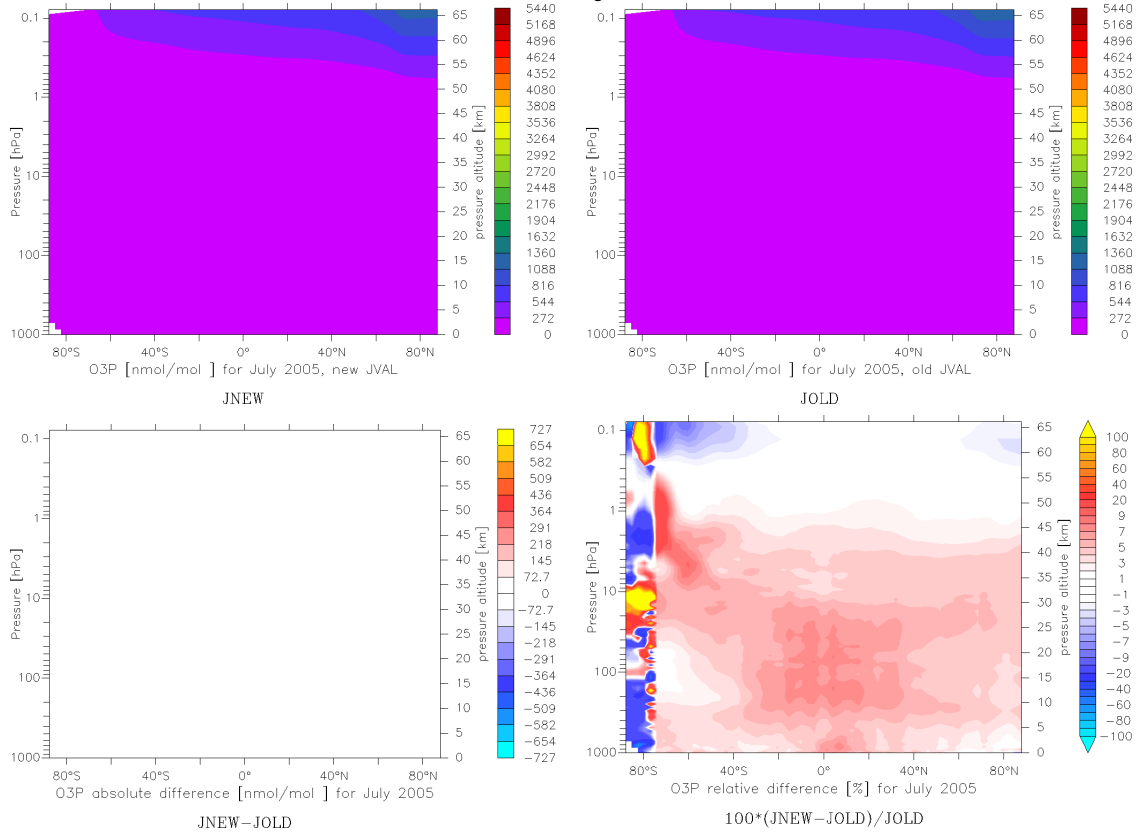

## 1.3 O<sub>3</sub>

— January —

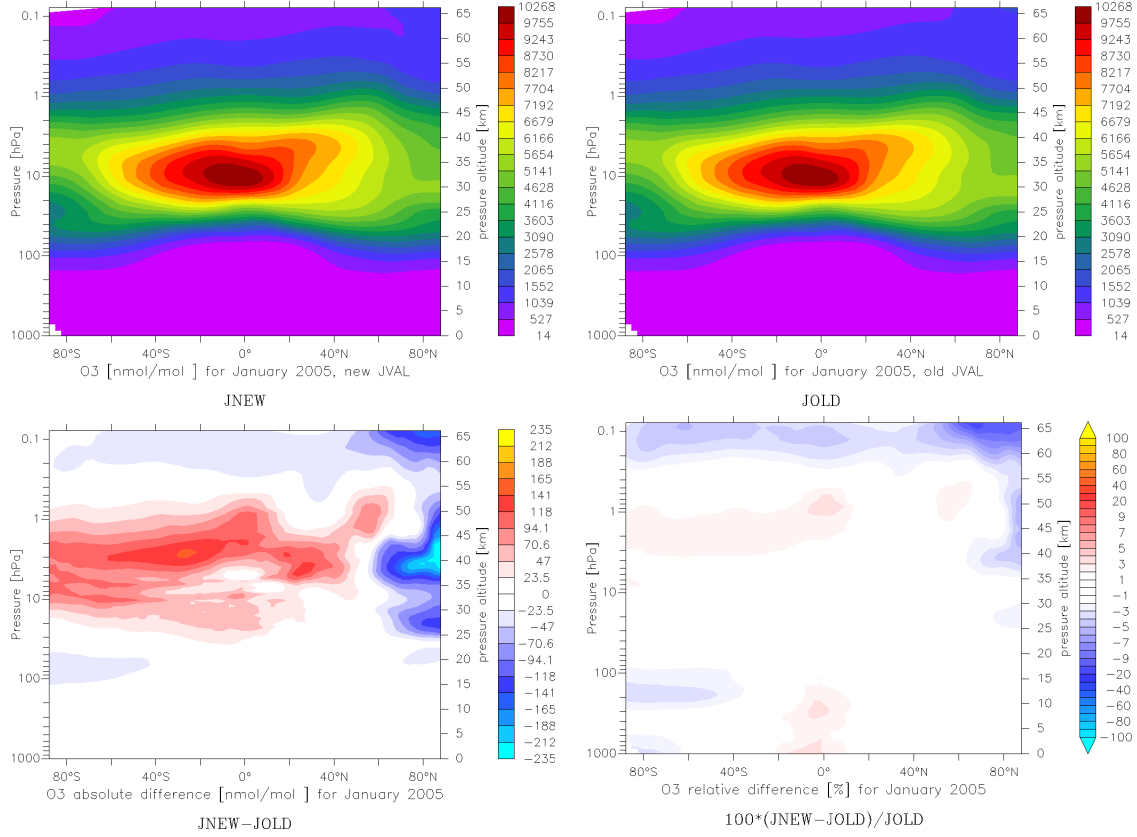

— July —

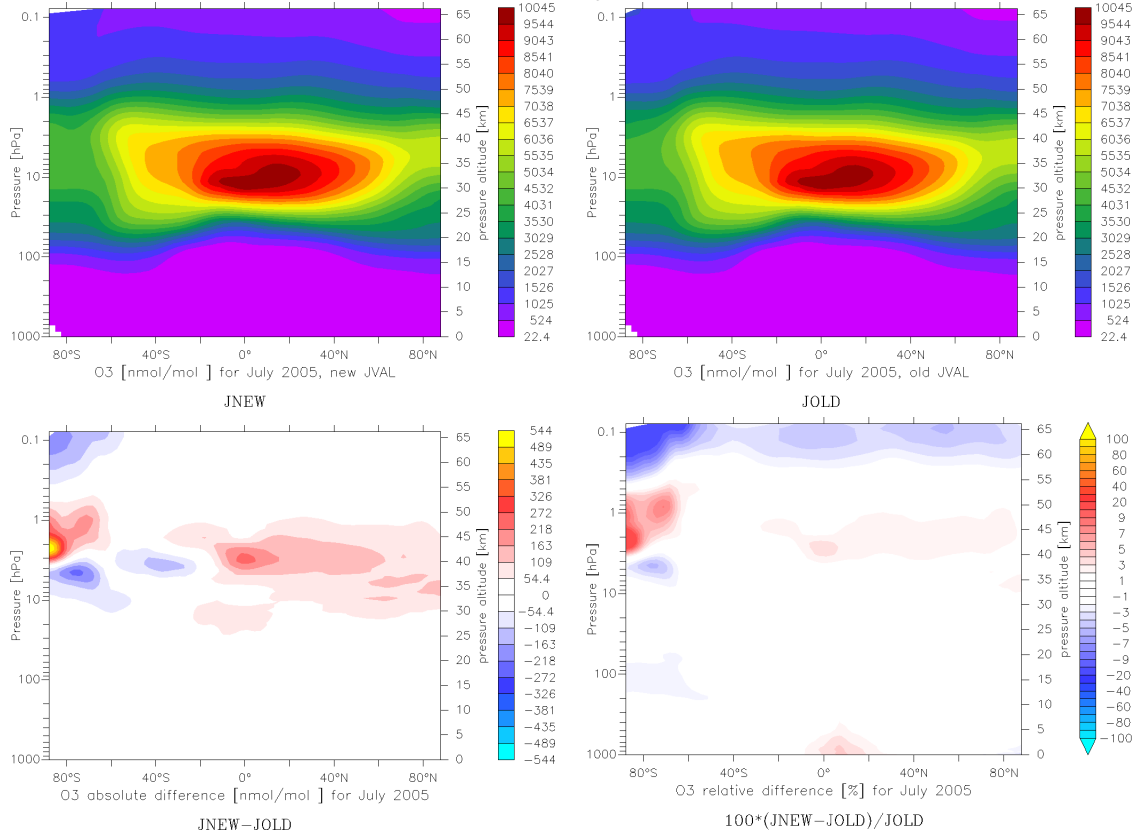

## 2 Hydrogen compounds

### 2.1 H

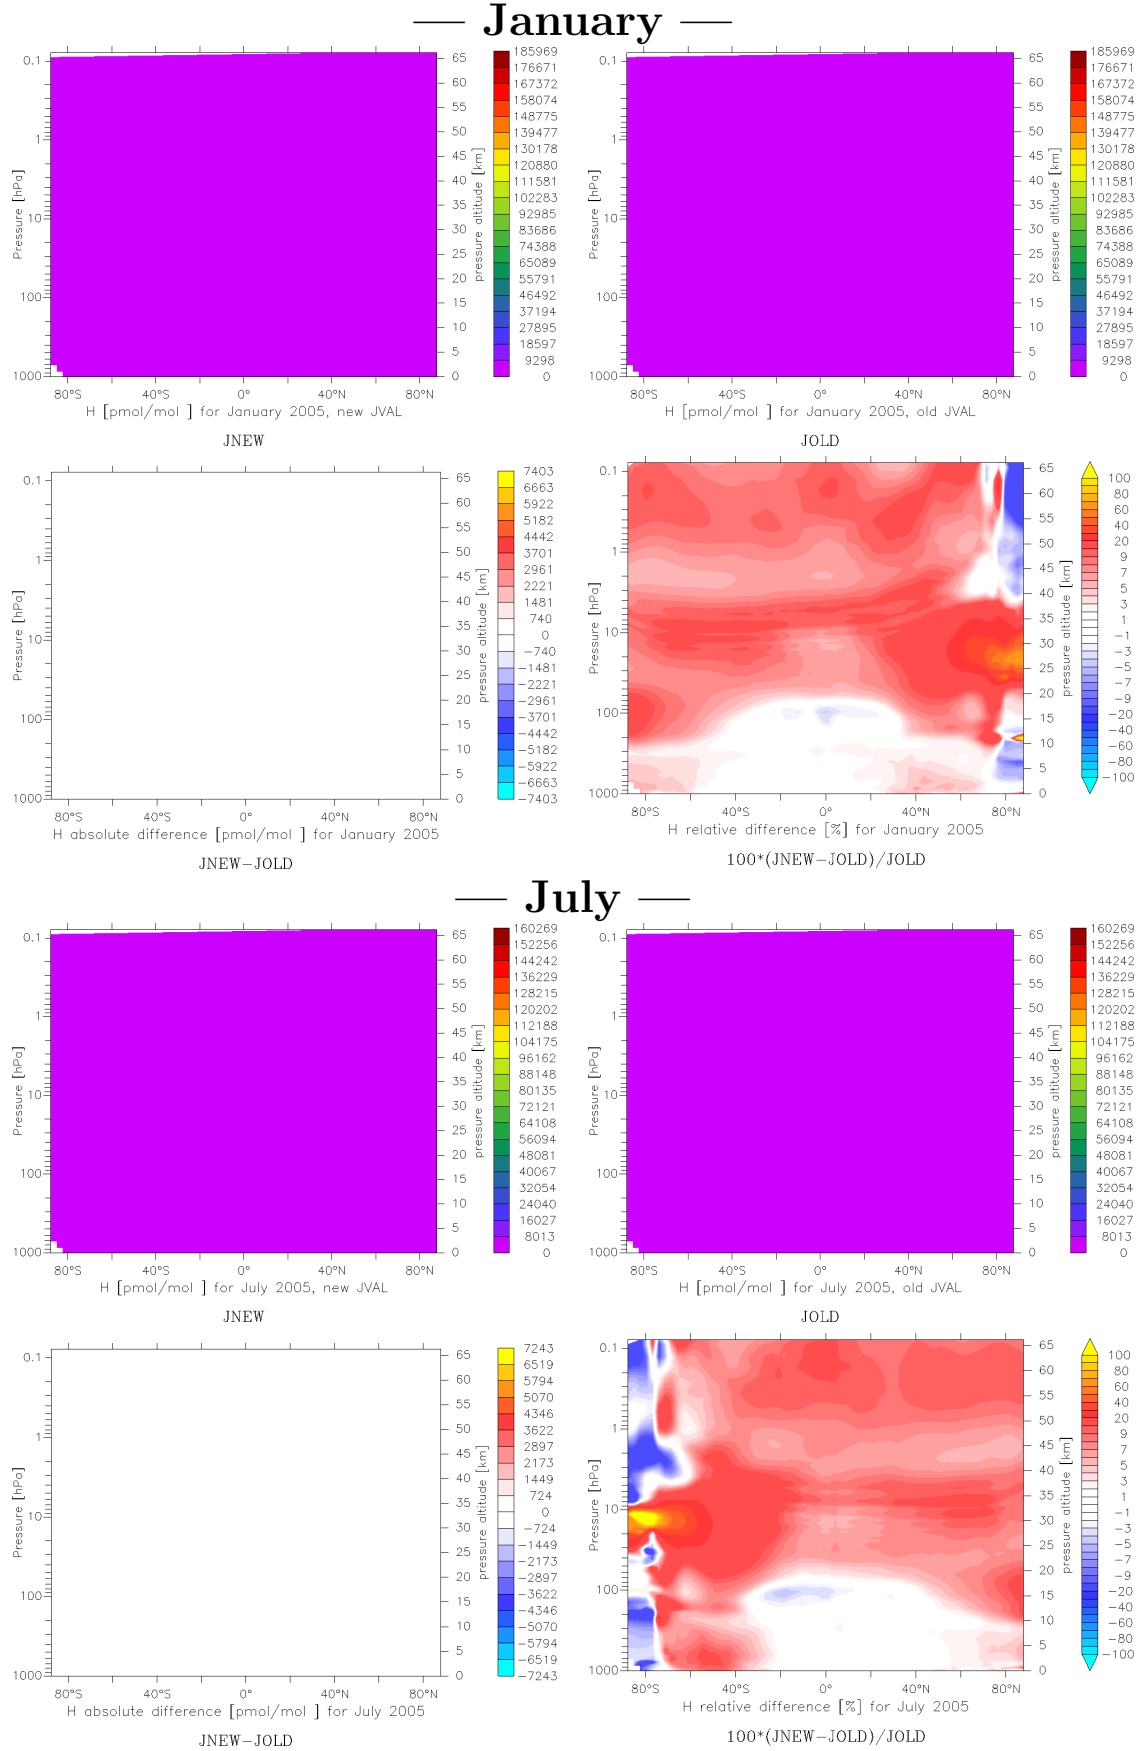

## 2.2 OH

— January —

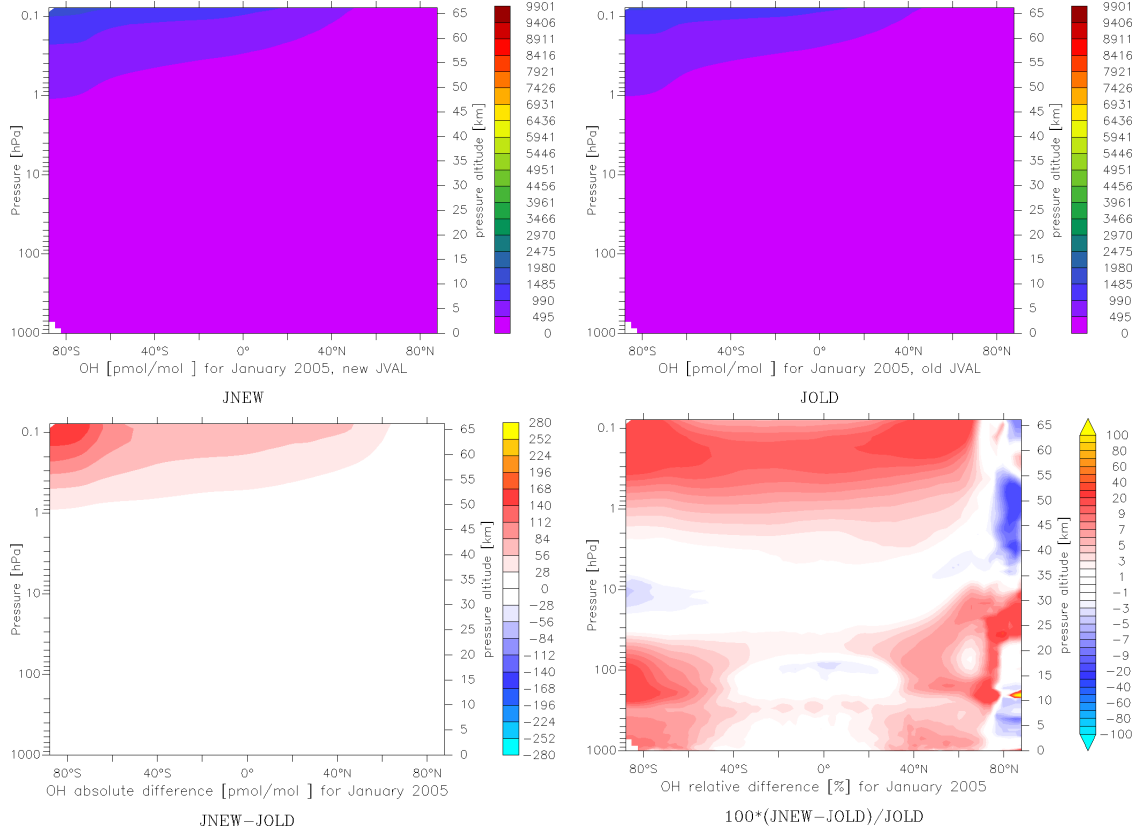

— July —

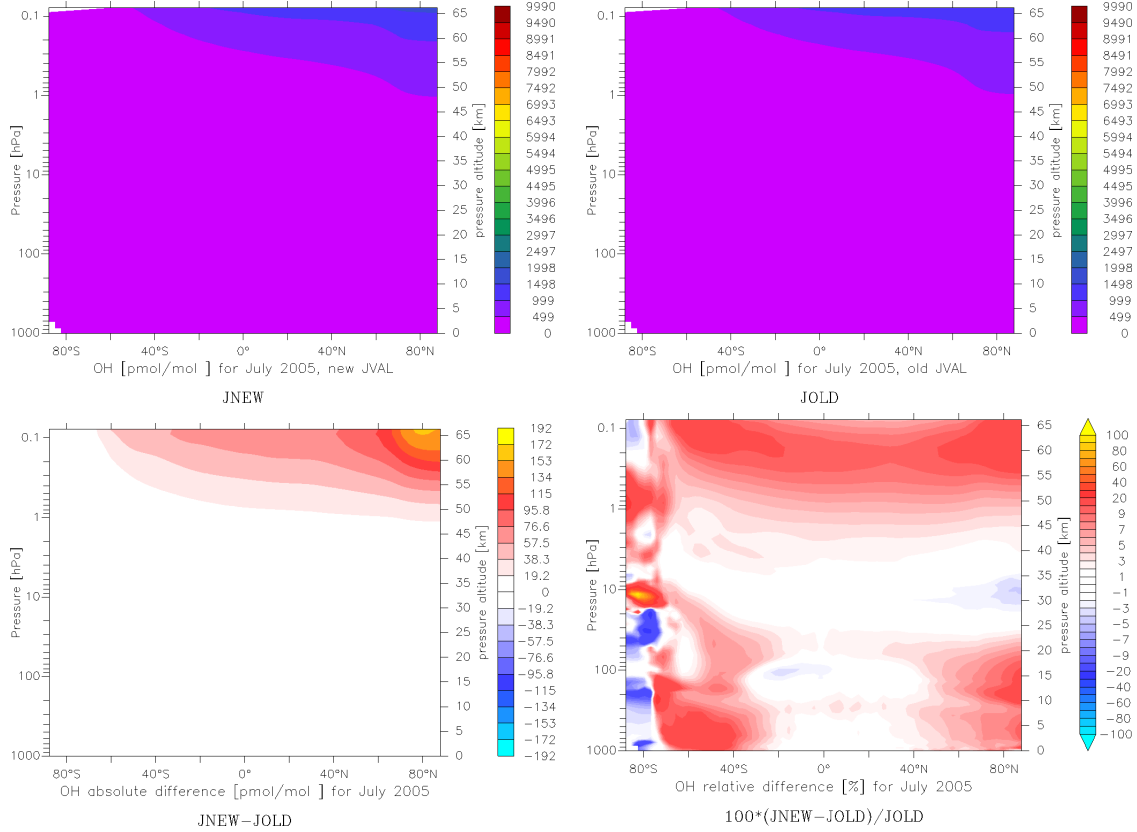

## 2.3 HO<sub>2</sub>

— January —

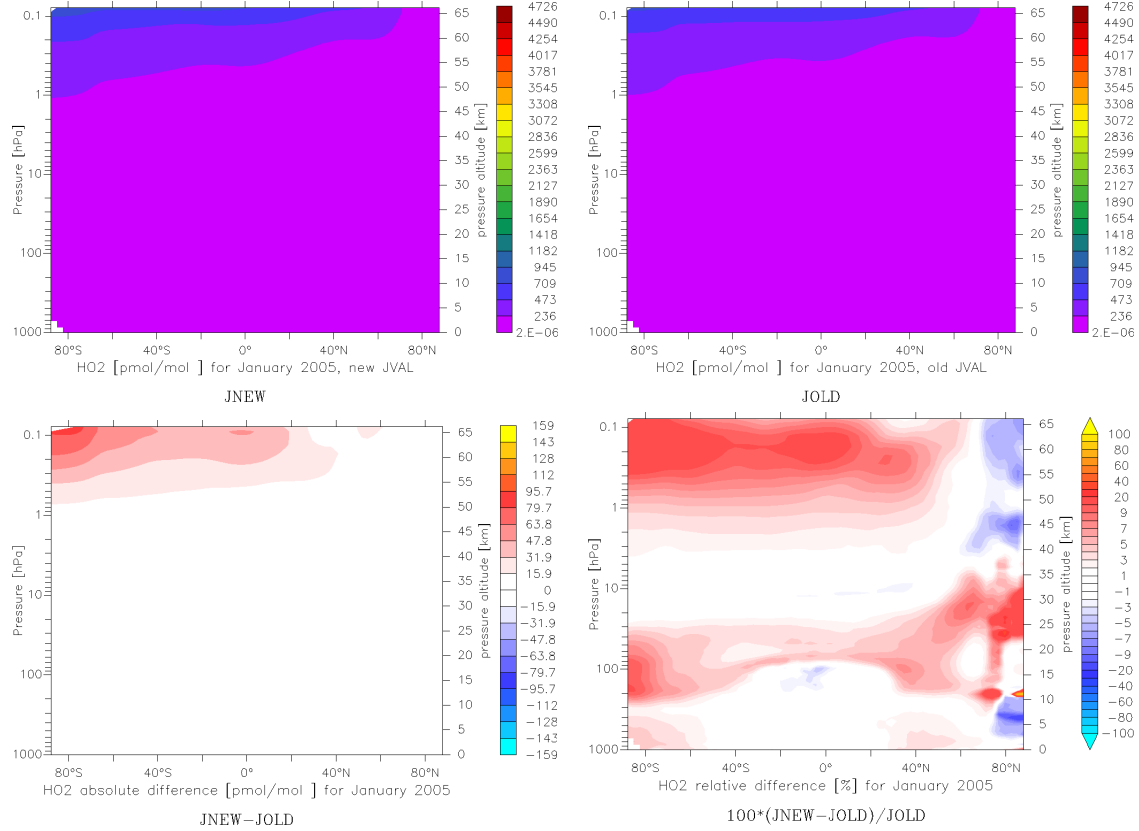

— July —

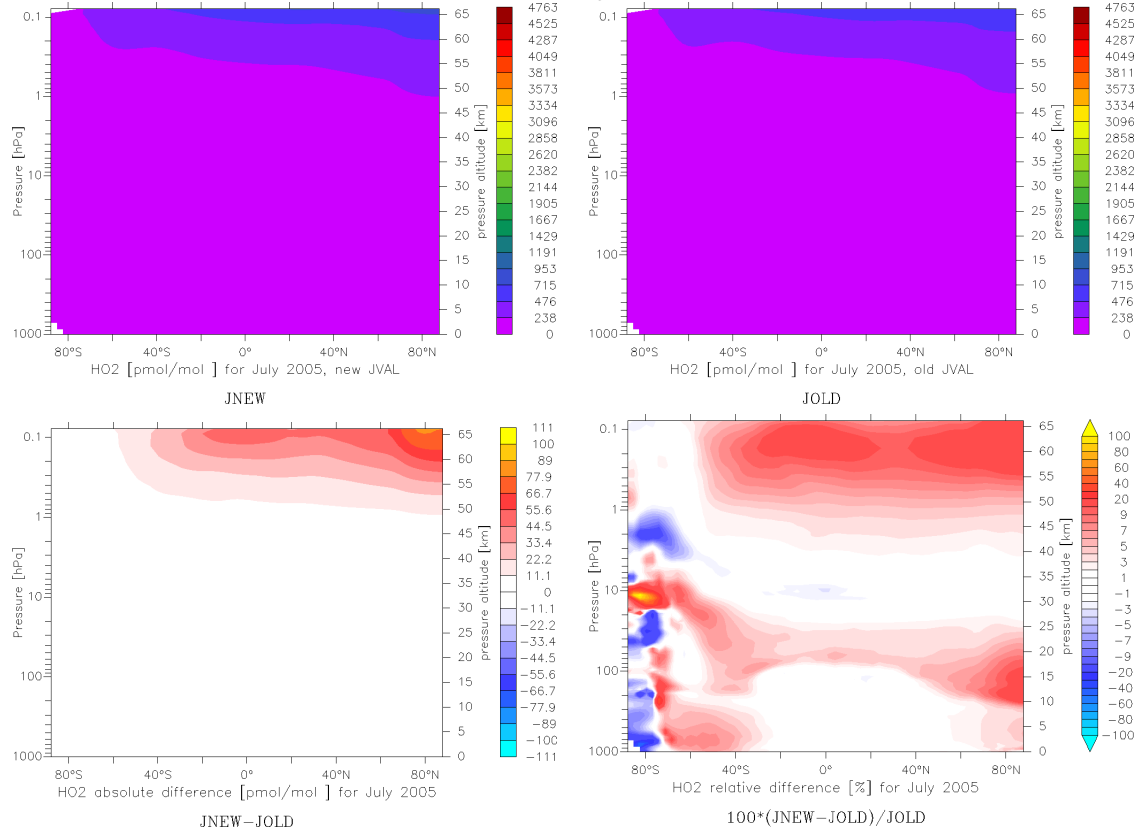



## 2.4 H<sub>2</sub>

— January —

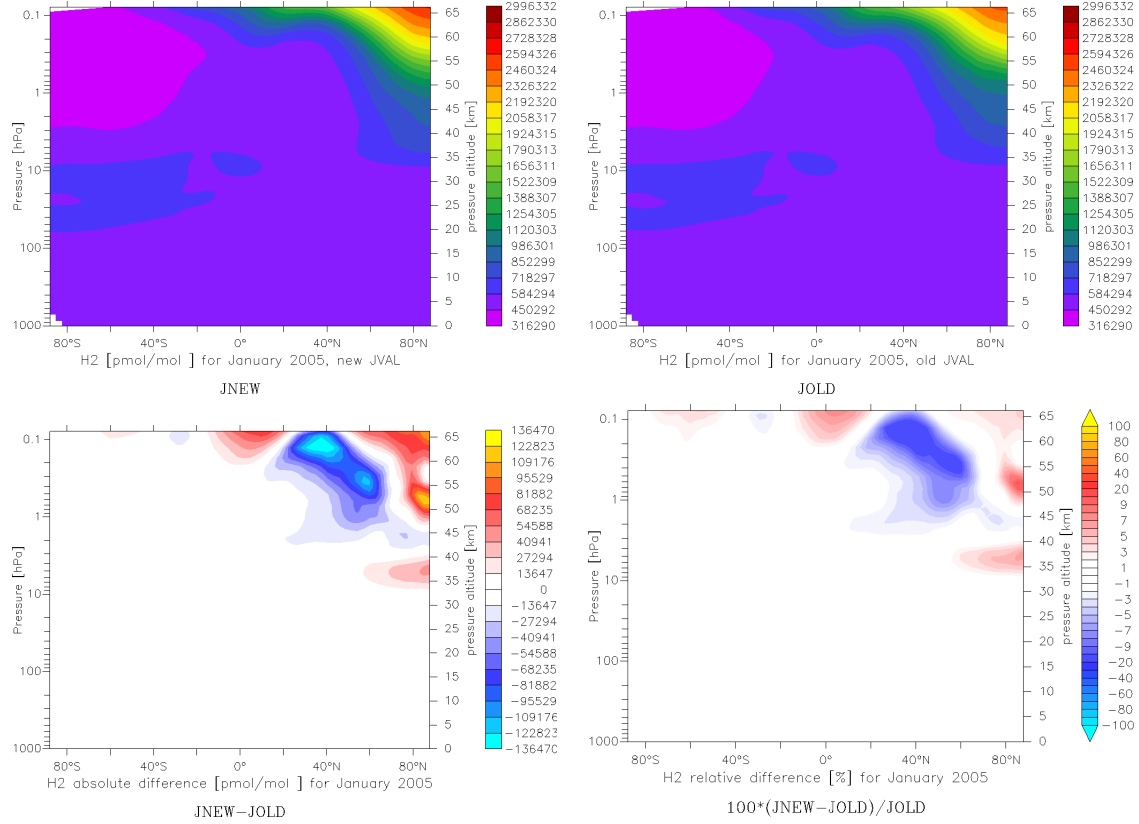

— July —

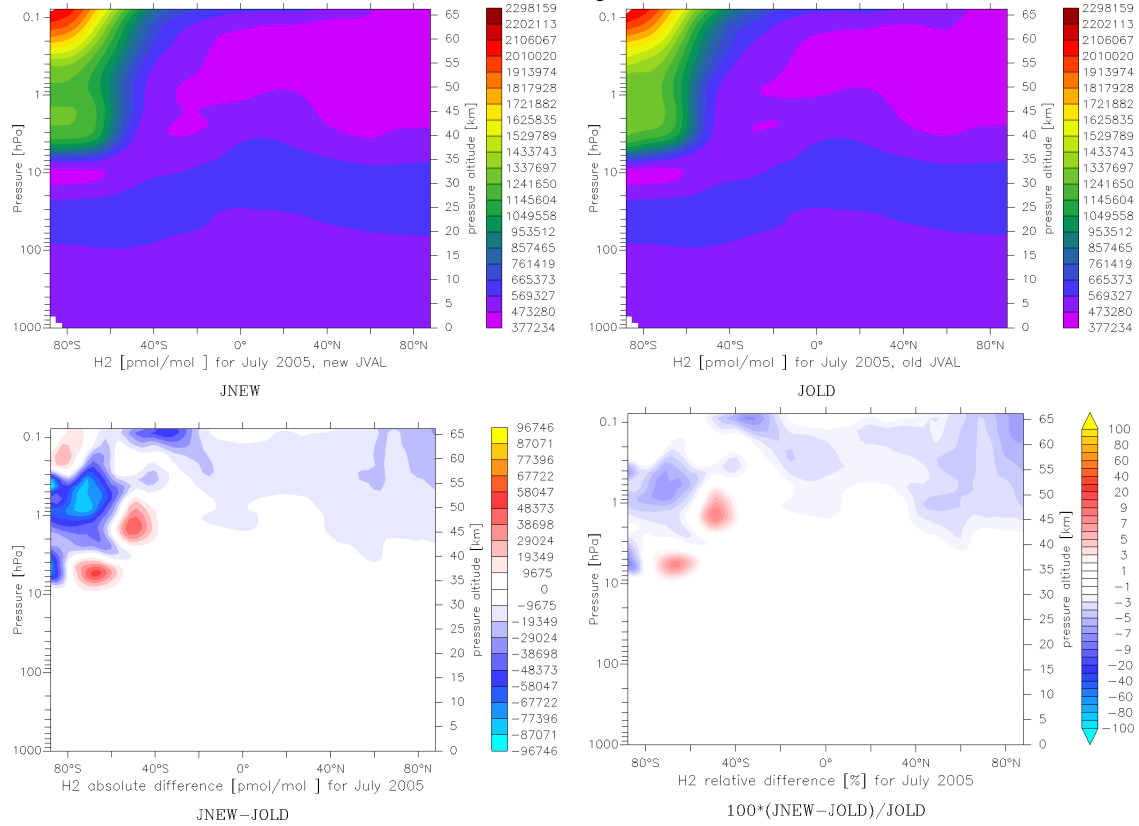

## 2.5 H<sub>2</sub>O

— January —

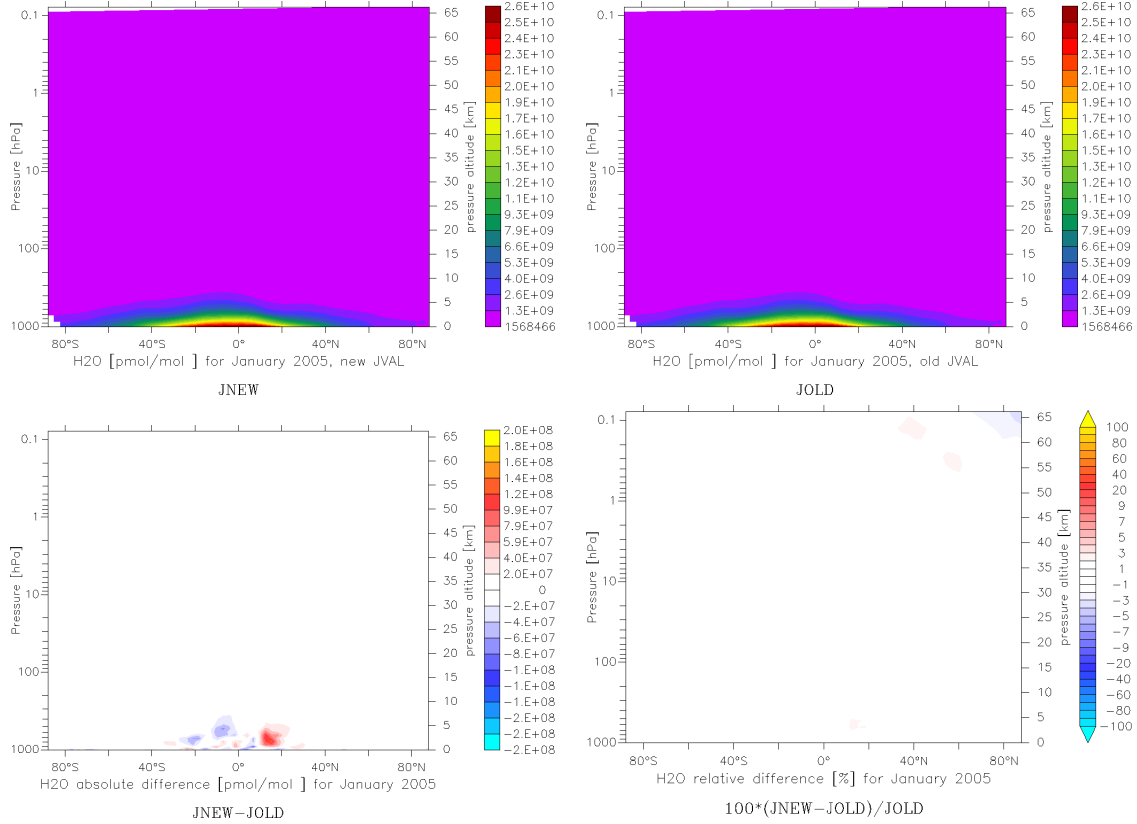

— July —

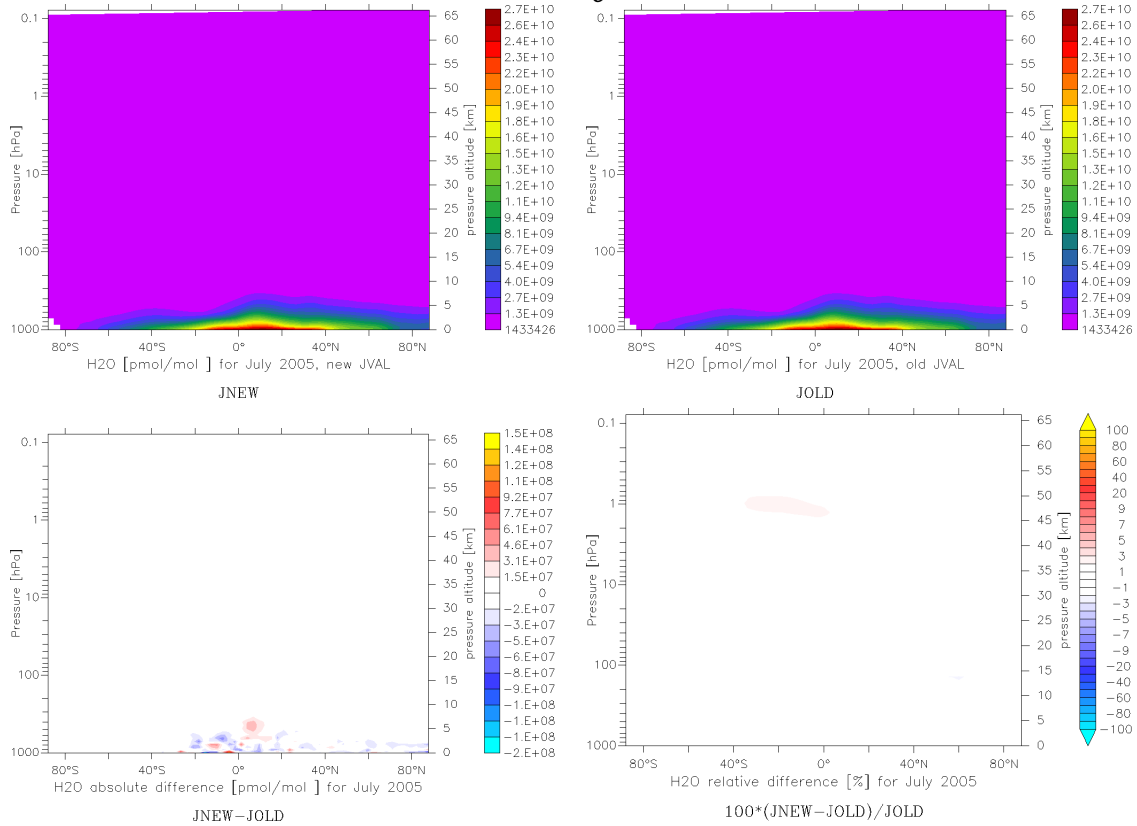

## 2.6 H<sub>2</sub>O<sub>2</sub>

— January —

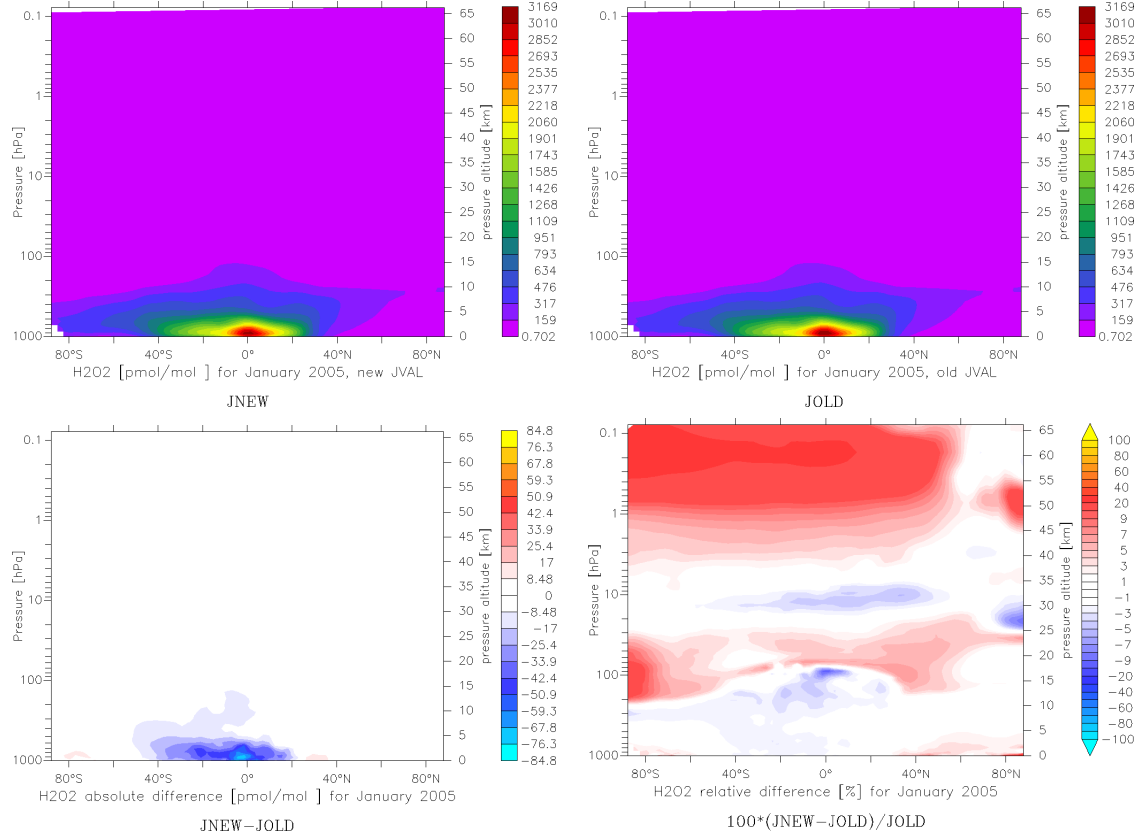

— July —

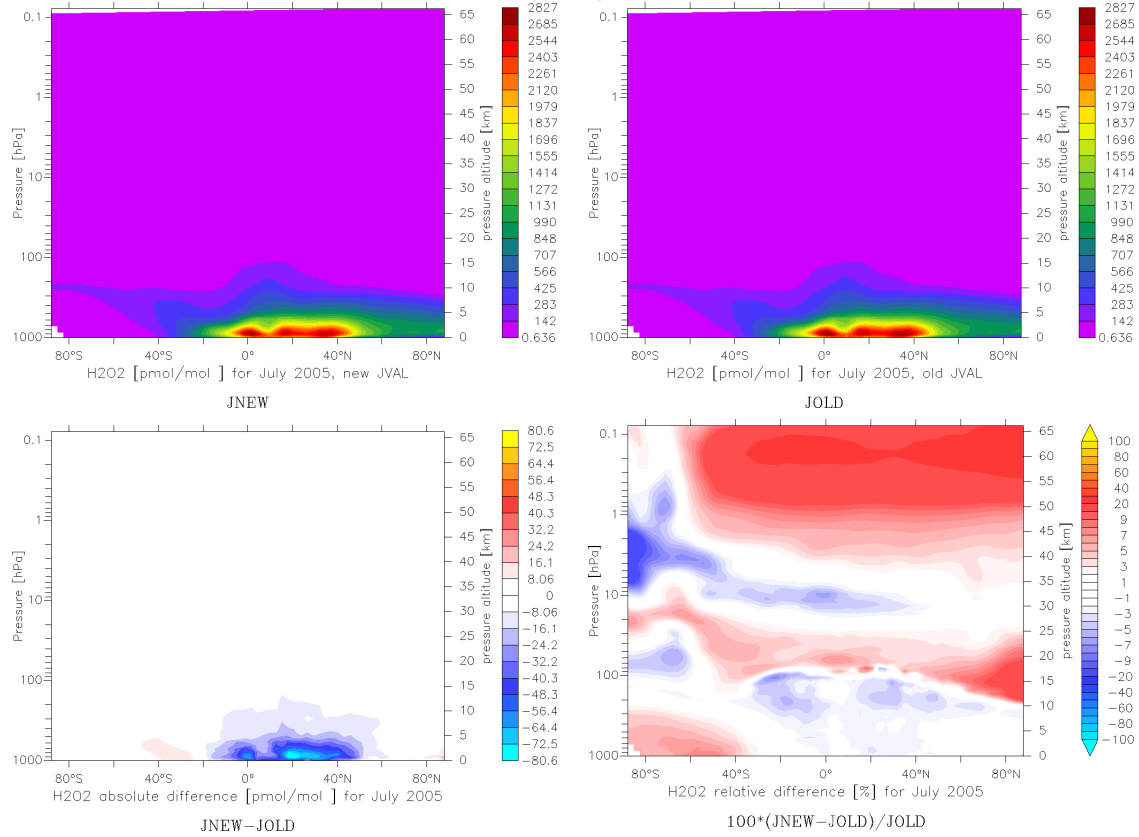

# 3 Nitrogen compounds

## 3.1 HONO

— January —

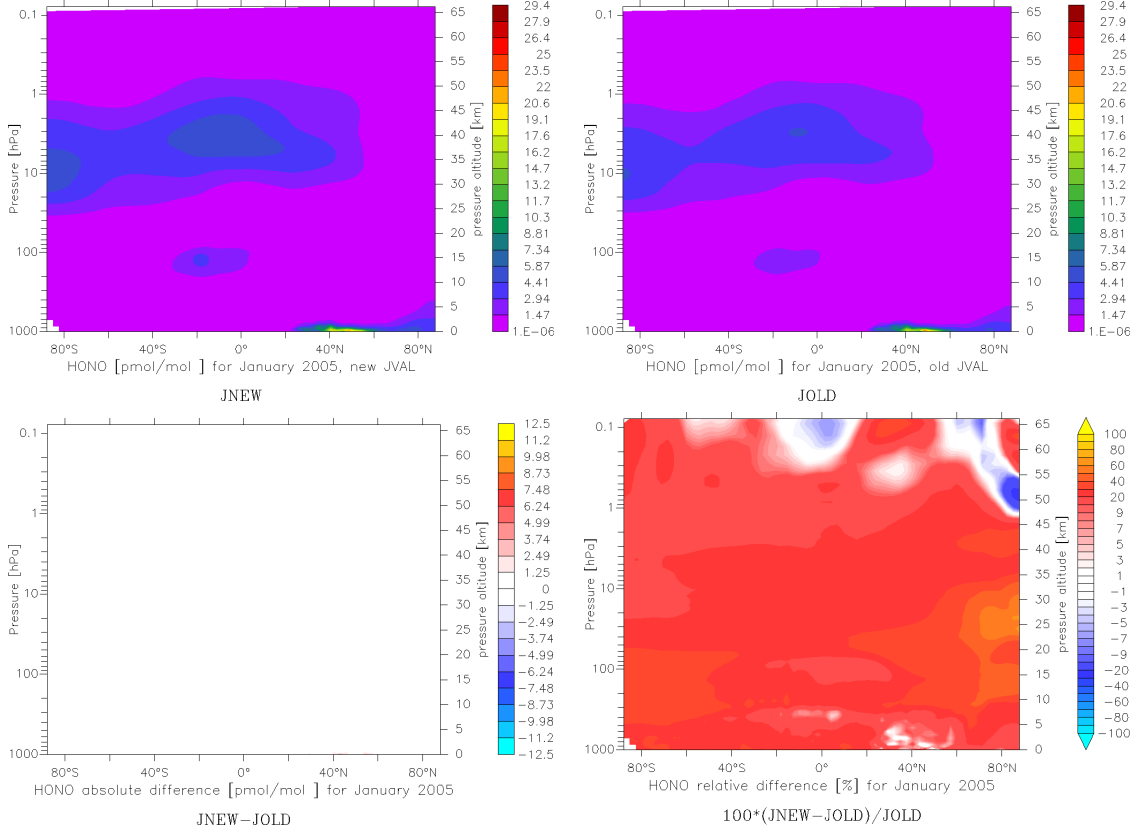

— July —

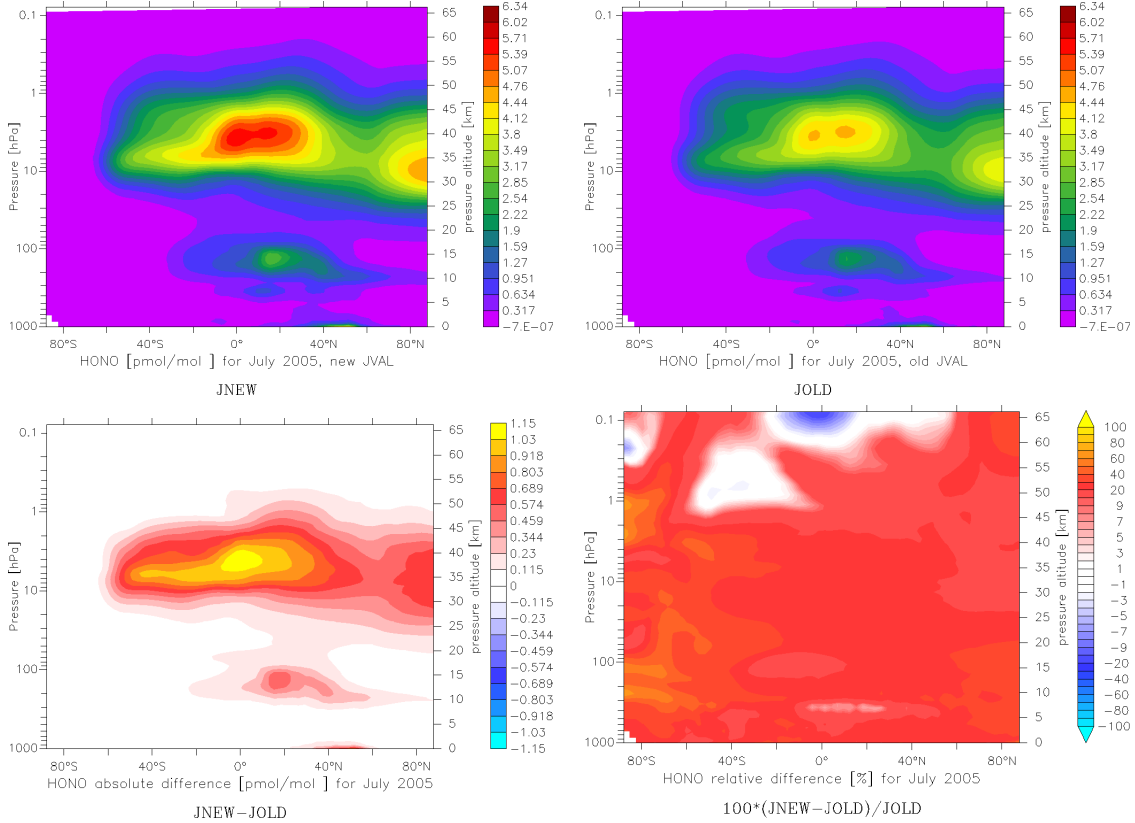

## 3.2 N<sub>2</sub>O

— January —

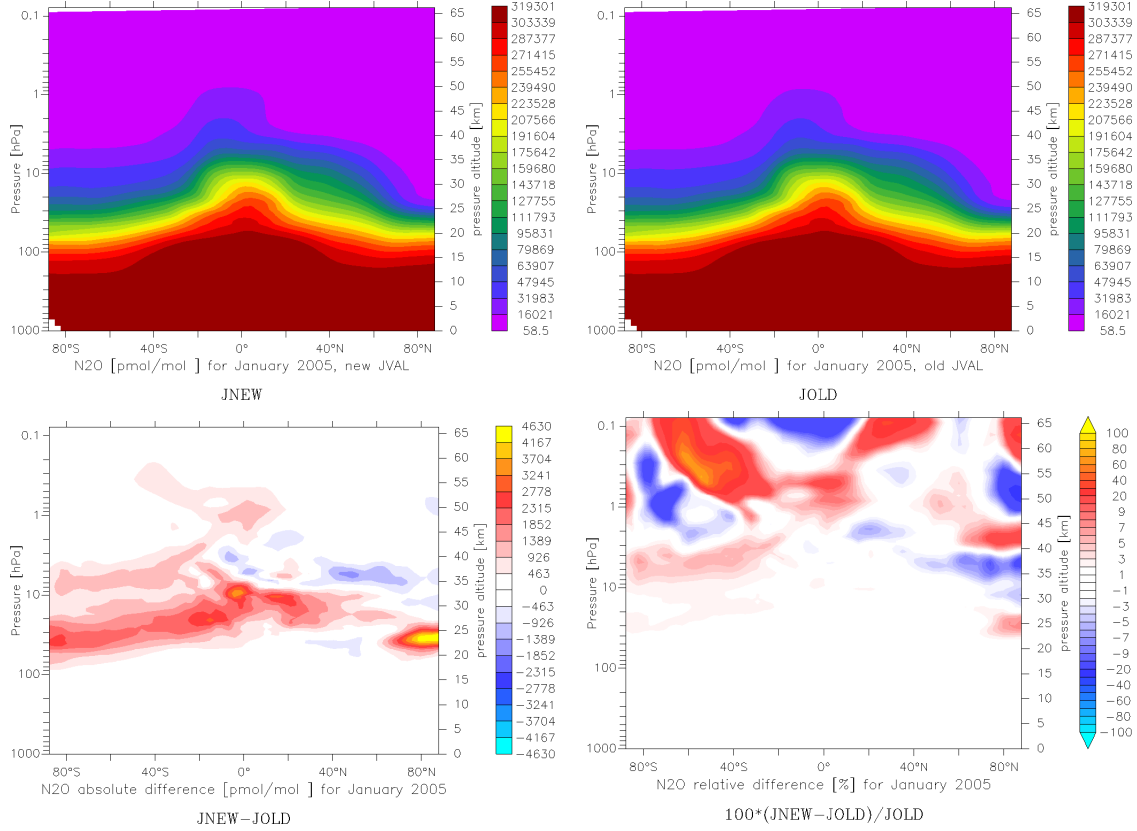

— July —

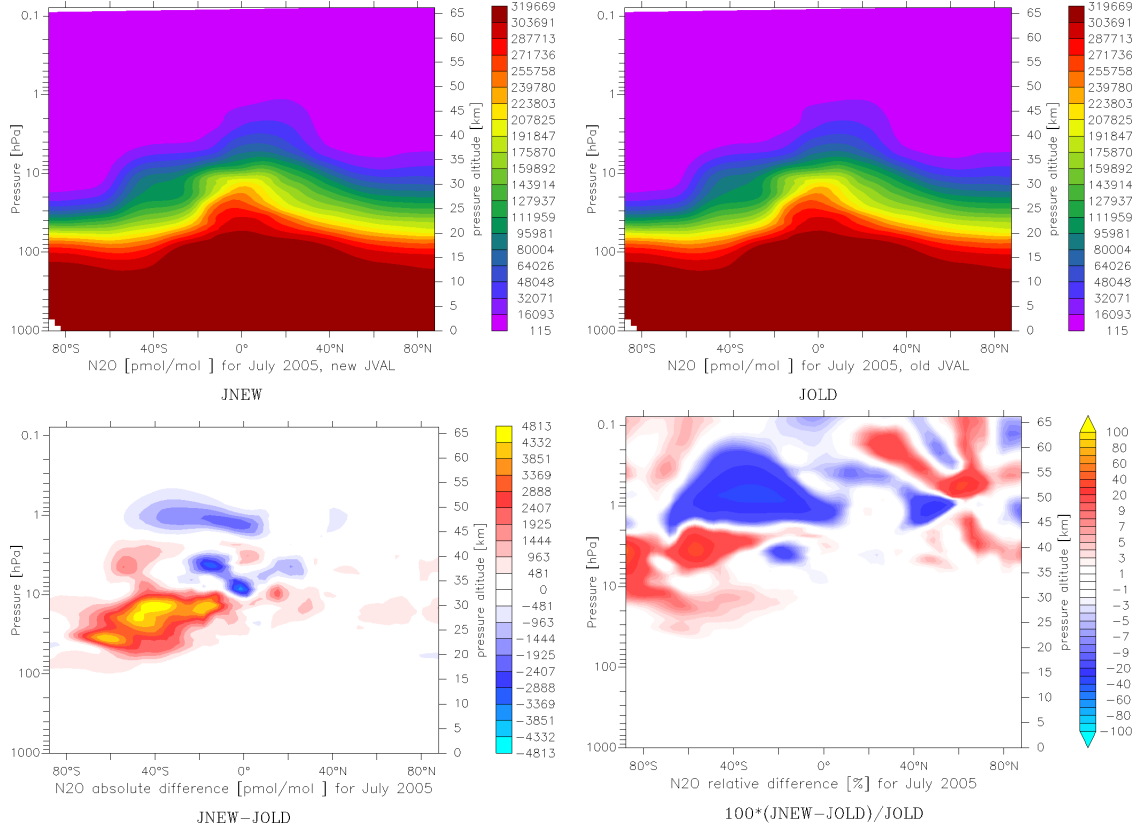

### 3.3 NO

— January —

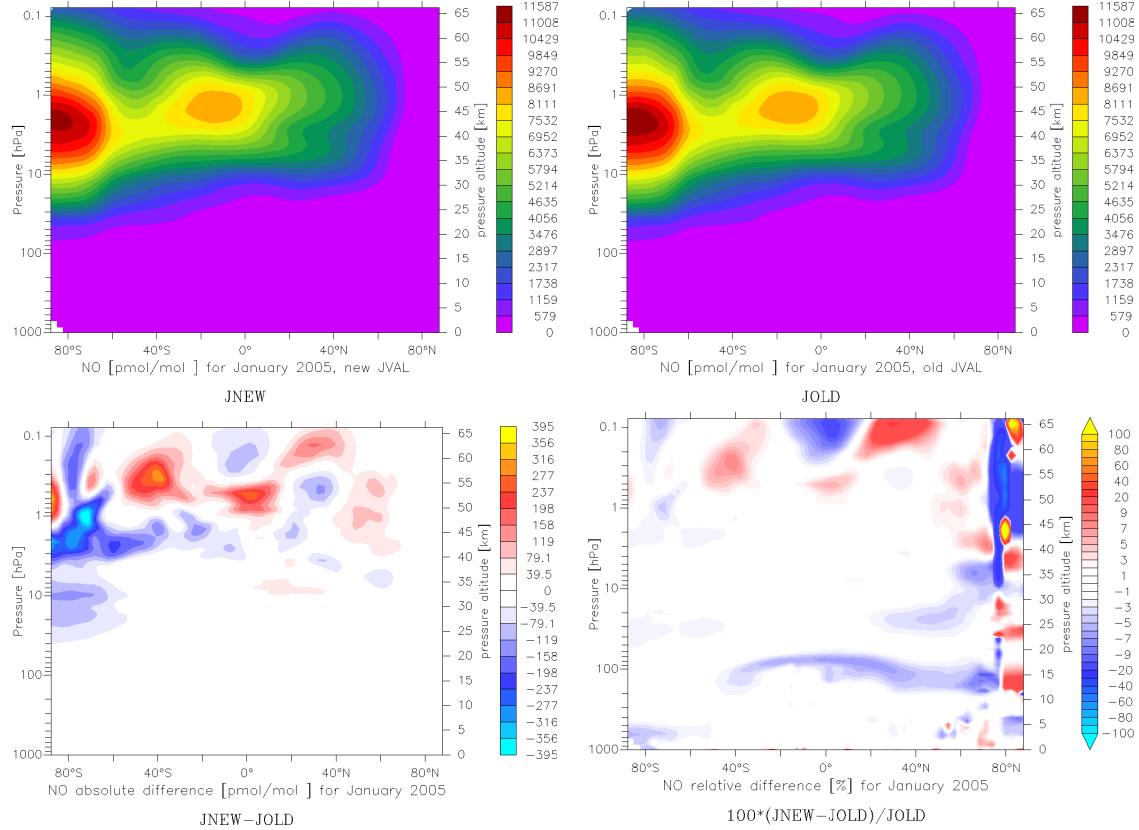

— July —

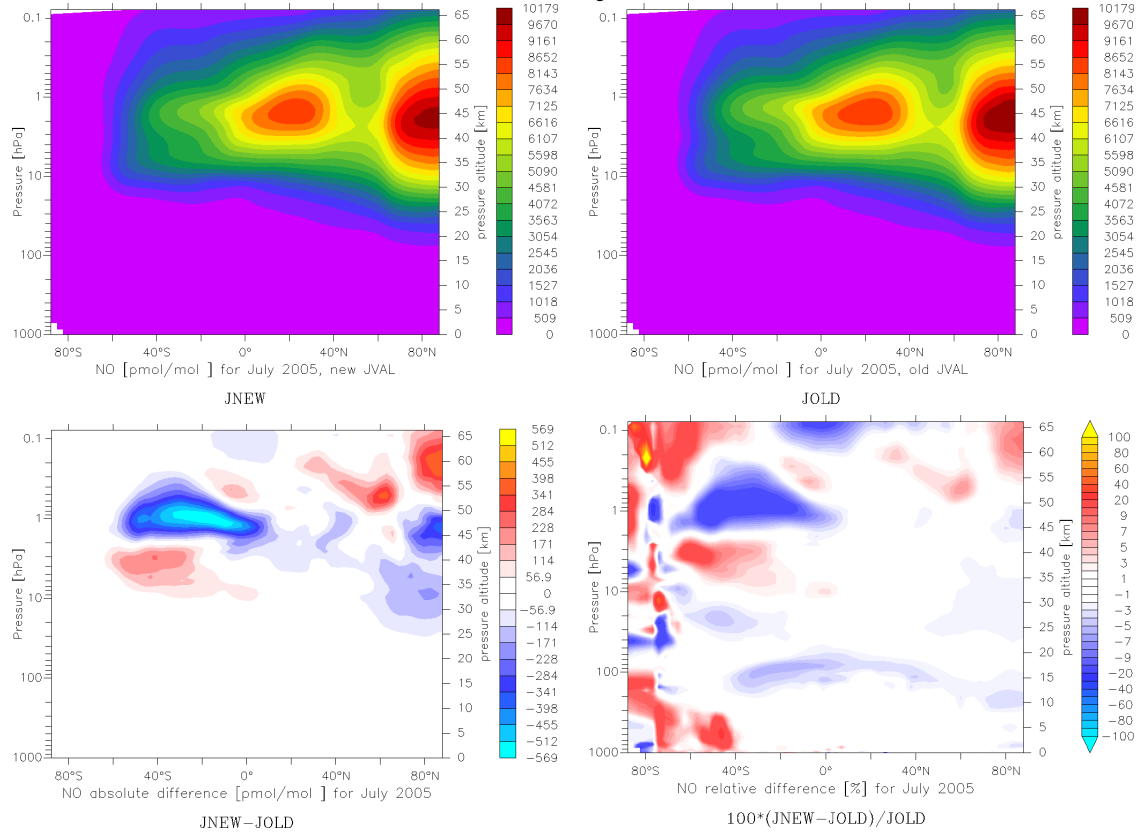

### 3.4 NO<sub>2</sub>

— January —

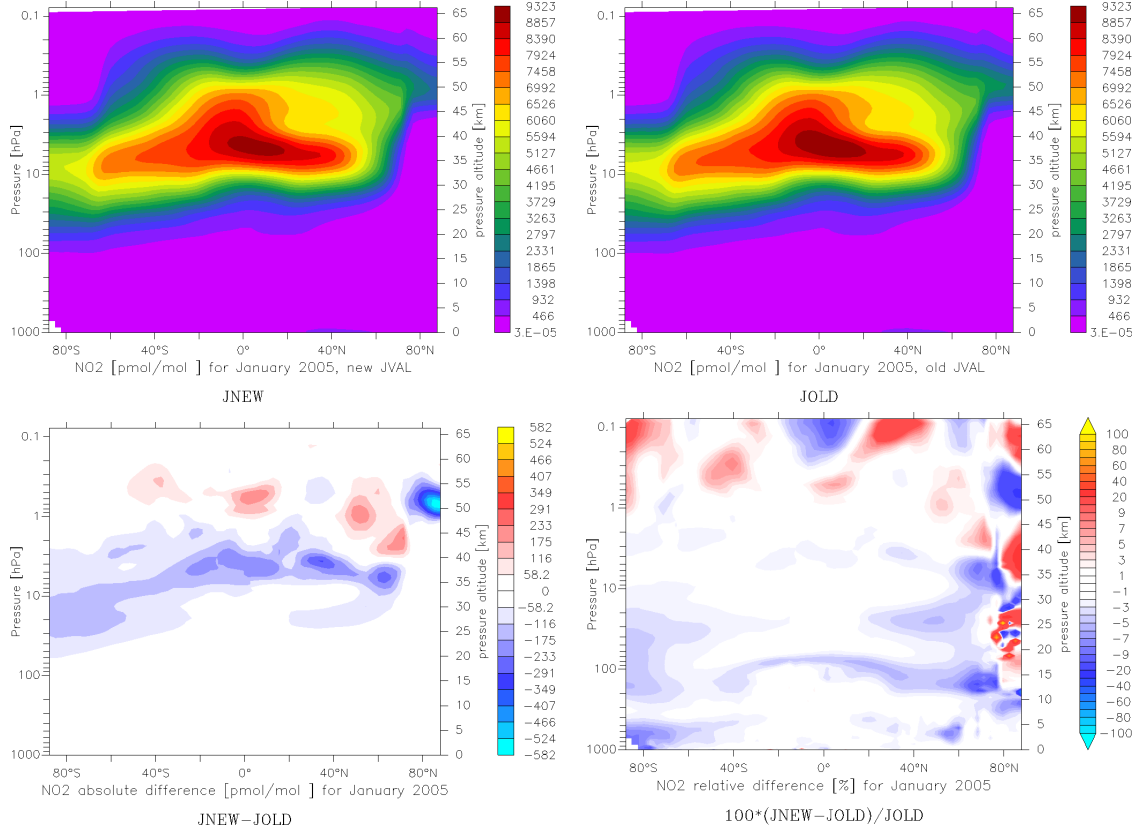

— July —

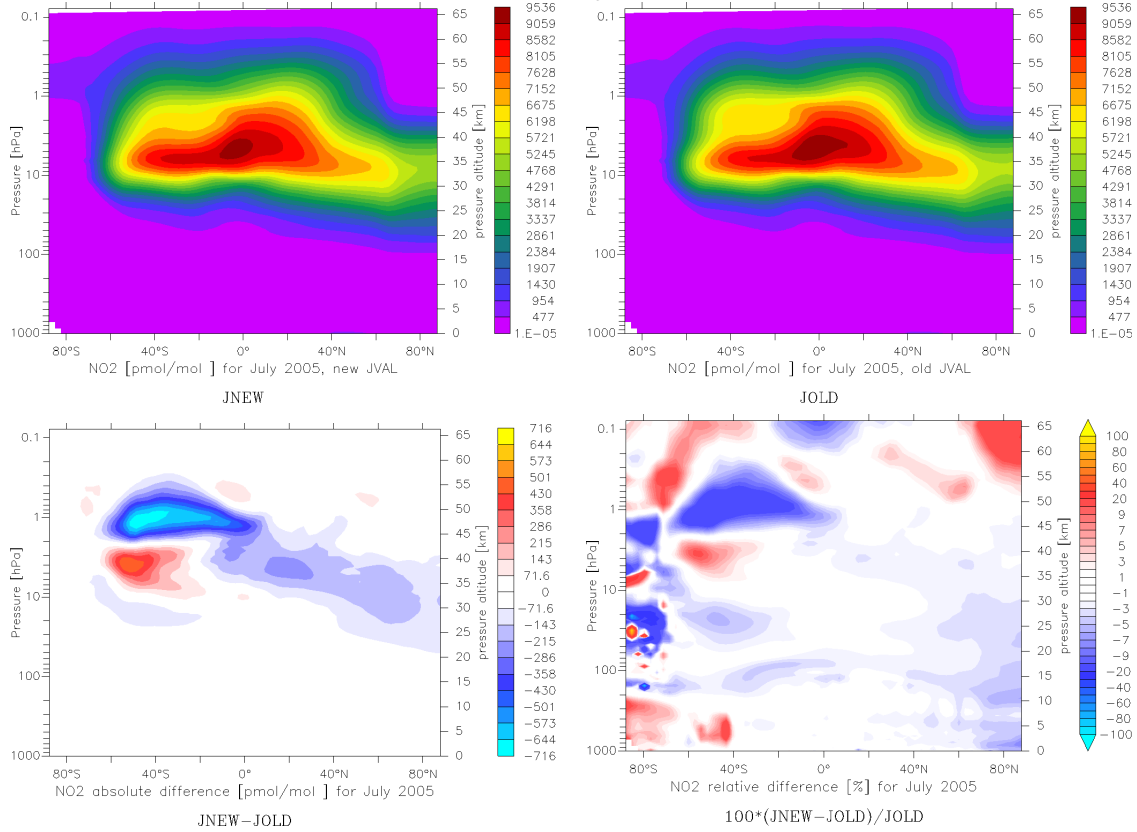

### 3.5 NO<sub>x</sub>

— January —

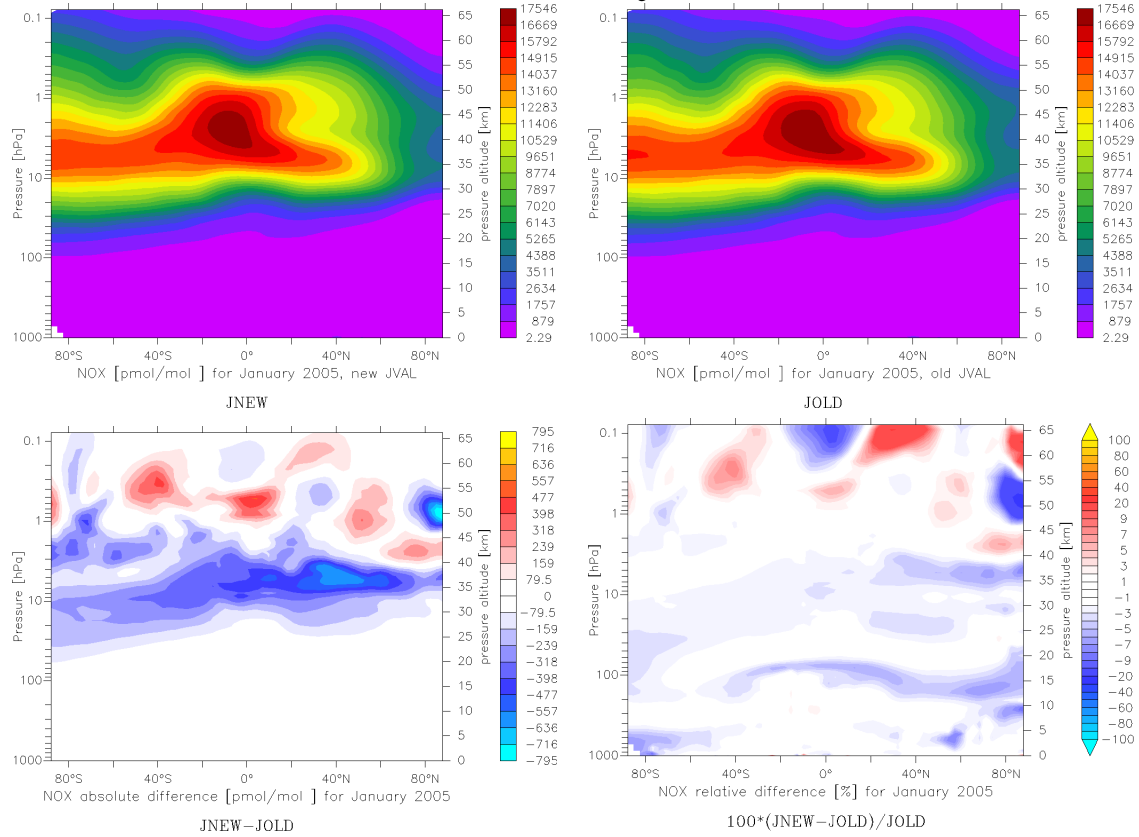

— July —

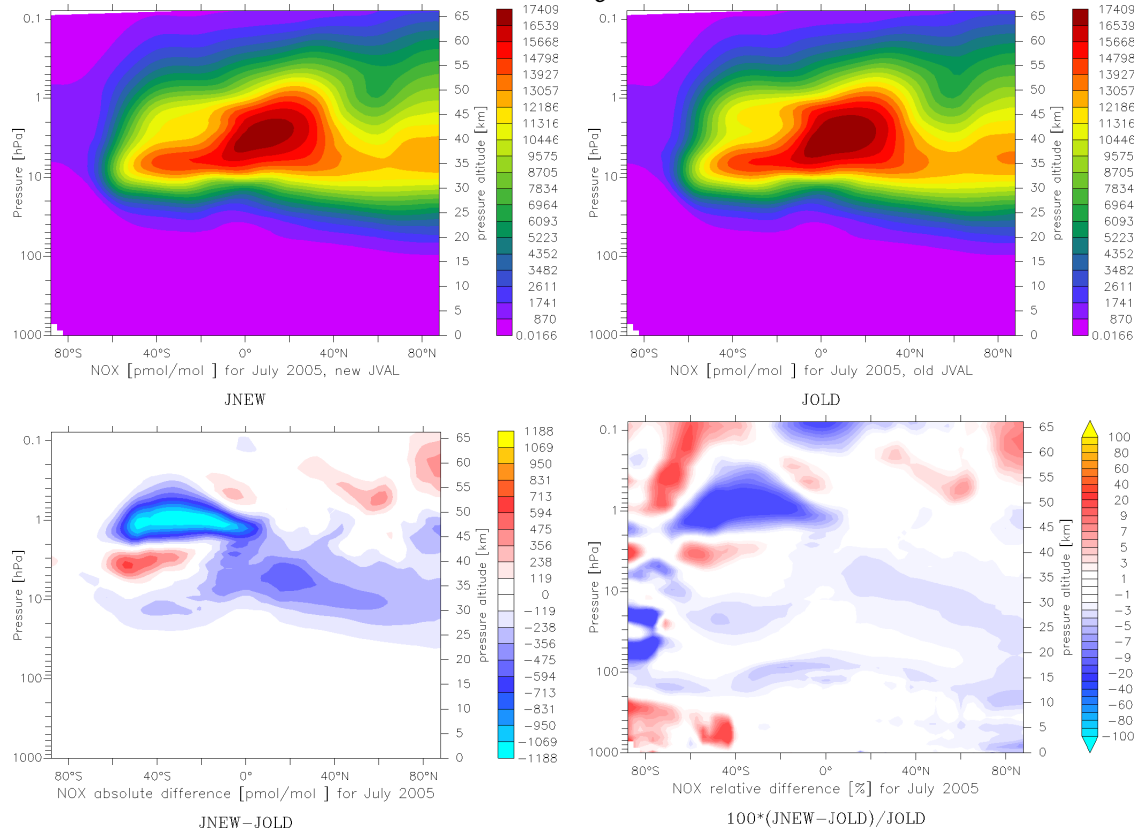



### 3.6 NO<sub>3</sub>

— January —

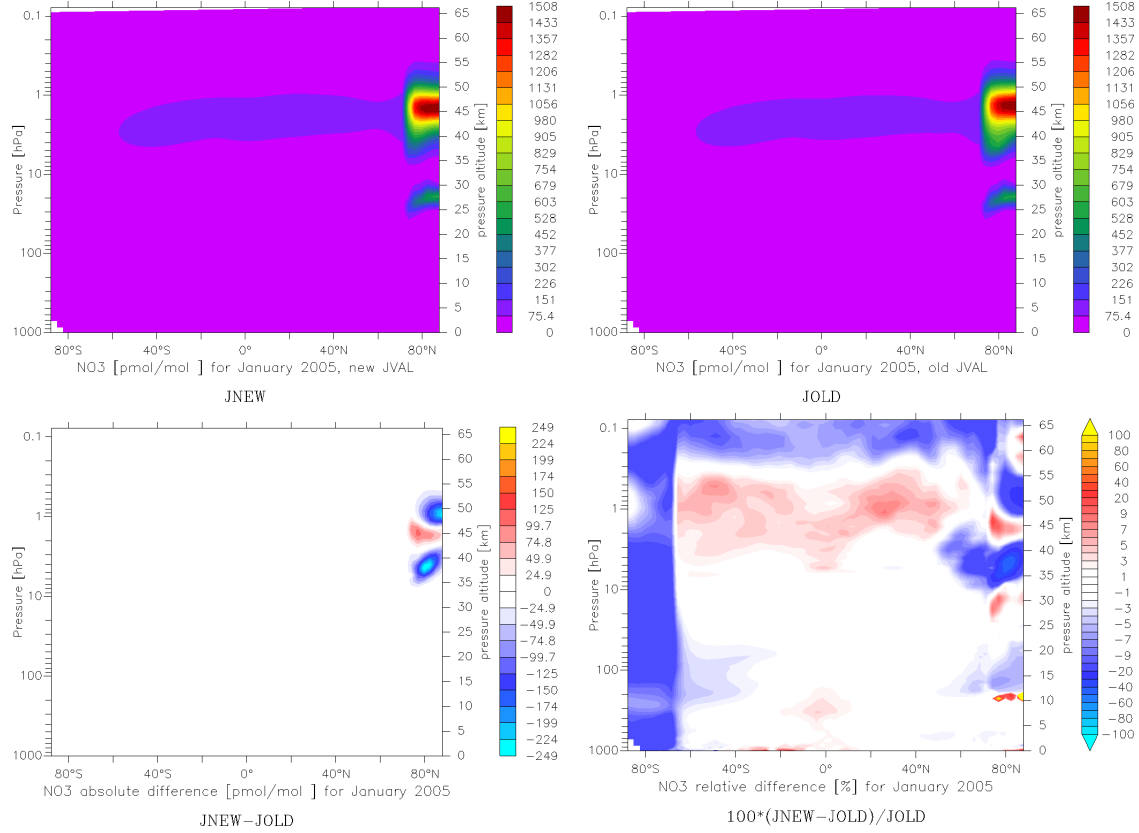

— July —

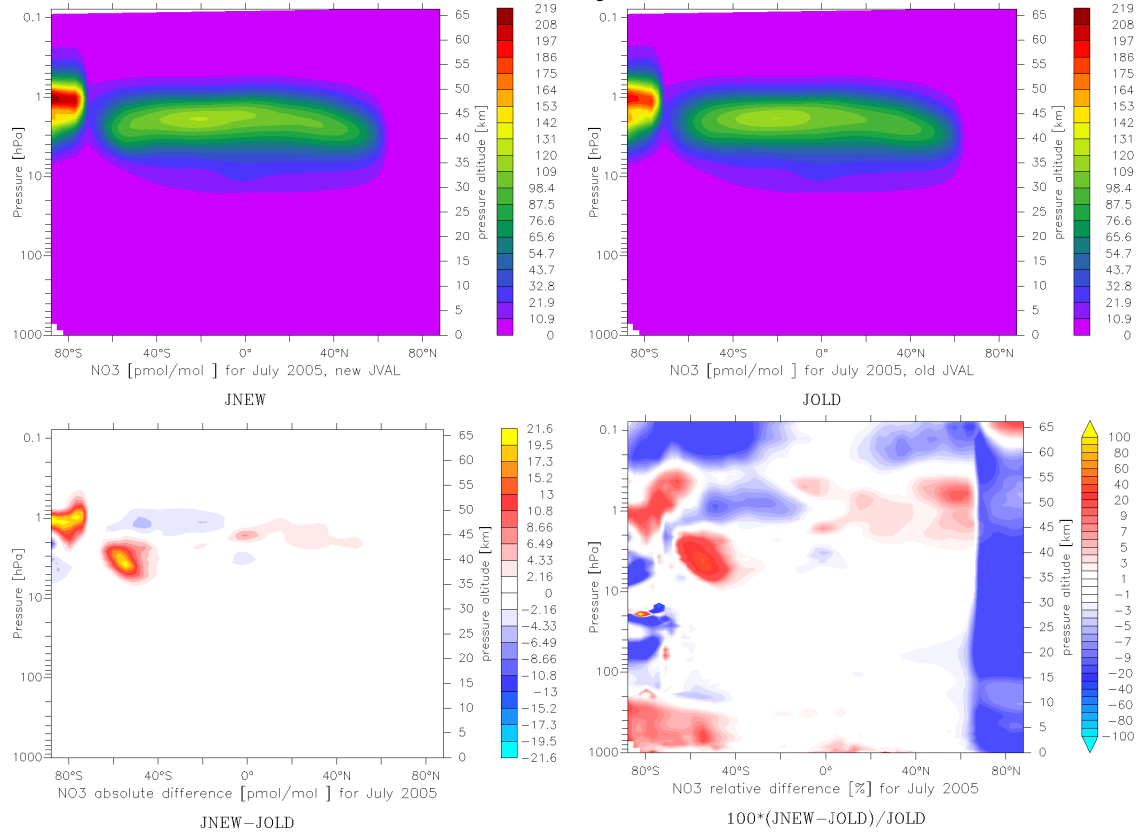

### 3.7 N<sub>2</sub>O<sub>5</sub>

— January —

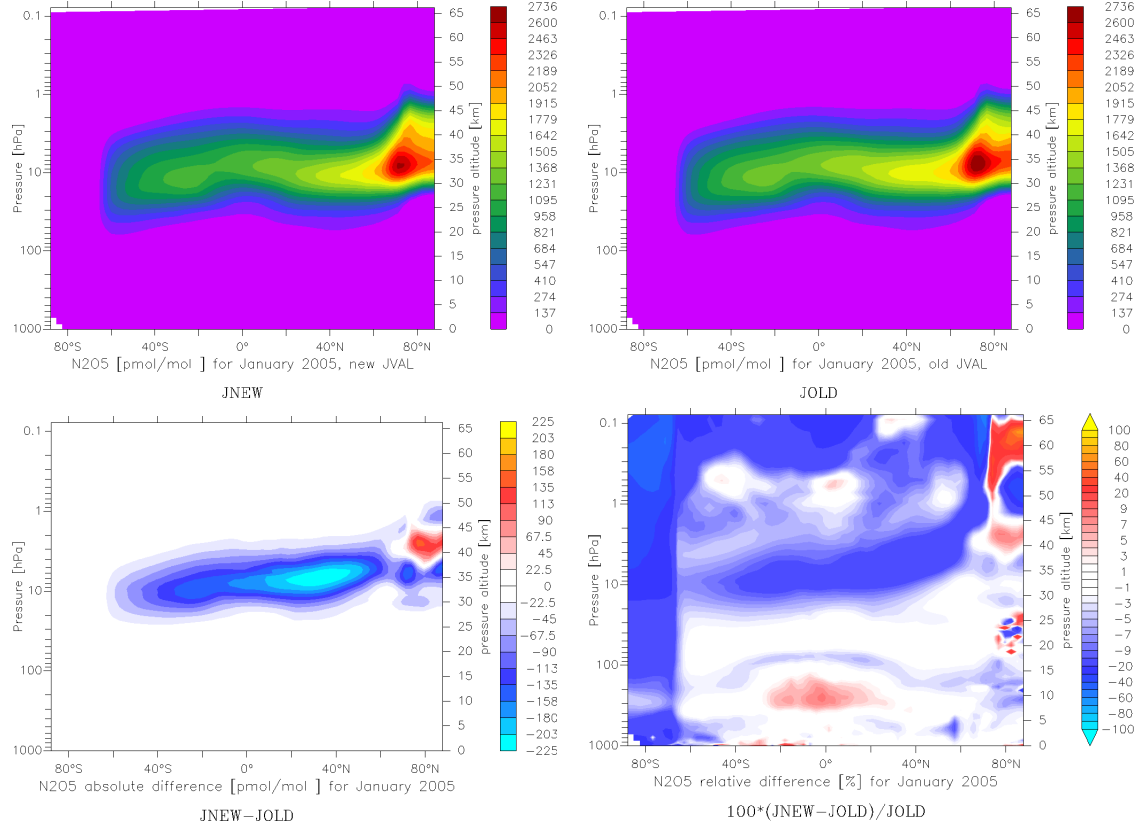

— July —

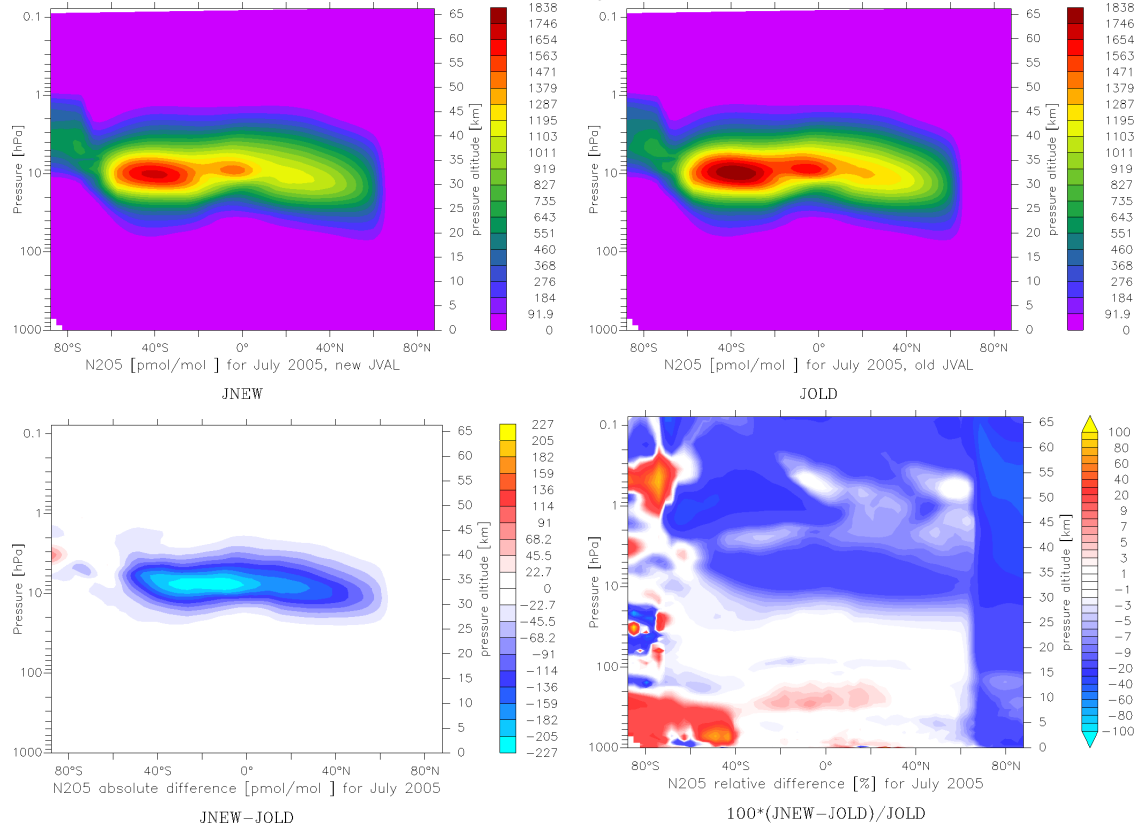

### 3.8 HNO<sub>3</sub>

— January —

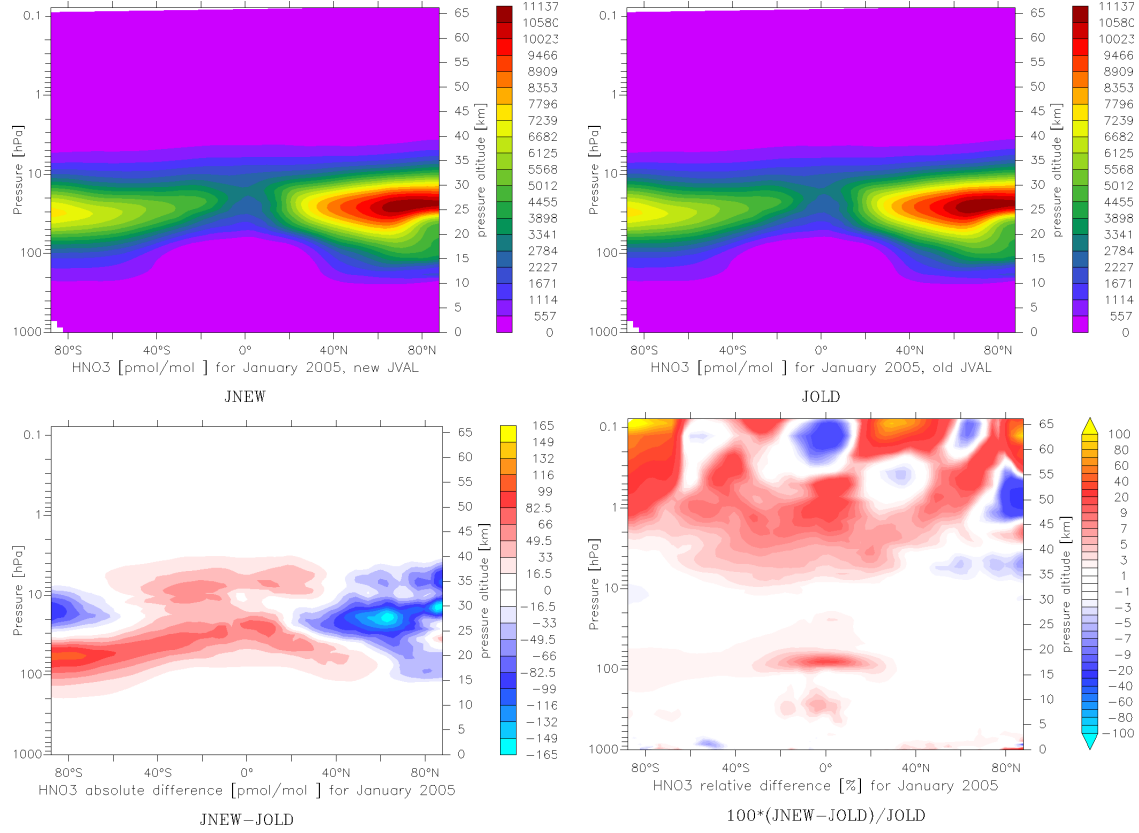

— July —

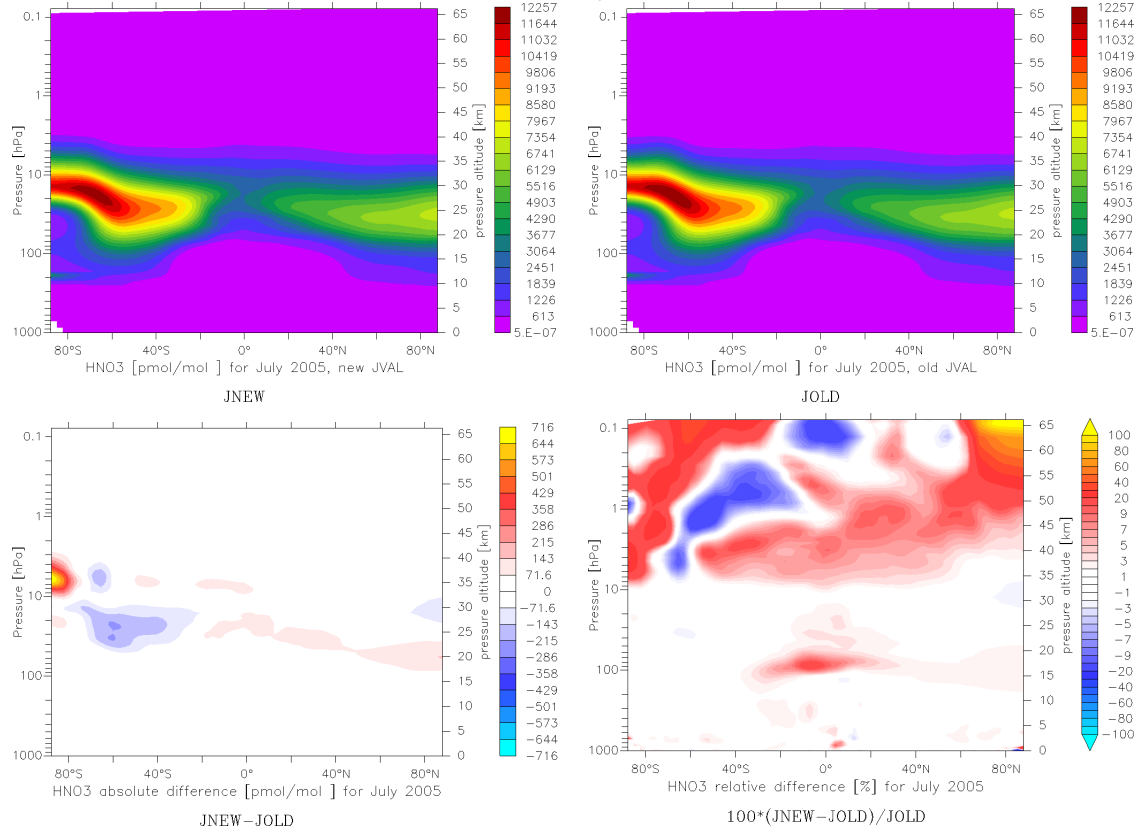

### 3.9 HNO<sub>4</sub>

— January —

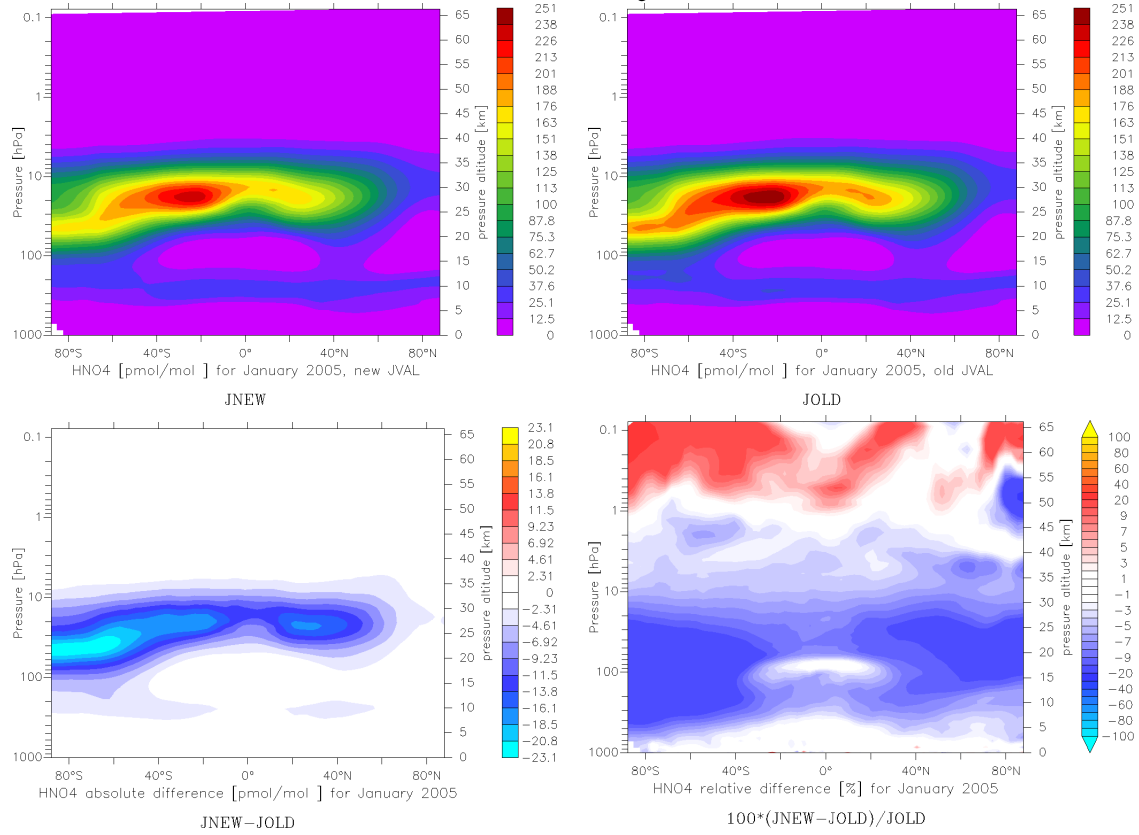

— July —

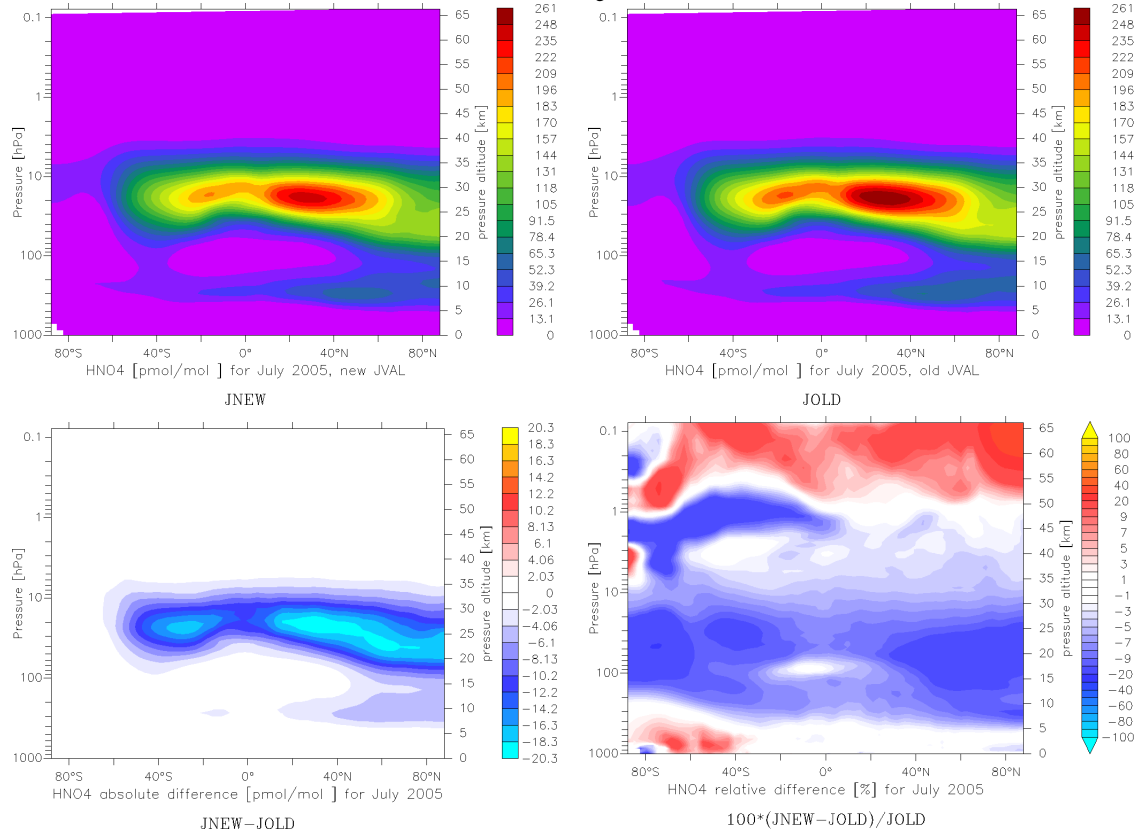

## 4 Carbon compounds

### 4.1 CH<sub>4</sub>

— January —

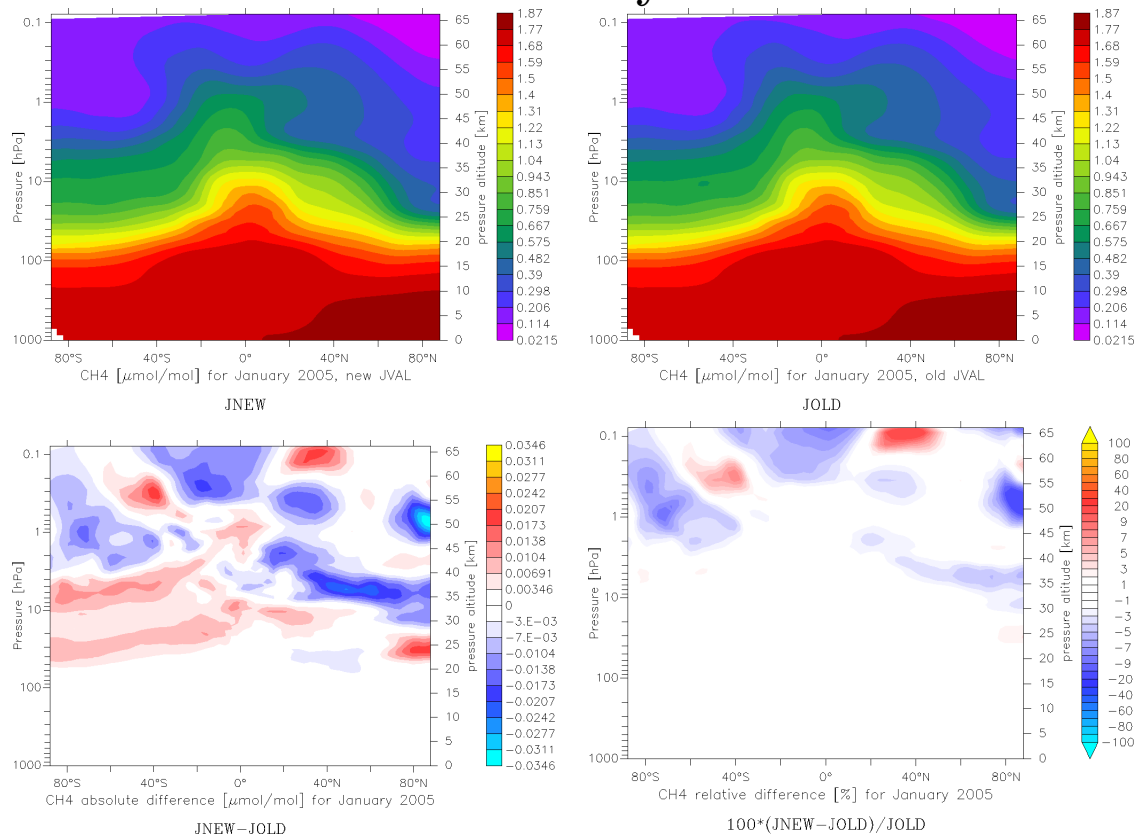

— July —

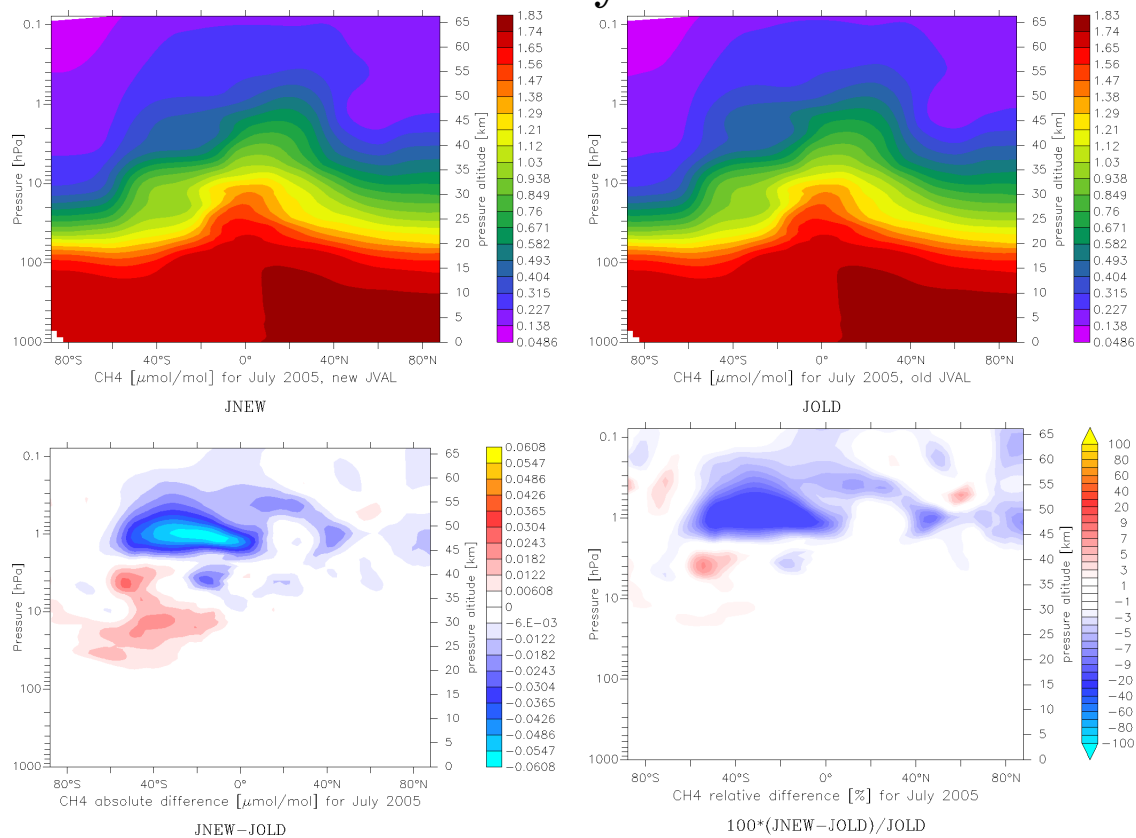

## 4.2 CH<sub>3</sub>OH

— January —

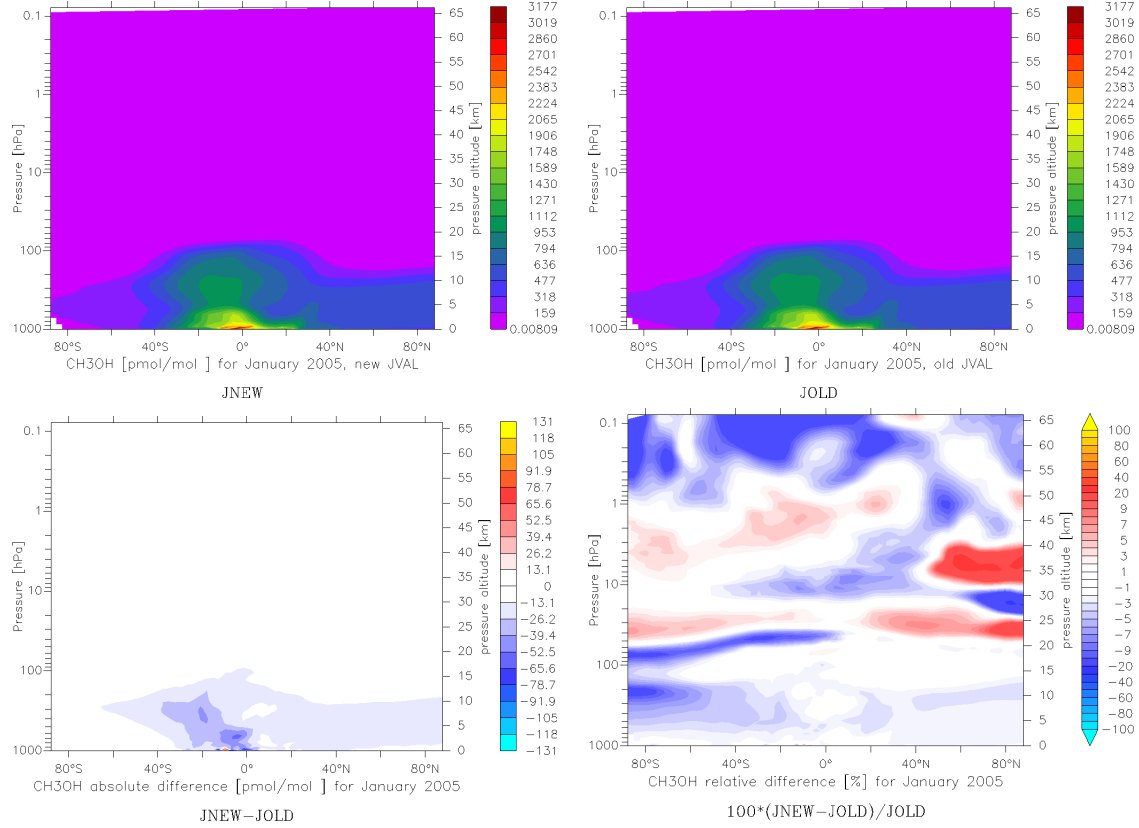

— July —

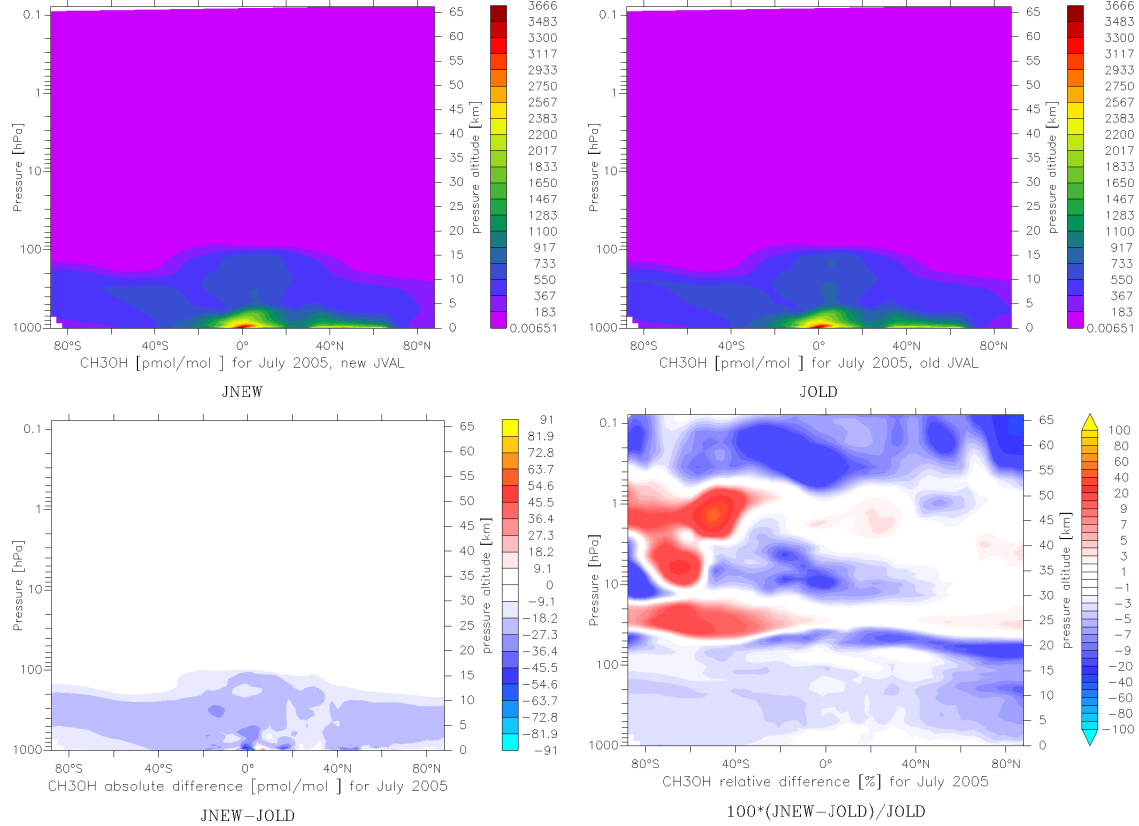

### 4.3 CH<sub>3</sub>O<sub>2</sub>

— January —

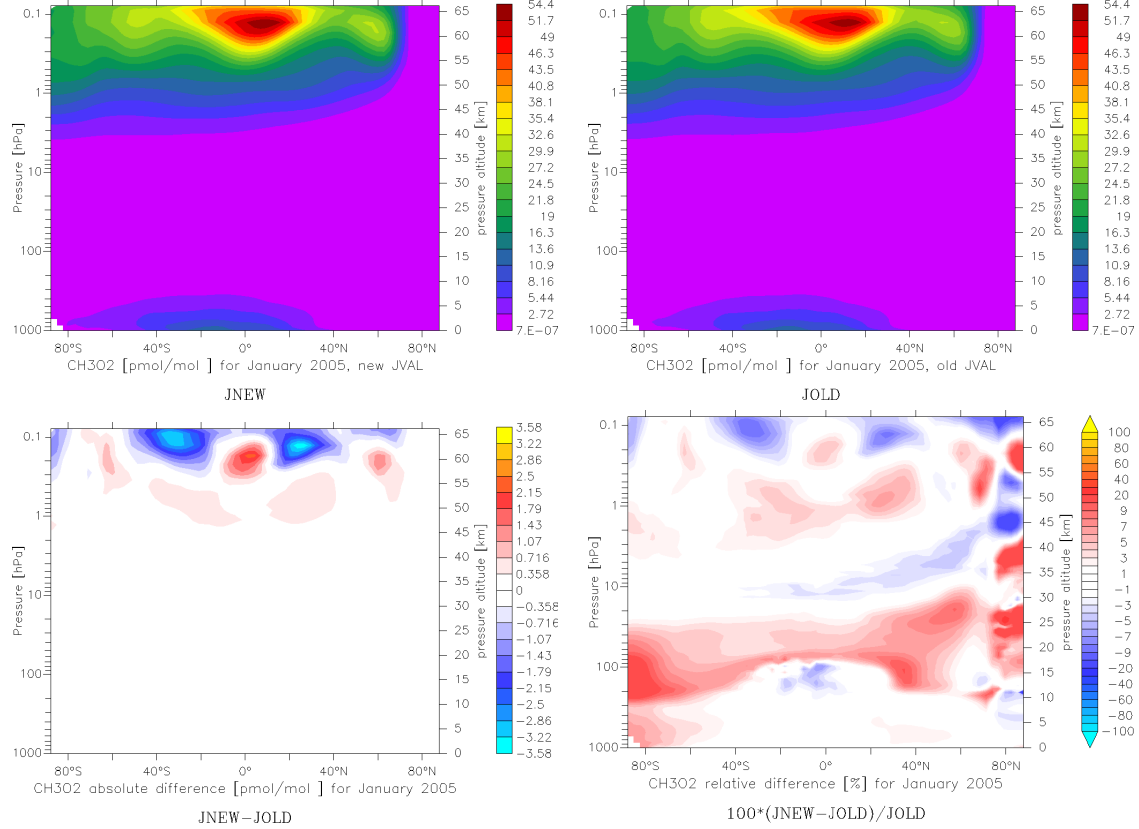

— July —

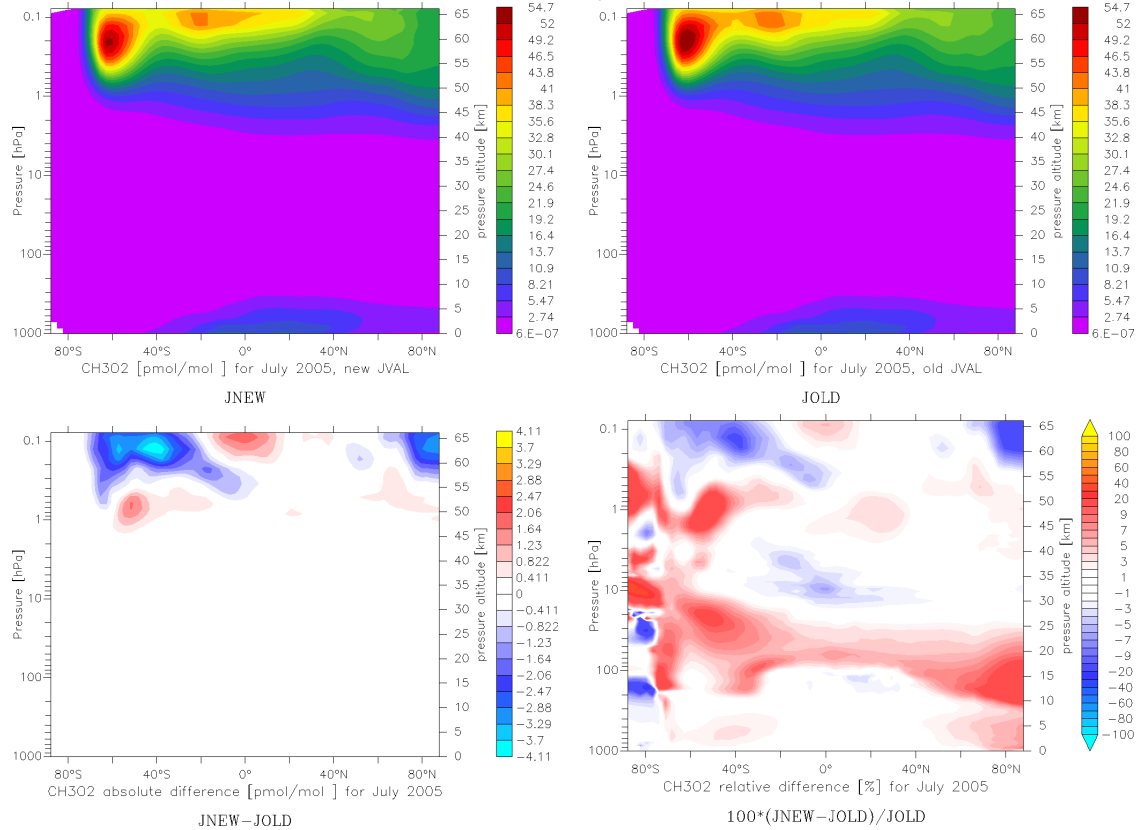

## 4.4 CH<sub>3</sub>OOH

— January —

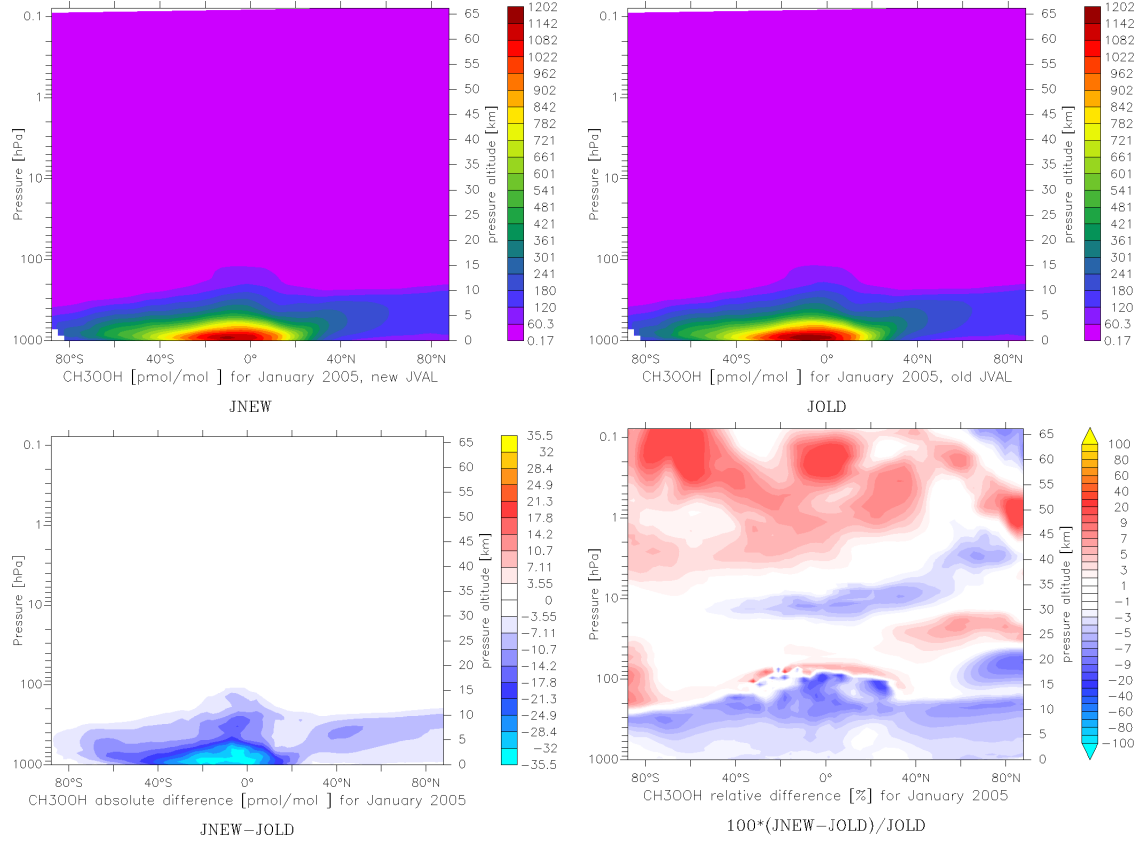

— July —

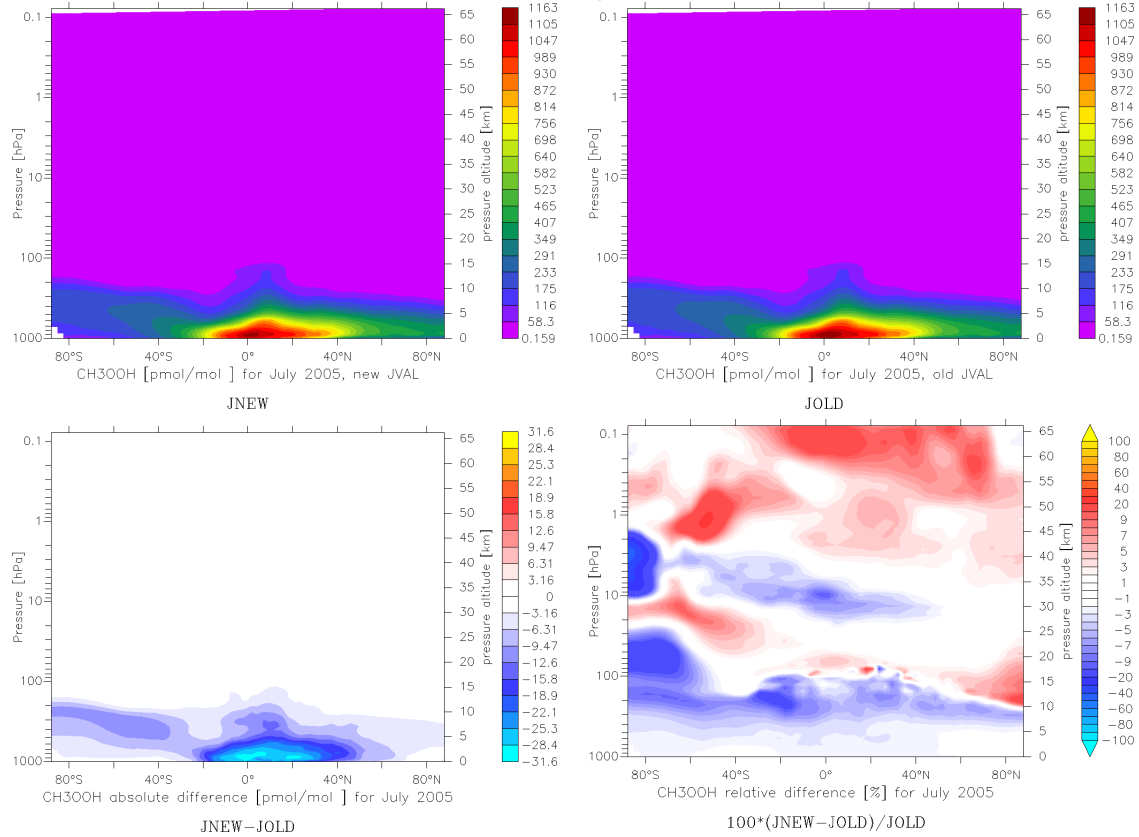



## 4.5 CO<sub>2</sub>

— January —

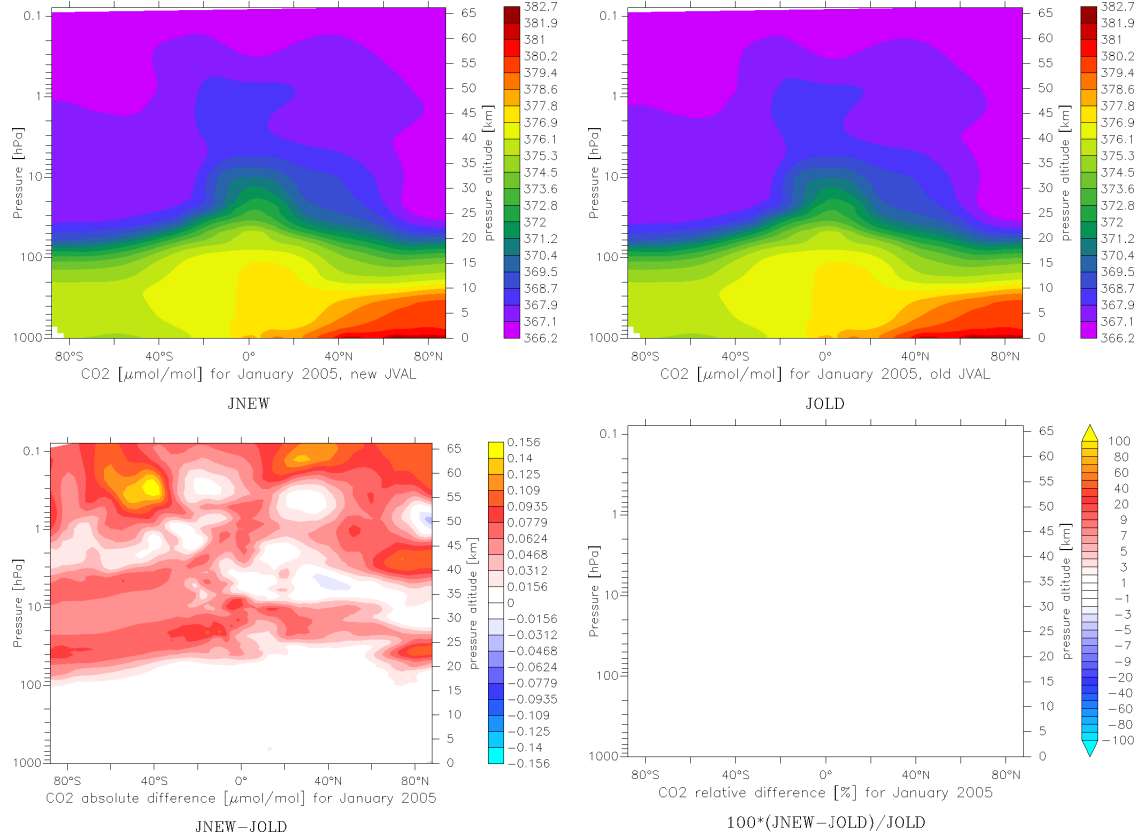

— July —

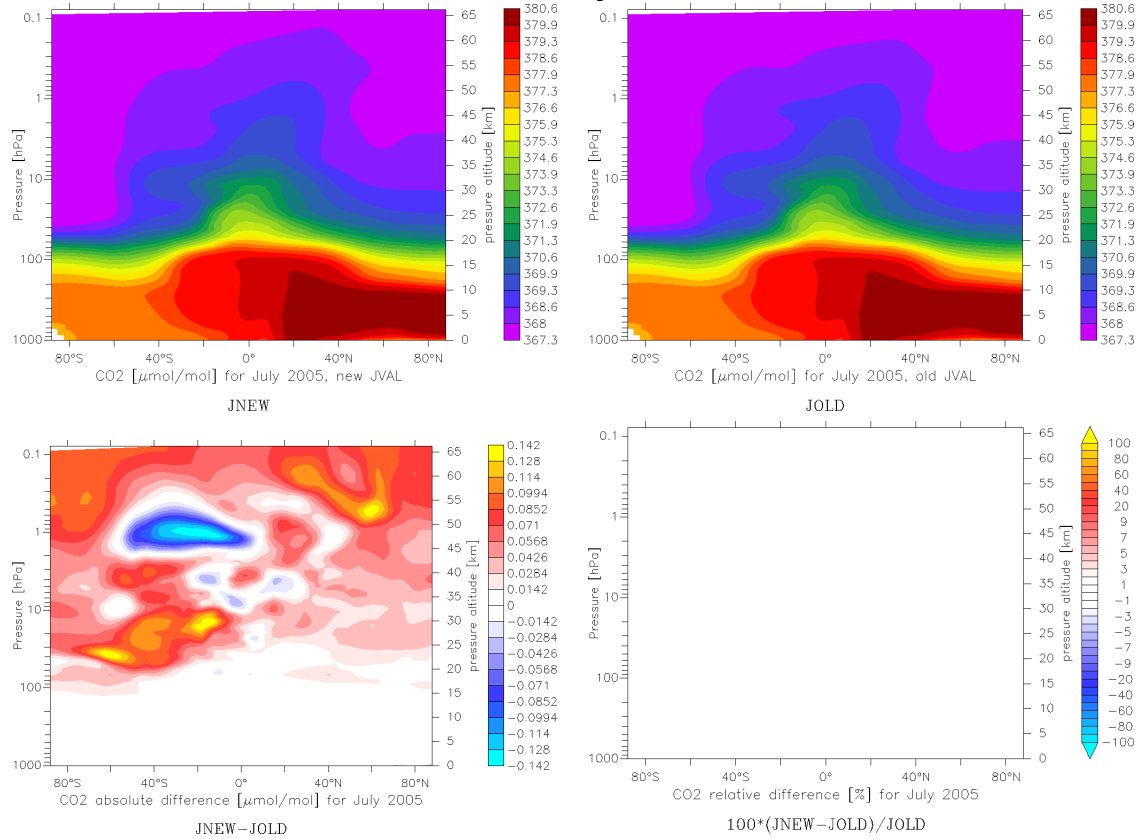

## 4.6 HCHO

— January —

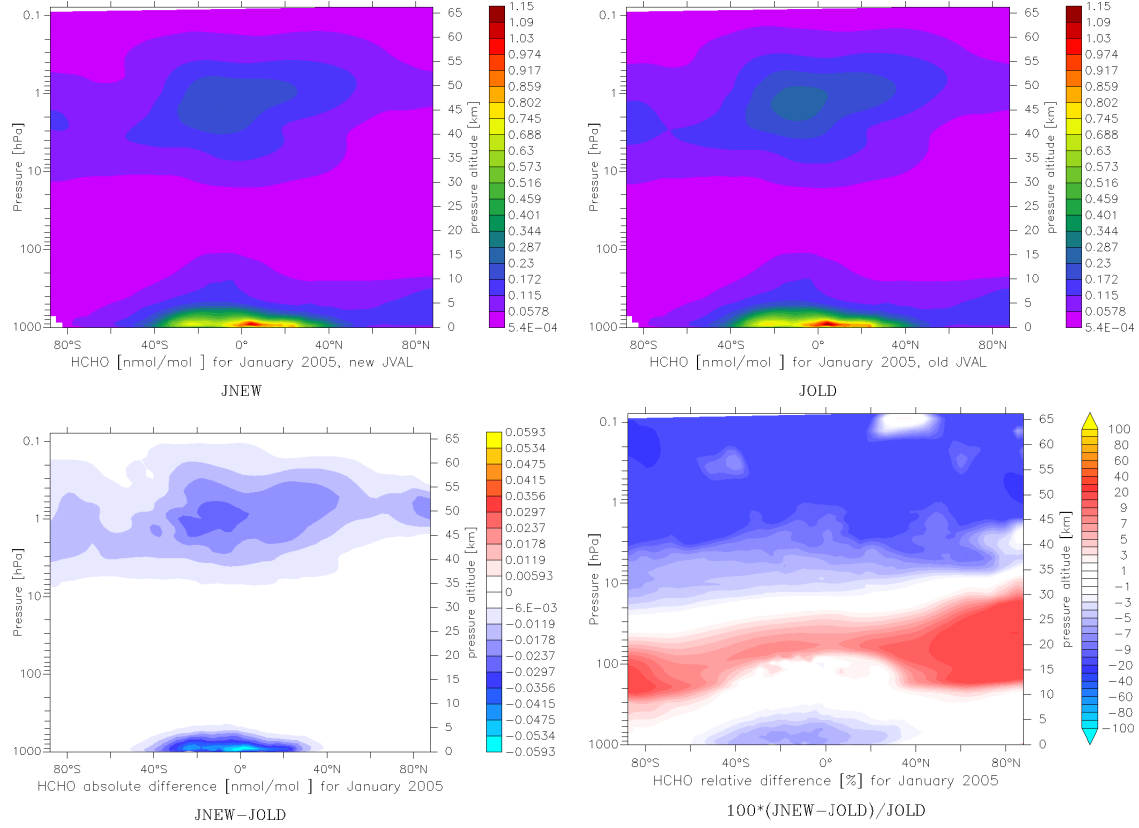

— July —

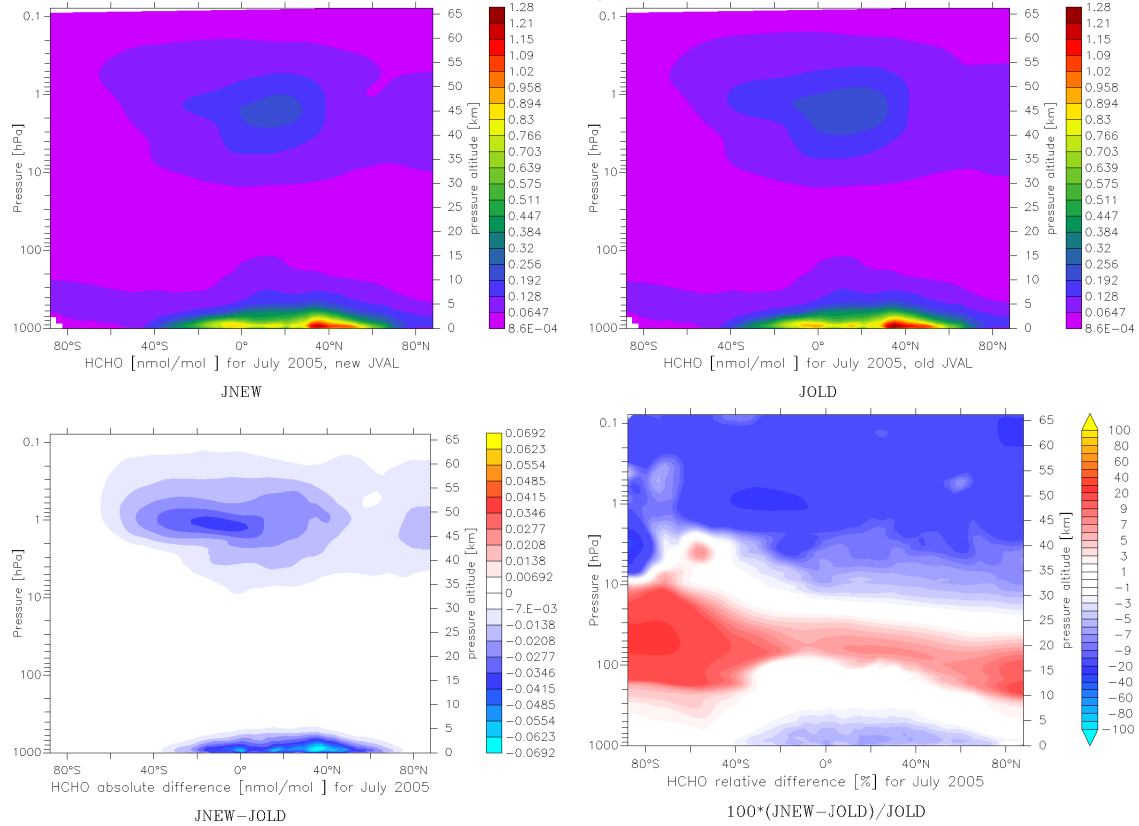

## 4.7 CO

— January —

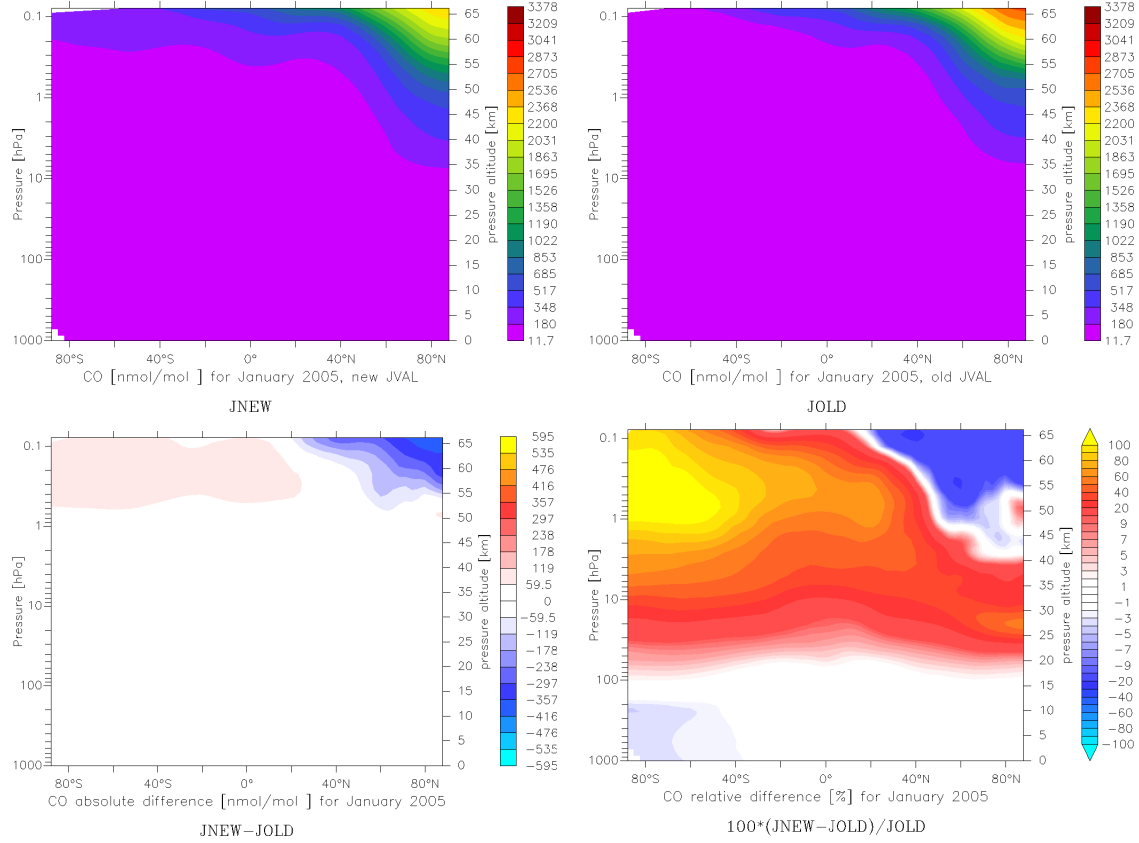

— July —

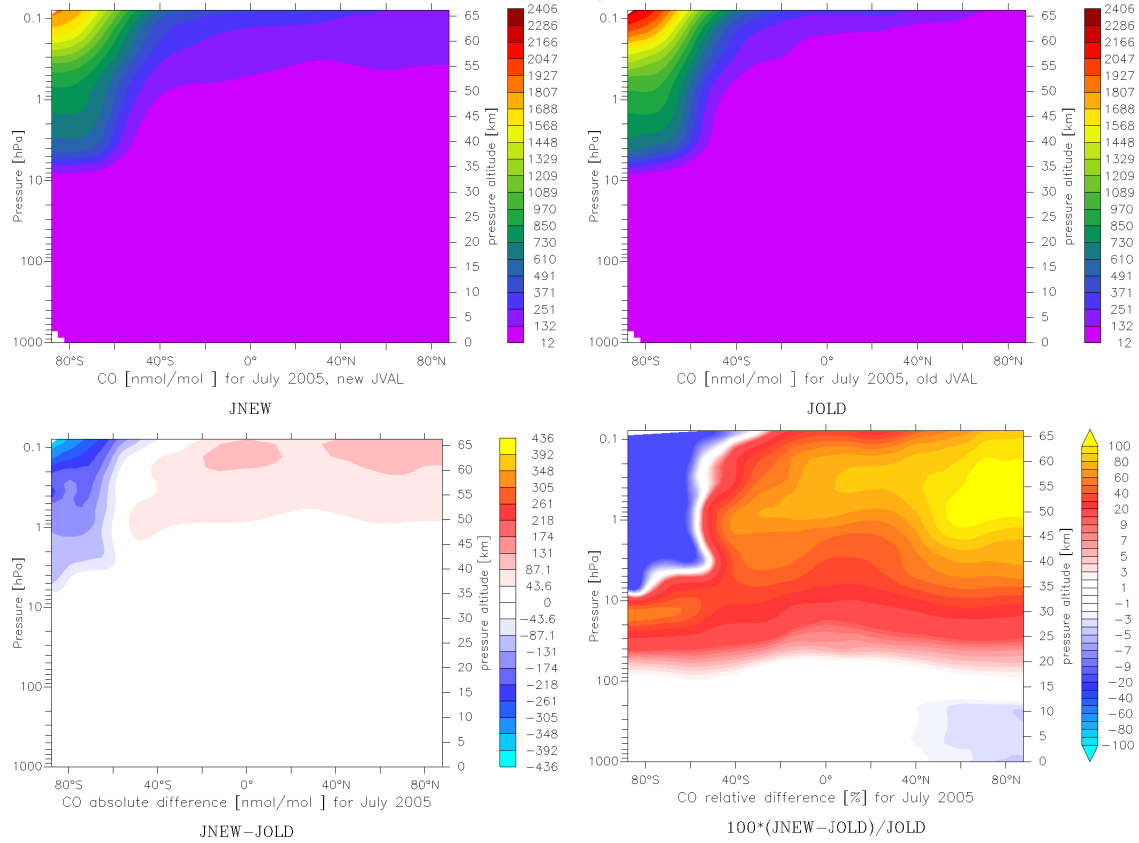

## 4.8 C<sub>2</sub>H<sub>6</sub>

— January —

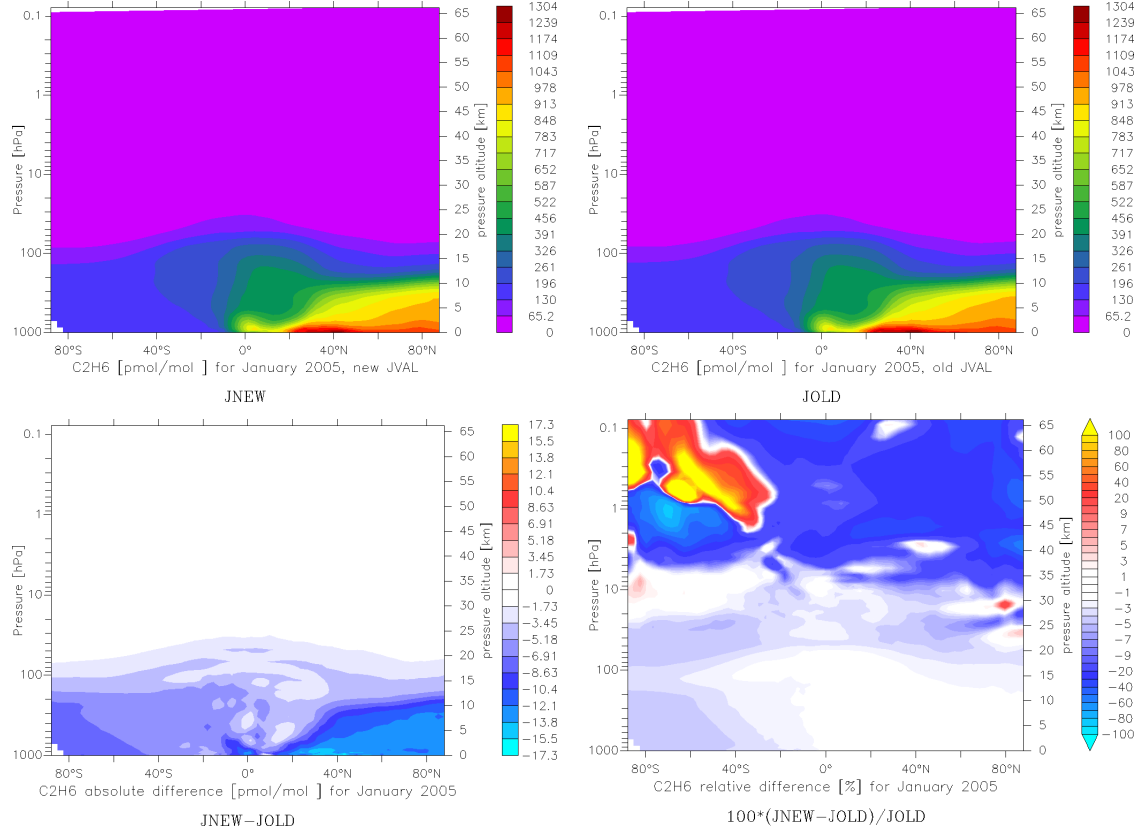

— July —

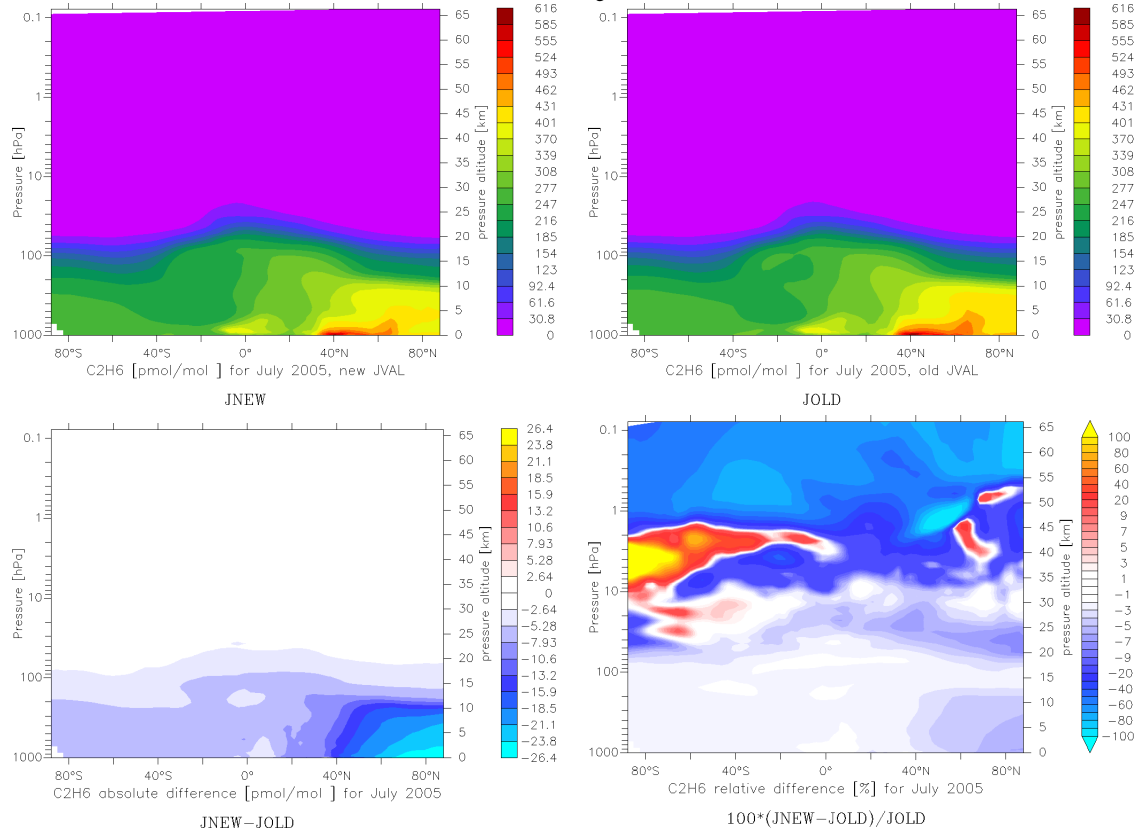

## 4.9 C<sub>2</sub>H<sub>5</sub>O<sub>2</sub>

— January —

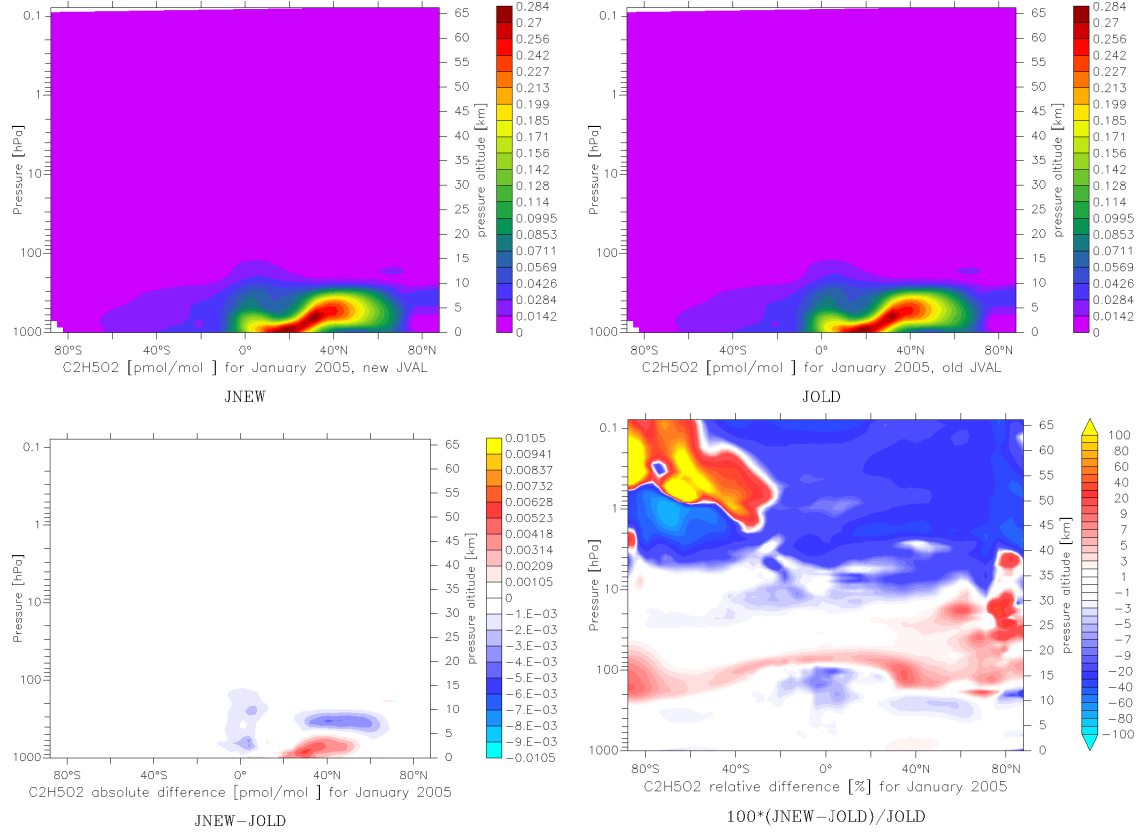

— July —

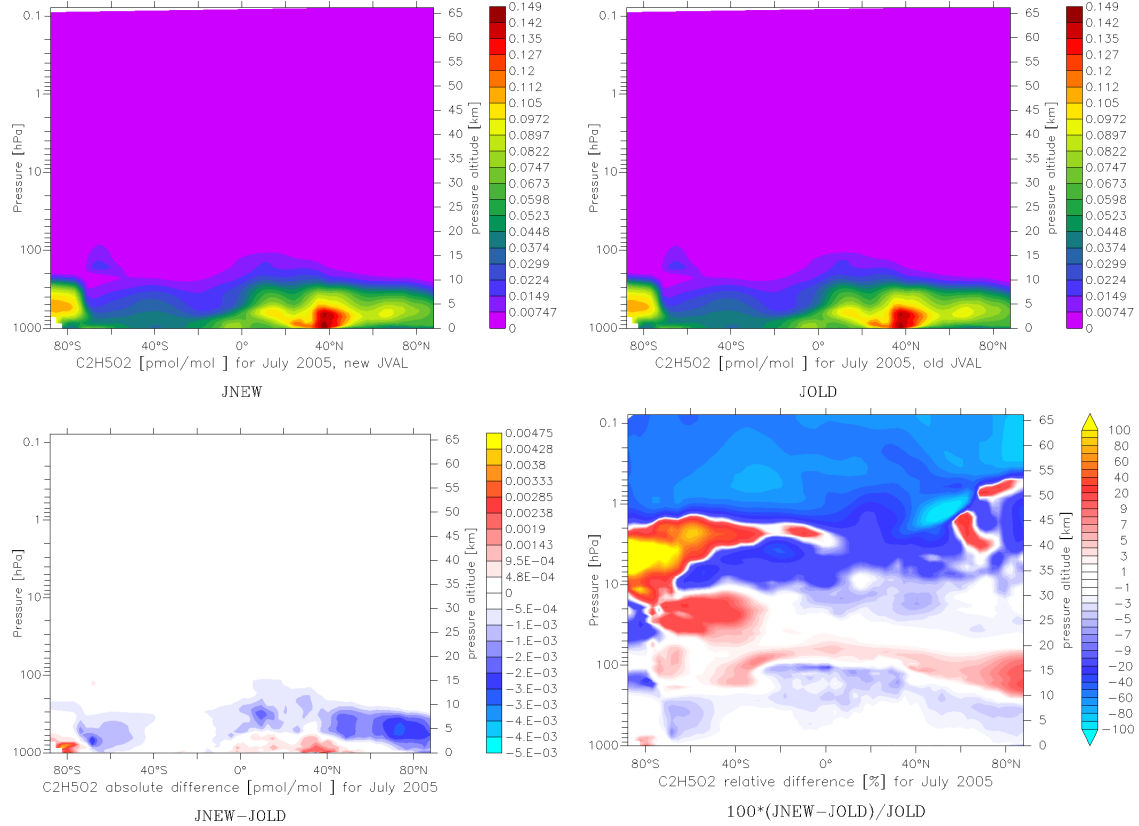

## 4.10 PAN

— January —

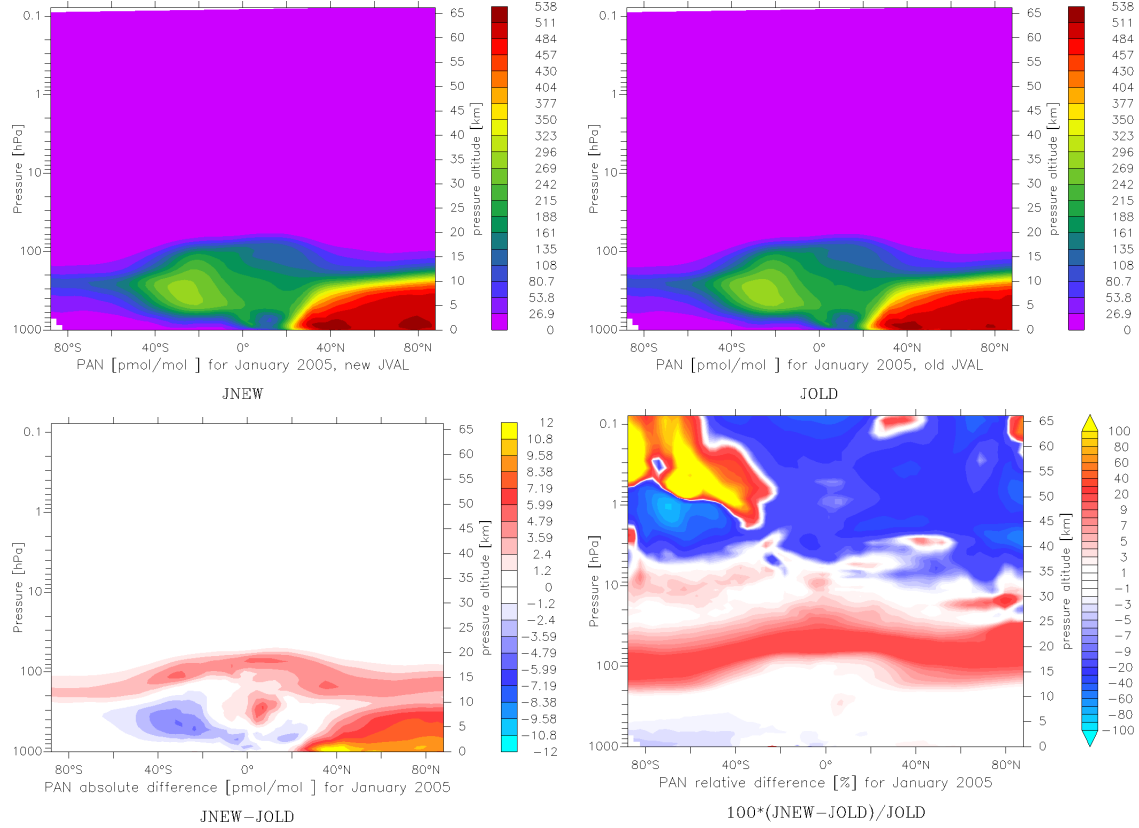

— July —

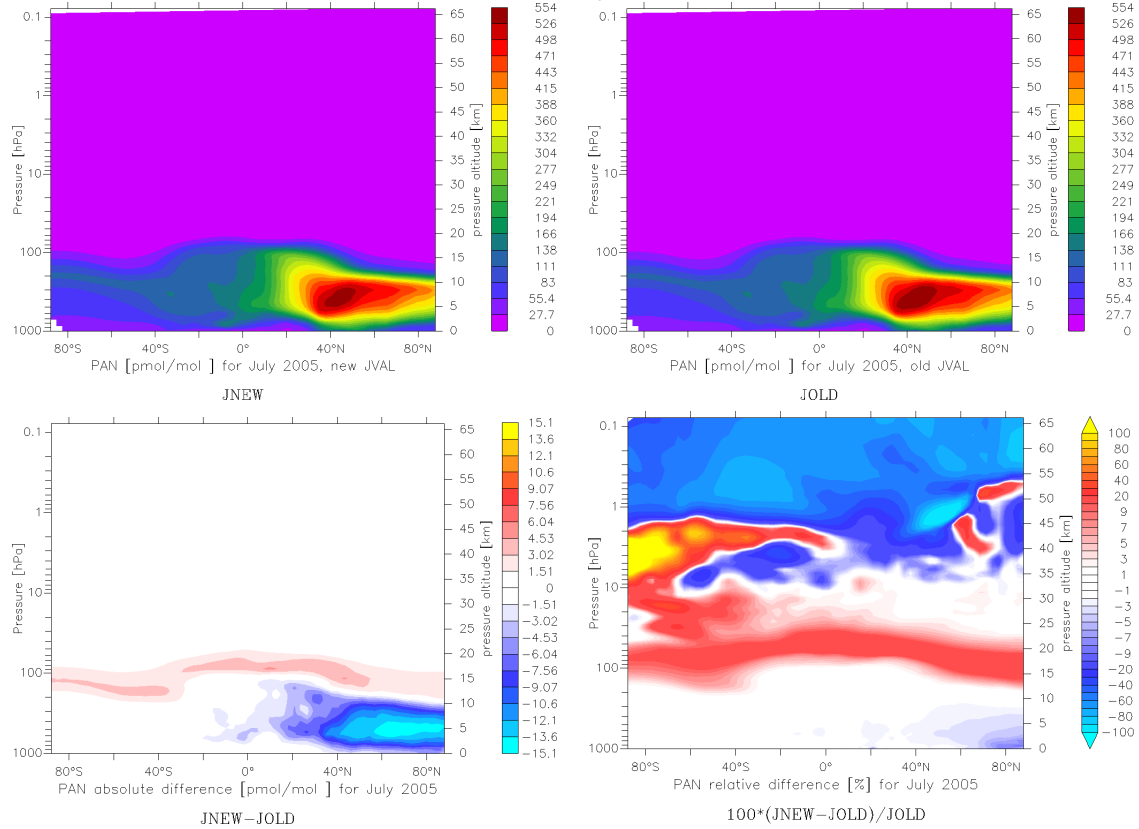

# 5 Chlorine compounds

## 5.1 Cl<sub>2</sub>

— January —

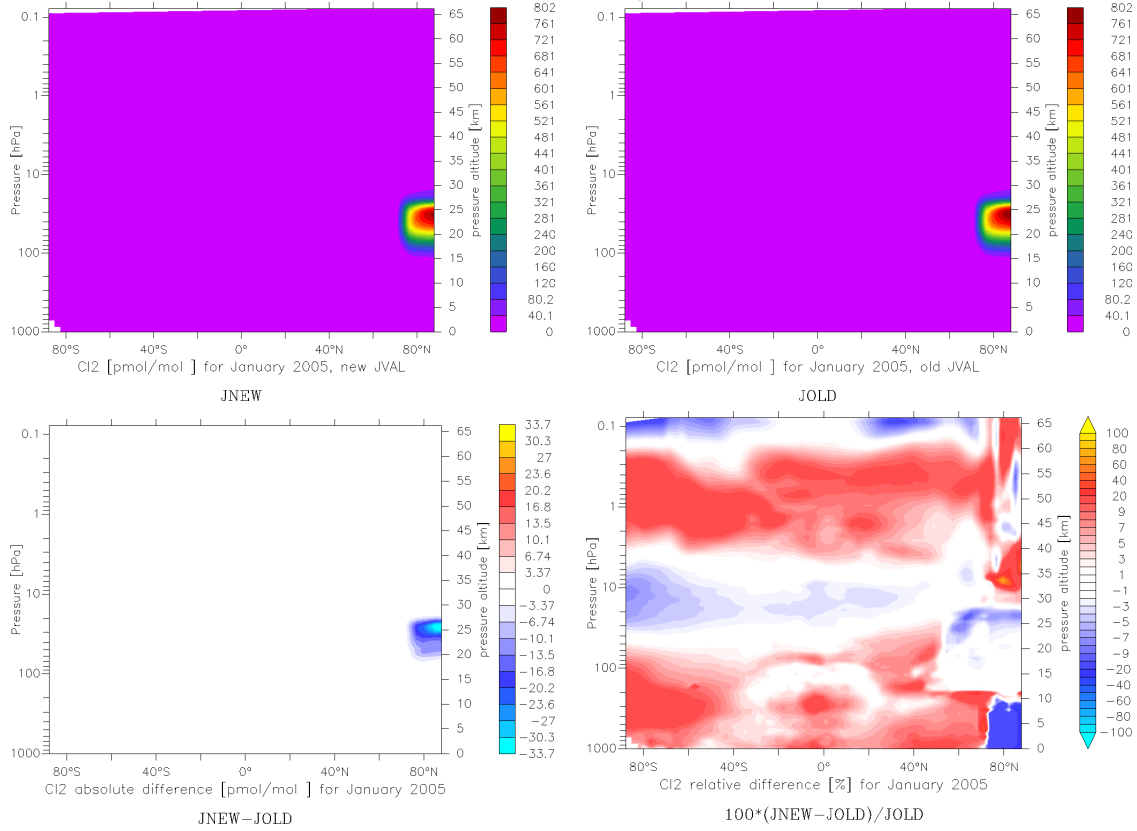

— July —

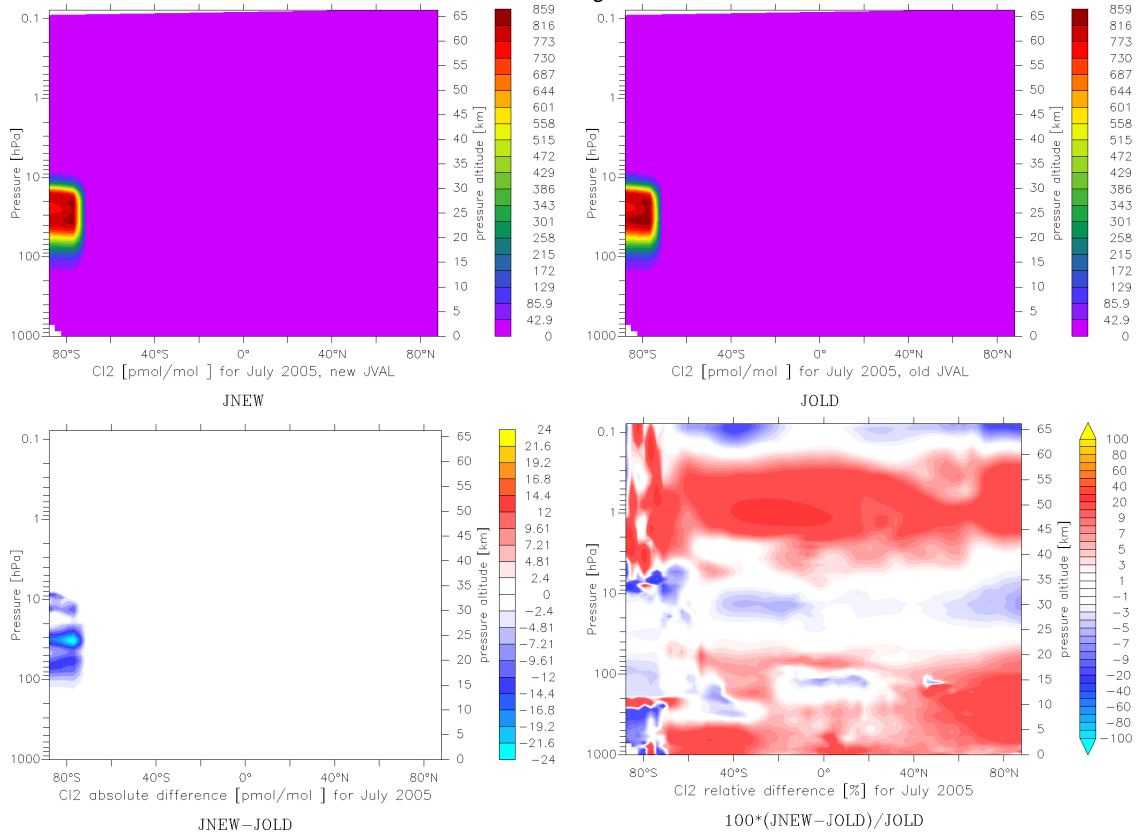

## 5.2 ClO

— January —

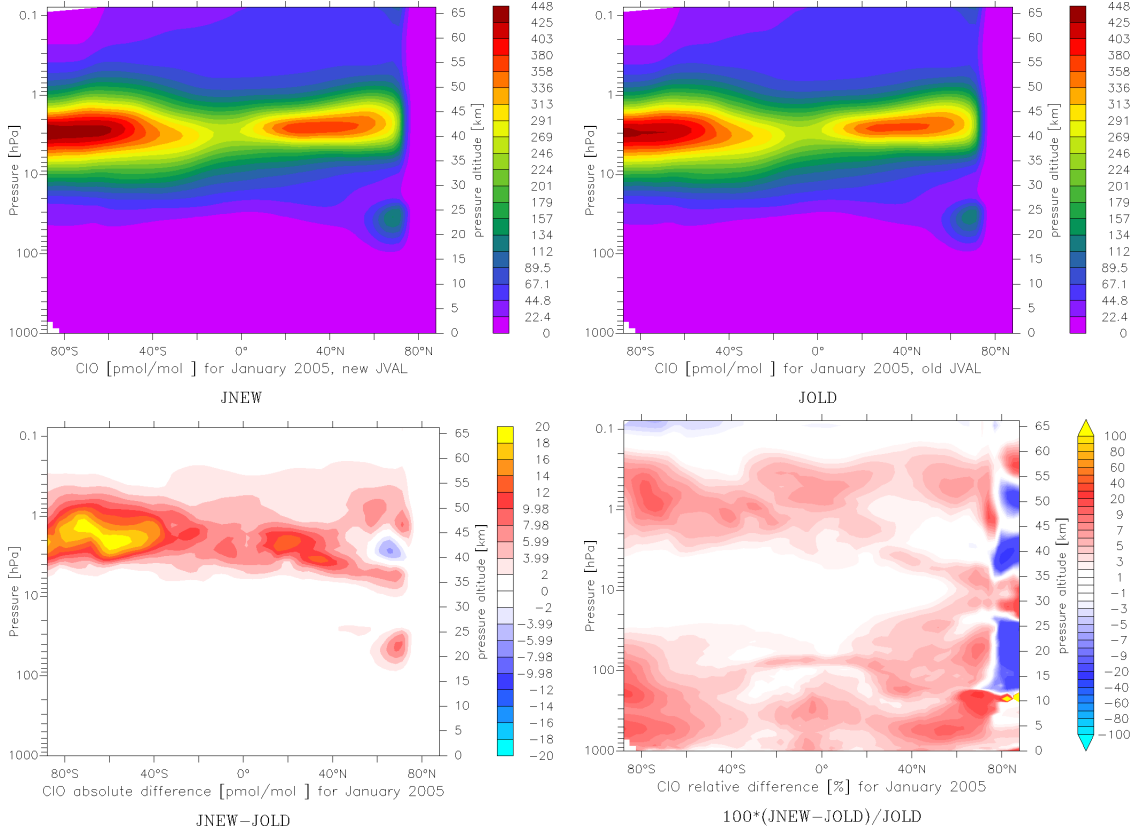

— July —

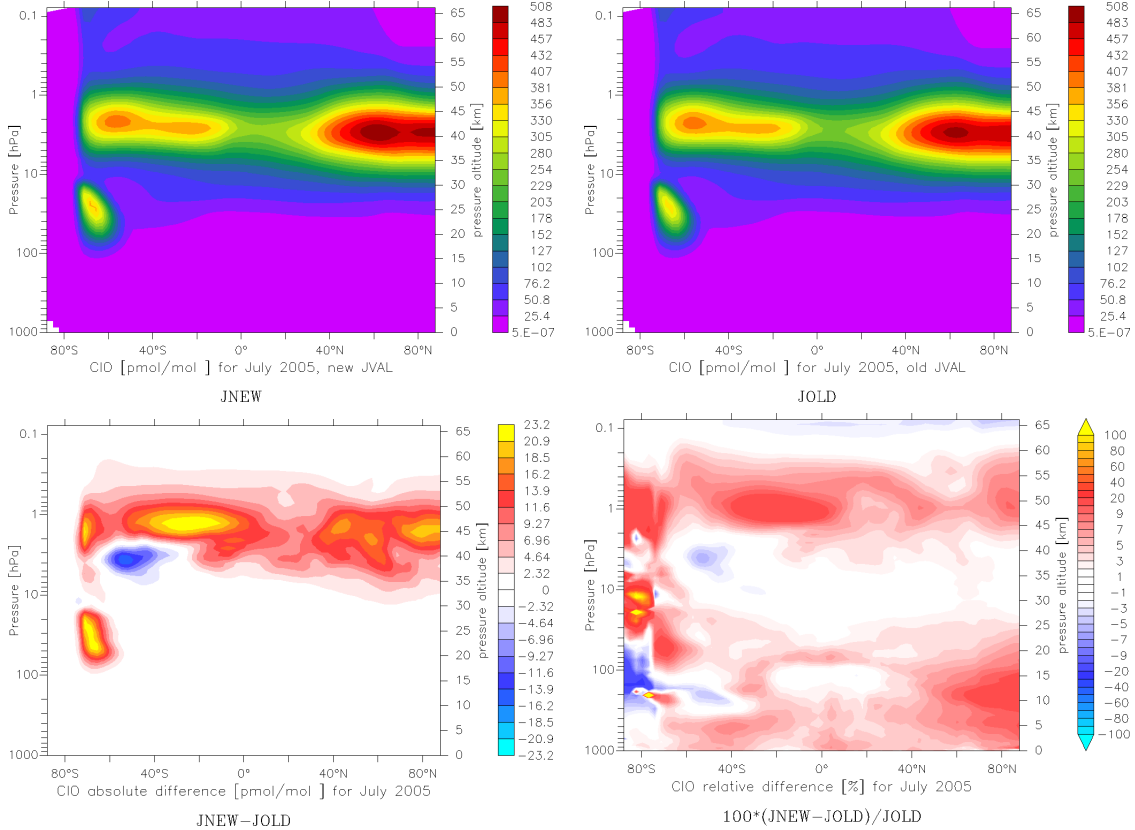



## 5.3 Cl<sub>2</sub>O<sub>2</sub>

— January —

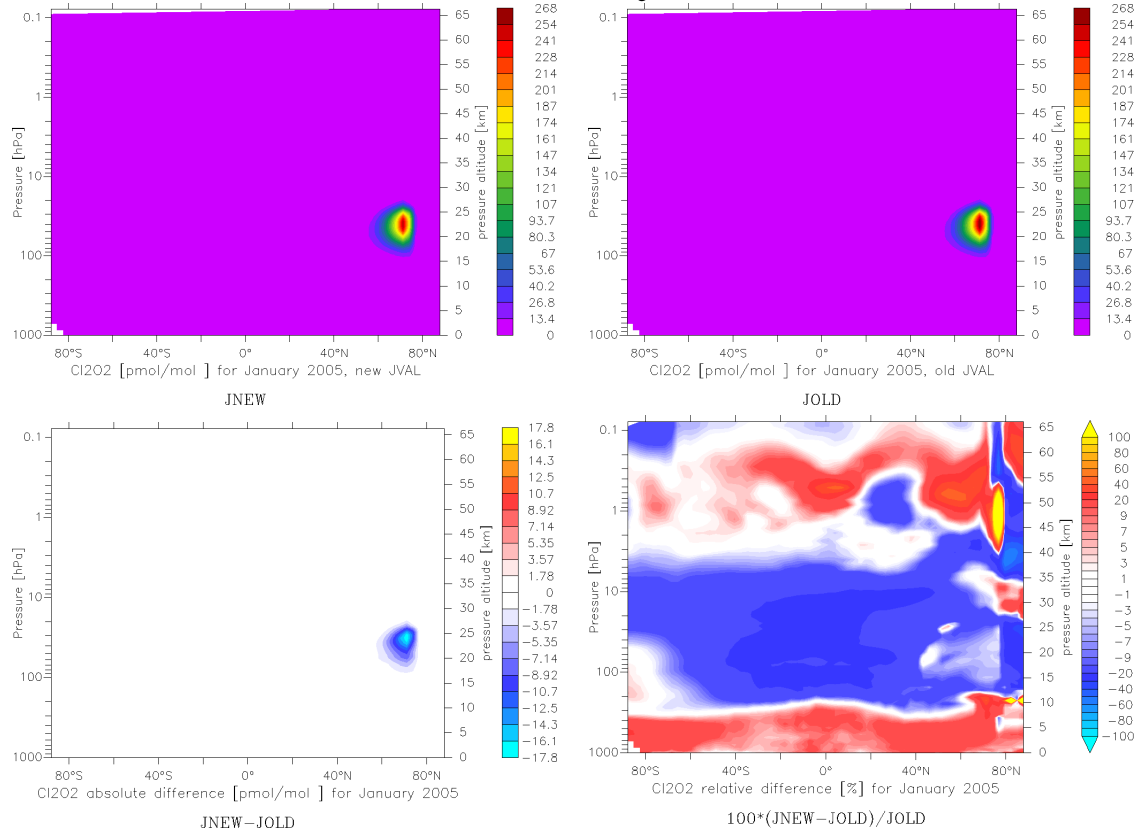

— July —

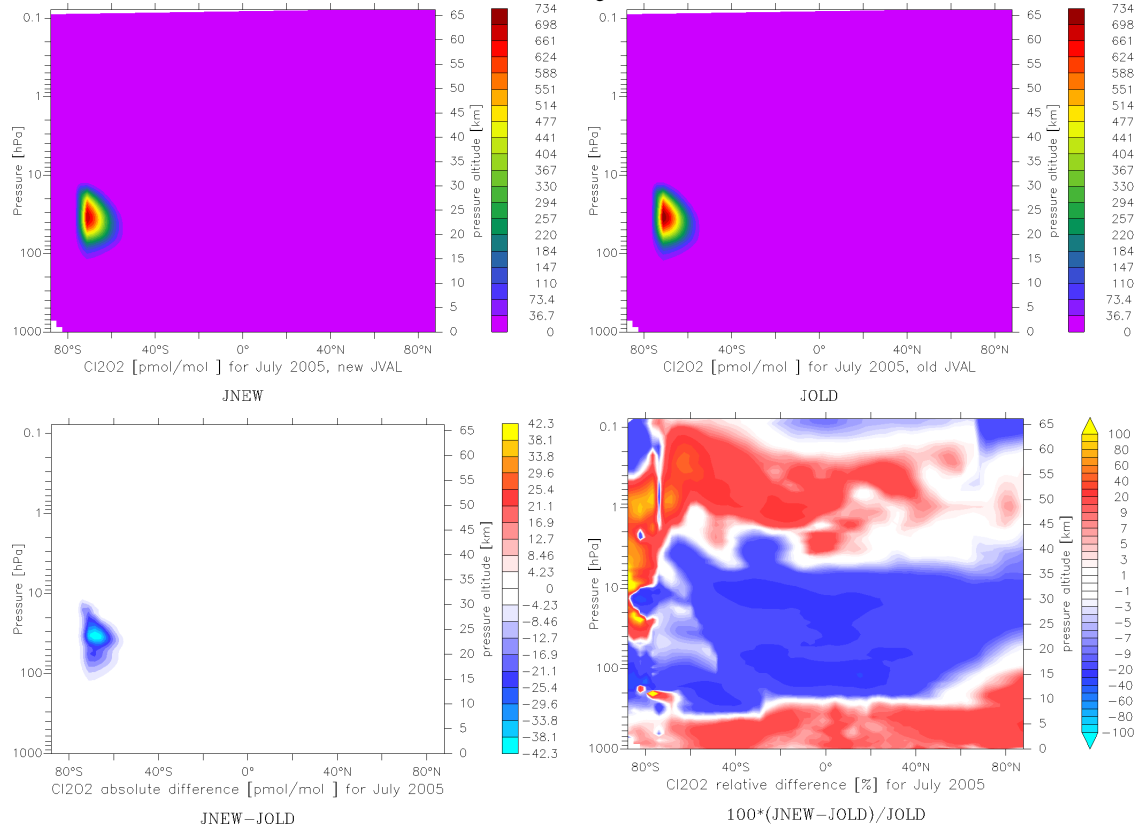

## 5.4 HCl

— January —

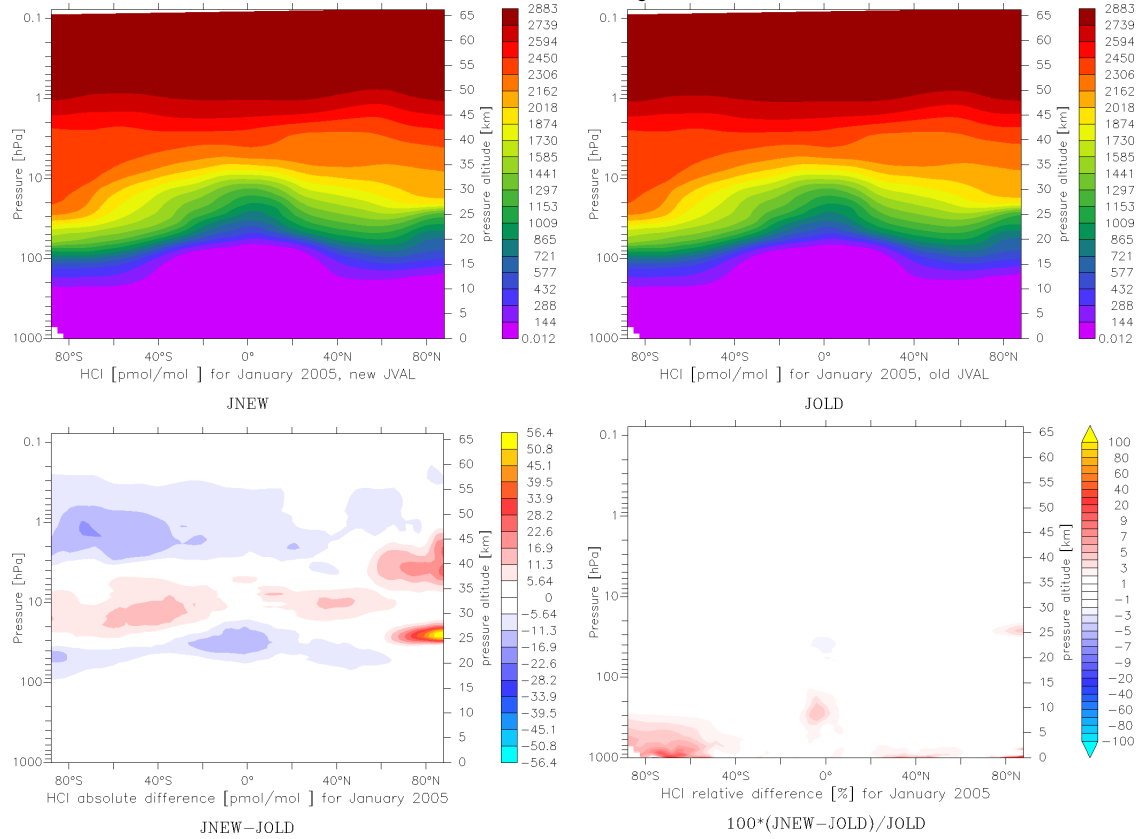

— July —

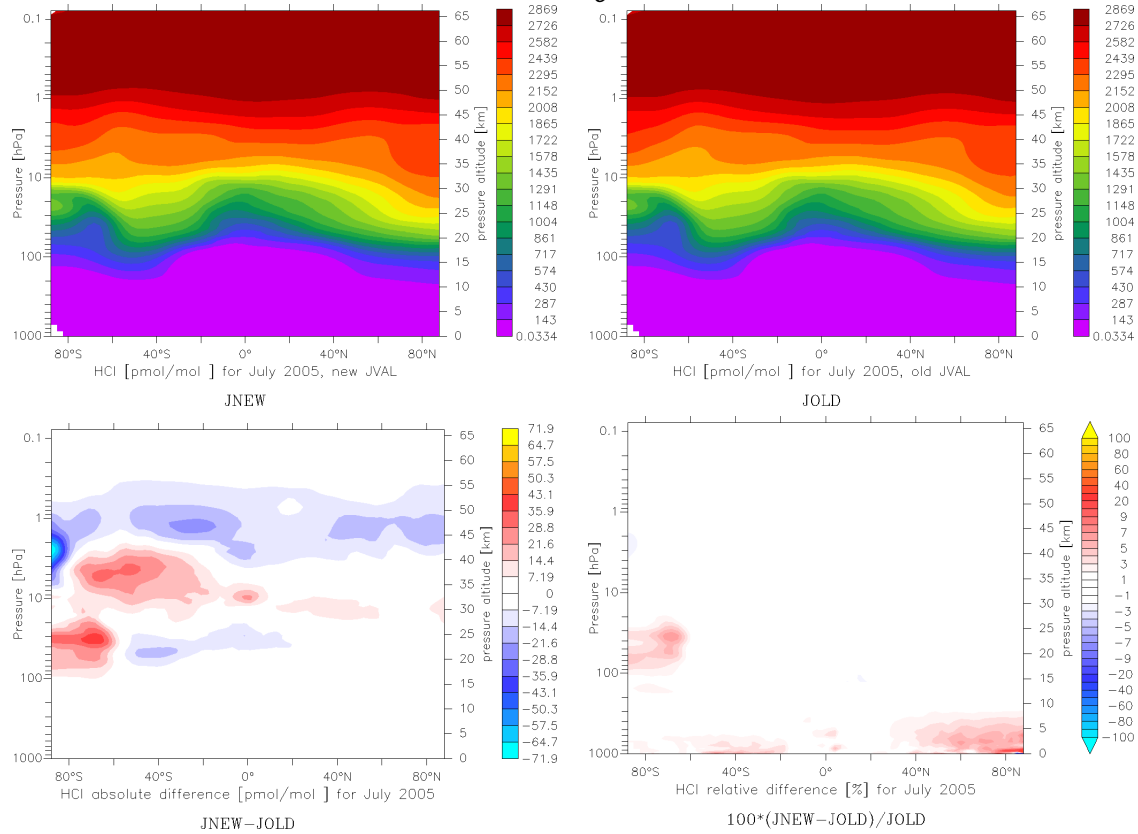

## 5.5 HOCl

— January —

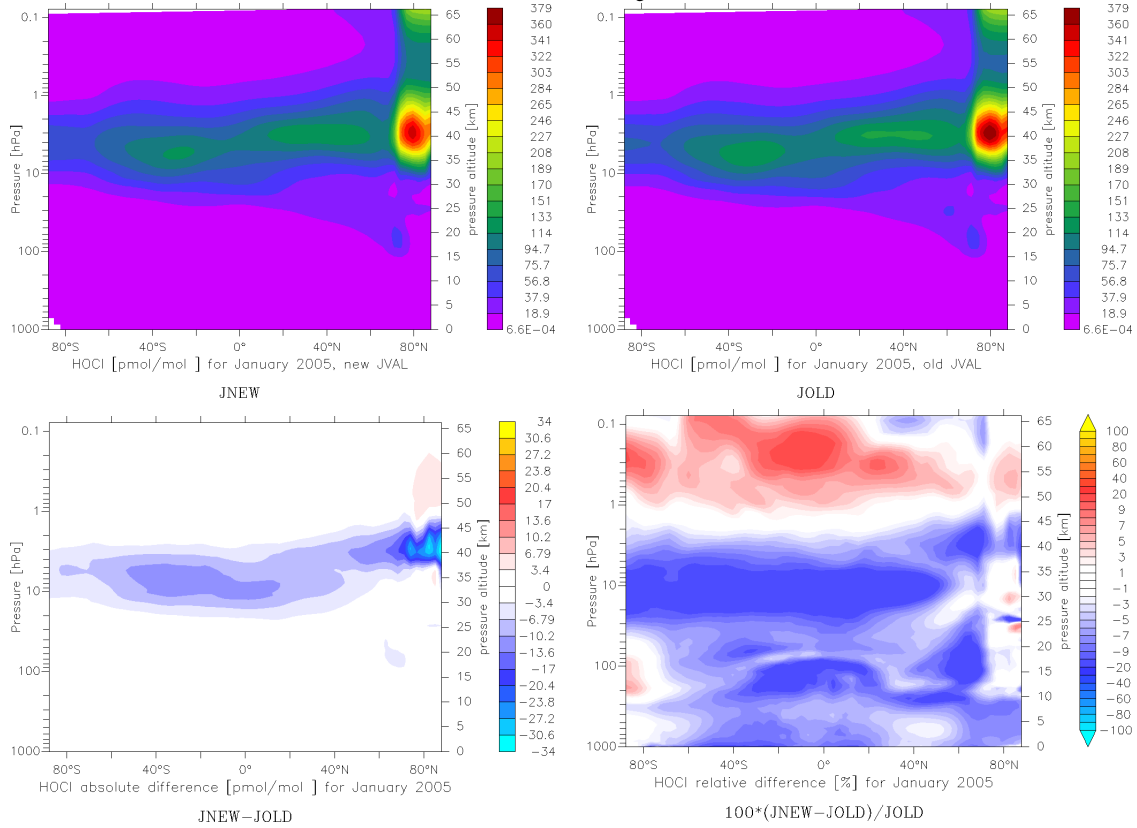

— July —

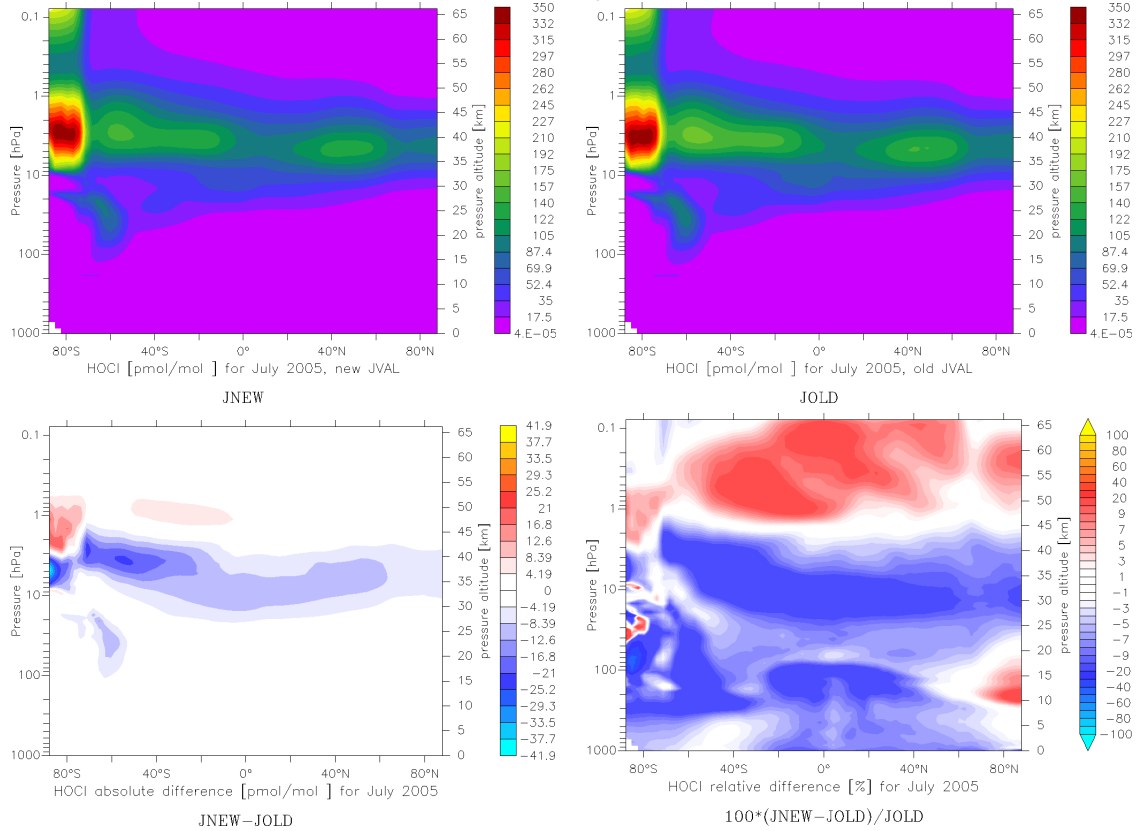

## 5.6 OCIO

— January —

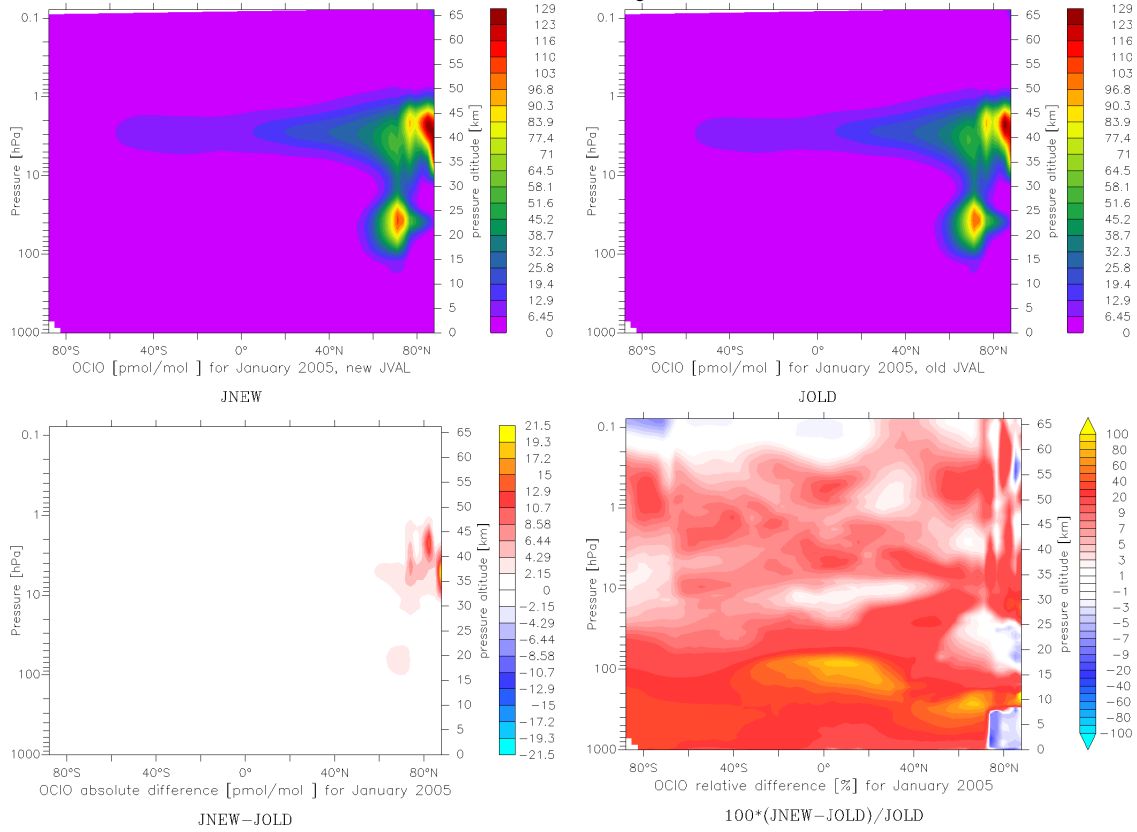

— July —

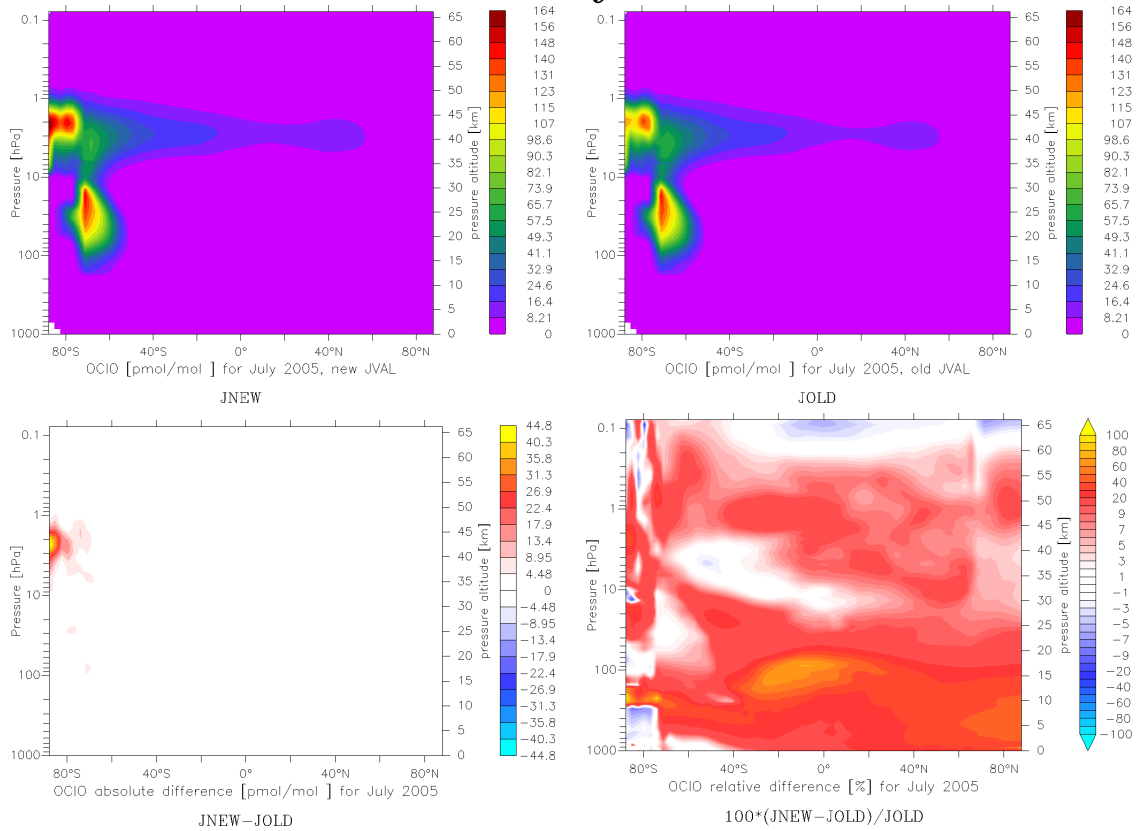

## 5.7 ClNO<sub>3</sub>

— January —

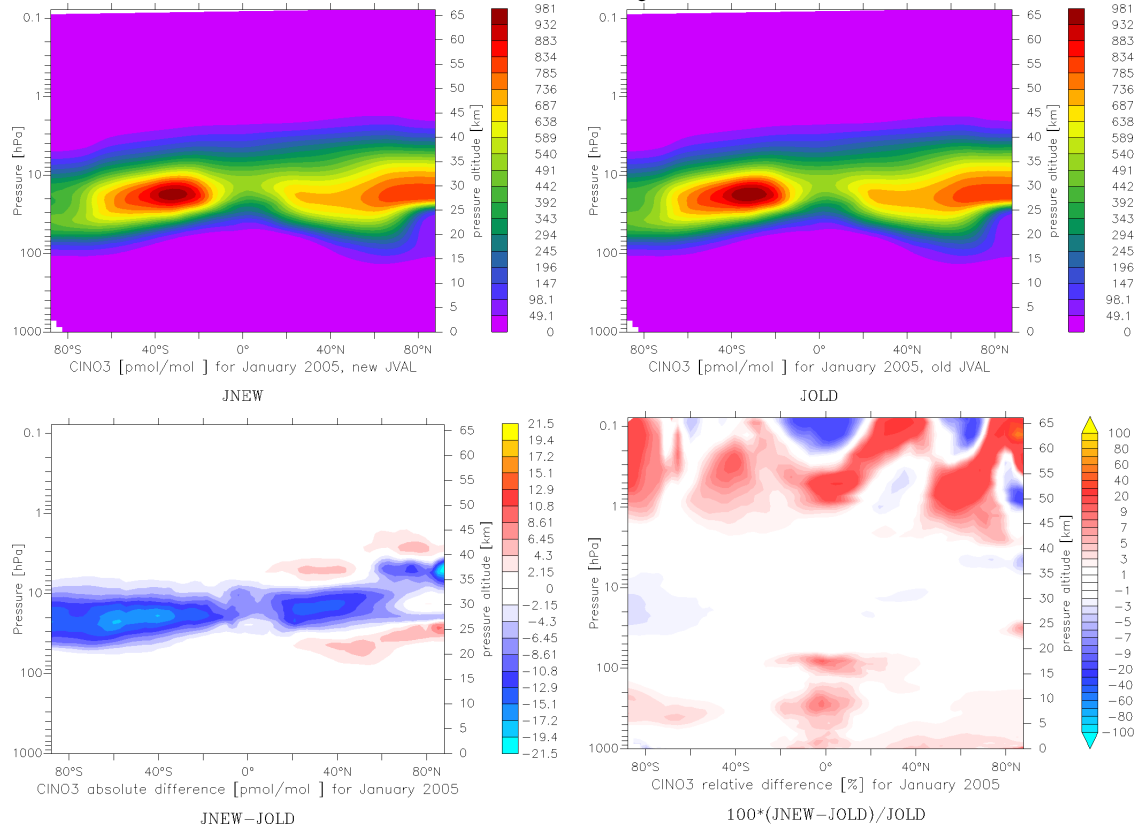

— July —

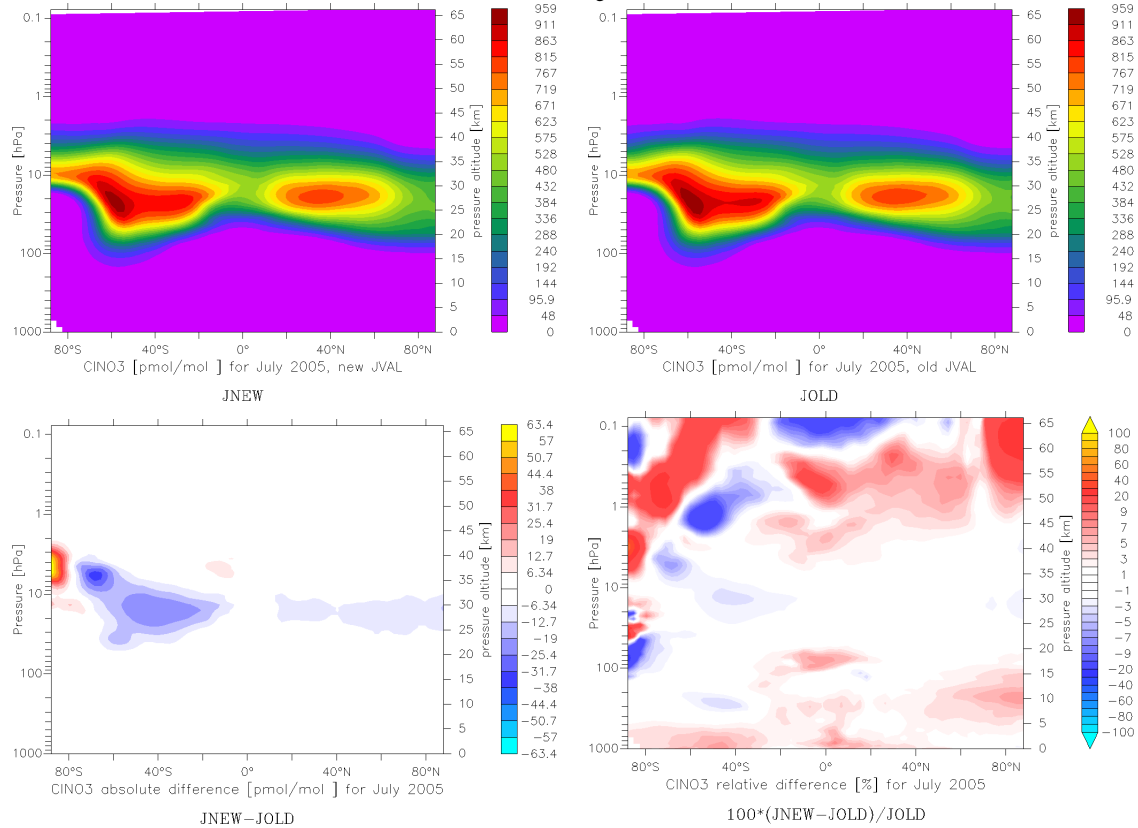

## 5.8 ClO<sub>x</sub>

— January —

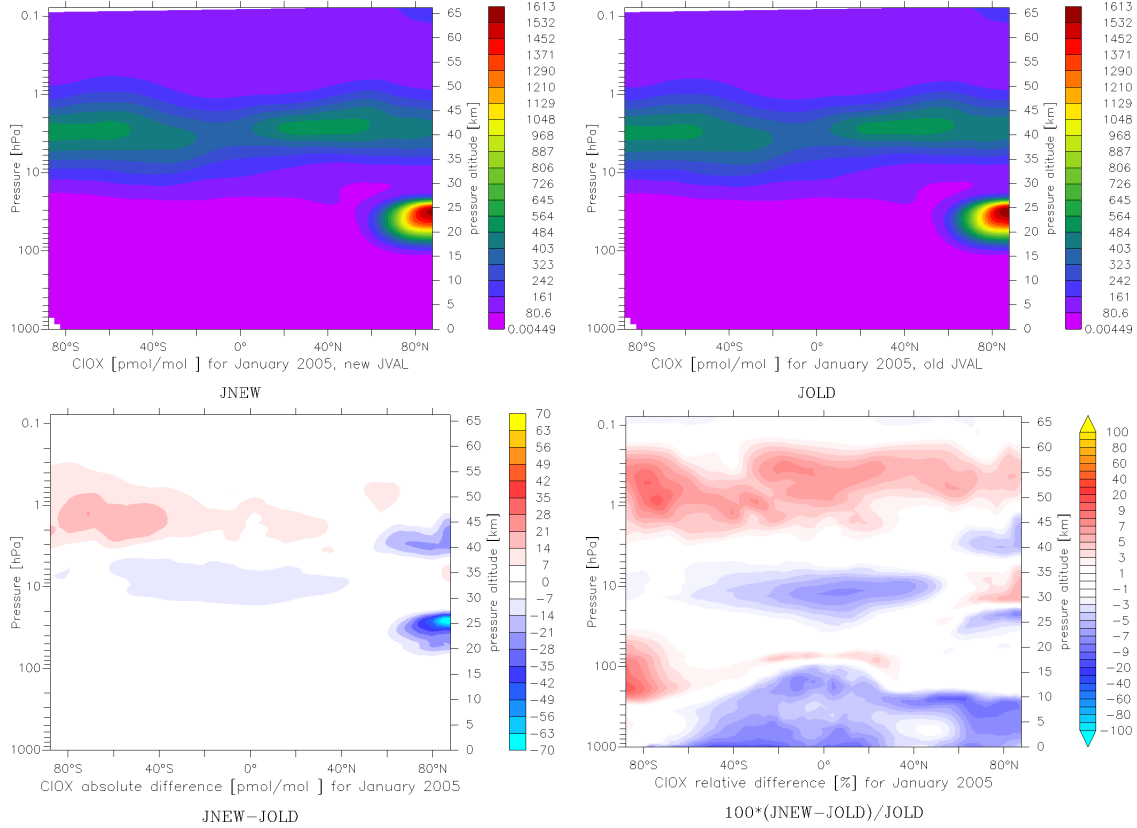

— July —

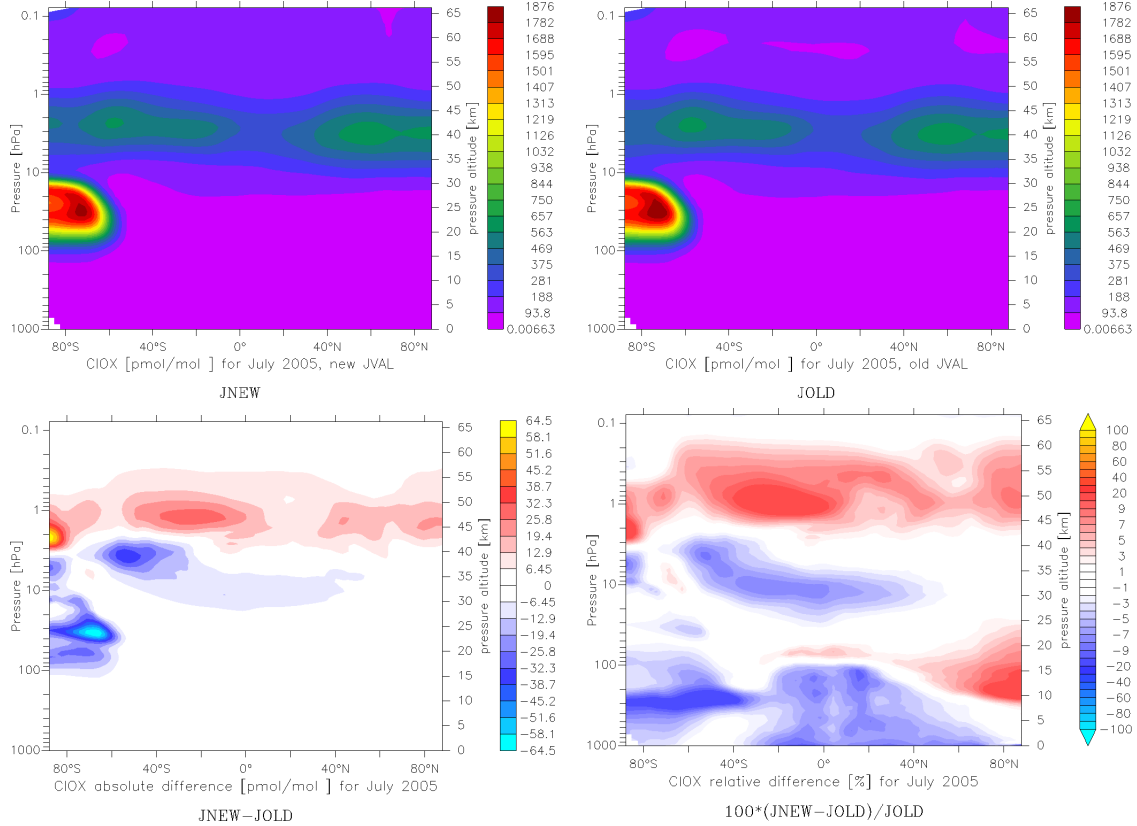

## 5.9 CFC1<sub>3</sub>

— January —

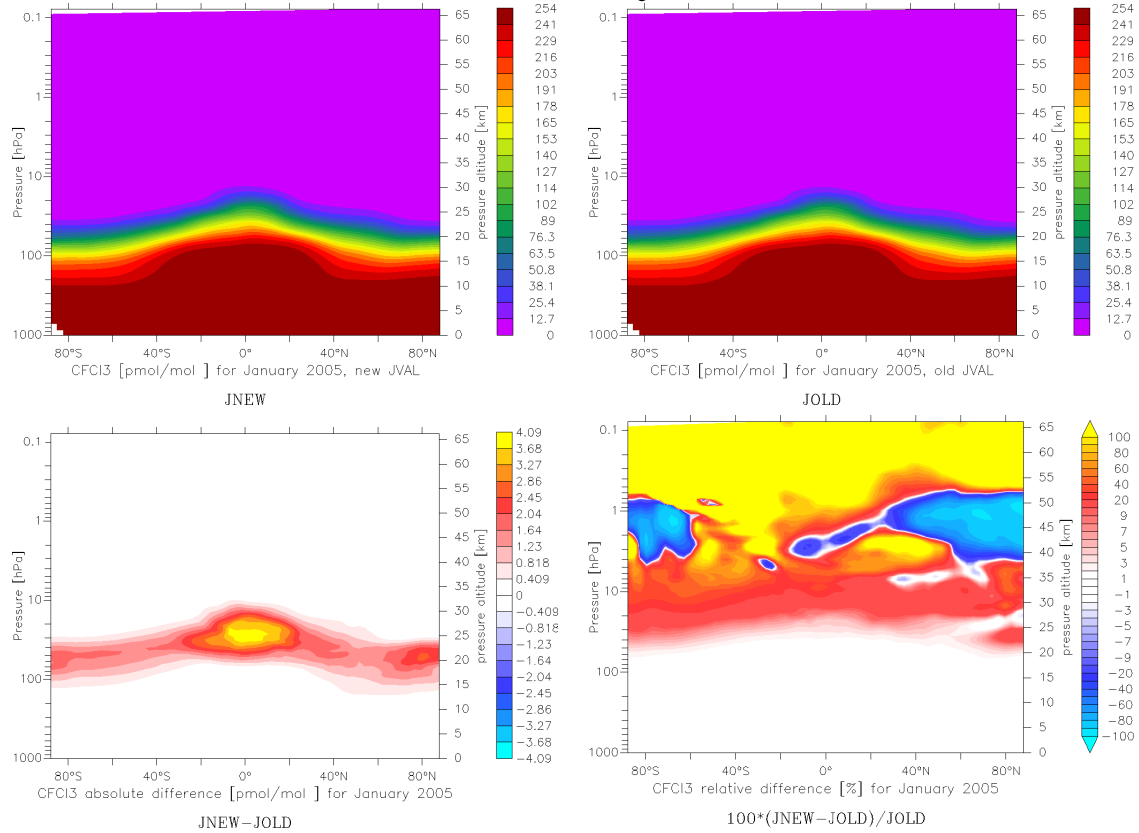

— July —

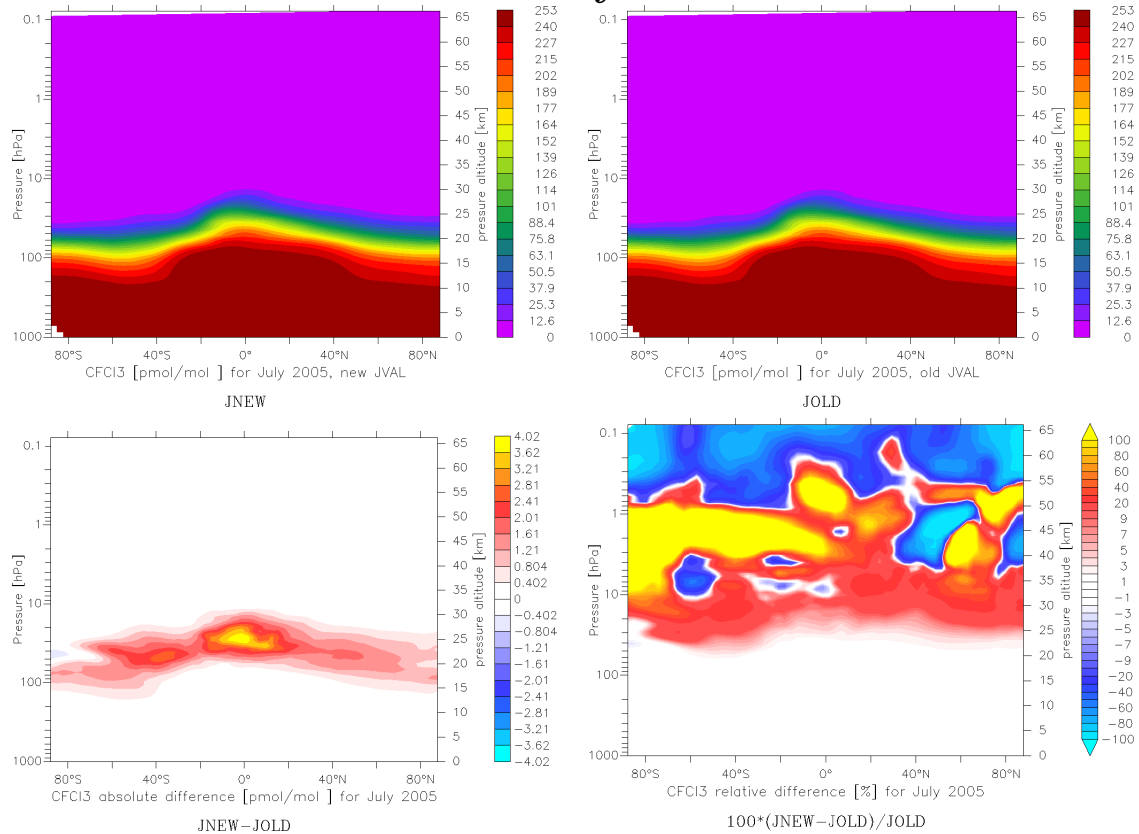

## 5.10 CF<sub>2</sub>Cl<sub>2</sub>

— January —

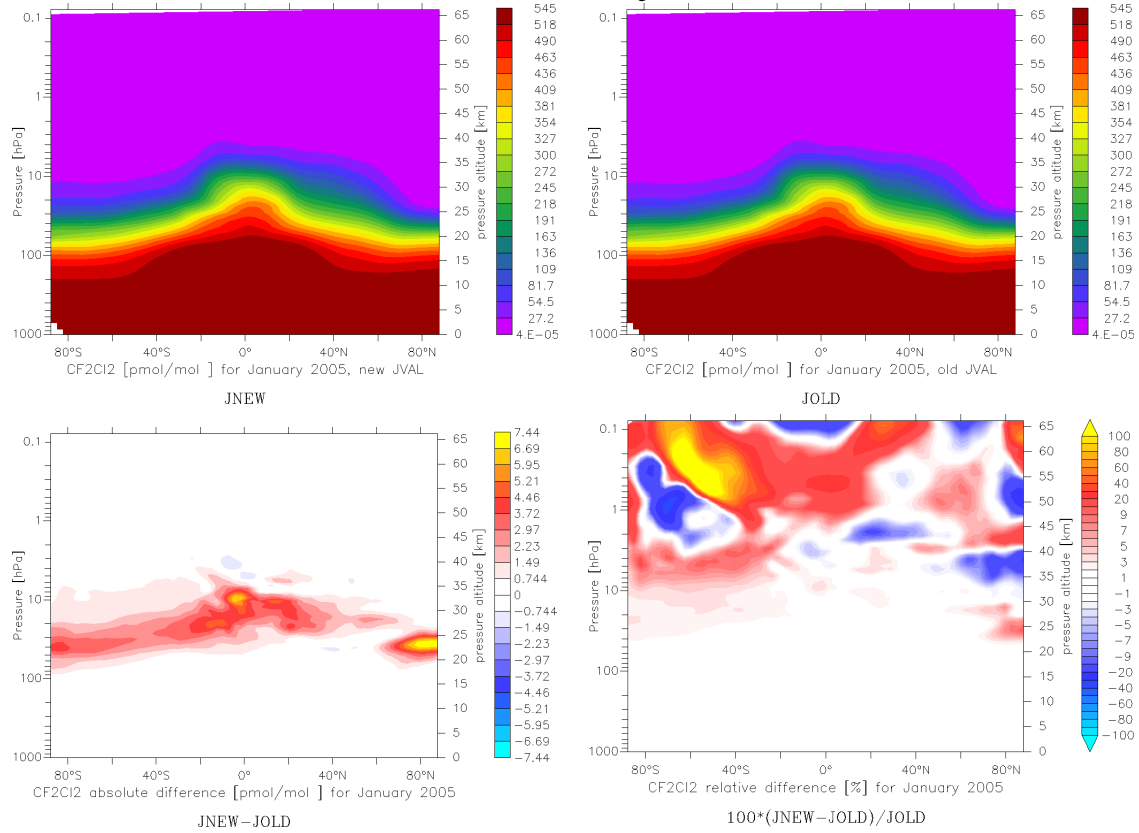

— July —

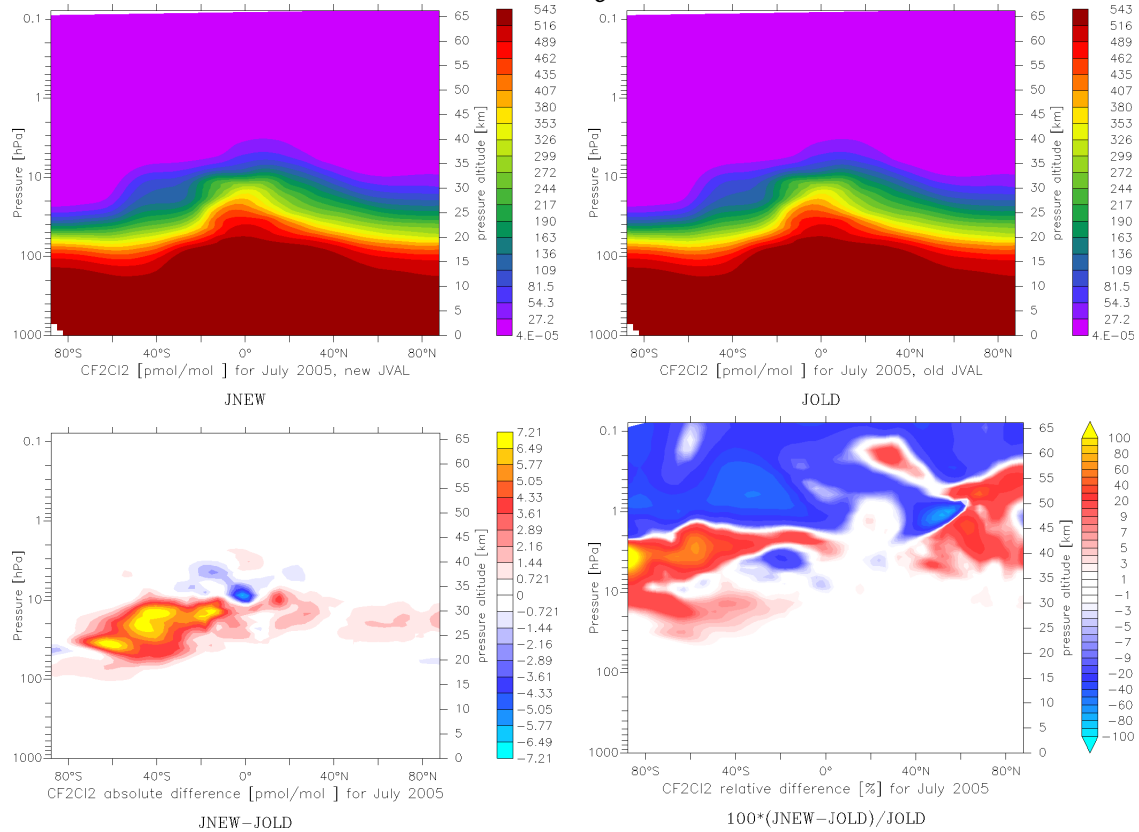



## 5.11 CCl<sub>4</sub>

— January —

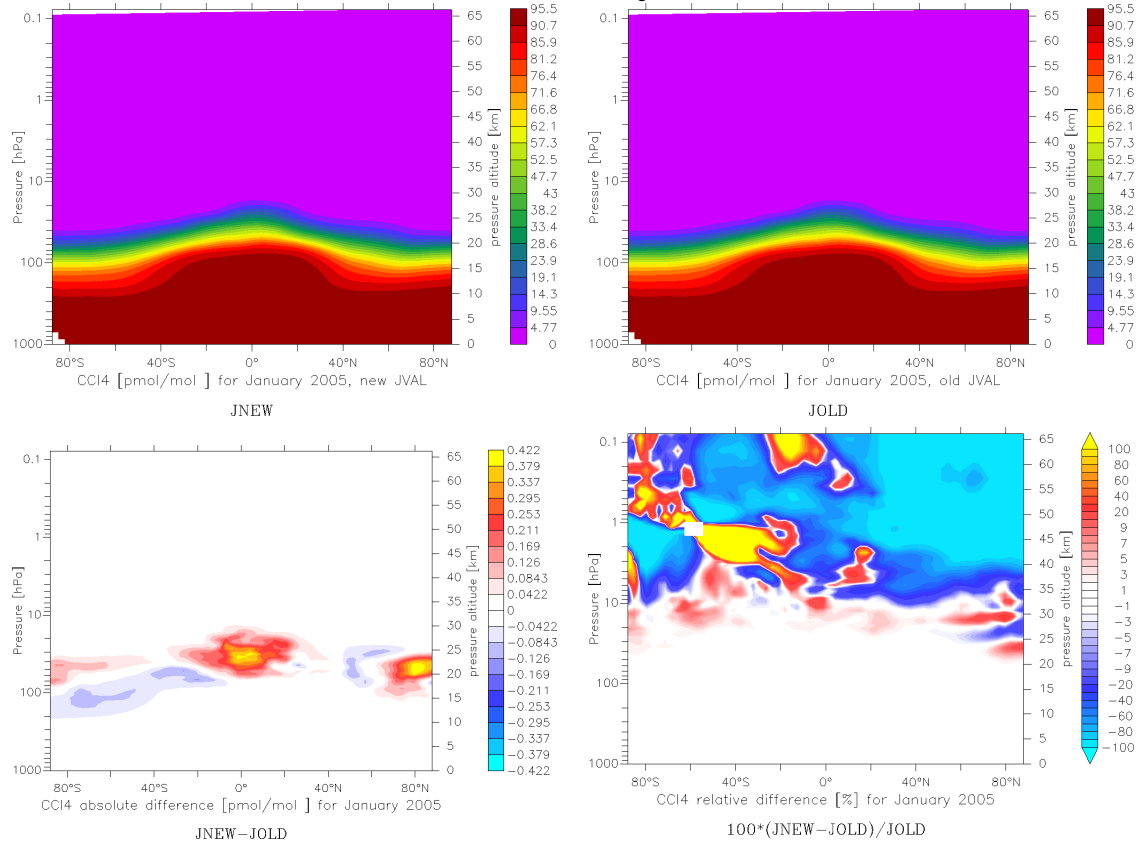

— July —

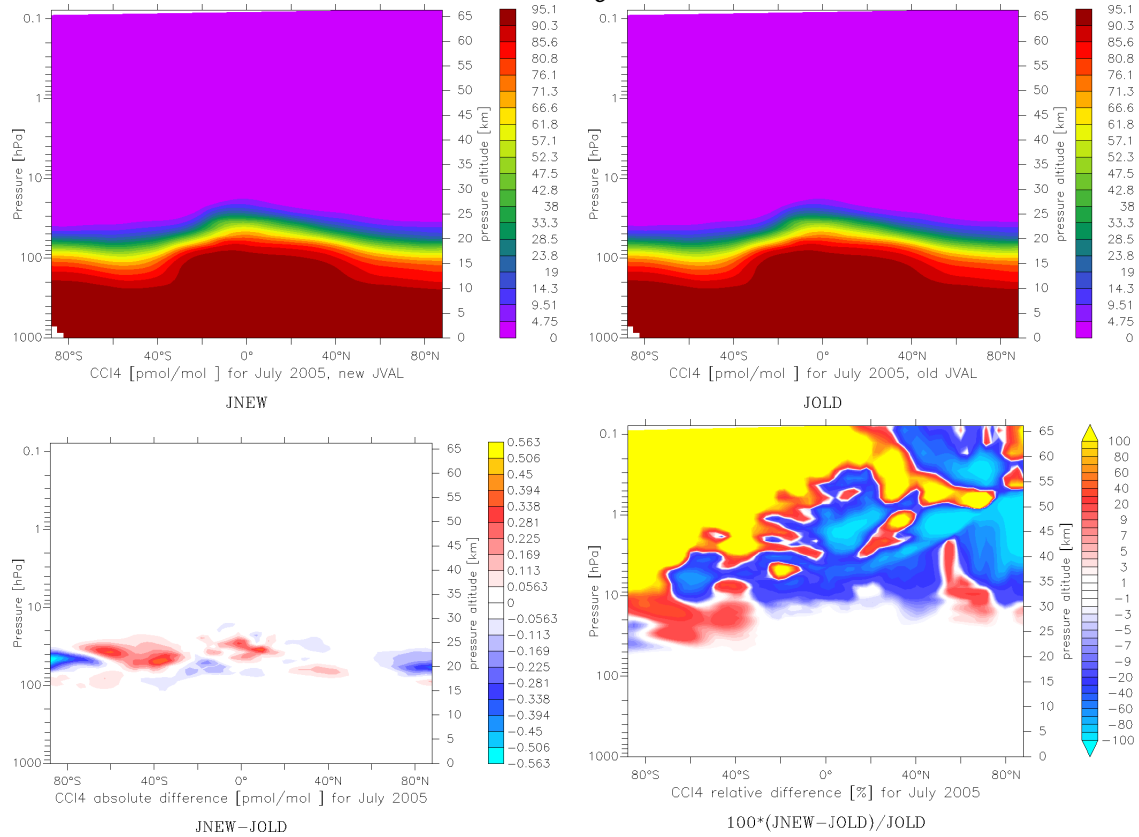

## 5.12 CH<sub>3</sub>CCl<sub>3</sub>

— January —

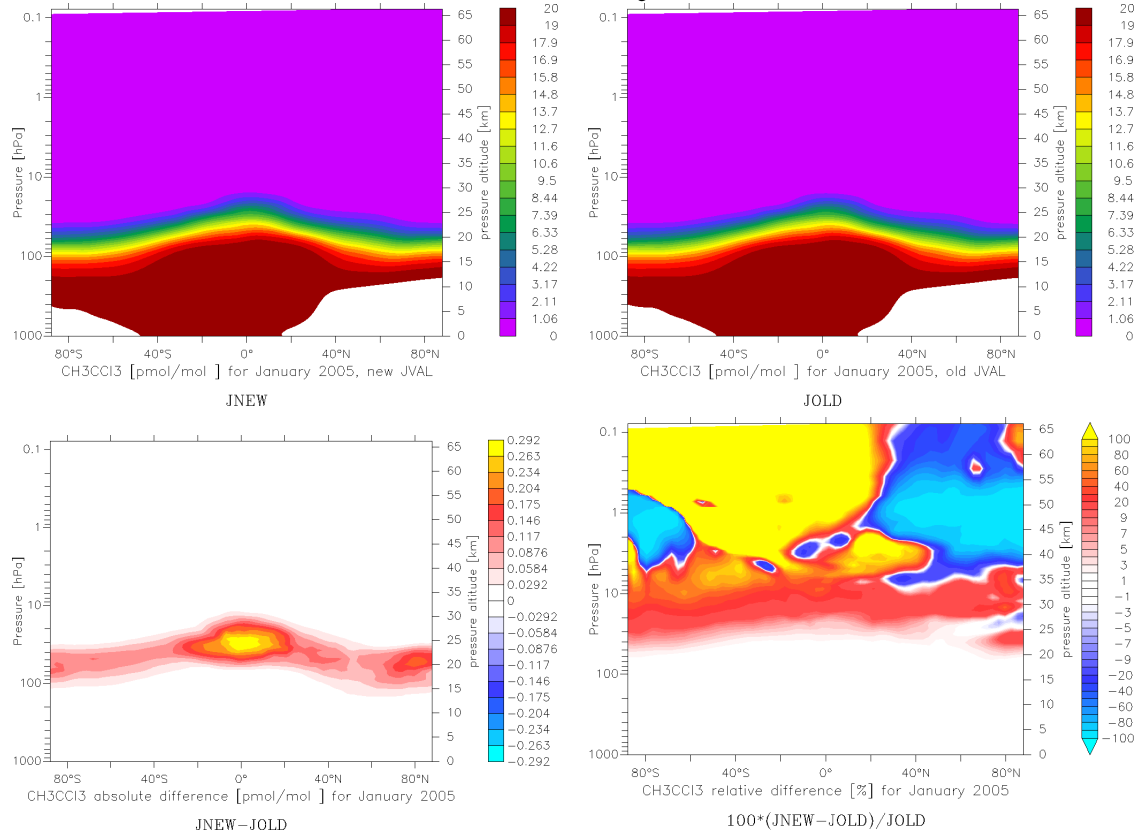

— July —

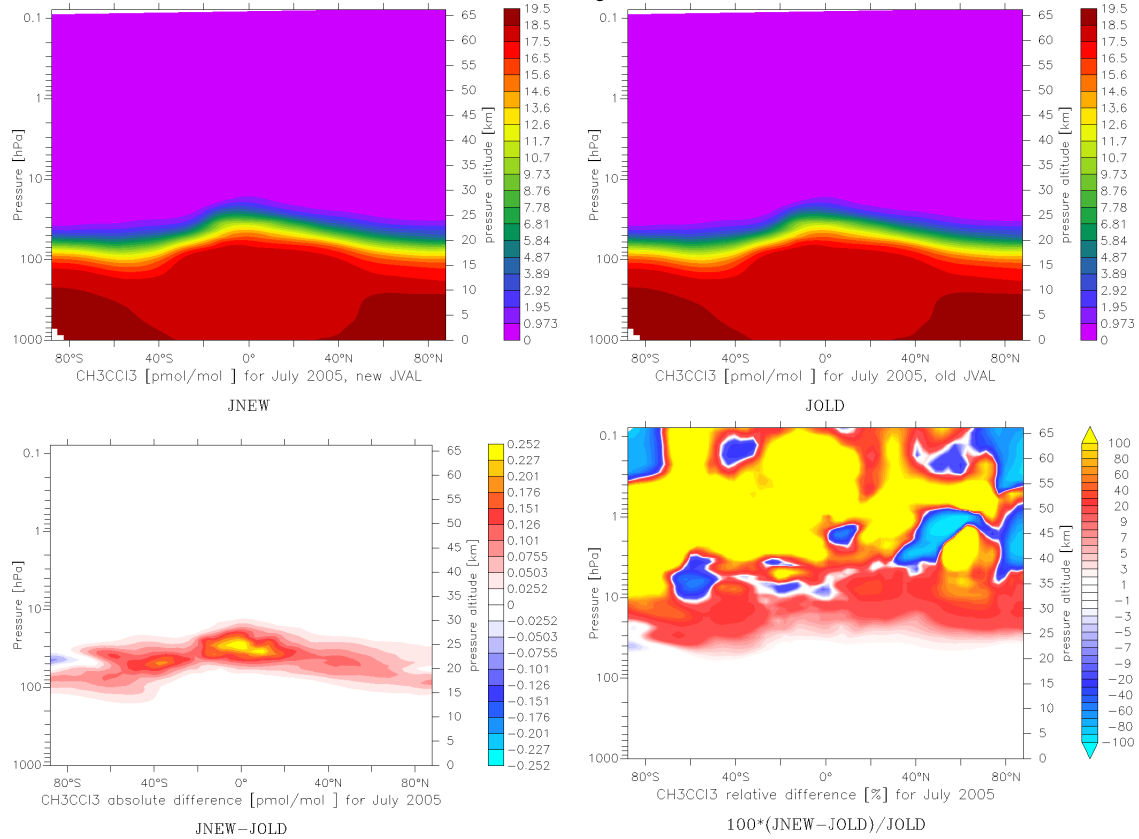

## 5.13 CH<sub>3</sub>Cl

— January —

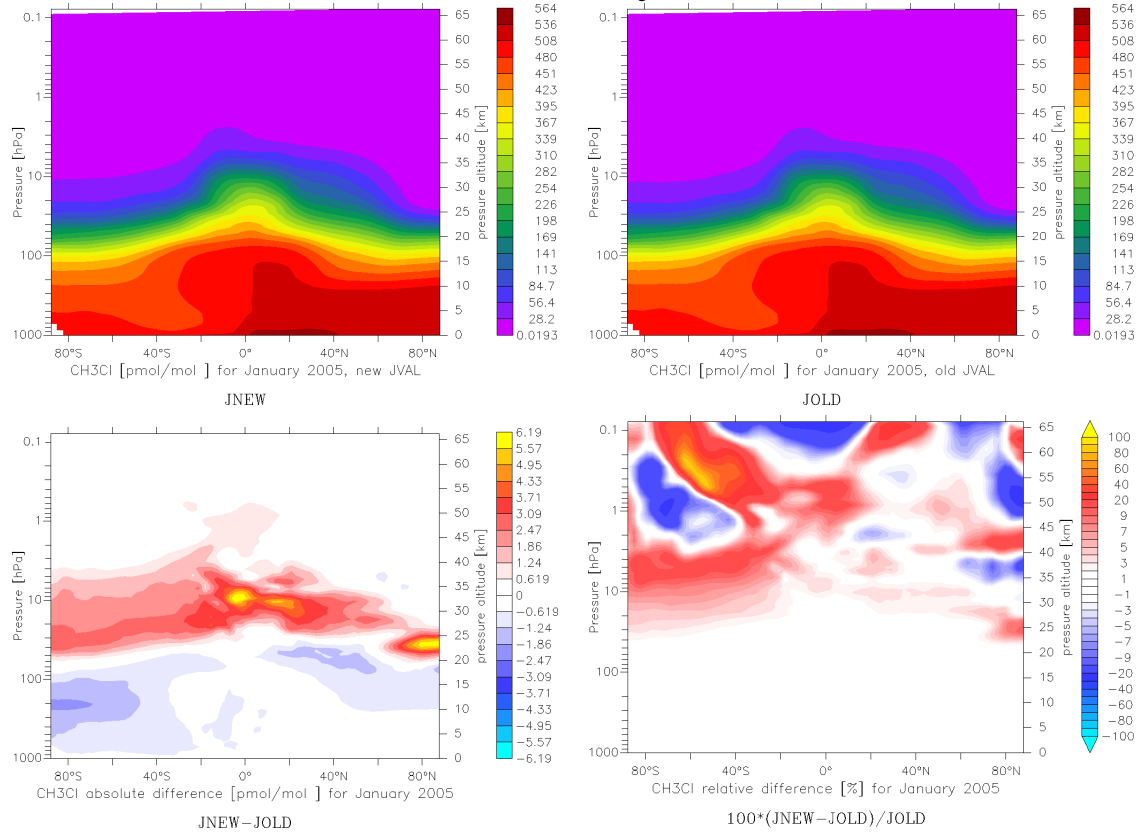

— July —

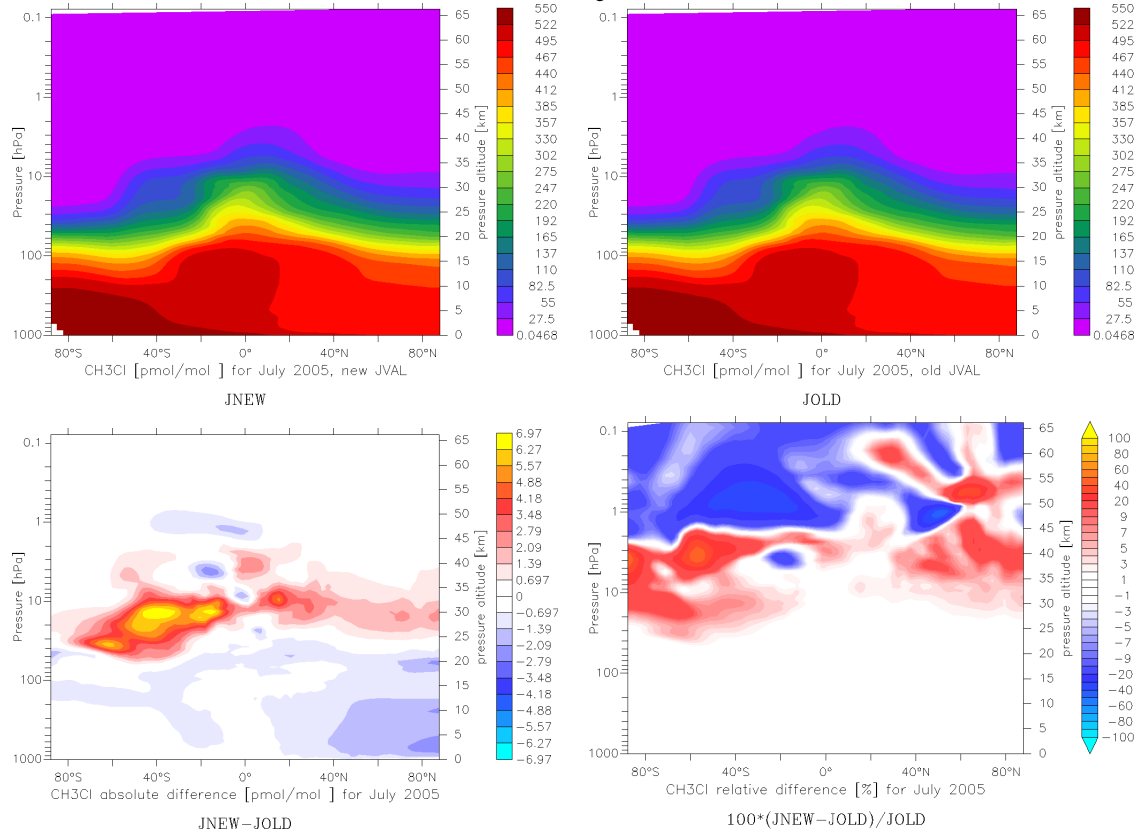

## 6 Bromine compounds

### 6.1 Br<sub>2</sub>

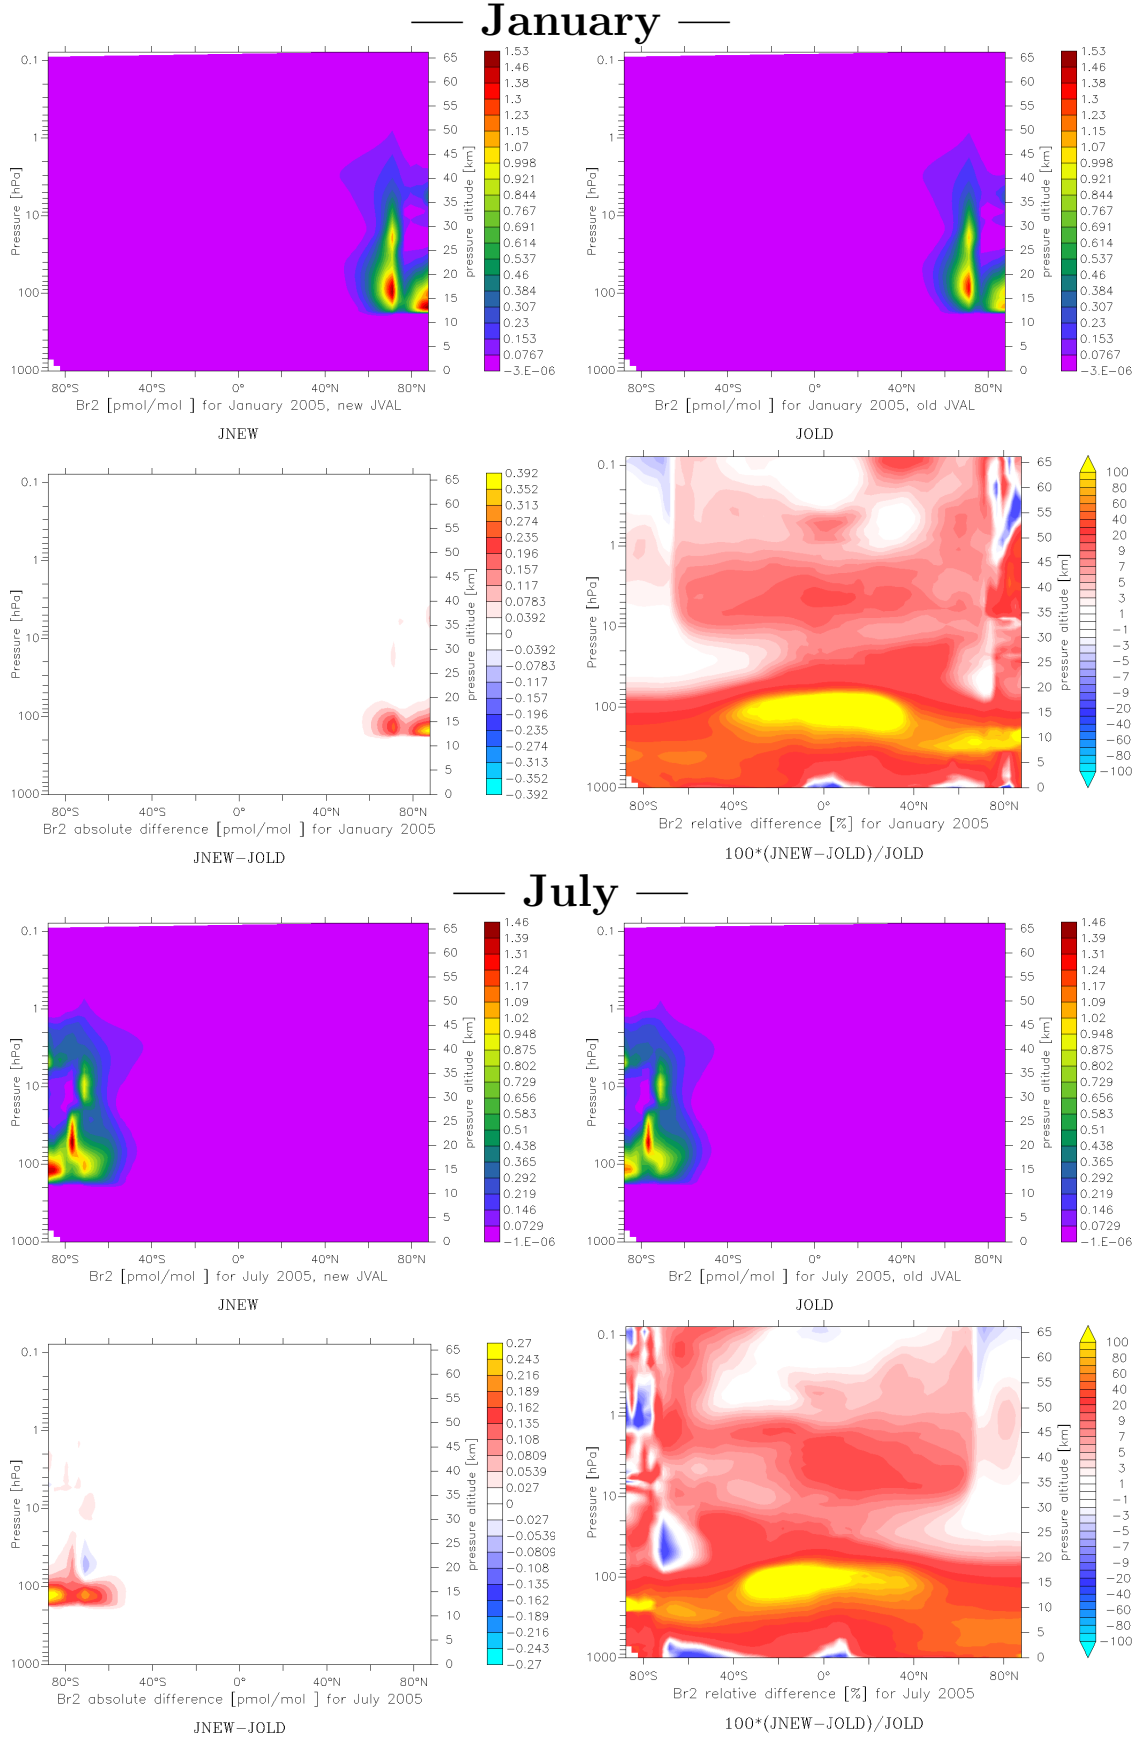

## 6.2 BrO

— January —

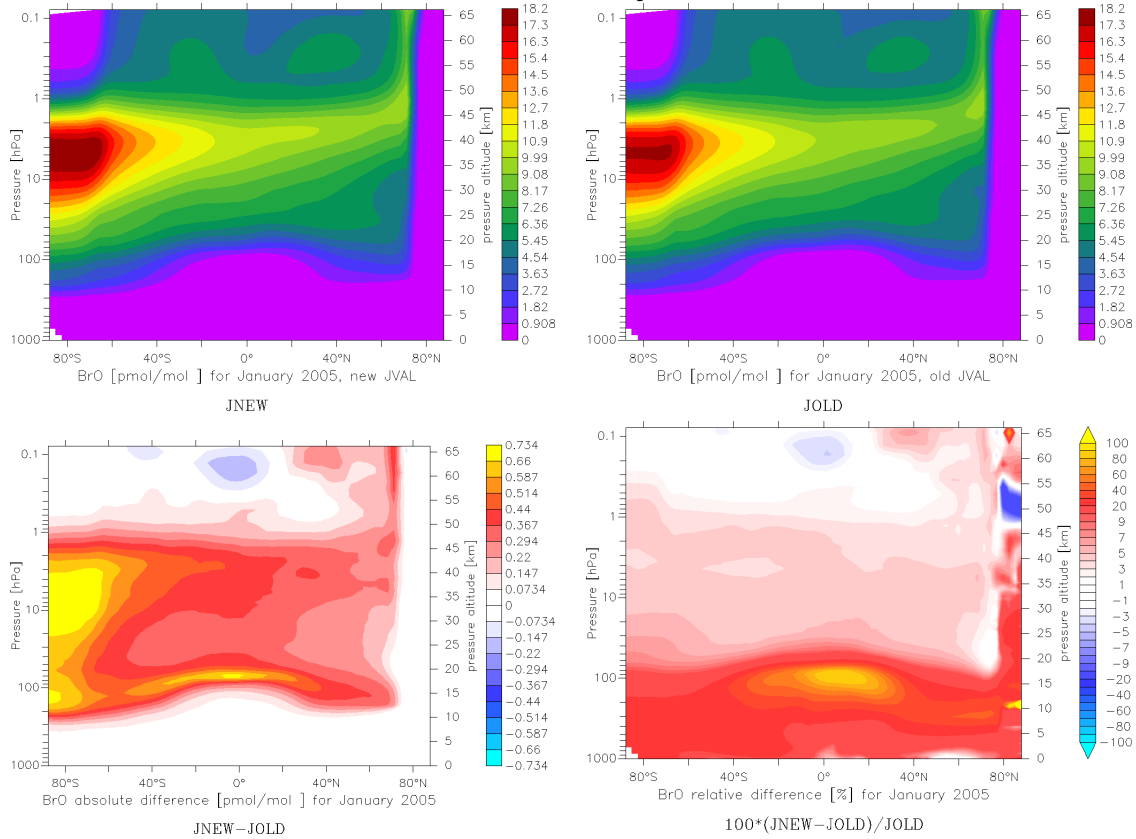

— July —

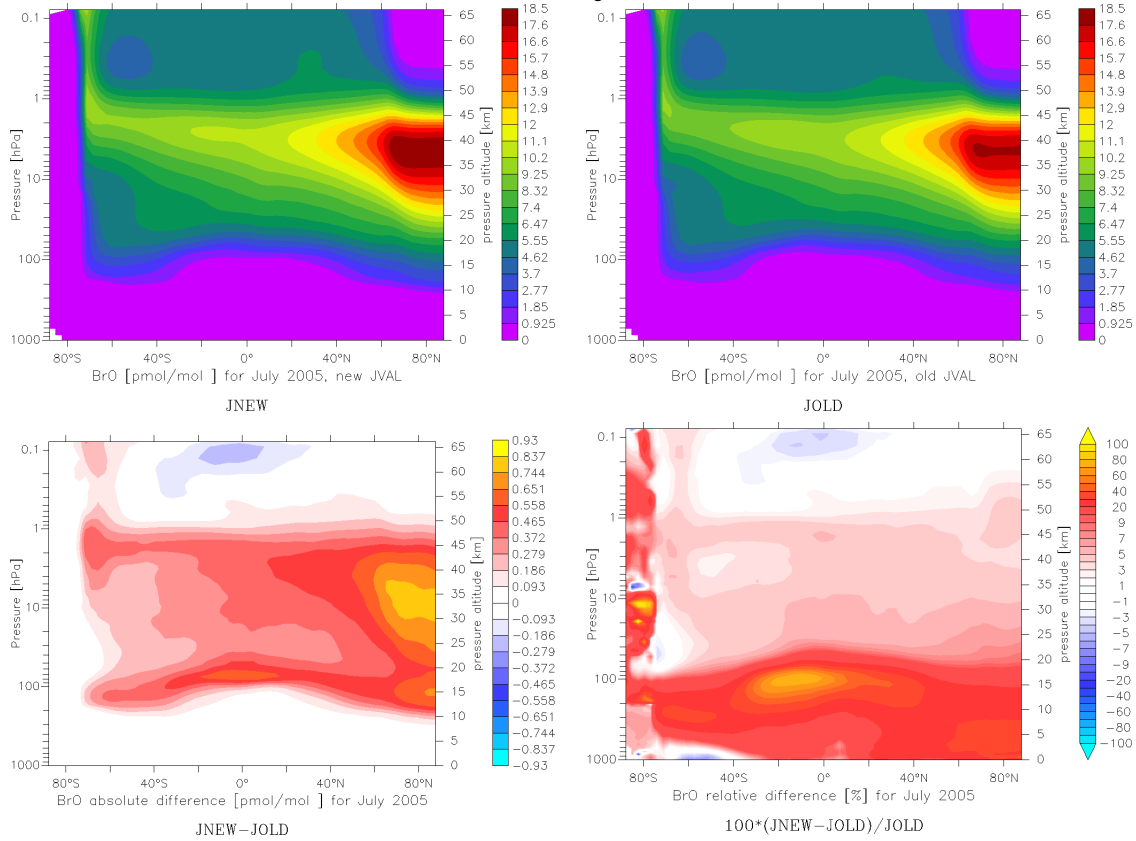

## 6.3 HOBr

— January —

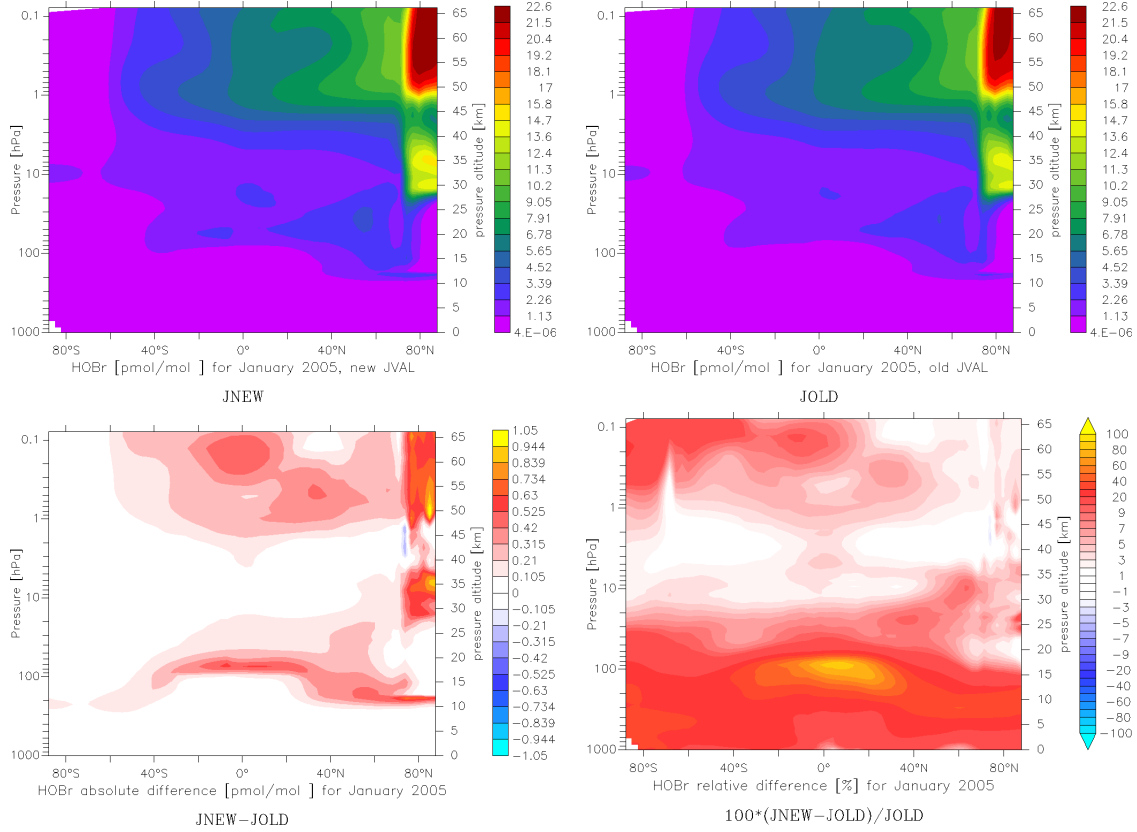

— July —

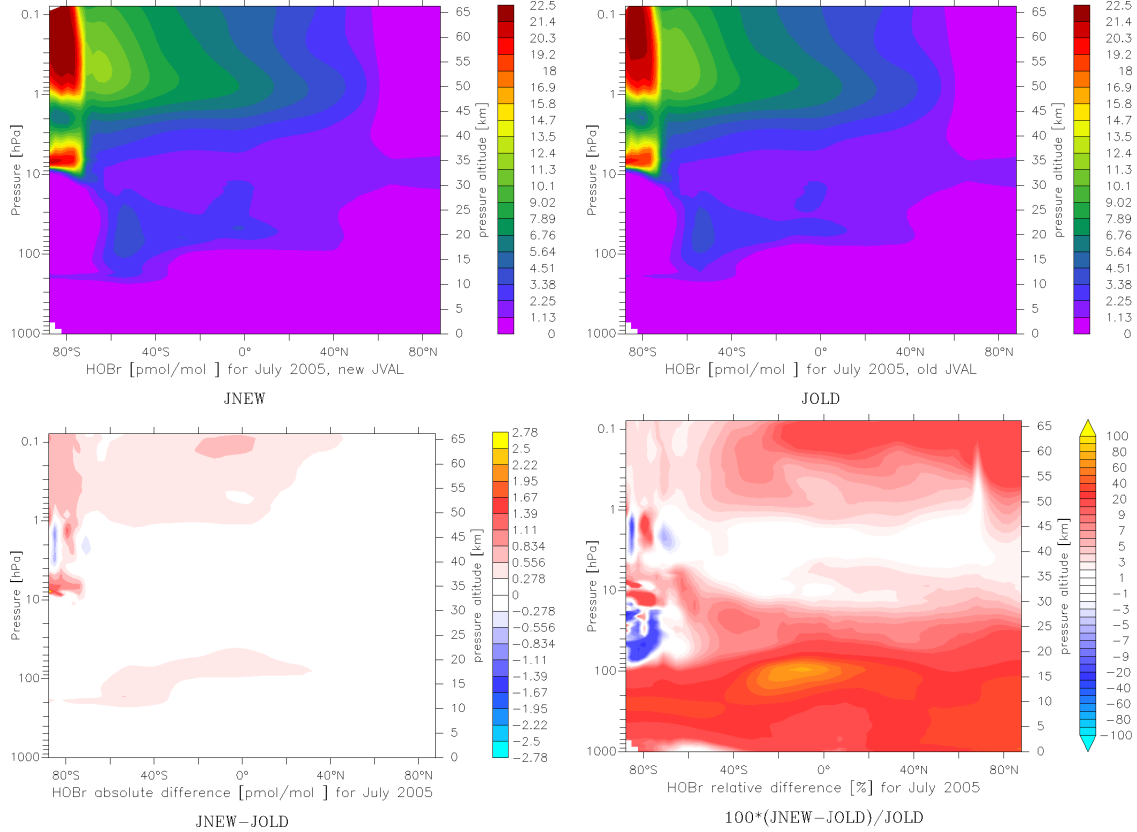

## 6.4 HBr

— January —

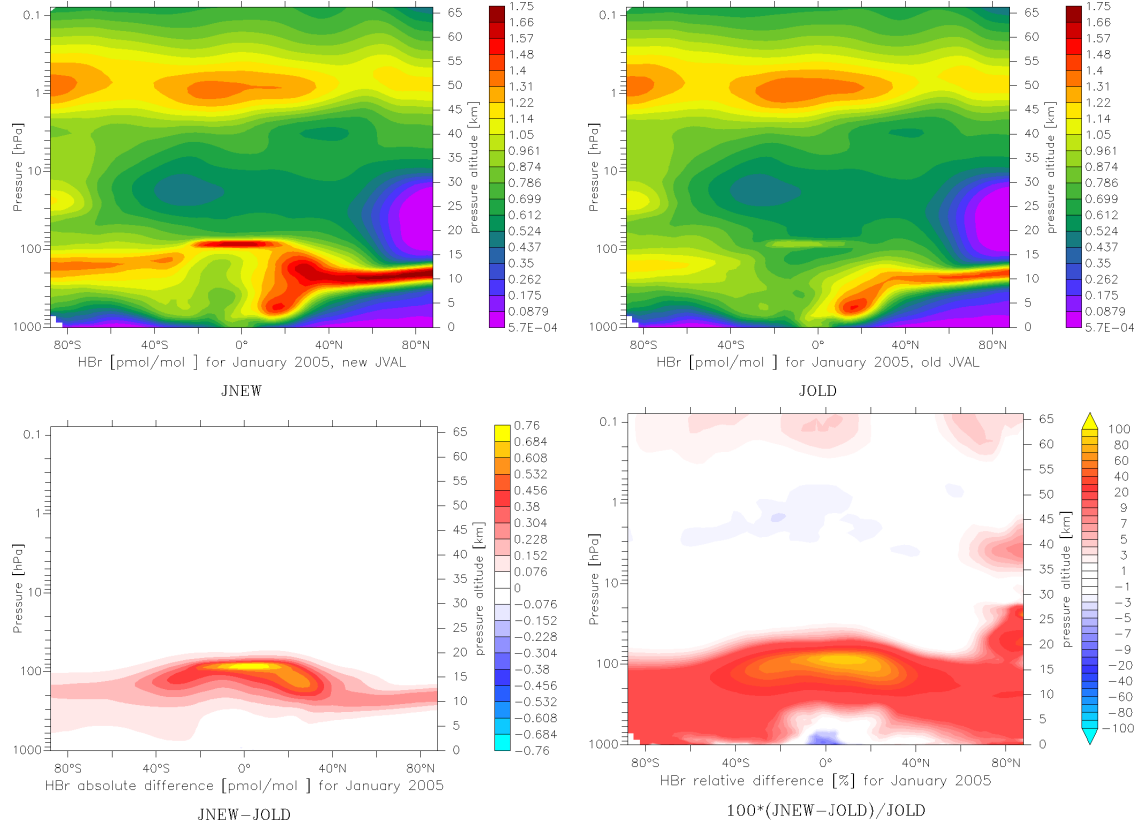

— July —

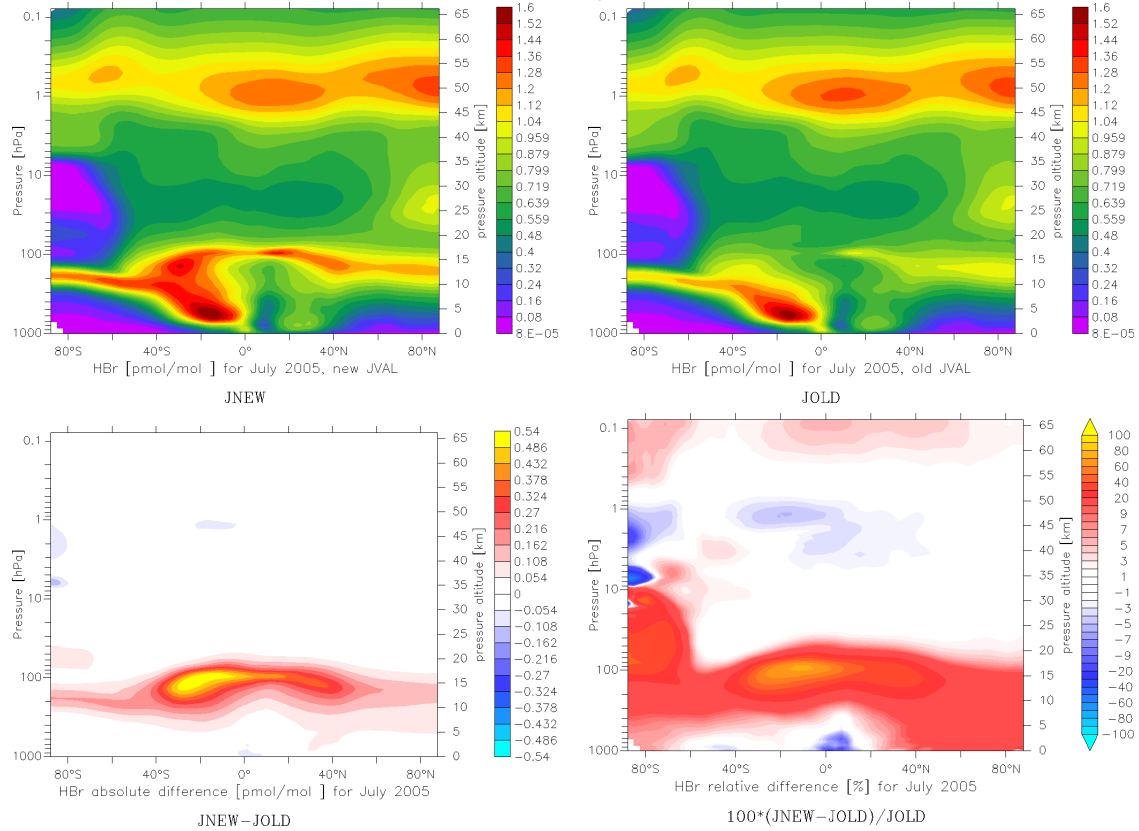

## 6.5 BrNO<sub>3</sub>

— January —

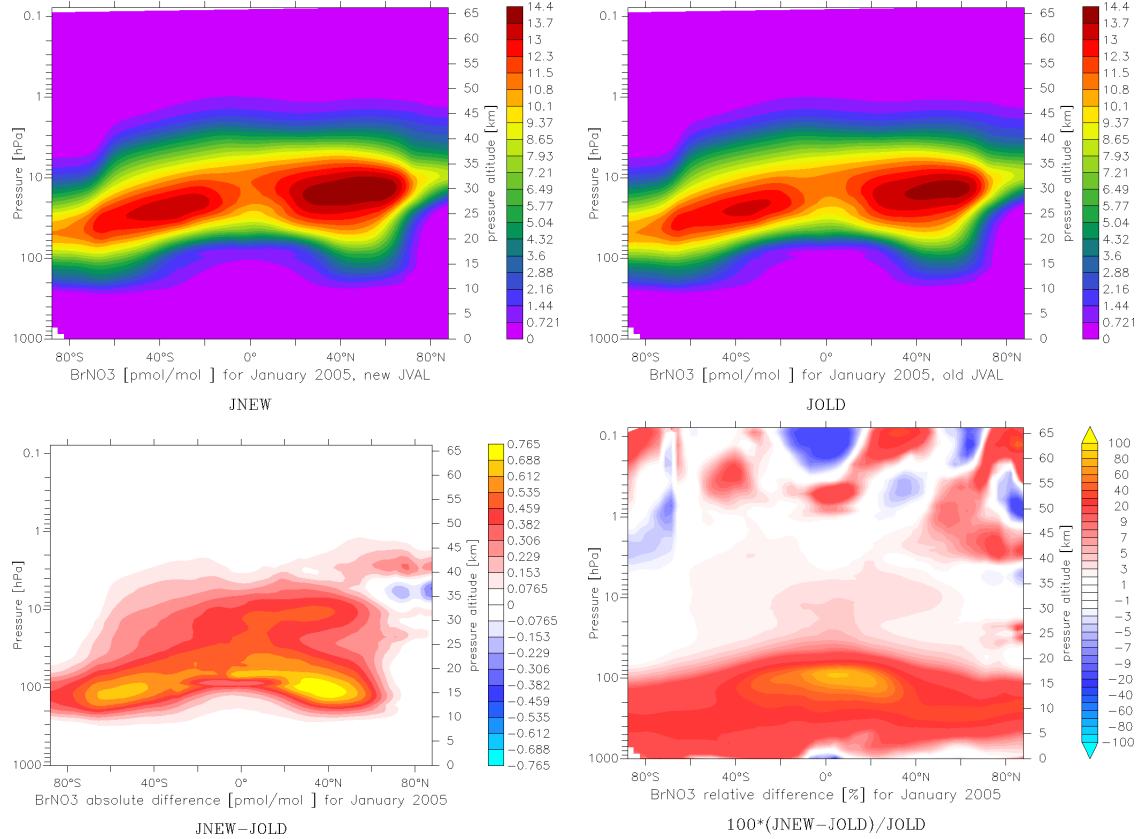

— July —

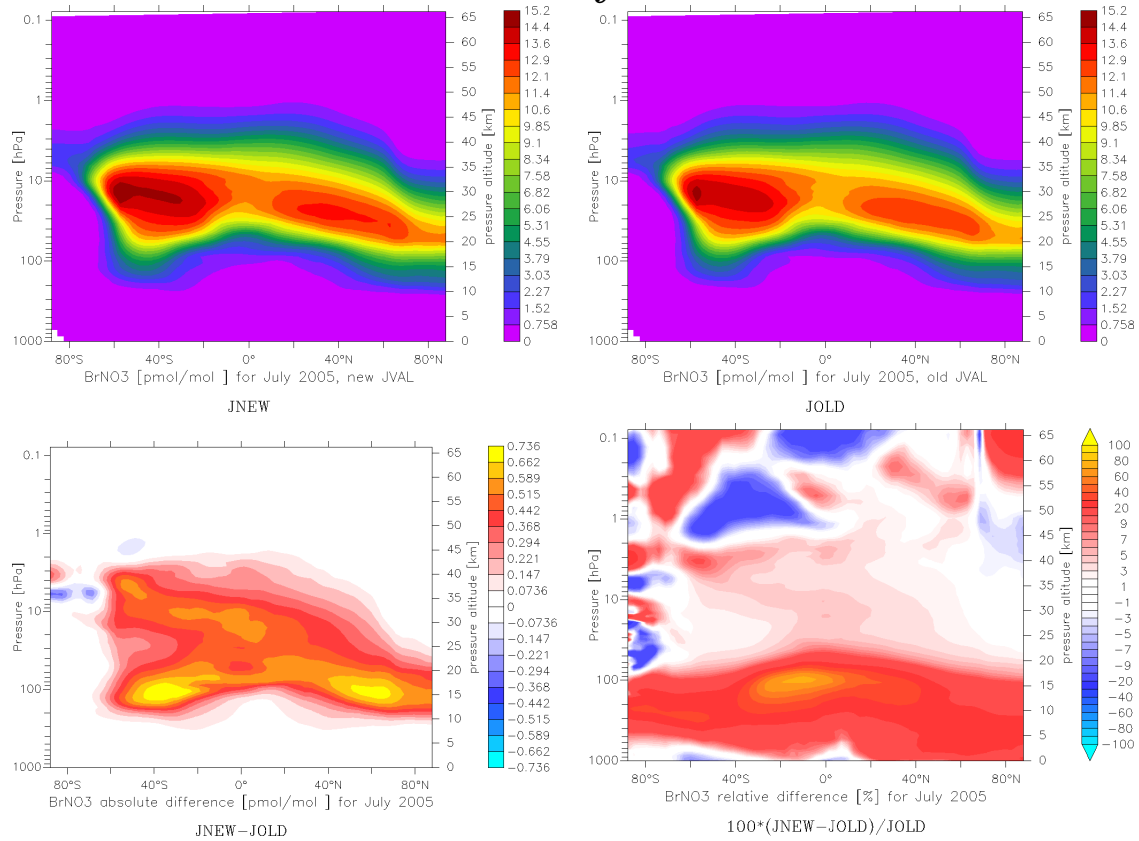



## 6.6 BrCl

— January —

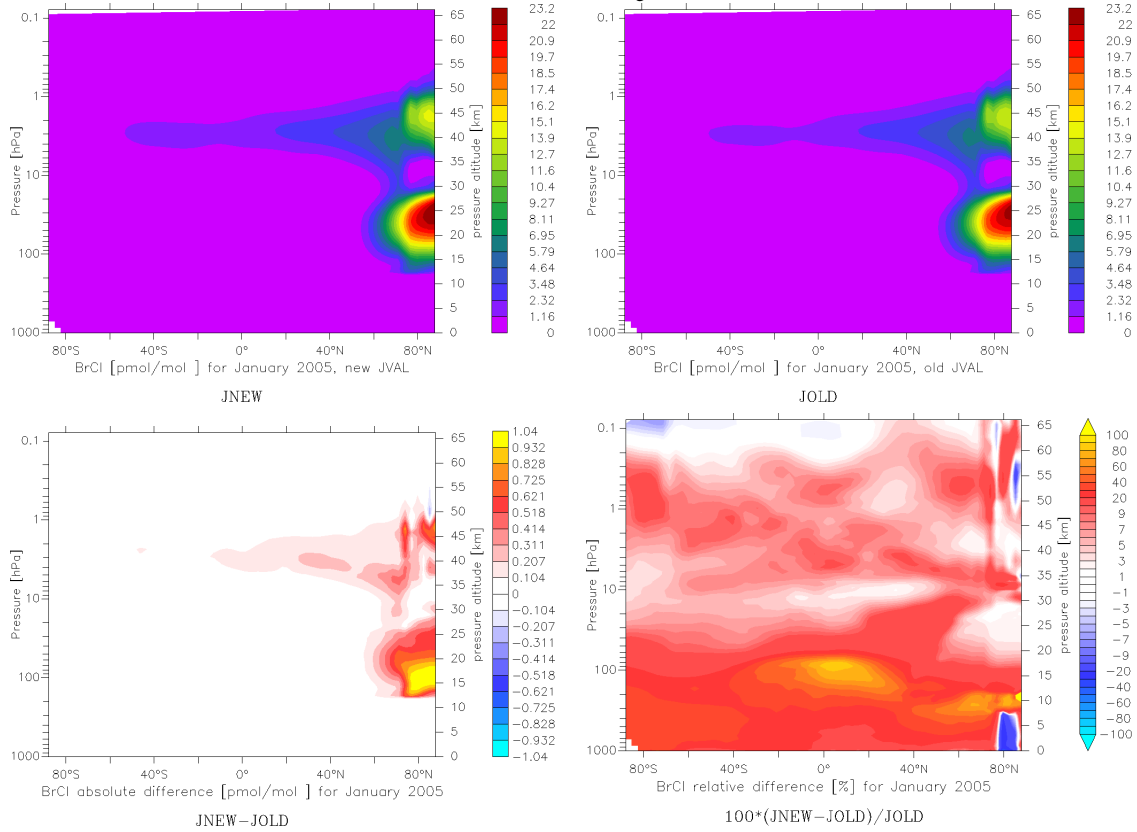

— July —

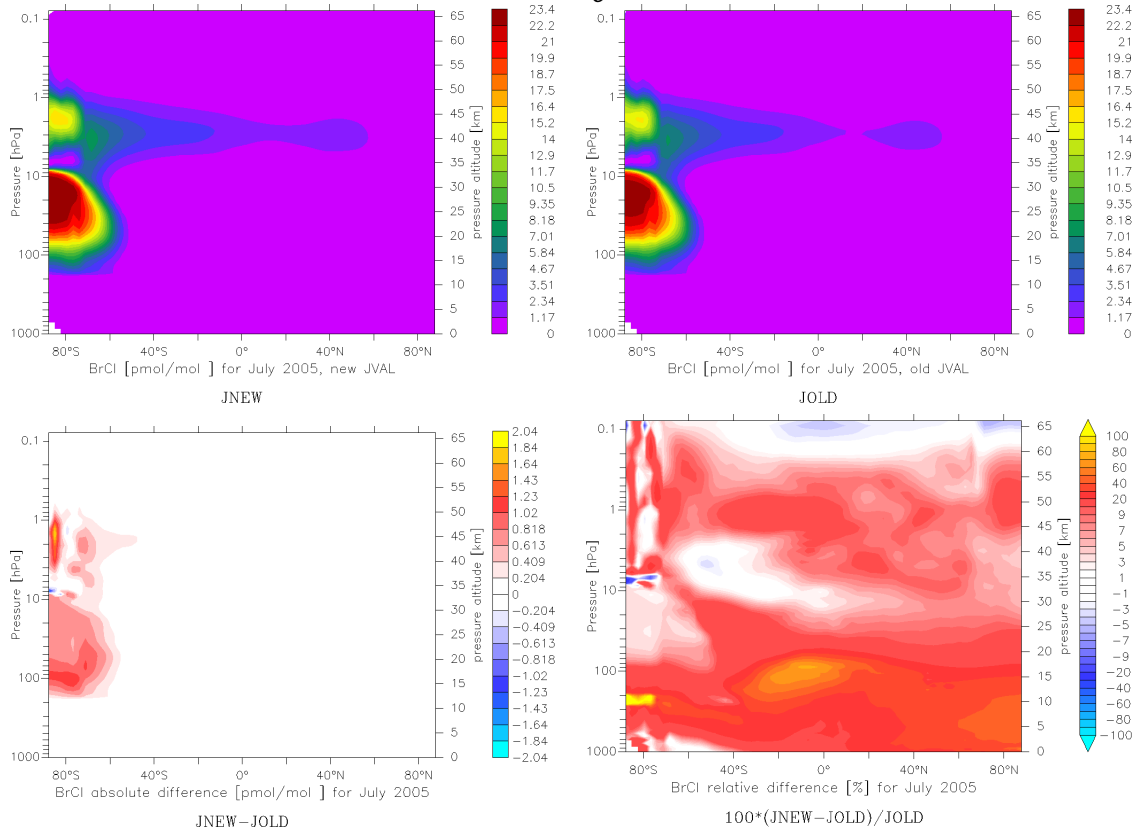

## 6.7 BrO<sub>x</sub>

— January —

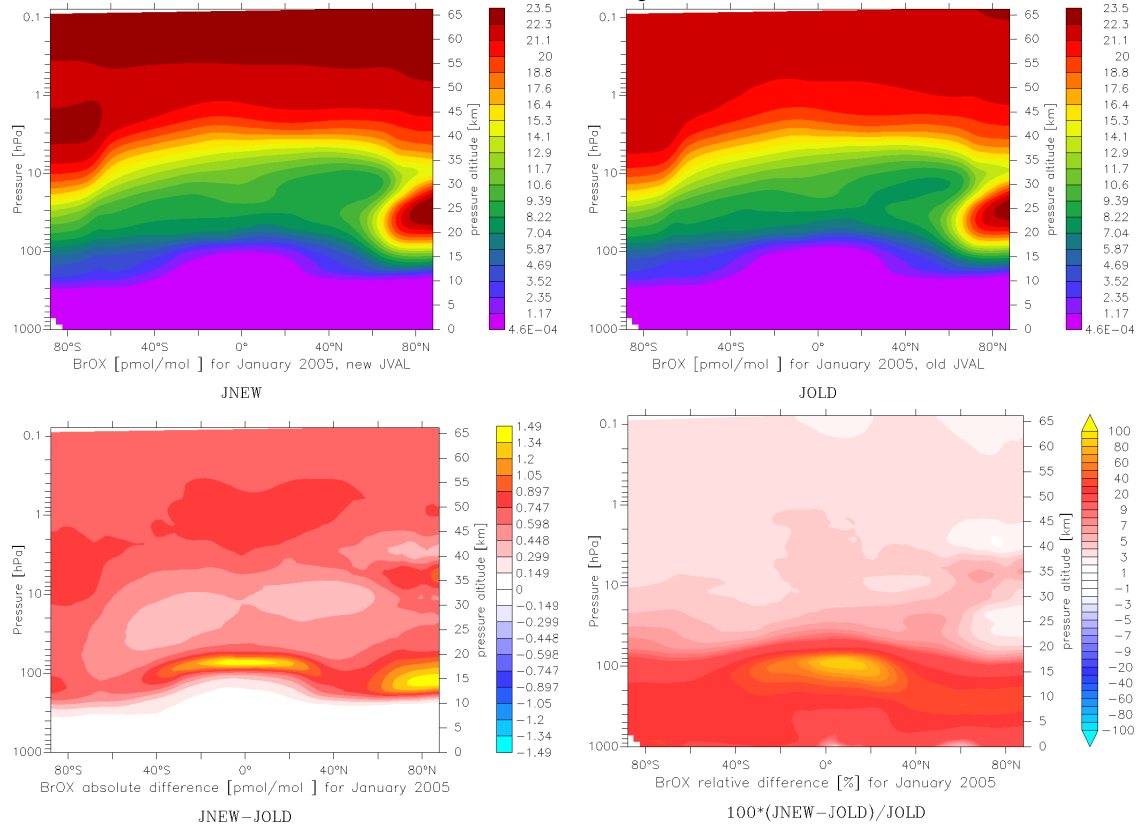

— July —

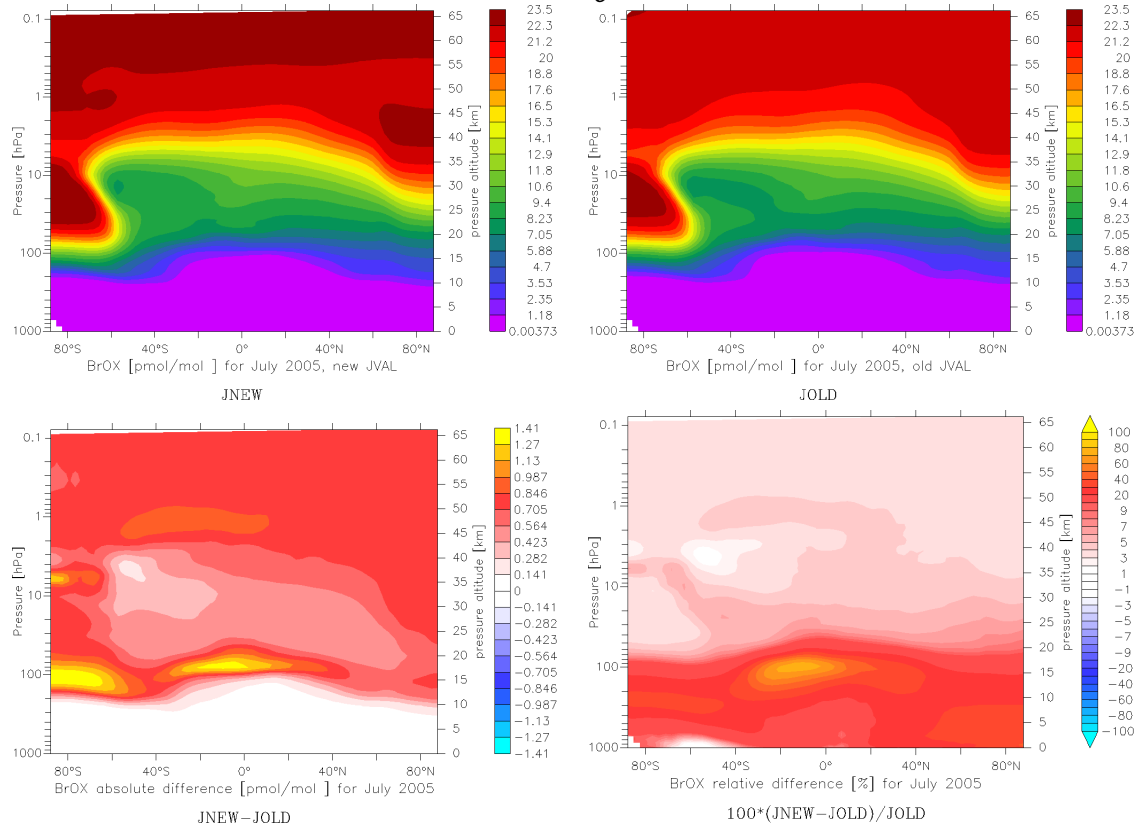

## 6.8 CF<sub>2</sub>ClBr

— January —

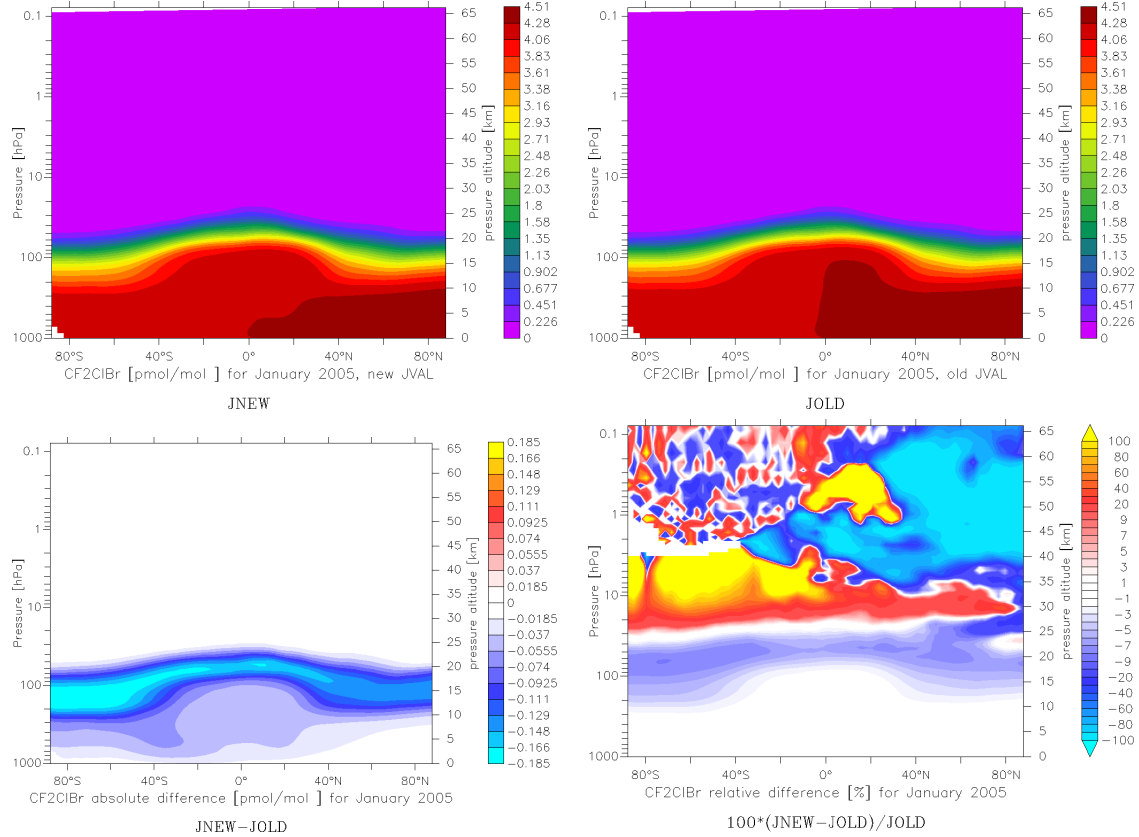

— July —

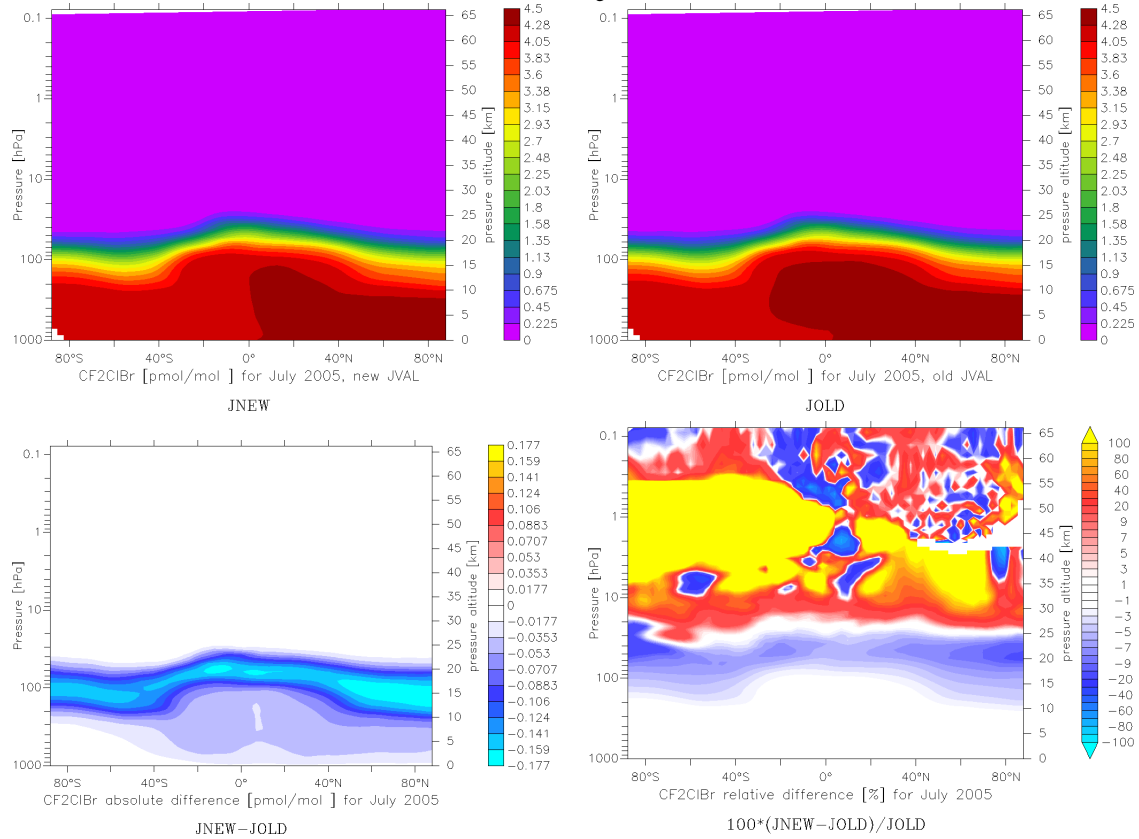

## 6.9 CF<sub>3</sub>Br

— January —

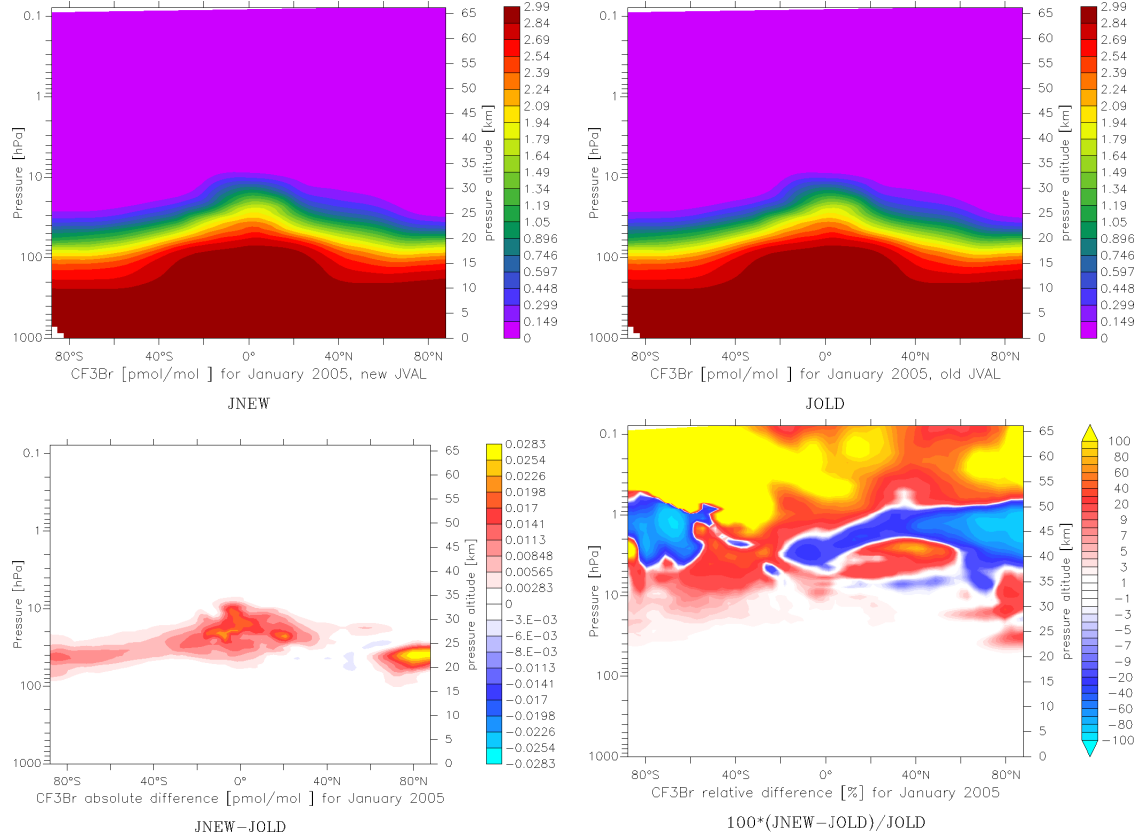

— July —

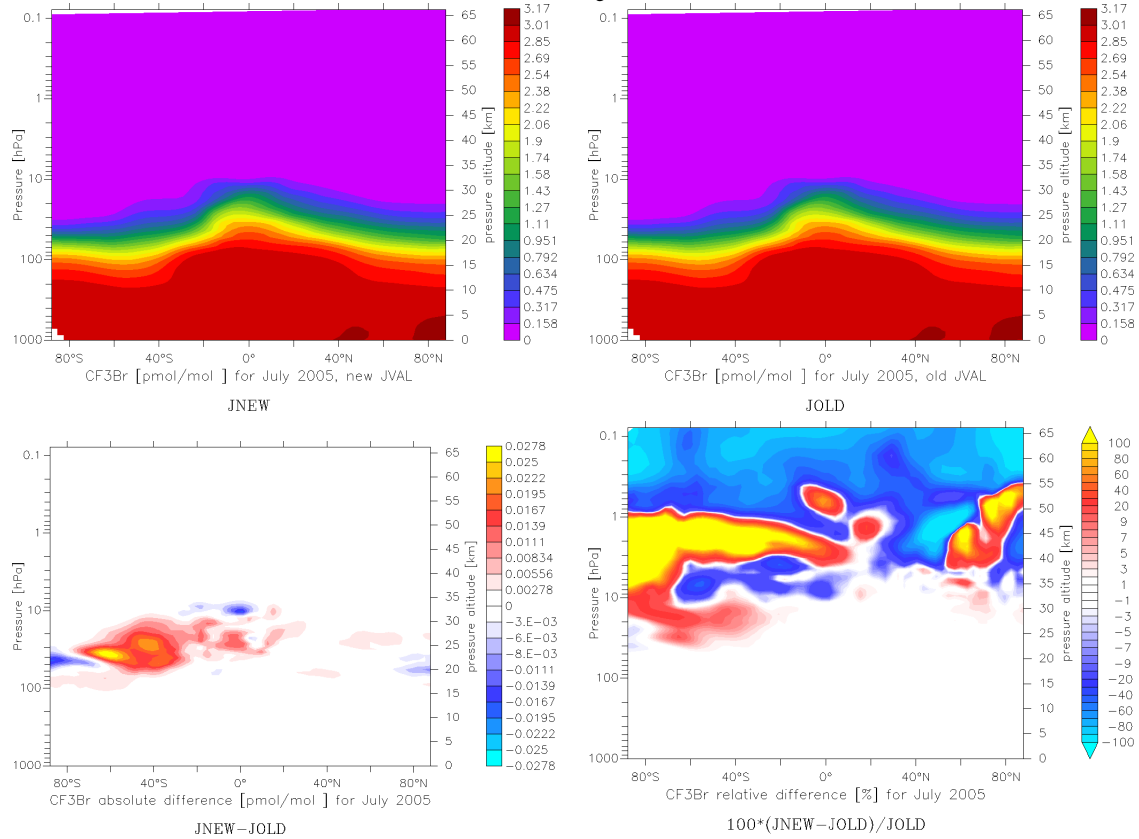

## 6.10 CH<sub>3</sub>Br

— January —

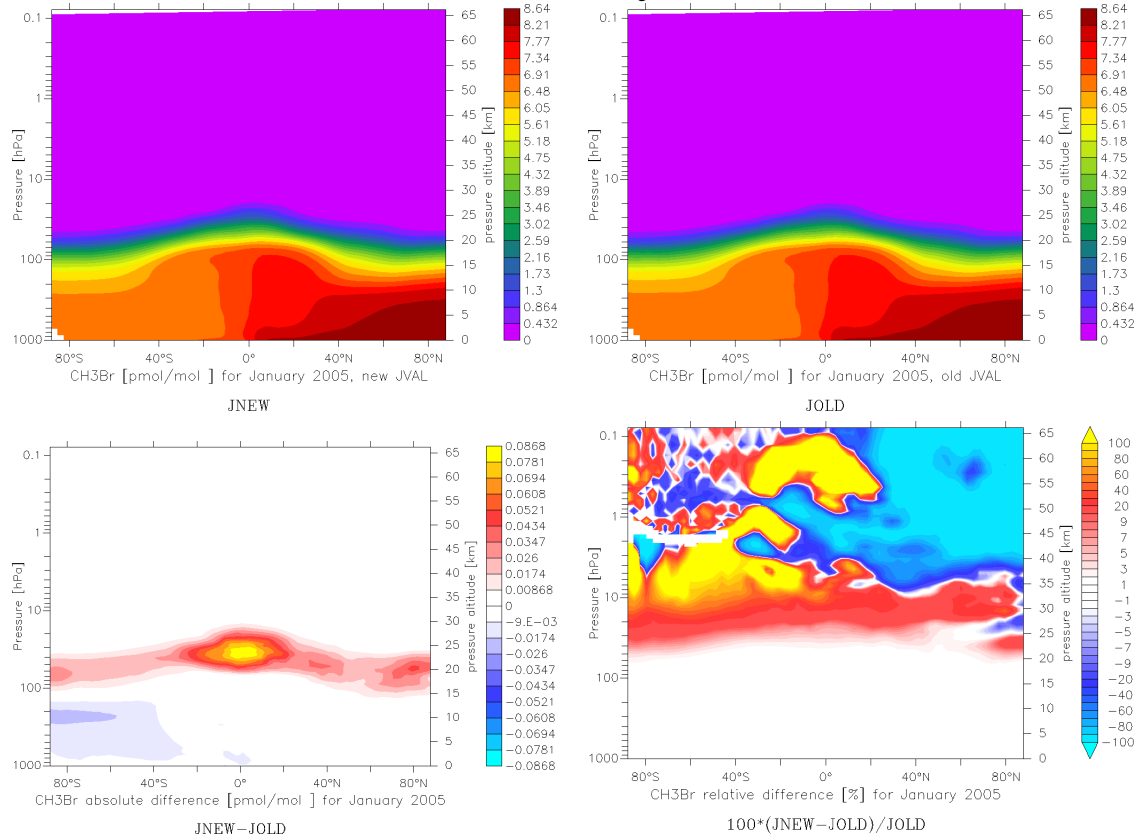

— July —

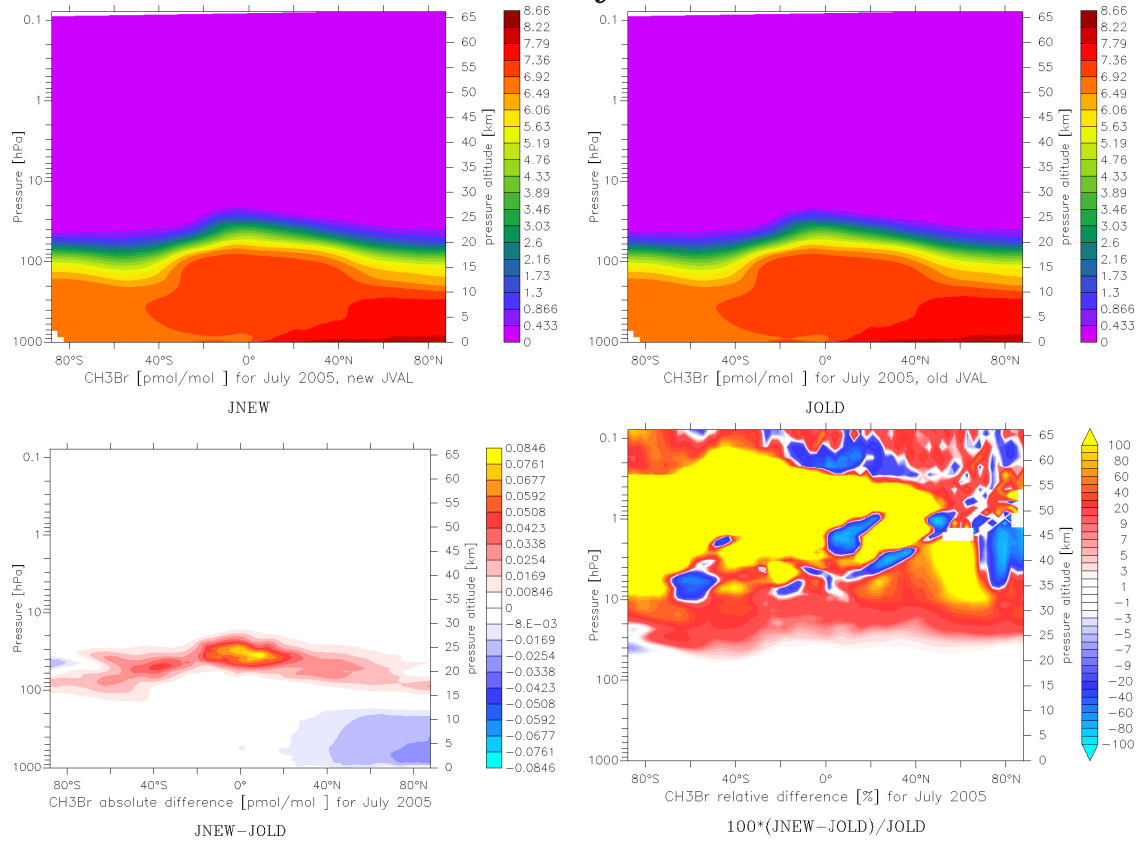

Supplement: Supplementary file 7 [file gmd-7-2653-2014-supplement.zip]
