# Supplementary material for: The photolysis module JVAL-14, compatible with the MESSy standard, and the JVal PreProcessor (JVPP)
Source: Copernicus journal article supplement (doi:10.5194/gmd-7-2653-2014), 2014-11-13
Supplement: Supplementary file 1 [file gmd-7-2653-2014-supplement.zip]

Table 1: JVAL Photolysis reactions (version from September 24, 2014)

| #      | reaction                                                            | reference for spectrum                                                                                                                                                       |
|--------|---------------------------------------------------------------------|------------------------------------------------------------------------------------------------------------------------------------------------------------------------------|
| J1000  | $\text{O}_2 \xrightarrow{h\nu} \text{O} + \text{O}$                 | Sander et al. (2011), Lyman-alpha from Chabrilat and Kockarts (1997) and Chabrilat and Kockarts (1998), Schumann-Runge band parameterization from Koppers and Murtagh (1996) |
| J1001b | $\text{O}_3 \xrightarrow{h\nu} \text{O}(^3\text{P}) + \text{O}_2$   | Sander et al. (2011)                                                                                                                                                         |
| J1001a | $\text{O}_3 \xrightarrow{h\nu} \text{O}(^1\text{D}) + \text{O}_2$   | Sander et al. (2011)                                                                                                                                                         |
| J2101  | $\text{H}_2\text{O}_2 \xrightarrow{h\nu} \text{OH} + \text{OH}$     | Sander et al. (2011)                                                                                                                                                         |
| J3101  | $\text{NO}_2 \xrightarrow{h\nu} \text{NO} + \text{O}$               | Sander et al. (2011)                                                                                                                                                         |
| J3103a | $\text{NO}_3 \xrightarrow{h\nu} \text{NO}_2 + \text{O}$             | Sander et al. (2011)                                                                                                                                                         |
| J3103b | $\text{NO}_3 \xrightarrow{h\nu} \text{NO} + \text{O}_2$             | Sander et al. (2011)                                                                                                                                                         |
| J3104  | $\text{N}_2\text{O}_5 \xrightarrow{h\nu} \text{NO}_2 + \text{NO}_3$ | Sander et al. (2011)                                                                                                                                                         |
| J3201  | $\text{HNO}_3 \xrightarrow{h\nu} \text{products}$                   | Sander et al. (2011)                                                                                                                                                         |
| J3202  | $\text{HNO}_4 \xrightarrow{h\nu} \text{products}$                   | Sander et al. (2011), IR overtones from Roehl et al. (2002)                                                                                                                  |
| J4204  | $\text{PAN} \xrightarrow{h\nu} \text{products}$                     | Sander et al. (2011)                                                                                                                                                         |
| J3200  | $\text{HONO} \xrightarrow{h\nu} \text{products}$                    | Sander et al. (2011)                                                                                                                                                         |
| J4100  | $\text{CH}_3\text{OOH} \xrightarrow{h\nu} \text{products}$          | Sander et al. (2011)                                                                                                                                                         |
| J4101a | $\text{HCHO} \xrightarrow{h\nu} \text{CO} + \text{H}_2$             | Sander et al. (2011), quantum yields at 300 K and 1 atm                                                                                                                      |
| J4101b | $\text{HCHO} \xrightarrow{h\nu} \text{CHO} + \text{H}$              | Sander et al. (2011), quantum yields at 300 K and 1 atm                                                                                                                      |
| J4202  | $\text{CH}_3\text{CO}_3\text{H} \xrightarrow{h\nu} \text{products}$ | Sander et al. (2011)                                                                                                                                                         |
| J4201  | $\text{CH}_3\text{CHO} \xrightarrow{h\nu} \text{CH}_3 + \text{CHO}$ | Sander et al. (2011)                                                                                                                                                         |
| J4301  | $\text{CH}_3\text{COCH}_3 \xrightarrow{h\nu} \text{products}$       | Hardcoded from old JVAL code. Pressure dependent.                                                                                                                            |
| J4303  | $\text{MGlyOX} \xrightarrow{h\nu} \text{products}$                  | Hardcoded from old JVAL code. Pressure dependent.                                                                                                                            |
| J6201  | $\text{HOCl} \xrightarrow{h\nu} \text{OH} + \text{Cl}$              | Sander et al. (2011)                                                                                                                                                         |
| J6101  | $\text{OCIO} \xrightarrow{h\nu} \text{products}$                    | Sander et al. (2011), value at 204 K                                                                                                                                         |
| J6100  | $\text{Cl}_2\text{O}_2 \xrightarrow{h\nu} \text{Cl} + \text{ClO}_2$ | Sander et al. (2011)                                                                                                                                                         |
| J6301a | $\text{ClNO}_3 \xrightarrow{h\nu} \text{Cl} + \text{NO}_3$          | Sander et al. (2011)                                                                                                                                                         |
| J6300  | $\text{ClNO}_2 \xrightarrow{h\nu} \text{products}$                  | Ghosh et al. (2012)                                                                                                                                                          |
| J6000  | $\text{Cl}_2 \xrightarrow{h\nu} 2\text{Cl}$                         | Sander et al. (2011)                                                                                                                                                         |
| J7100  | $\text{BrO} \xrightarrow{h\nu} \text{Br} + \text{O}$                | Sander et al. (2011)                                                                                                                                                         |
| J7200  | $\text{HOBr} \xrightarrow{h\nu} \text{OH} + \text{Br}$              | Sander et al. (2011)                                                                                                                                                         |
| J7600  | $\text{BrCl} \xrightarrow{h\nu} \text{Br} + \text{Cl}$              | Sander et al. (2011), based on formula by Maric et al. (1994)                                                                                                                |
| J7301  | $\text{BrNO}_3 \xrightarrow{h\nu} \text{products}$                  | Sander et al. (2011)                                                                                                                                                         |
| J7300  | $\text{BrNO}_2 \xrightarrow{h\nu} \text{products}$                  | Sander et al. (2011)                                                                                                                                                         |
| J7000  | $\text{Br}_2 \xrightarrow{h\nu} \text{products}$                    | Sander et al. (2011)                                                                                                                                                         |
| J6401  | $\text{CCl}_4 \xrightarrow{h\nu} \text{products}$                   | Sander et al. (2011)                                                                                                                                                         |
| J6400  | $\text{CH}_3\text{Cl} \xrightarrow{h\nu} \text{products}$           | Sander et al. (2011)                                                                                                                                                         |
| J6402  | $\text{CH}_3\text{CCl}_3 \xrightarrow{h\nu} \text{products}$        | Sander et al. (2011)                                                                                                                                                         |
| J6500  | $\text{CFCl}_3 \xrightarrow{h\nu} \text{products}$                  | Sander et al. (2011), formula for temperature-dependence from DeMore et al. (1997)                                                                                           |
| J6501  | $\text{CF}_2\text{Cl}_2 \xrightarrow{h\nu} \text{products}$         | Sander et al. (2011), formula for temperature-dependence from DeMore et al. (1997)                                                                                           |
| J7400  | $\text{CH}_3\text{Br} \xrightarrow{h\nu} \text{products}$           | Sander et al. (2011)                                                                                                                                                         |

Table 1: Photolysis reactions (... continued)

| #      | reaction                                                                    | reference for spectrum                                                                                       |
|--------|-----------------------------------------------------------------------------|--------------------------------------------------------------------------------------------------------------|
| J7601  | $\text{CF}_2\text{ClBr} \xrightarrow{h\nu} \text{products}$                 | Sander et al. (2011)                                                                                         |
| J7500  | $\text{CF}_3\text{Br} \xrightarrow{h\nu} \text{products}$                   | Sander et al. (2011)                                                                                         |
| J8401  | $\text{CH}_3\text{I} \xrightarrow{h\nu} \text{products}$                    | Sander et al. (2011), using data at 298 K, temperature dependence not considered                             |
| J8402  | $\text{C}_3\text{H}_7\text{I} \xrightarrow{h\nu} \text{products}$           | Sander et al. (2011)                                                                                         |
| J8403  | $\text{CH}_2\text{ClI} \xrightarrow{h\nu} \text{products}$                  | Sander et al. (2011), using data for 298 K, temperature dependence not considered                            |
| J8400  | $\text{CH}_2\text{I}_2 \xrightarrow{h\nu} \text{products}$                  | Sander et al. (2011), using data for 298 K, temperature dependence not considered                            |
| J8100  | $\text{IO} \xrightarrow{h\nu} \text{I} + \text{O}$                          | Sander et al. (2011)                                                                                         |
| J8200  | $\text{HOI} \xrightarrow{h\nu} \text{products}$                             | Sander et al. (2011)                                                                                         |
| J8000  | $\text{I}_2 \xrightarrow{h\nu} 2\text{I}$                                   | Keller-Rudek et al. (2013), based on Sander et al. (2006)                                                    |
| J8600  | $\text{ICl} \xrightarrow{h\nu} \text{products}$                             | Sander et al. (2011), values shown as “< 1” in their Table 4H-10 were set to 0                               |
| J8700  | $\text{IBr} \xrightarrow{h\nu} \text{products}$                             | Sander et al. (2011)                                                                                         |
| J8300  | $\text{INO}_2 \xrightarrow{h\nu} \text{products}$                           | Sander et al. (2011)                                                                                         |
| J8301  | $\text{INO}_3 \xrightarrow{h\nu} \text{products}$                           | Sander et al. (2011)                                                                                         |
|        | $\text{SO}_2 \xrightarrow{h\nu} \text{SO}_2^*$                              | Danielache et al. (2008), quantum yield for dissociation is unknown.                                         |
|        | $\text{SO}_3 \xrightarrow{h\nu} \text{products}$                            | Sander et al. (2011)                                                                                         |
| J9000  | $\text{OCS} \xrightarrow{h\nu} \text{products}$                             | Sander et al. (2011)                                                                                         |
| J2100  | $\text{H}_2\text{O} \xrightarrow{h\nu} \text{H} + \text{OH}$                | Sander et al. (2011)                                                                                         |
| J3100  | $\text{N}_2\text{O} \xrightarrow{h\nu} \text{N}_2 + \text{O}(^1\text{D})$   | Sander et al. (2011)                                                                                         |
| J3102  | $\text{NO} \xrightarrow{h\nu} \text{N} + \text{O}$                          | Hardcoded from old JVAL code.                                                                                |
| J4102  | $\text{CO}_2 \xrightarrow{h\nu} \text{CO} + \text{O}$                       | Shemansky (1972), Lyman-alpha from Inn et al. (1953)                                                         |
| J6200  | $\text{HCl} \xrightarrow{h\nu} \text{H} + \text{Cl}$                        | Sander et al. (2011)                                                                                         |
| J7603  | $\text{CHCl}_2\text{Br} \xrightarrow{h\nu} \text{products}$                 | Sander et al. (2011)                                                                                         |
| J7604  | $\text{CHClBr}_2 \xrightarrow{h\nu} \text{products}$                        | Sander et al. (2011)                                                                                         |
| J7602  | $\text{CH}_2\text{ClBr} \xrightarrow{h\nu} \text{products}$                 | Sander et al. (2011)                                                                                         |
| J7401  | $\text{CH}_2\text{Br}_2 \xrightarrow{h\nu} \text{products}$                 | Sander et al. (2011)                                                                                         |
| J7402  | $\text{CHBr}_3 \xrightarrow{h\nu} \text{products}$                          | Sander et al. (2011), formula for temperature-dependence not only used for 290-340 nm but also for > 340 nm. |
| J9002  | $\text{SF}_6 \xrightarrow{h\nu} \text{products}$                            | Lyman-alpha from Ravishankara et al. (1993)                                                                  |
| J6301b | $\text{ClNO}_3 \xrightarrow{h\nu} \text{ClO} + \text{NO}_2$                 | Sander et al. (2011)                                                                                         |
| J4411  | $\text{MACR} \xrightarrow{h\nu} \text{products}$                            | Hardcoded from old JVAL code. Pressure dependent.                                                            |
| J4401  | $\text{MVK} \xrightarrow{h\nu} \text{products}$                             | Hardcoded from old JVAL code. Pressure dependent.                                                            |
| J4208  | $\text{CHOCHO} \xrightarrow{h\nu} 2\text{CHO}$                              | Hardcoded from old JVAL code. Pressure dependent.                                                            |
| J4205  | $\text{HOCH}_2\text{CHO} \xrightarrow{h\nu} \text{products}$                | Sander et al. (2011)                                                                                         |
| J4103  | $\text{CH}_4 \xrightarrow{h\nu} \text{products}$                            | Lyman-alpha from Fig. 1 of Turco (1975)                                                                      |
|        | $\text{H}_2\text{SO}_4 \xrightarrow{h\nu} \text{SO}_3 + \text{H}_2\text{O}$ | Hardcoded from old JVAL code.                                                                                |

## References

- Chabrillat, S. and Kockarts, G.: Simple parameterization of the absorption of the solar Lyman-alpha line, *Geophys. Res. Lett.*, 24, 2659–2662, 1997.
- Chabrillat, S. and Kockarts, G.: Correction to “Simple parameterization of the absorption of the solar Lyman-alpha line”, *Geophys. Res. Lett.*, 25, 79, 1998.
- Danielache, S. O., Eskebjerg, C., Johnson, M. S., Ueno, Y., and Yoshida, N.: High-precision spectroscopy of  $^{32}\text{S}$ ,  $^{33}\text{S}$ , and  $^{34}\text{S}$  sulfur dioxide: Ultraviolet absorption cross sections and isotope effects, *J. Geophys. Res.*, 113D, D17314, doi:10.1029/2007JD009695, 2008.
- DeMore, W. B., Sander, S. P., Golden, D. M., Hampson, R. F., Kurylo, M. J., Howard, C. J., Ravishankara, A. R., Kolb, C. E., and Molina, M. J.: Chemical kinetics and photochemical data for use in stratospheric modeling. Evaluation number 12, JPL Publication 97-4, Jet Propulsion Laboratory, Pasadena, CA, 1997.
- Ghosh, B., Papanastasiou, D. K., Talukdar, R. K., Roberts, J. M., and Burkholder, J. B.: Nitryl chloride ( $\text{ClNO}_2$ ): UV/Vis absorption spectrum between 210 and 296 K and  $\text{O}(^3\text{P})$  quantum yield at 193 and 248 nm, *J. Phys. Chem. A*, 116, 5796–5805, 2012.
- Inn, E. C. Y., Watanabe, K., and Zelikoff, M.: Absorption coefficients of gases in the vacuum ultraviolet. Part III.  $\text{CO}_2$ , *J. Chem. Phys.*, 21, 1648–1650, 1953.
- Keller-Rudek, H., Moortgat, G. K., Sander, R., and Sörensen, R.: The MPI-Mainz UV/VIS spectral atlas of gaseous molecules of atmospheric interest, *Earth Syst. Sci. Data*, 5, 365–373, <http://www.earth-syst-sci-data.net/5/365>, 2013.
- Koppers, G. A. A. and Murtagh, D. P.: Model studies of the influence of  $\text{O}_2$  photodissociation parameterizations in the Schumann-Runge bands on ozone related photolysis in the upper atmosphere, *Ann. Geophys.*, 14, 68–79, 1996.
- Maric, D., Burrows, J. P., and Moortgat, G. K.: A study of the UV-visible absorption spectra of  $\text{Br}_2$  and  $\text{BrCl}$ , *J. Photochem. Photobiol. A: Chem.*, 83, 179–192, 1994.
- Ravishankara, A. R., Solomon, S., Turnipseed, A. A., and Warren, R. F.: Atmospheric lifetimes of long-lived halogenated species, *Science*, 259, 194–199, 1993.
- Roehl, C. M., Nizkorodov, S. A., Zhang, H., Blake, G. A., and Wennberg, P. O.: Photodissociation of peroxyxynitric acid in the near-IR, *J. Phys. Chem. A*, 106, 3766–3772, 2002.
- Sander, S. P., Friedl, R. R., Golden, D. M., Kurylo, M. J., Moortgat, G. K., Keller-Rudek, H., Wine, P. H., Ravishankara, A. R., Kolb, C. E., Molina, M. J., Finlayson-Pitts, B. J., Huie, R. E., and Orkin, V. L.: Chemical Kinetics and Photochemical Data for Use in Atmospheric Studies, Evaluation Number 15, JPL Publication 06-2, Jet Propulsion Laboratory, Pasadena, CA, <http://jpldataeval.jpl.nasa.gov>, 2006.
- Sander, S. P., Abbatt, J., Barker, J. R., Burkholder, J. B., Friedl, R. R., Golden, D. M., Huie, R. E., Kolb, C. E., Kurylo, M. J., Moortgat, G. K., Orkin, V. L., and Wine, P. H.: Chemical Kinetics and Photochemical Data for Use in Atmospheric Studies, Evaluation No. 17, JPL Publication 10-6, Jet Propulsion Laboratory, Pasadena, <http://jpldataeval.jpl.nasa.gov>, 2011.
- Shemansky, D. E.:  $\text{CO}_2$  extinction coefficient 1700–3000 Å, *J. Chem. Phys.*, 56, 1582–1587, 1972.
- Turco, R. P.: Photodissociation rates in the atmosphere below 100 km, *Geophys. Surv.*, 2, 153–192, 1975.
