# Supplementary material for: The photolysis module JVAL-14, compatible with the MESSy standard, and the JVal PreProcessor (JVPP)
Source: Copernicus journal article supplement (doi:10.5194/gmd-7-2653-2014), 2014-11-13
Supplement: Supplementary file 2 [file gmd-7-2653-2014-supplement.zip]

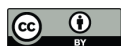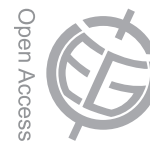

## *Supplement of*

# **The photolysis module JVAL-14, compatible with the MESSy standard, and the JVal PreProcessor (JVPP)**

**R. Sander et al.**

*Correspondence to:* R. Sander (rolf.sander@mpic.de)

- Supplement-Cover-Letter.pdf
- README
- atmos\_impl.pdf
- jval\_14.zip
- jval\_jvnew\_surface.pdf
- jval\_jvnew\_vertical.pdf
- jvpp\_step1.pdf
