# Supplementary material for: The photolysis module JVAL-14, compatible with the MESSy standard, and the JVal PreProcessor (JVPP)
Source: Copernicus journal article supplement (doi:10.5194/gmd-7-2653-2014), 2014-11-13
Supplement: Supplementary file 5 [file gmd-7-2653-2014-supplement.zip]

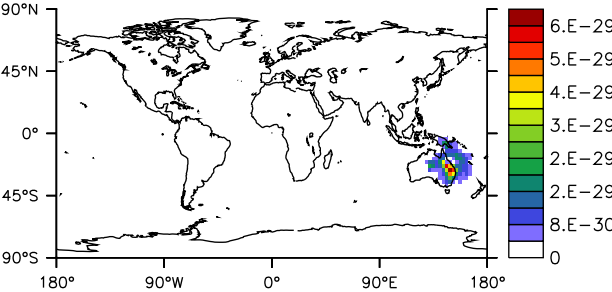

OLD:  $J(O_2)$

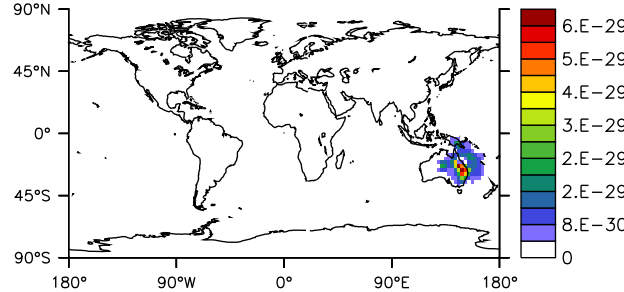

NEW:  $J(O_2)$

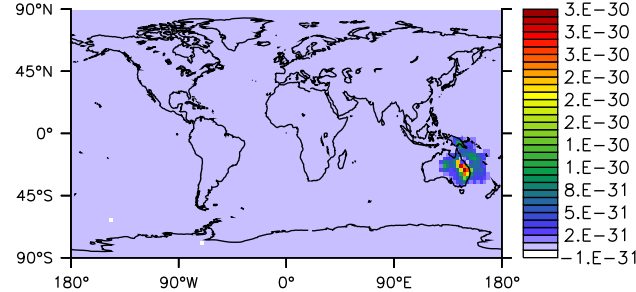

NEW-OLD

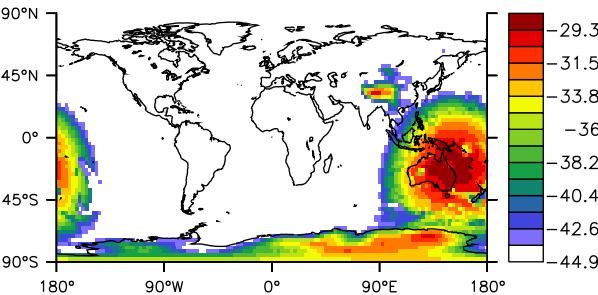

OLD:  $\lg(J(O_2))$

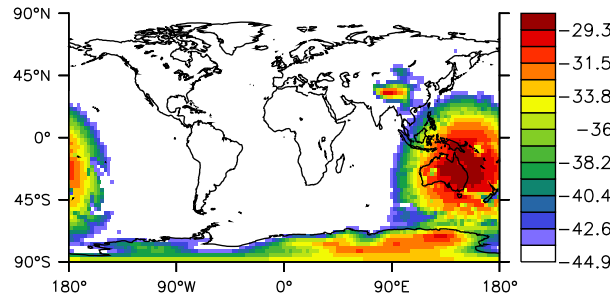

NEW:  $\lg(J(O_2))$

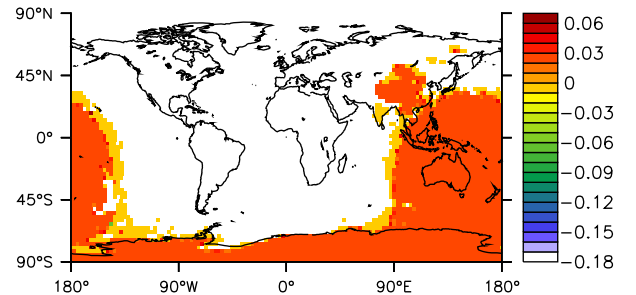

$\lg(\text{NEW}/\text{OLD})$

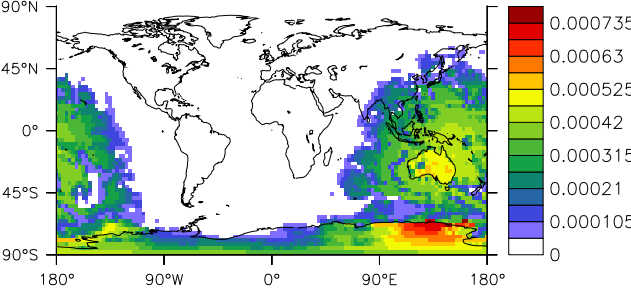

OLD:  $J(\text{O}^3\text{P})$

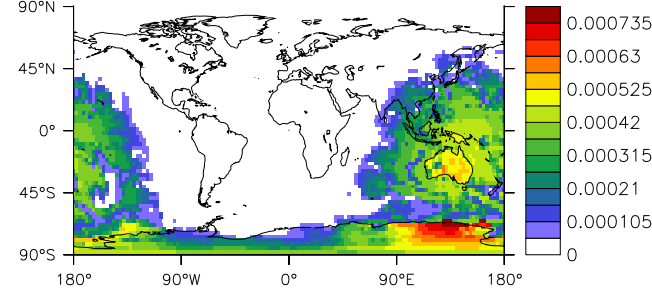

NEW:  $J(\text{O}^3\text{P})$

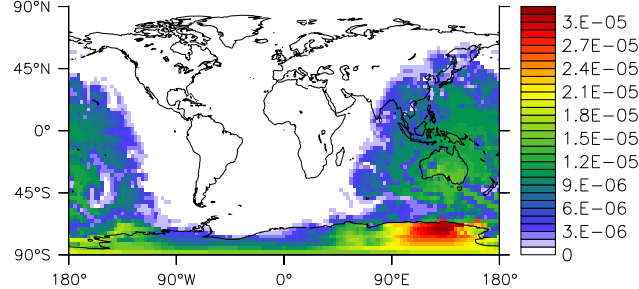

NEW-OLD

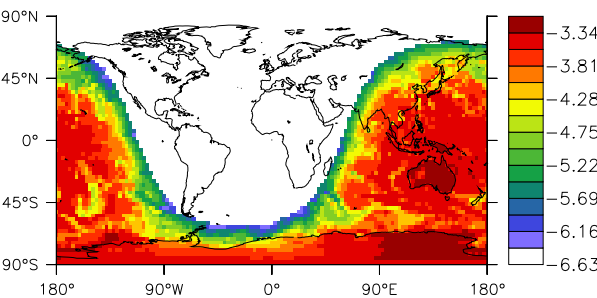

OLD:  $\lg(J(\text{O}^3\text{P}))$

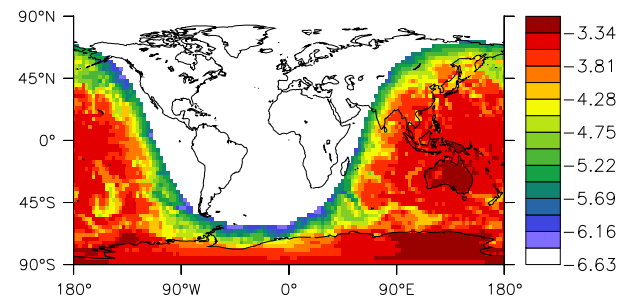

NEW:  $\lg(J(\text{O}^3\text{P}))$

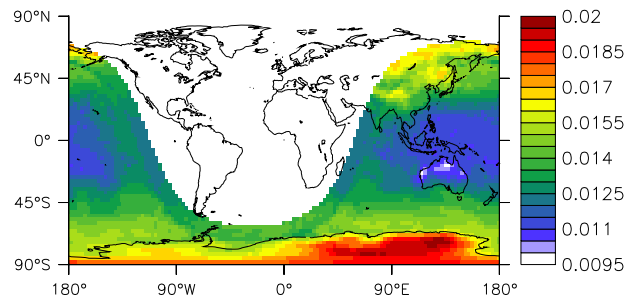

$\lg(\text{NEW}/\text{OLD})$

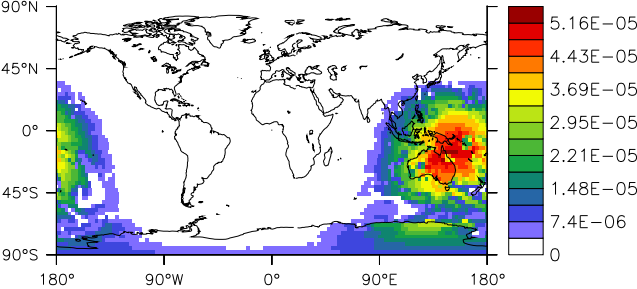

OLD:  $J(O^1D)$

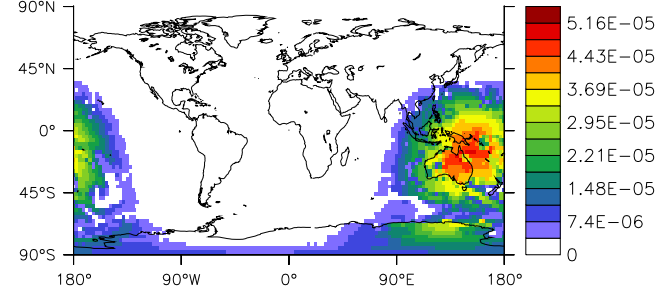

NEW:  $J(O^1D)$

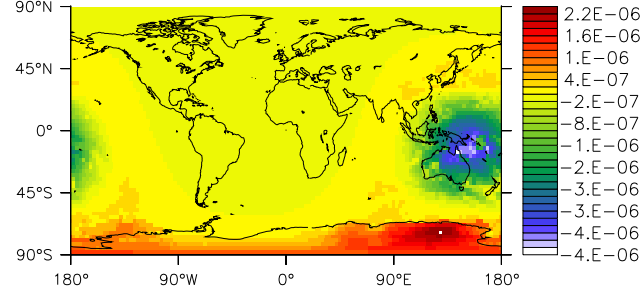

NEW-OLD

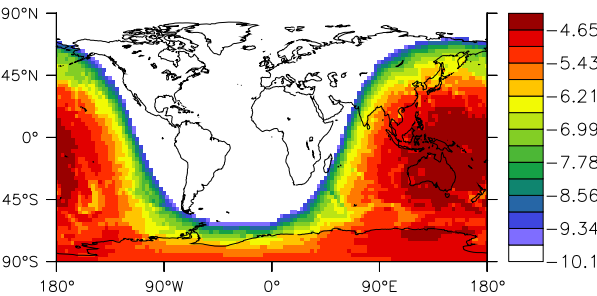

OLD:  $\lg(J(O^1D))$

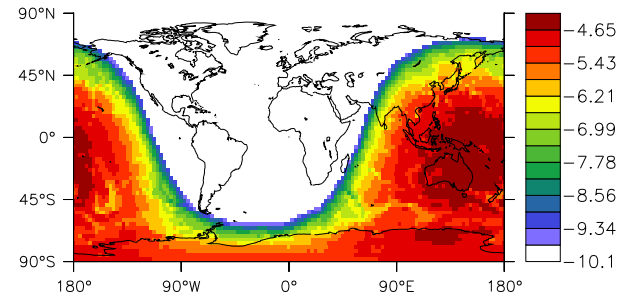

NEW:  $\lg(J(O^1D))$

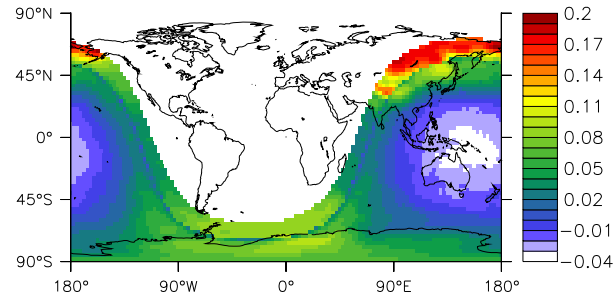

$\lg(\text{NEW}/\text{OLD})$

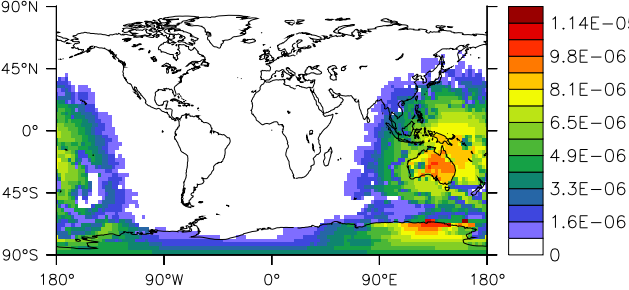

OLD:  $J(\text{H}_2\text{O}_2)$

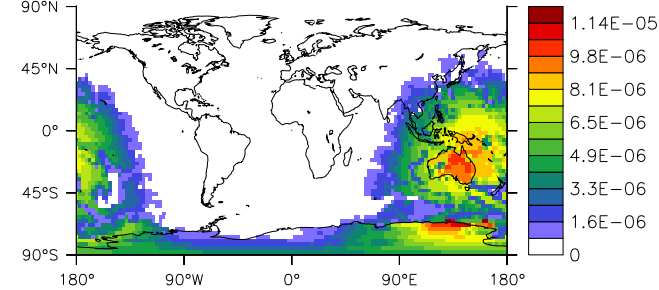

NEW:  $J(\text{H}_2\text{O}_2)$

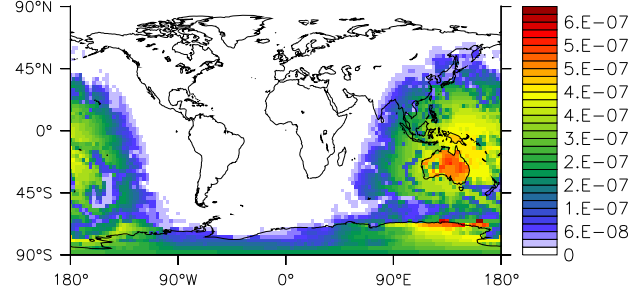

NEW-OLD

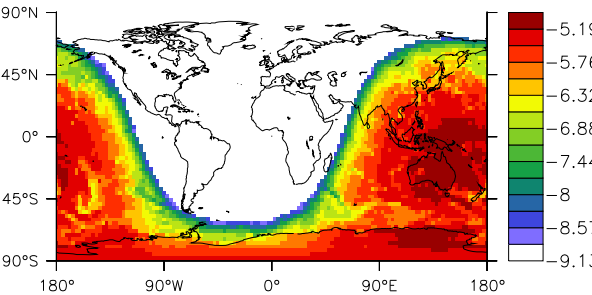

OLD:  $\lg(J(\text{H}_2\text{O}_2))$

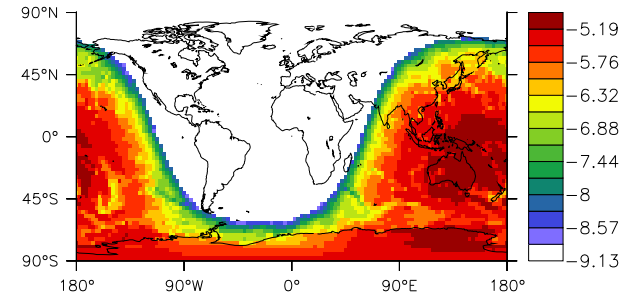

NEW:  $\lg(J(\text{H}_2\text{O}_2))$

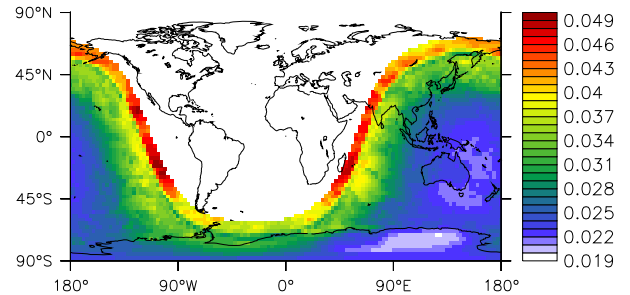

$\lg(\text{NEW}/\text{OLD})$



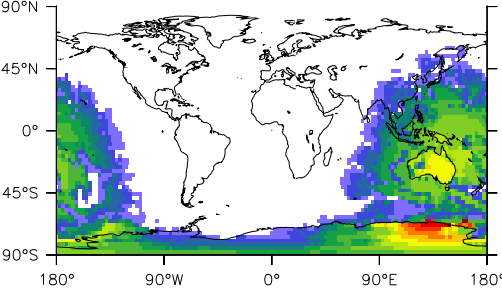

OLD:  $J(\text{NO}_2)$

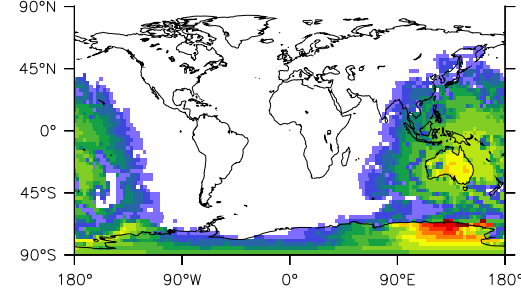

NEW:  $J(\text{NO}_2)$

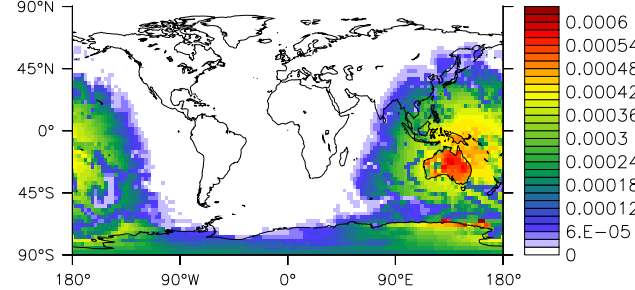

NEW-OLD

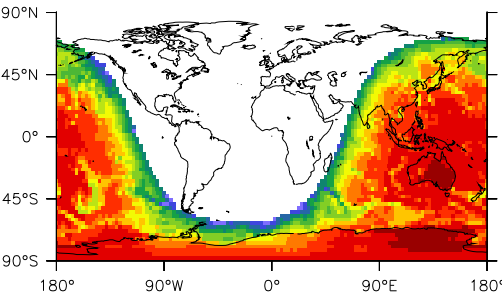

OLD:  $\lg(J(\text{NO}_2))$

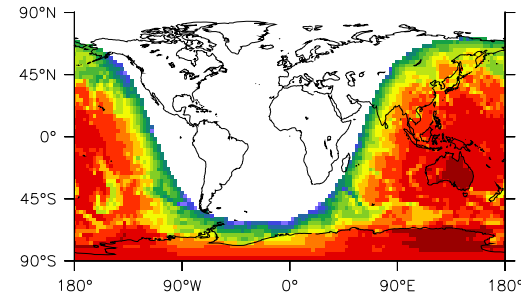

NEW:  $\lg(J(\text{NO}_2))$

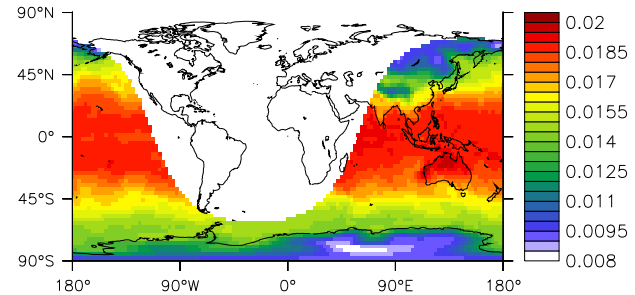

$\lg(\text{NEW}/\text{OLD})$

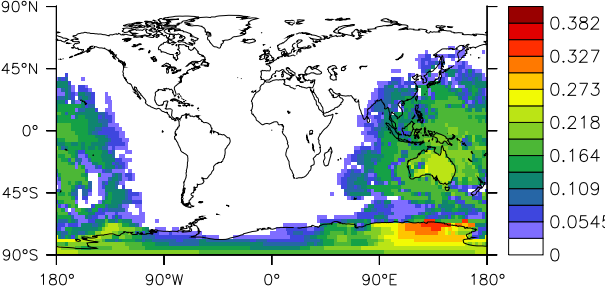

OLD:  $J(\text{NO}_2\text{O})$

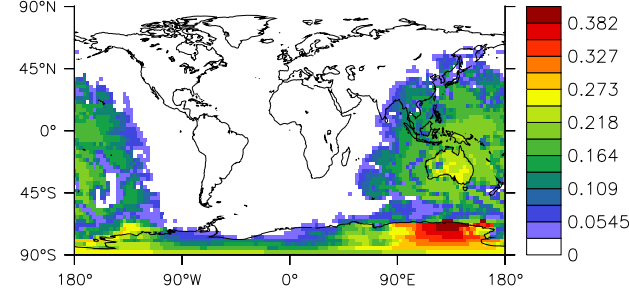

NEW:  $J(\text{NO}_2\text{O})$

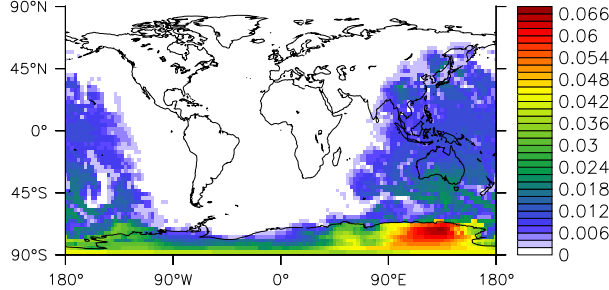

NEW-OLD

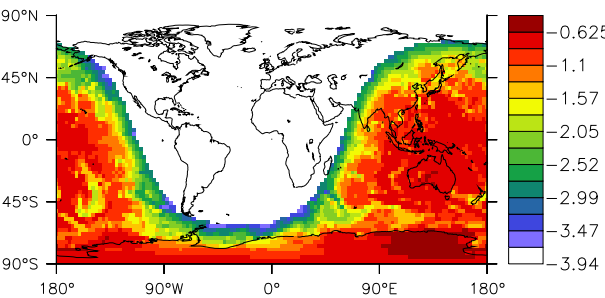

OLD:  $\lg(J(\text{NO}_2\text{O}))$

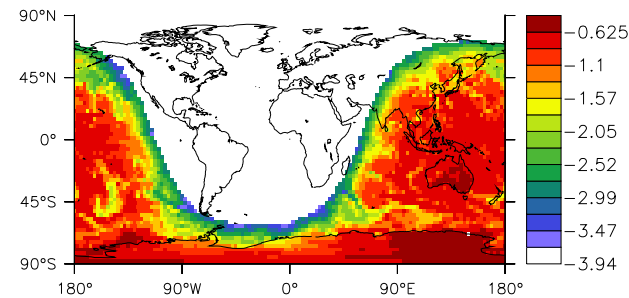

NEW:  $\lg(J(\text{NO}_2\text{O}))$

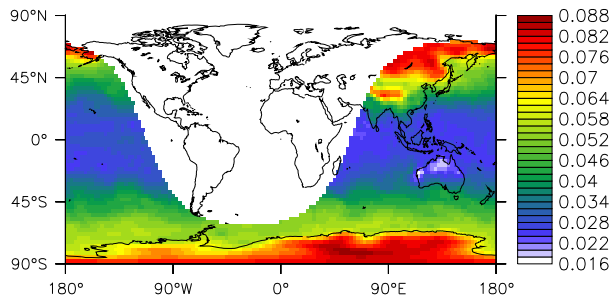

$\lg(\text{NEW}/\text{OLD})$

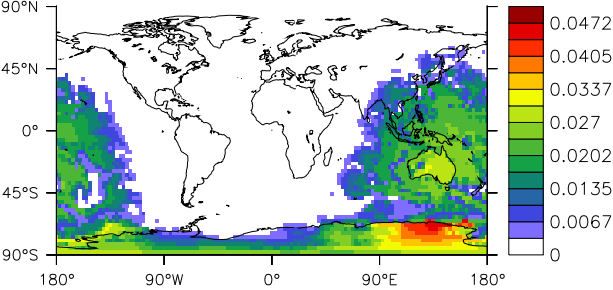

OLD:  $J(\text{NO}_2)$

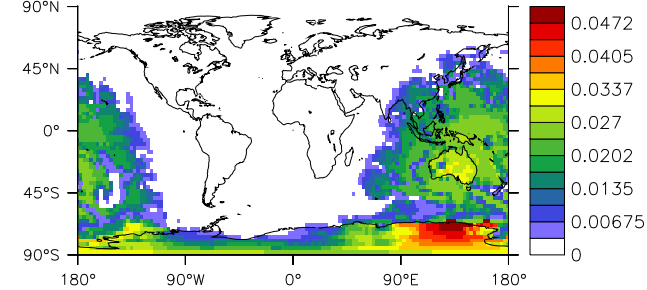

NEW:  $J(\text{NO}_2)$

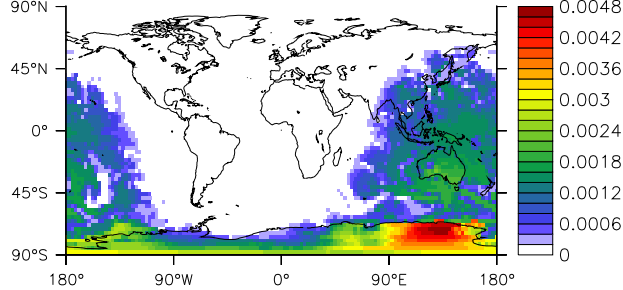

NEW-OLD

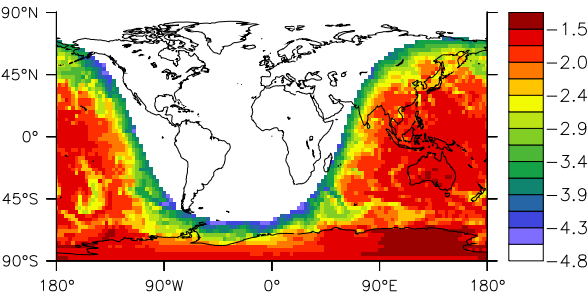

OLD:  $\lg(J(\text{NO}_2))$

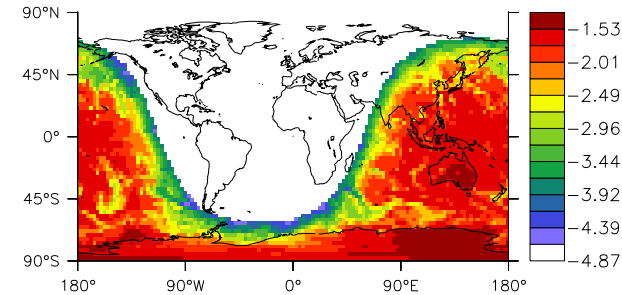

NEW:  $\lg(J(\text{NO}_2))$

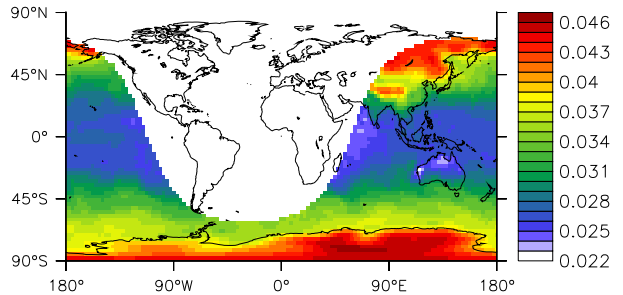

$\lg(\text{NEW}/\text{OLD})$

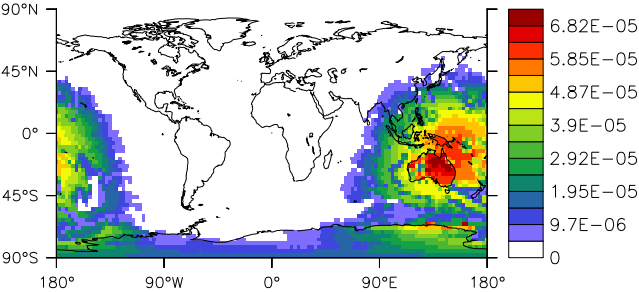

OLD:  $J(\text{N}_2\text{O}_5)$

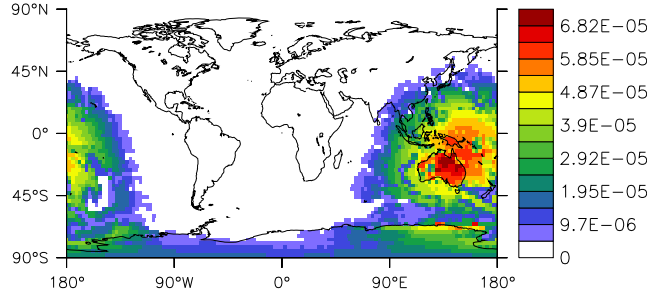

NEW:  $J(\text{N}_2\text{O}_5)$

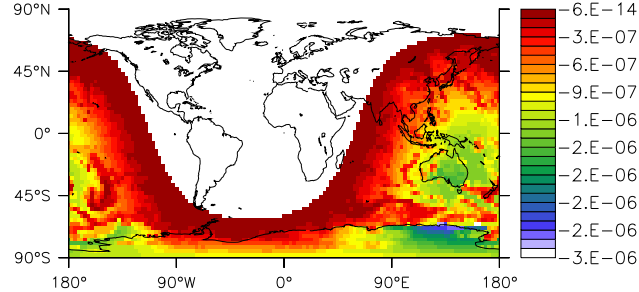

NEW-OLD

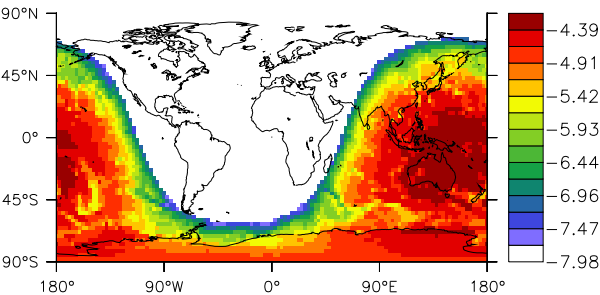

OLD:  $\lg(J(\text{N}_2\text{O}_5))$

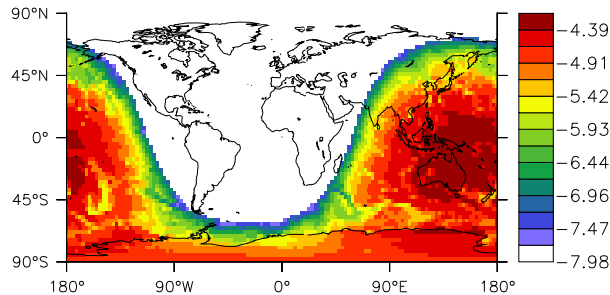

NEW:  $\lg(J(\text{N}_2\text{O}_5))$

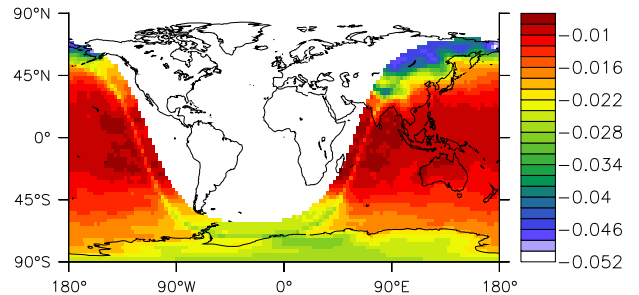

$\lg(\text{NEW}/\text{OLD})$

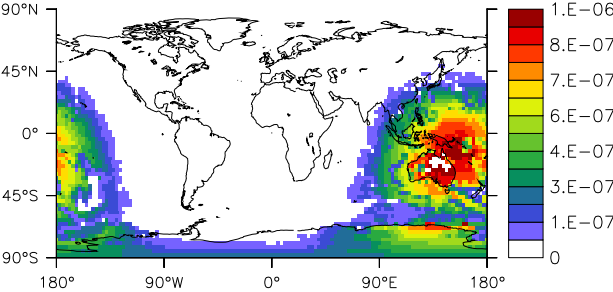

OLD:  $J(\text{HNO}_3)$

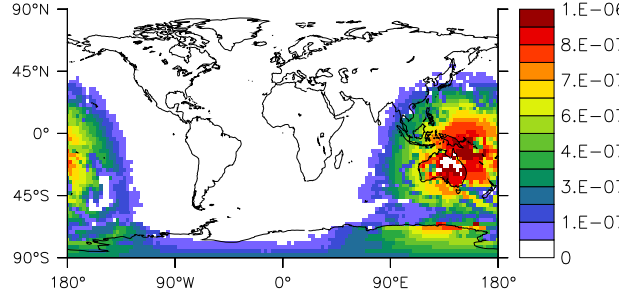

NEW:  $J(\text{HNO}_3)$

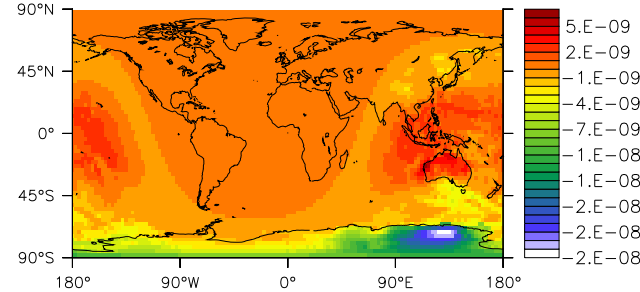

NEW-OLD

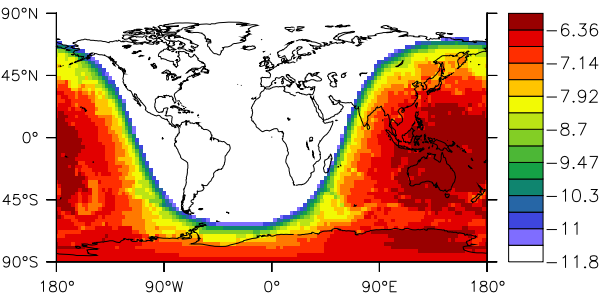

OLD:  $\lg(J(\text{HNO}_3))$

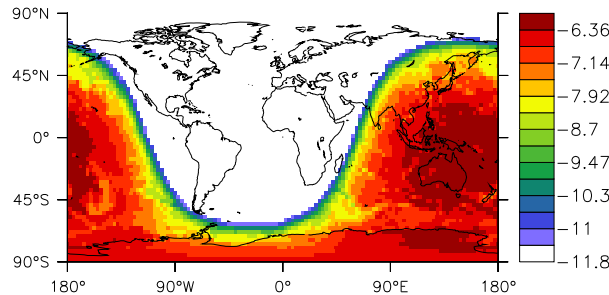

NEW:  $\lg(J(\text{HNO}_3))$

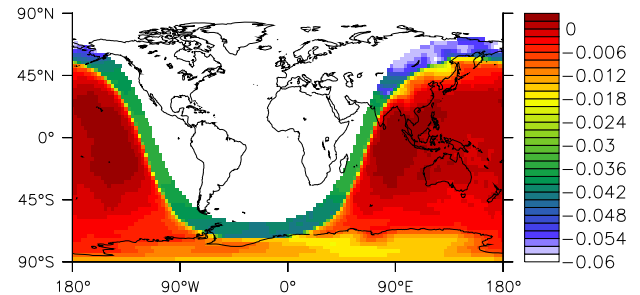

$\lg(\text{NEW}/\text{OLD})$

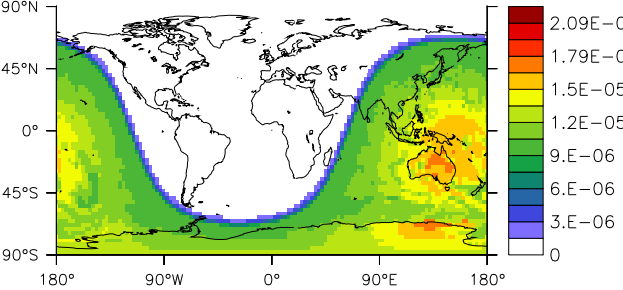

OLD:  $J(\text{HNO}_4)$

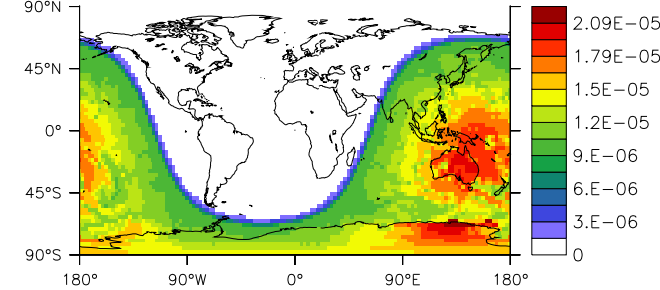

NEW:  $J(\text{HNO}_4)$

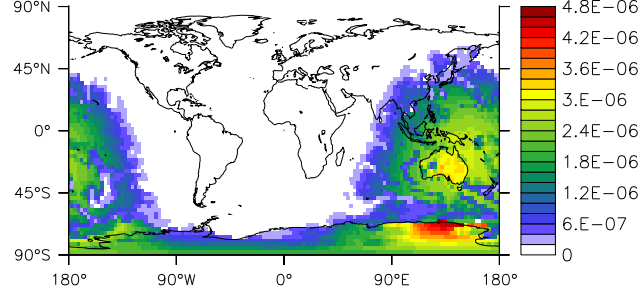

NEW-OLD

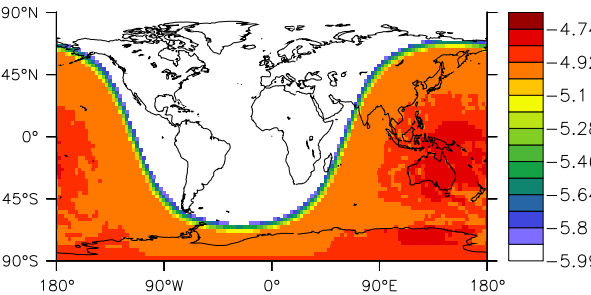

OLD:  $\lg(J(\text{HNO}_4))$

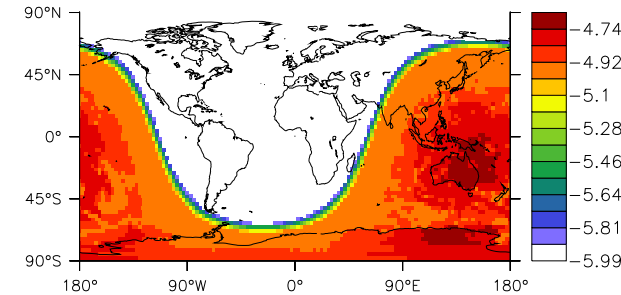

NEW:  $\lg(J(\text{HNO}_4))$

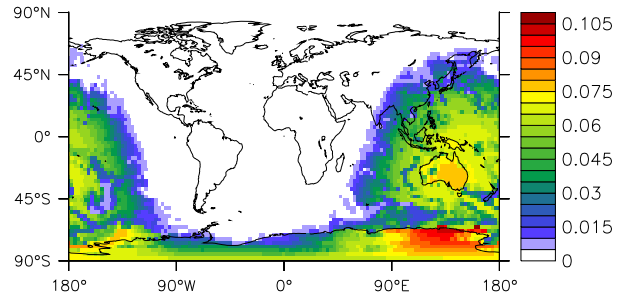

$\lg(\text{NEW}/\text{OLD})$

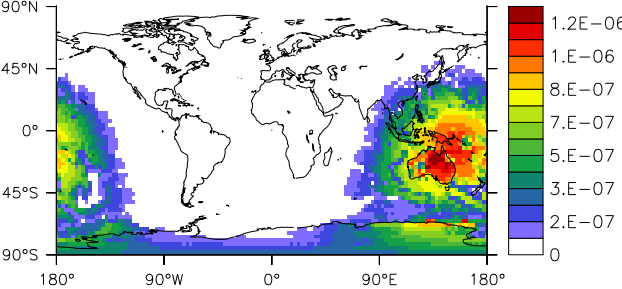

OLD: J(PAN)

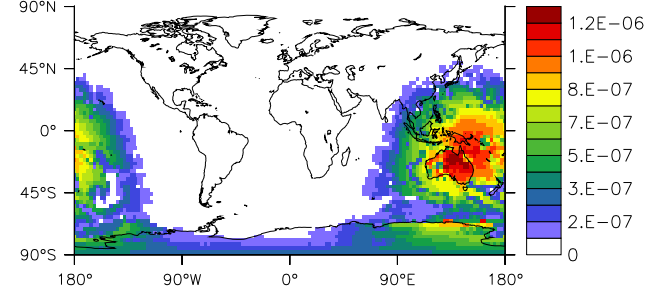

NEW: J(PAN)

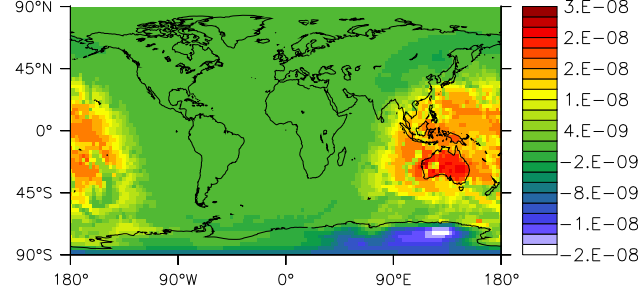

NEW-OLD

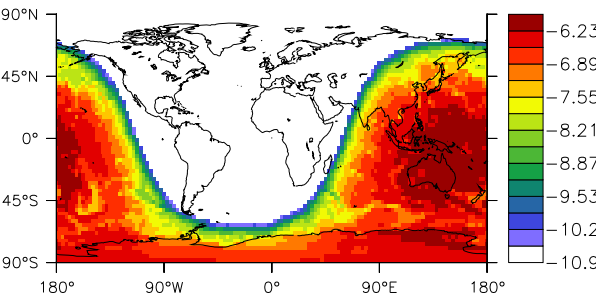

OLD:  $\lg(J(PAN))$

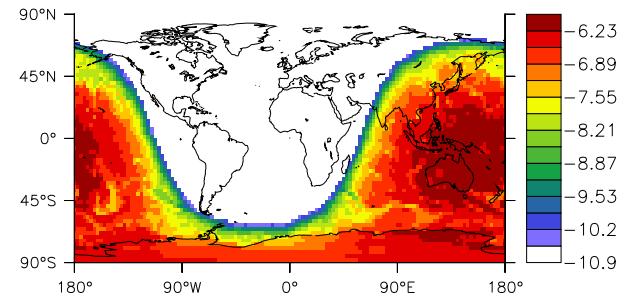

NEW:  $\lg(J(PAN))$

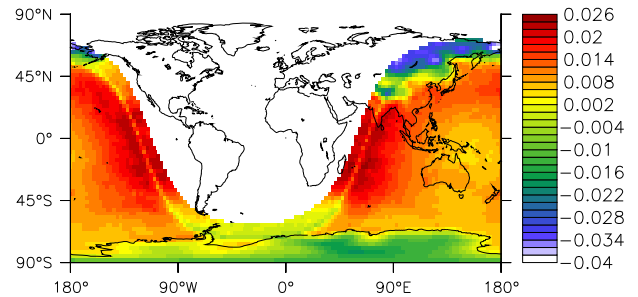

$\lg(NEW/OLD)$

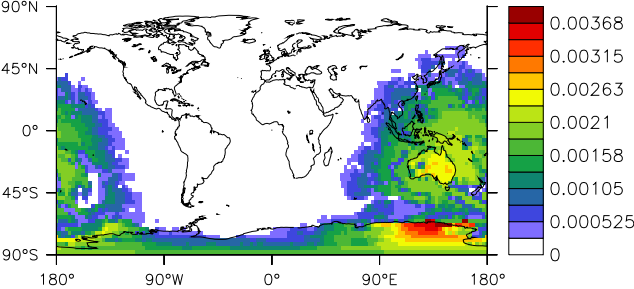

OLD: J(HONO)

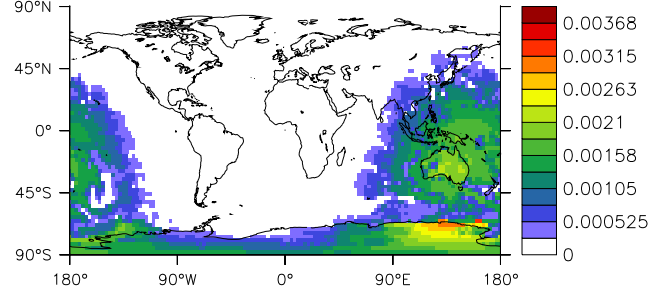

NEW: J(HONO)

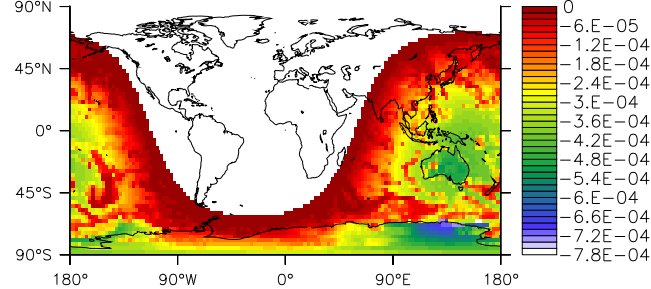

NEW-OLD

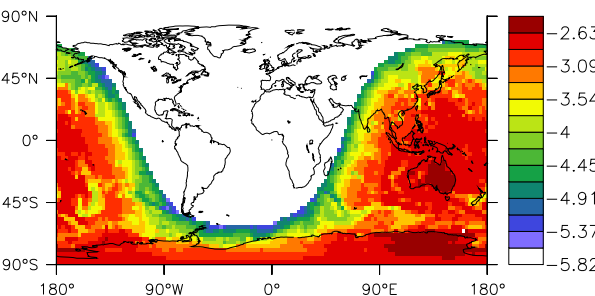

OLD: lg(J(HONO))

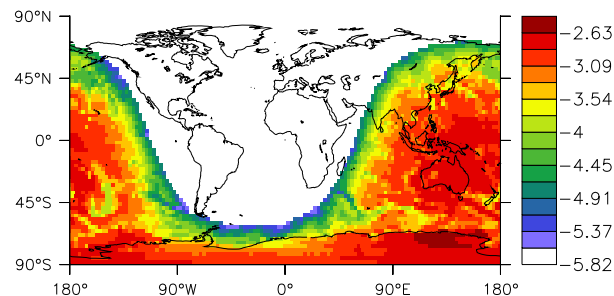

NEW: lg(J(HONO))

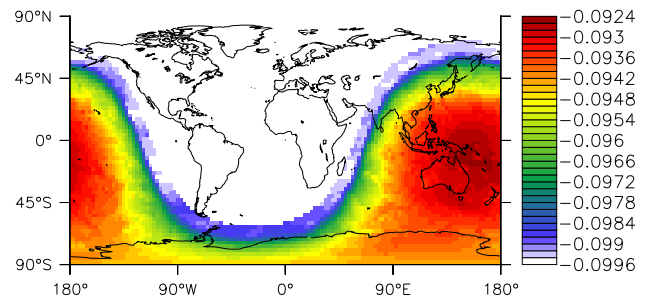

lg(NEW/OLD)



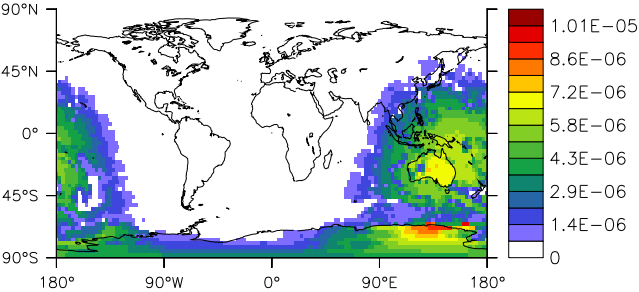

OLD:  $J(\text{CH}_3\text{OOH})$

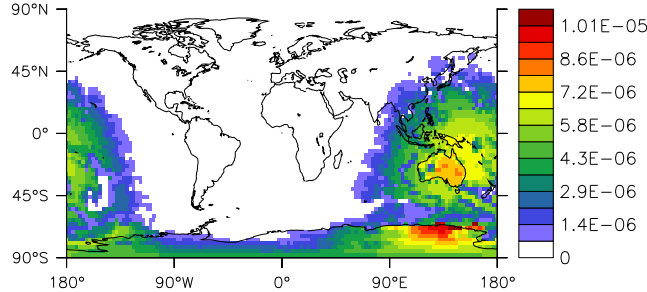

NEW:  $J(\text{CH}_3\text{OOH})$

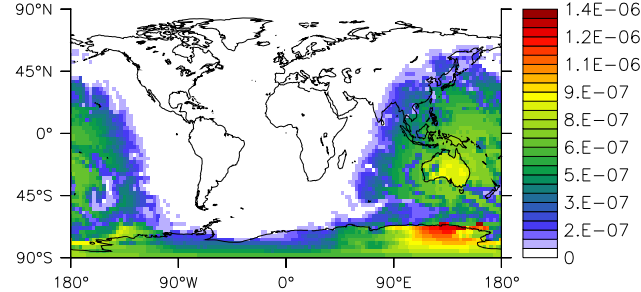

NEW-OLD

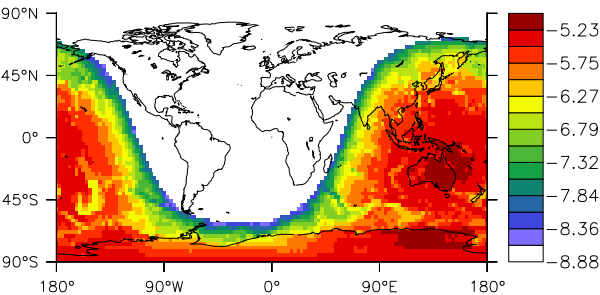

OLD:  $\lg(J(\text{CH}_3\text{OOH}))$

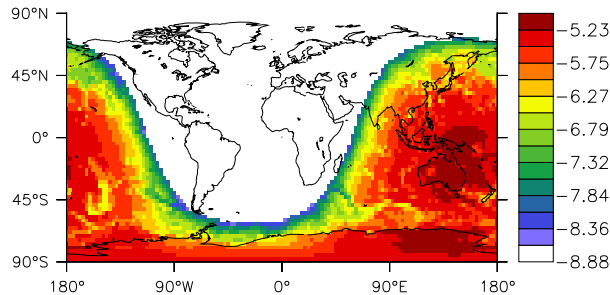

NEW:  $\lg(J(\text{CH}_3\text{OOH}))$

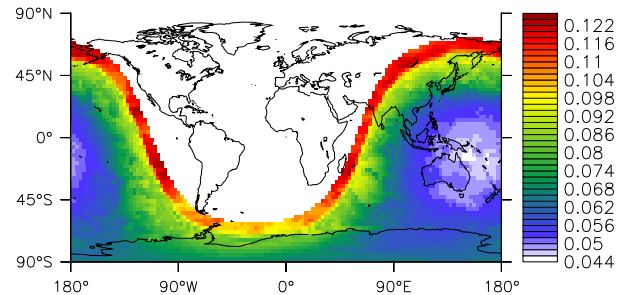

$\lg(\text{NEW}/\text{OLD})$

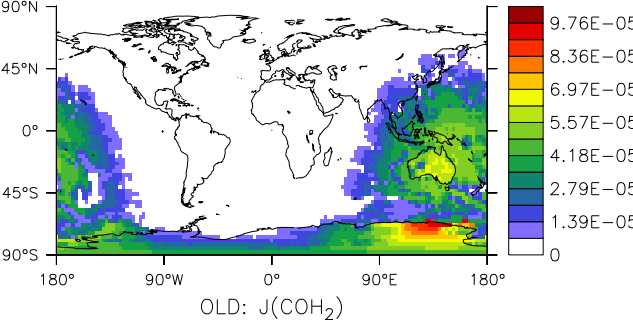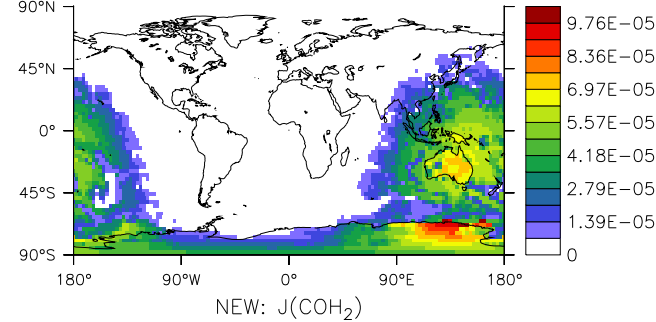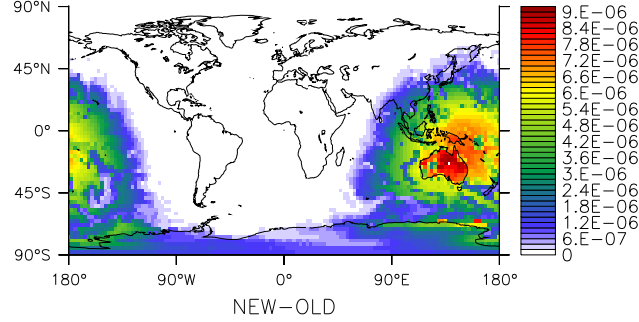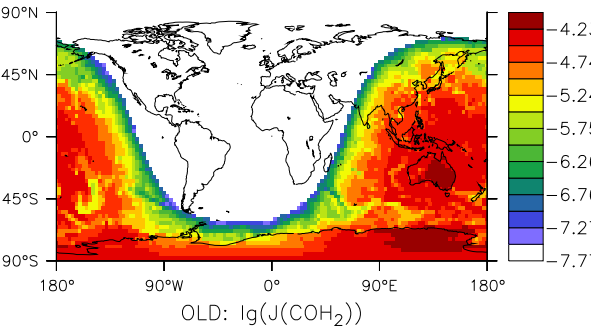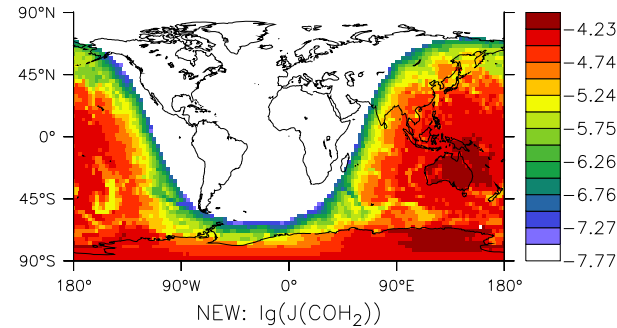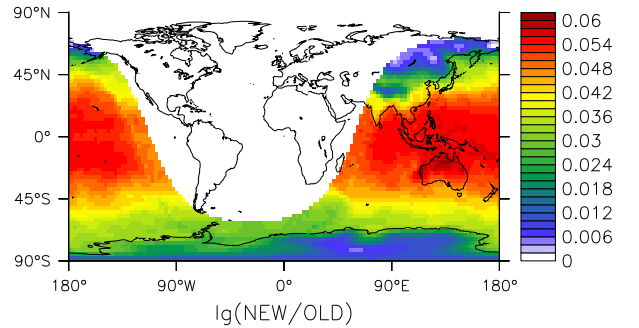

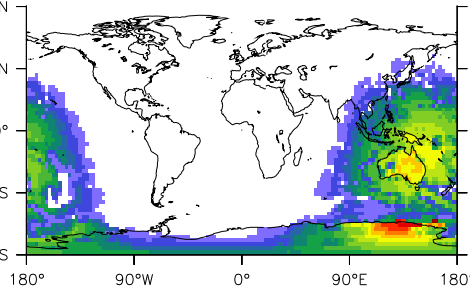

OLD:  $J(\text{CHOH})$

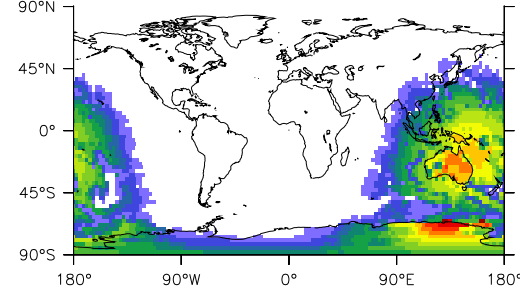

NEW:  $J(\text{CHOH})$

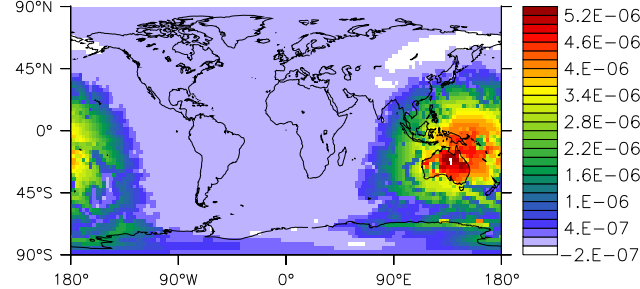

NEW-OLD

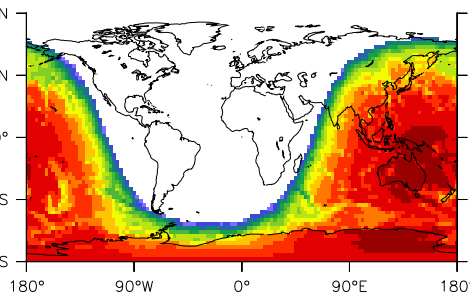

OLD:  $\lg(J(\text{CHOH}))$

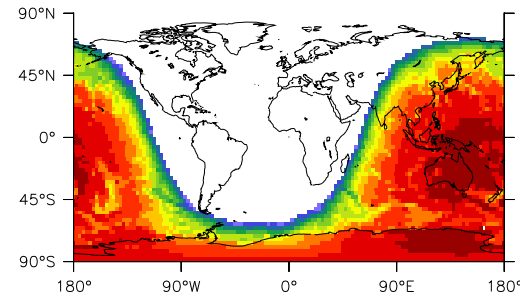

NEW:  $\lg(J(\text{CHOH}))$

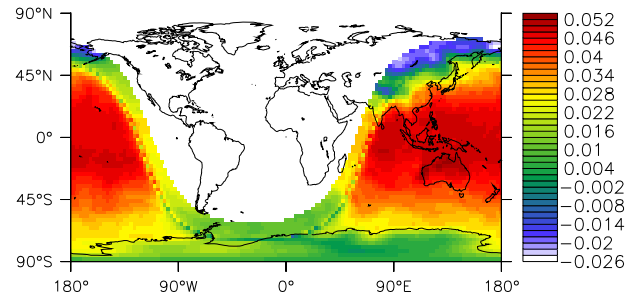

$\lg(\text{NEW}/\text{OLD})$

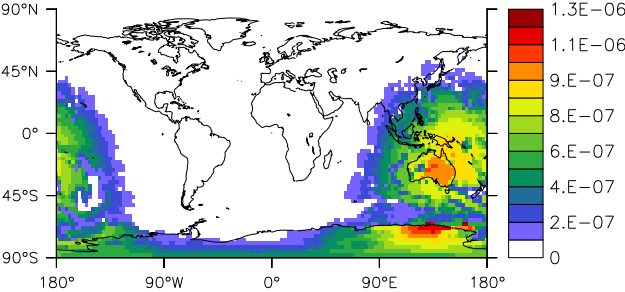

OLD:  $J(\text{CH}_3\text{CO}_3\text{H})$

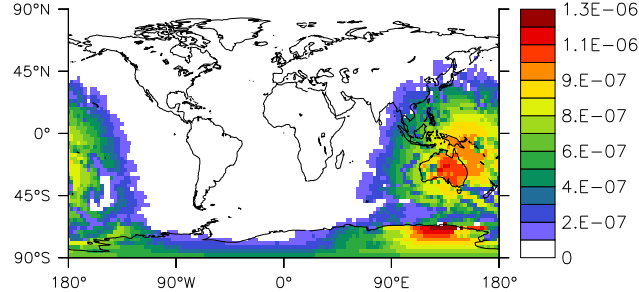

NEW:  $J(\text{CH}_3\text{CO}_3\text{H})$

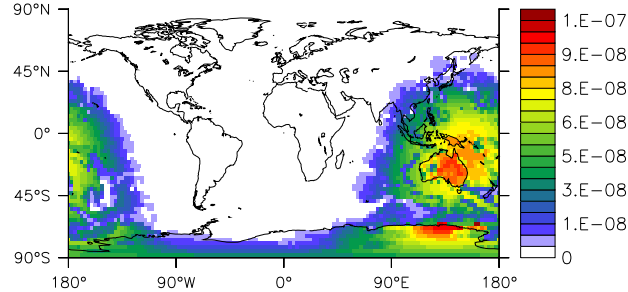

NEW-OLD

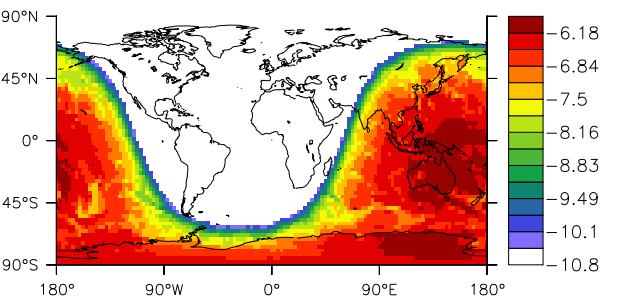

OLD:  $\lg(J(\text{CH}_3\text{CO}_3\text{H}))$

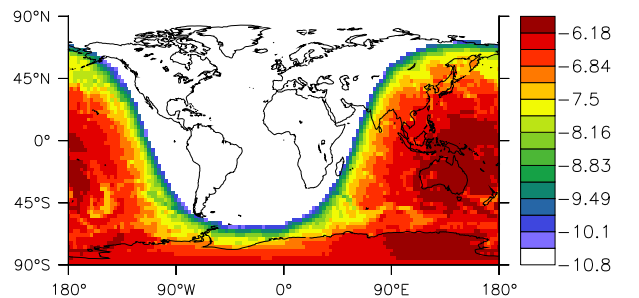

NEW:  $\lg(J(\text{CH}_3\text{CO}_3\text{H}))$

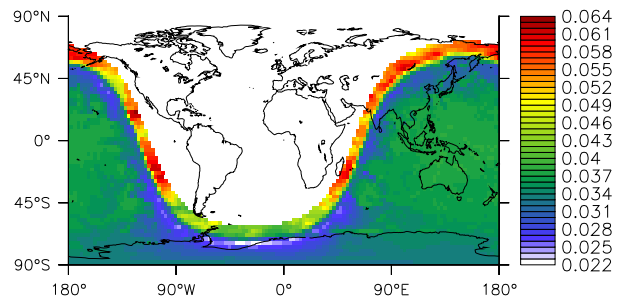

$\lg(\text{NEW}/\text{OLD})$

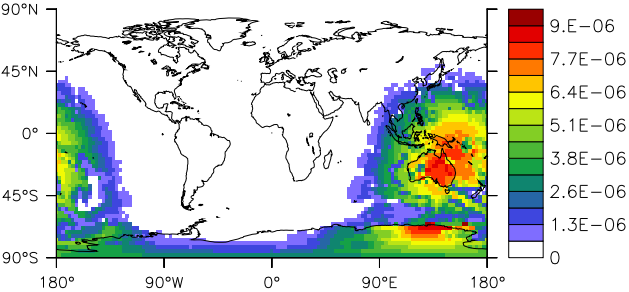

OLD:  $J(\text{CH}_3\text{CHO})$

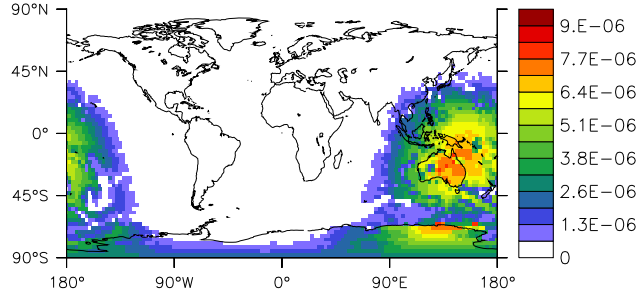

NEW:  $J(\text{CH}_3\text{CHO})$

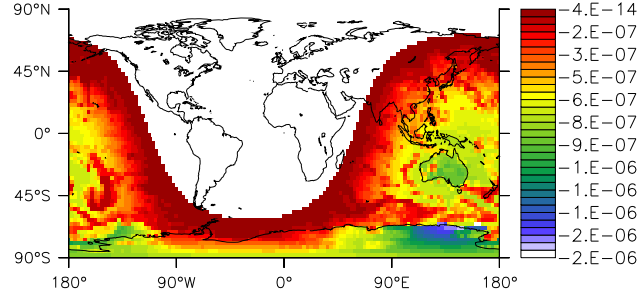

NEW-OLD

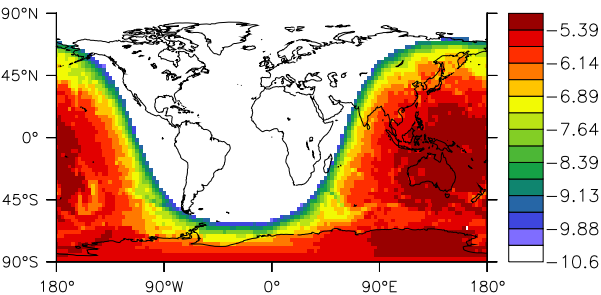

OLD:  $\lg(J(\text{CH}_3\text{CHO}))$

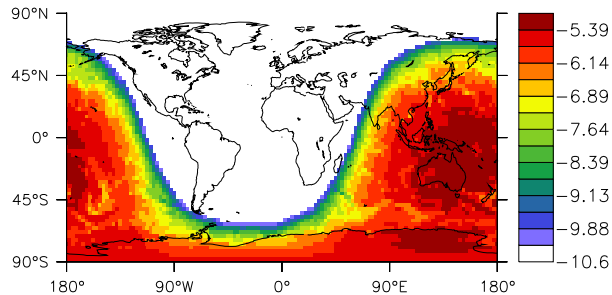

NEW:  $\lg(J(\text{CH}_3\text{CHO}))$

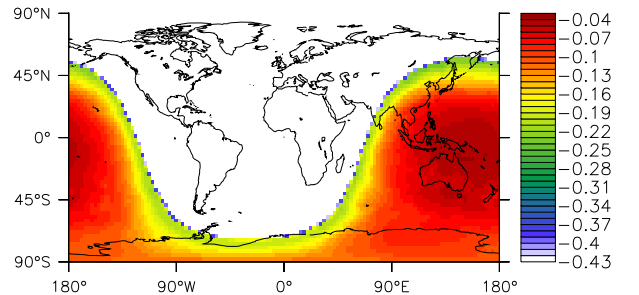

$\lg(\text{NEW}/\text{OLD})$

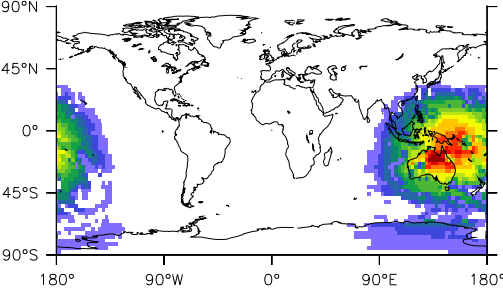

OLD:  $J(\text{CH}_3\text{COCH}_3)$

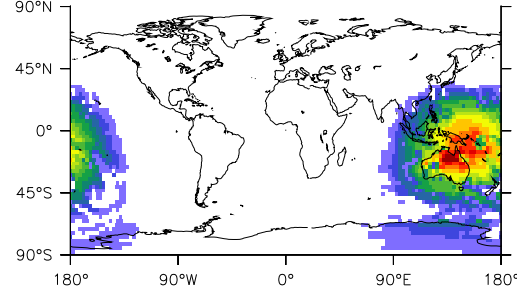

NEW:  $J(\text{CH}_3\text{COCH}_3)$

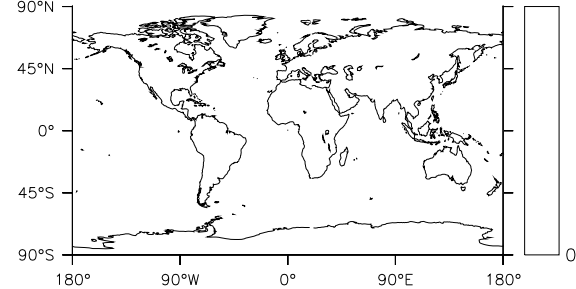

NEW-OLD

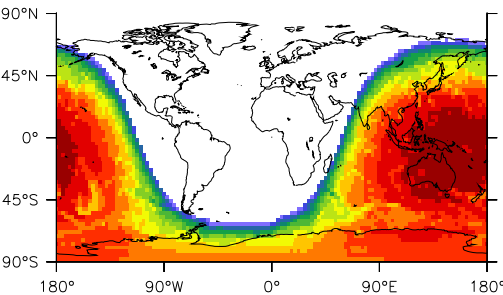

OLD:  $\lg(J(\text{CH}_3\text{COCH}_3))$

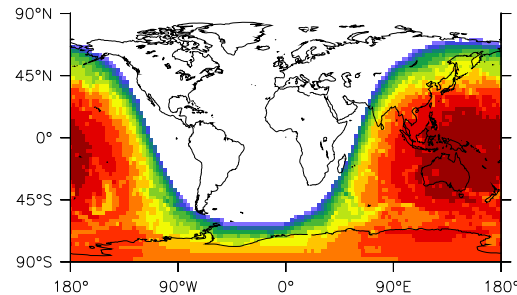

NEW:  $\lg(J(\text{CH}_3\text{COCH}_3))$

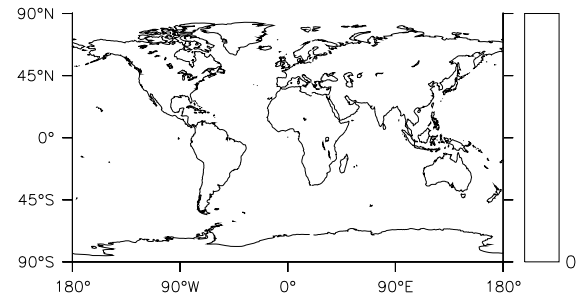

$\lg(\text{NEW}/\text{OLD})$

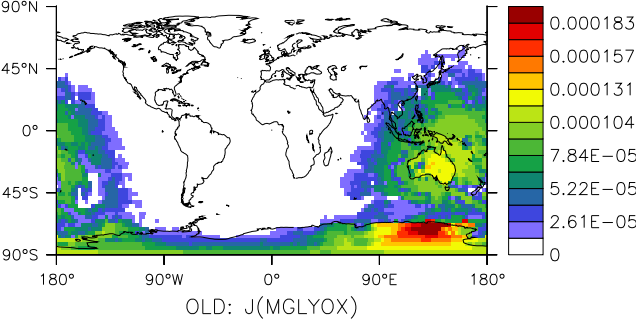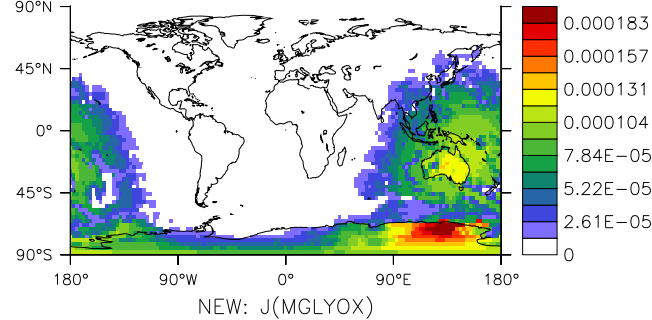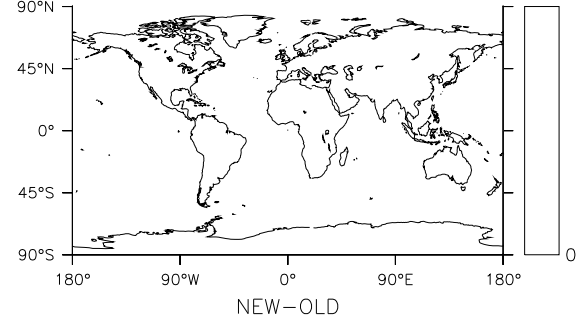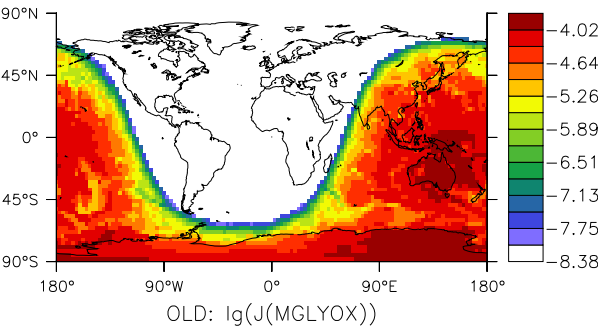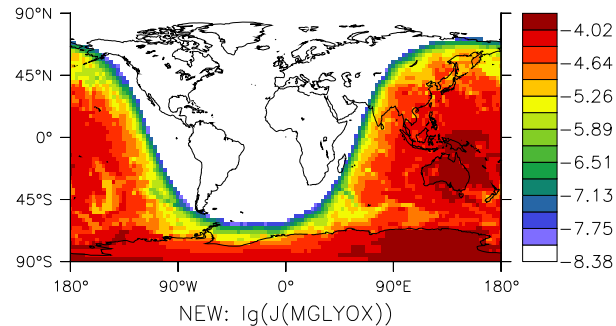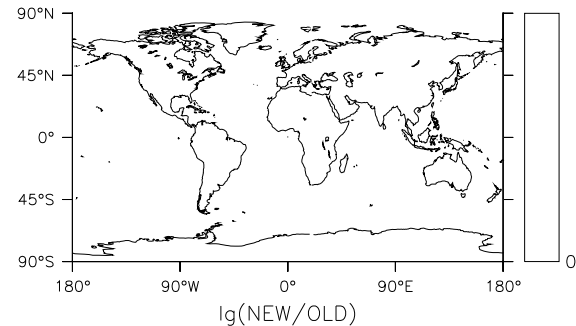

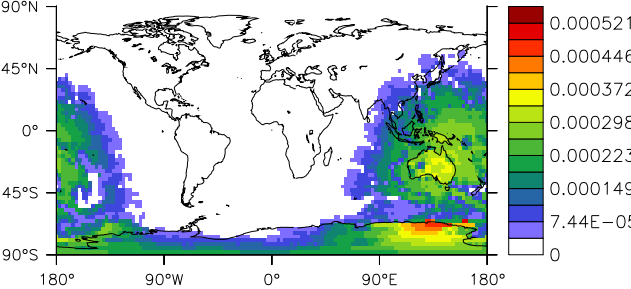

OLD:  $J(\text{HOCl})$

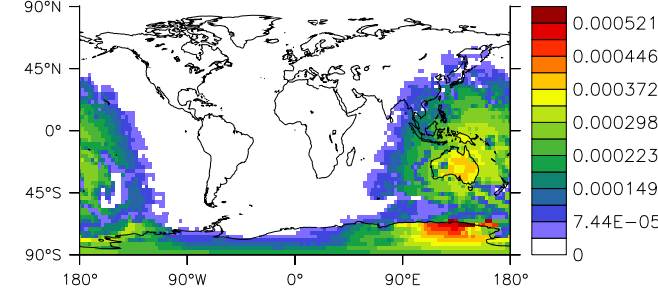

NEW:  $J(\text{HOCl})$

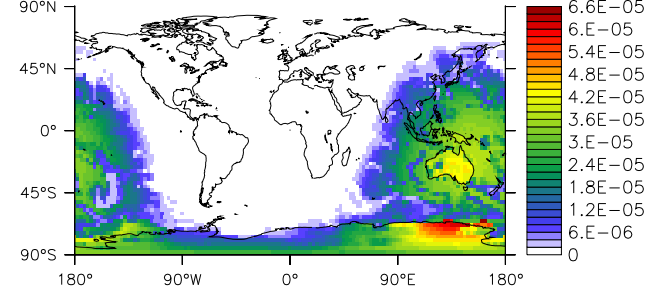

NEW-OLD

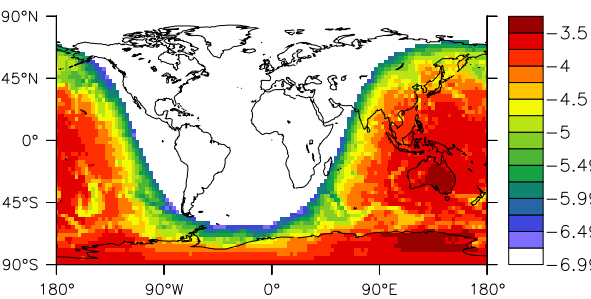

OLD:  $\lg(J(\text{HOCl}))$

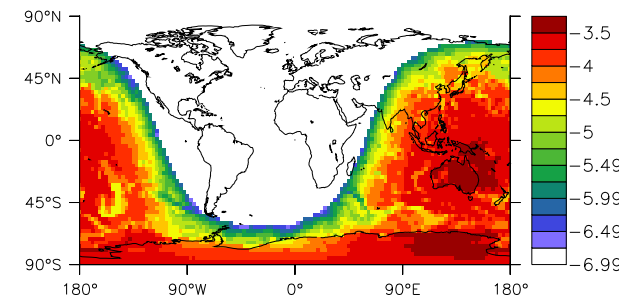

NEW:  $\lg(J(\text{HOCl}))$

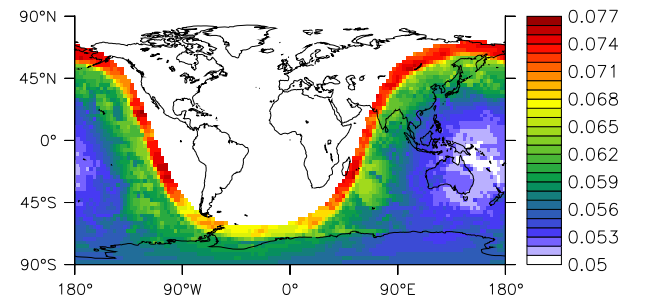

$\lg(\text{NEW}/\text{OLD})$



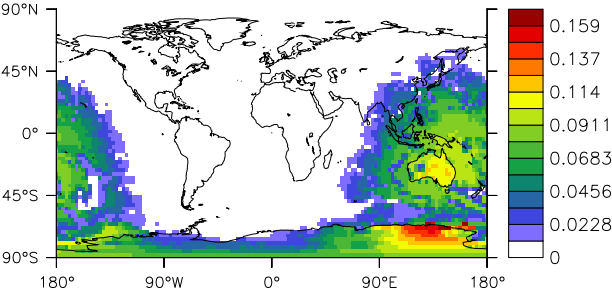

OLD: J(OCIO)

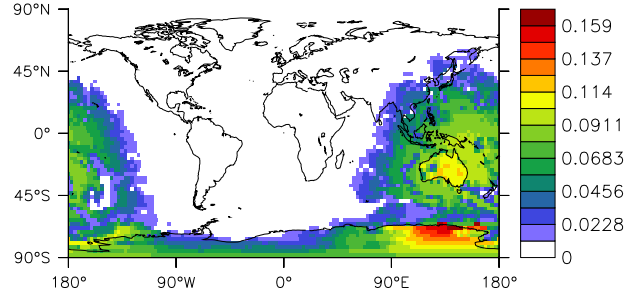

NEW: J(OCIO)

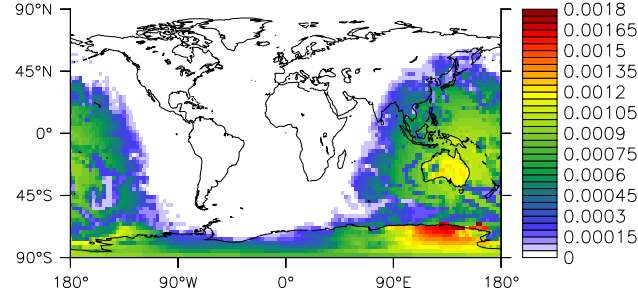

NEW-OLD

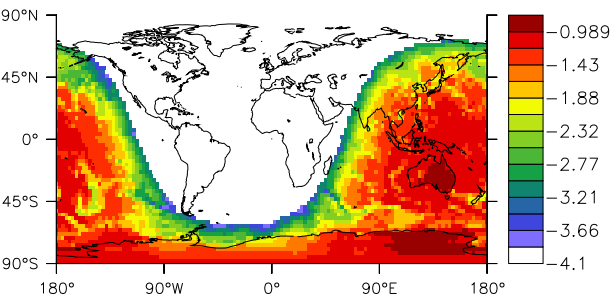

OLD:  $\lg(J(OCIO))$

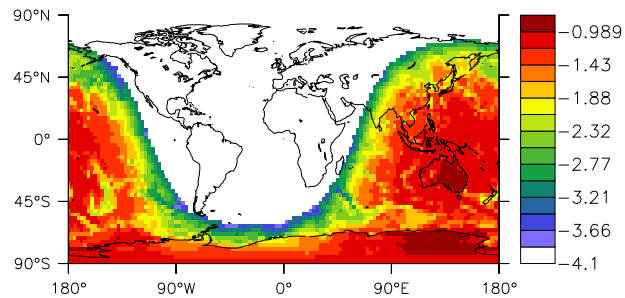

NEW:  $\lg(J(OCIO))$

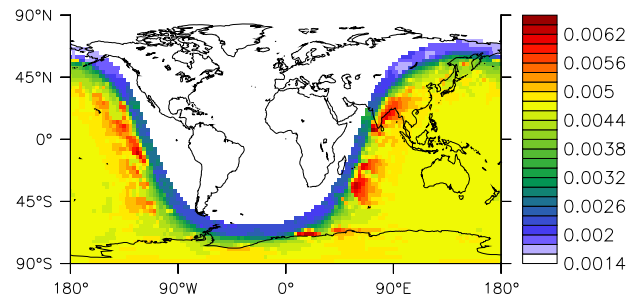

$\lg(\text{NEW}/\text{OLD})$

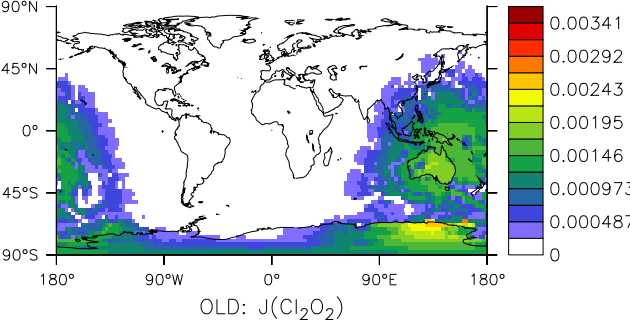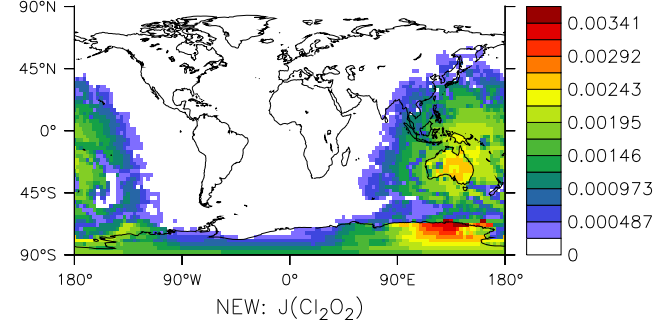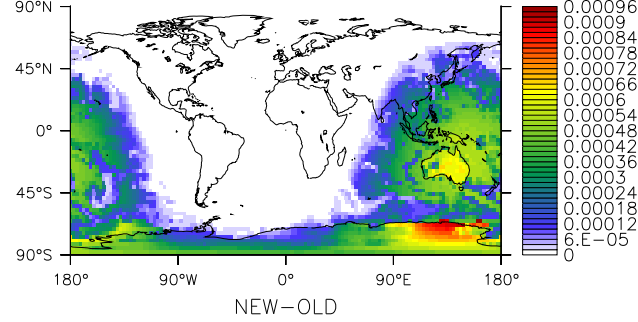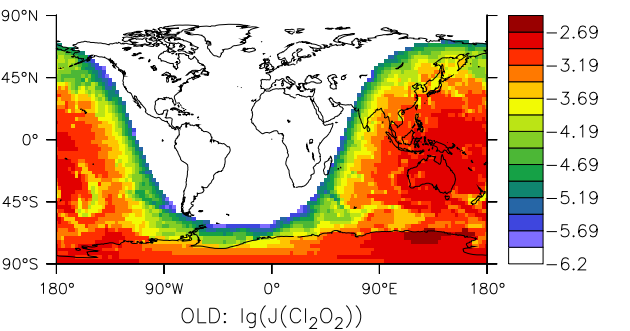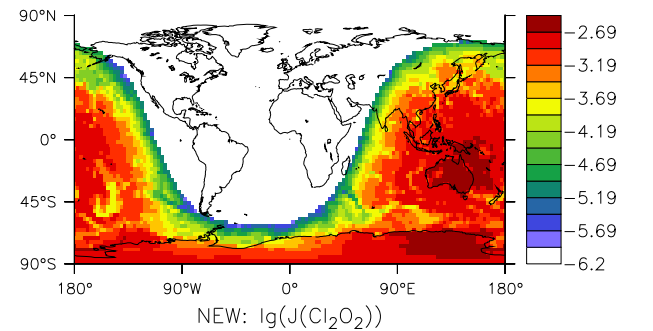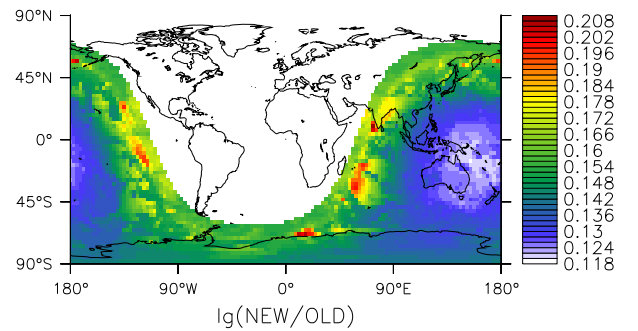

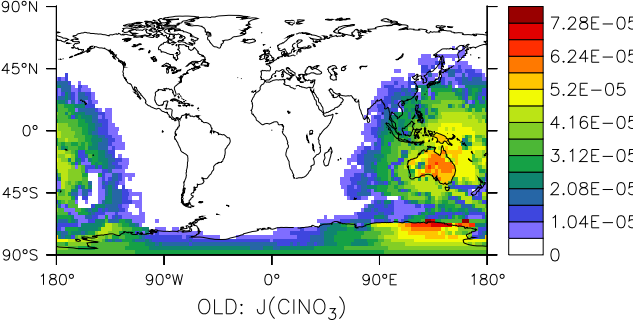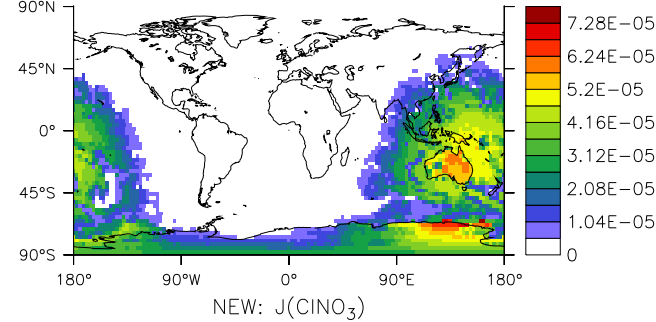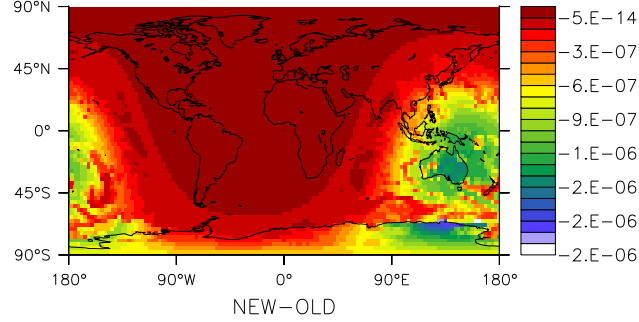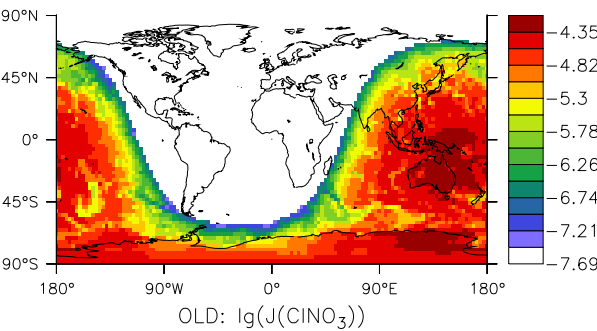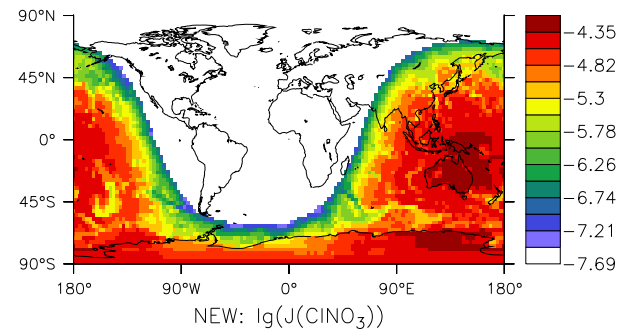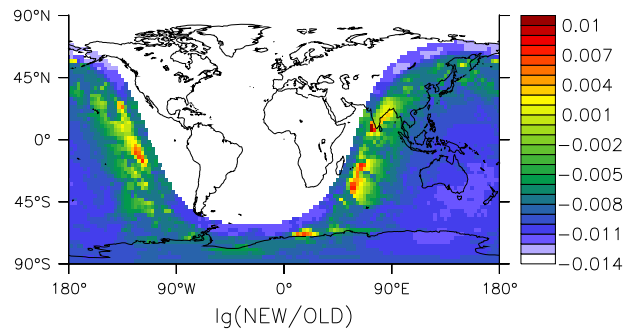

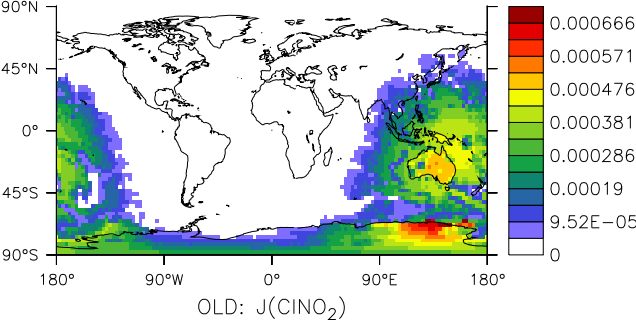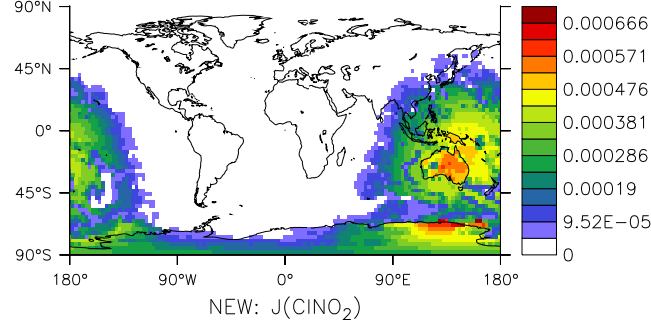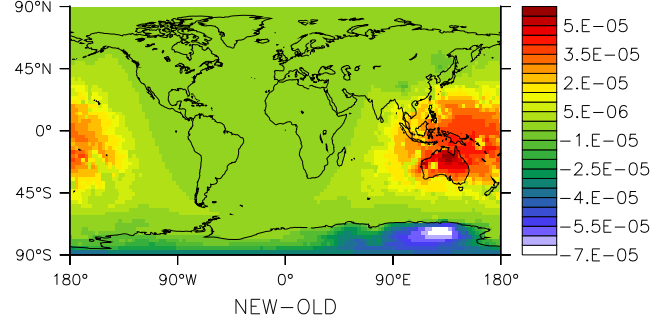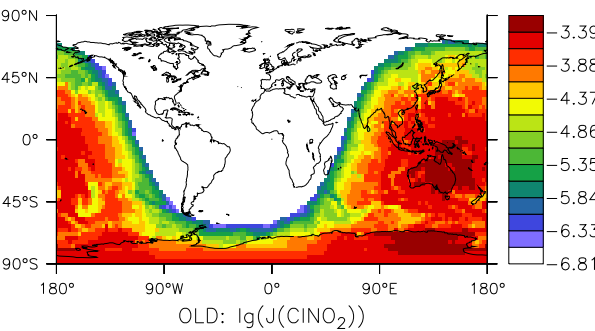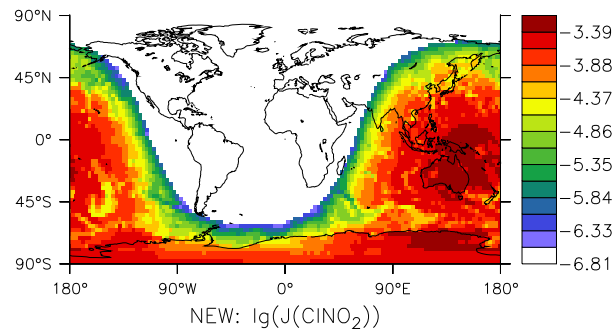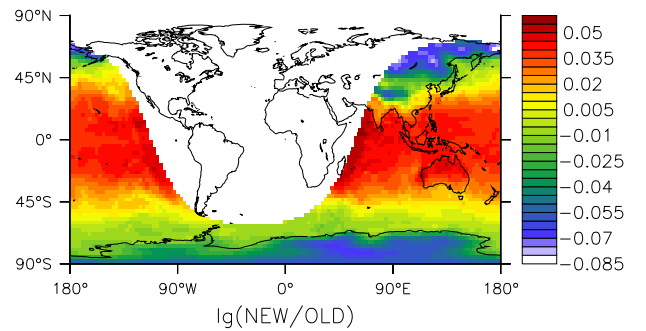

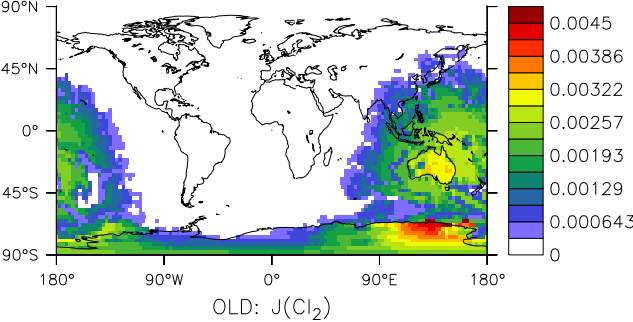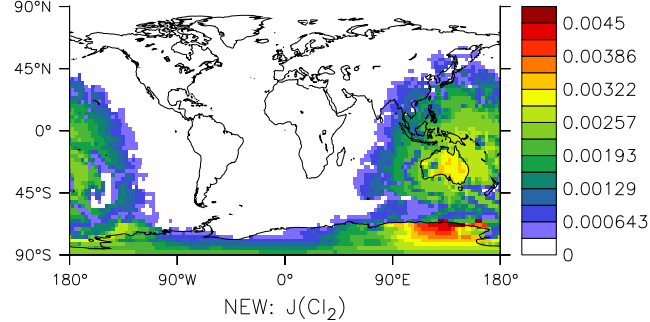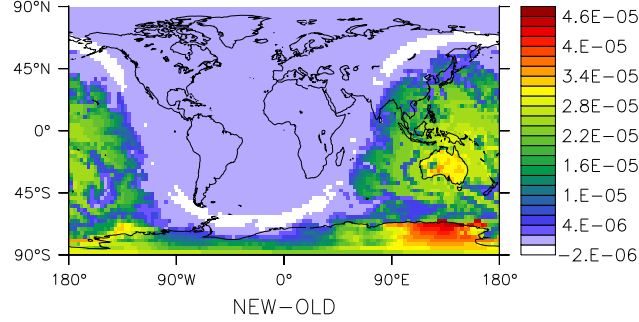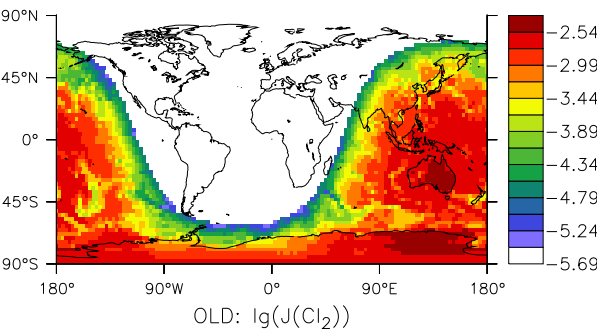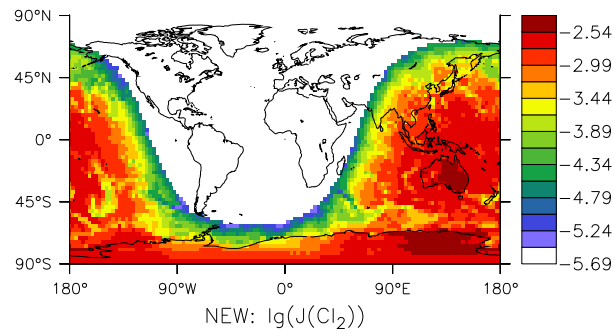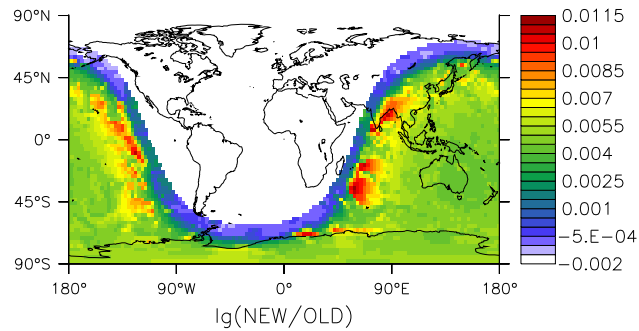

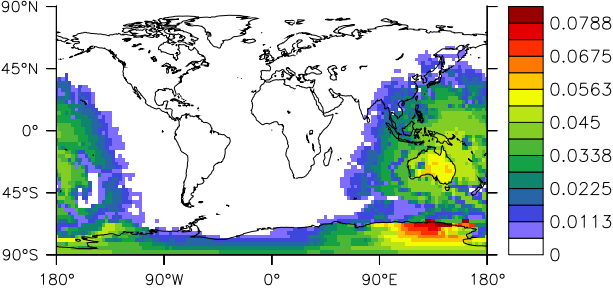

OLD:  $J(\text{BrO})$

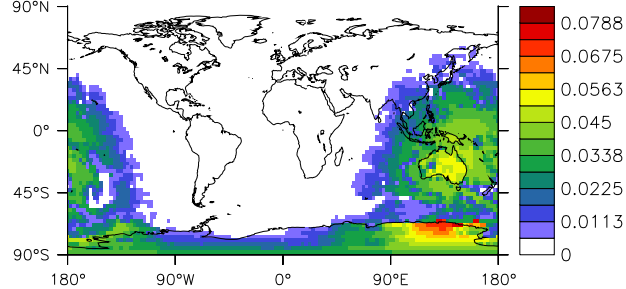

NEW:  $J(\text{BrO})$

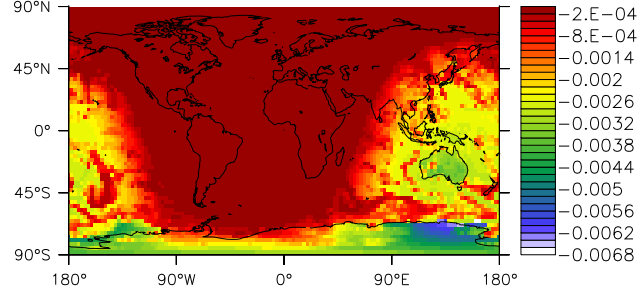

NEW-OLD

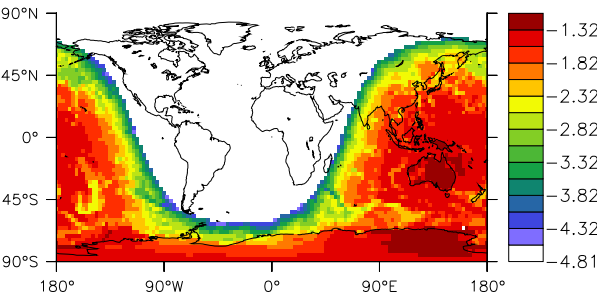

OLD:  $\lg(J(\text{BrO}))$

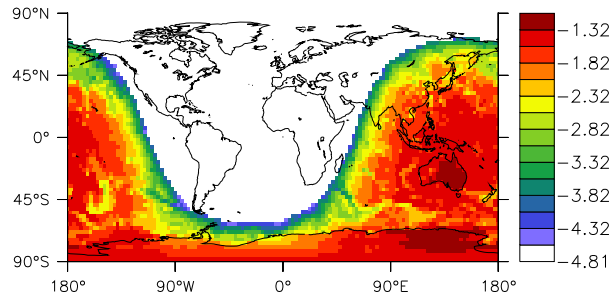

NEW:  $\lg(J(\text{BrO}))$

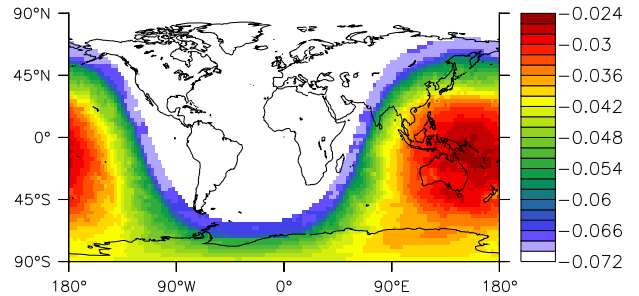

$\lg(\text{NEW}/\text{OLD})$

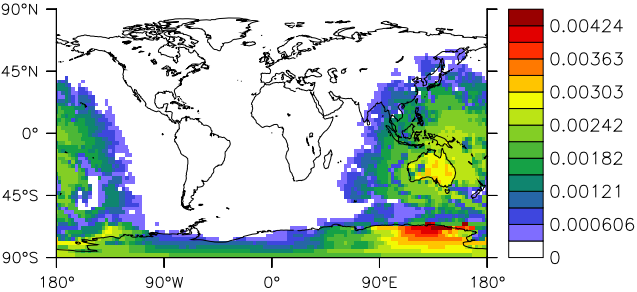

OLD:  $J(\text{HOBr})$

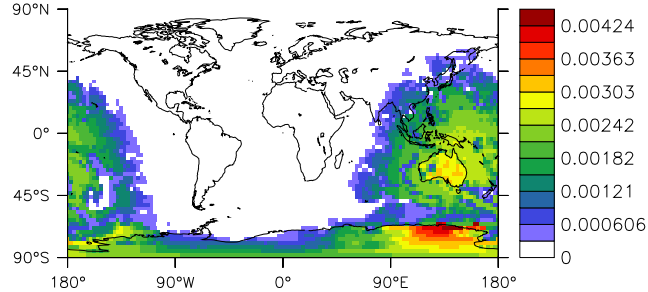

NEW:  $J(\text{HOBr})$

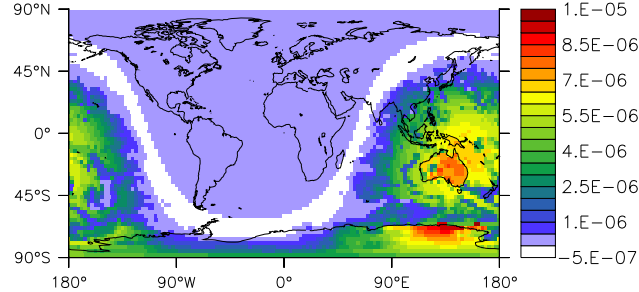

NEW-OLD

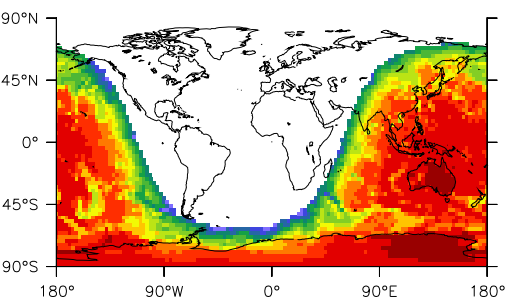

OLD:  $\lg(J(\text{HOBr}))$

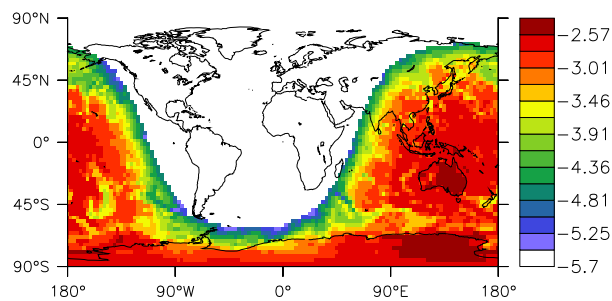

NEW:  $\lg(J(\text{HOBr}))$

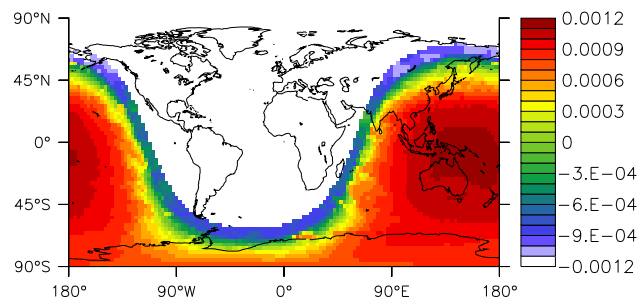

$\lg(\text{NEW}/\text{OLD})$

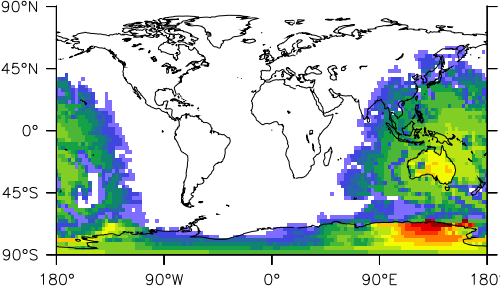

OLD:  $J(\text{BrCl})$

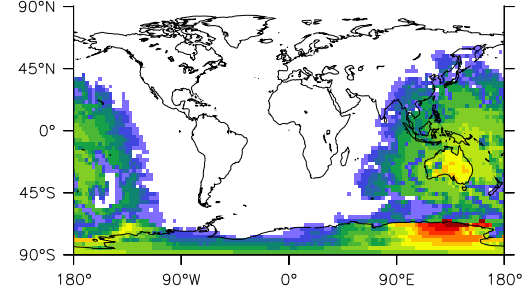

NEW:  $J(\text{BrCl})$

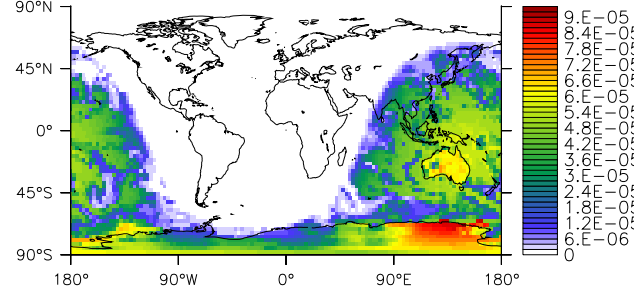

NEW-OLD

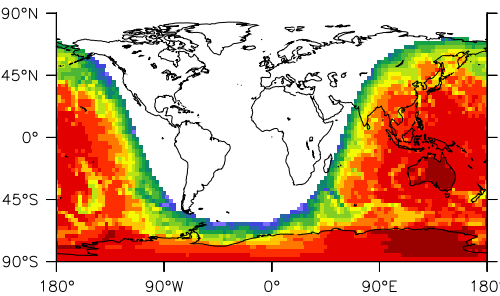

OLD:  $\lg(J(\text{BrCl}))$

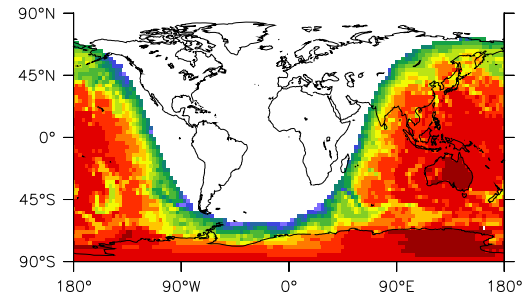

NEW:  $\lg(J(\text{BrCl}))$

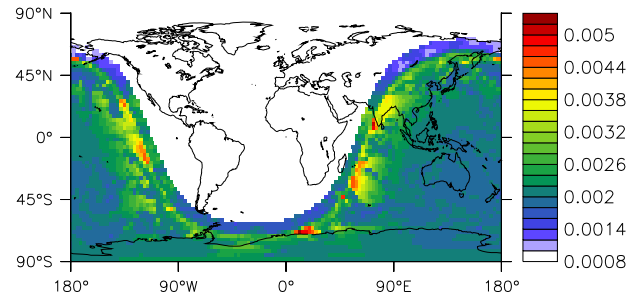

$\lg(\text{NEW}/\text{OLD})$



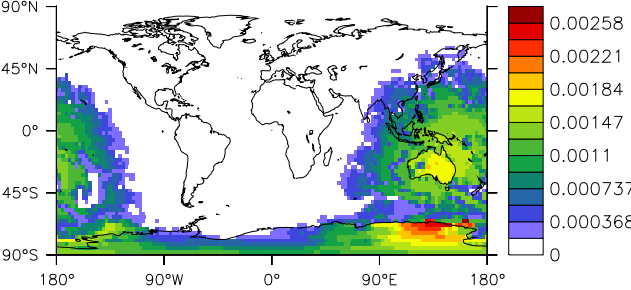

OLD:  $J(\text{BrNO}_3)$

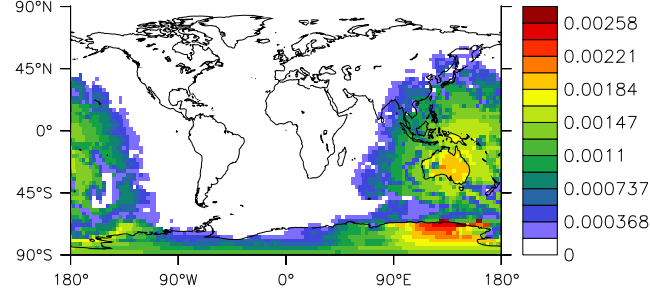

NEW:  $J(\text{BrNO}_3)$

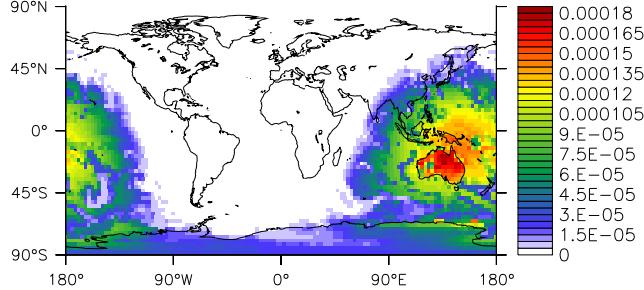

NEW-OLD

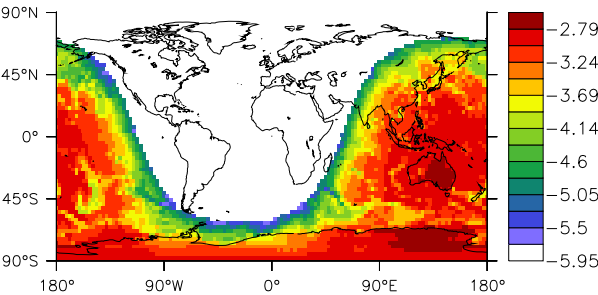

OLD:  $\lg(J(\text{BrNO}_3))$

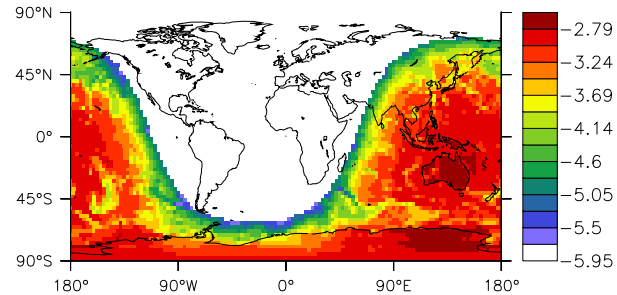

NEW:  $\lg(J(\text{BrNO}_3))$

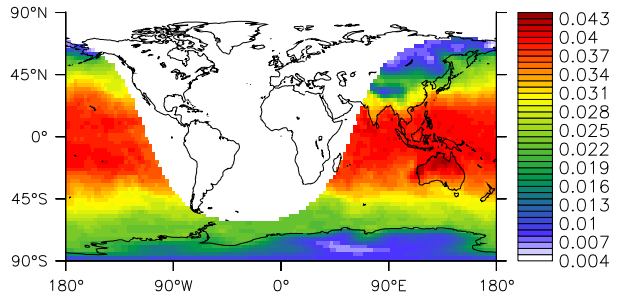

$\lg(\text{NEW}/\text{OLD})$

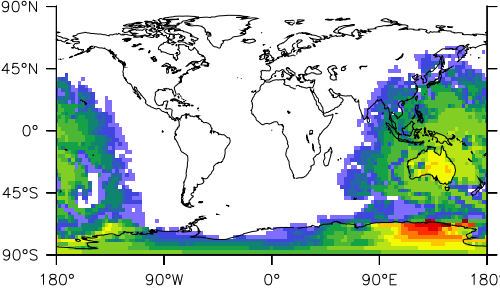

OLD:  $J(\text{BrNO}_2)$

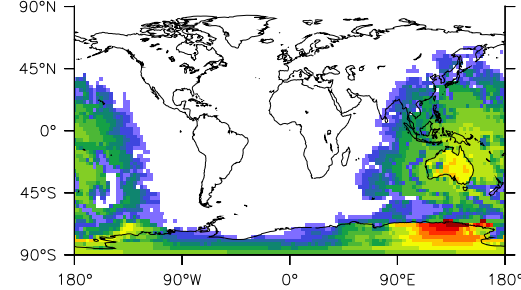

NEW:  $J(\text{BrNO}_2)$

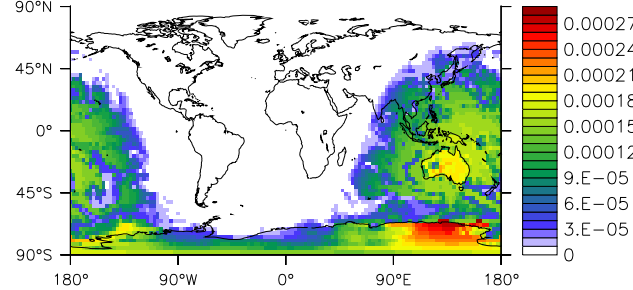

NEW-OLD

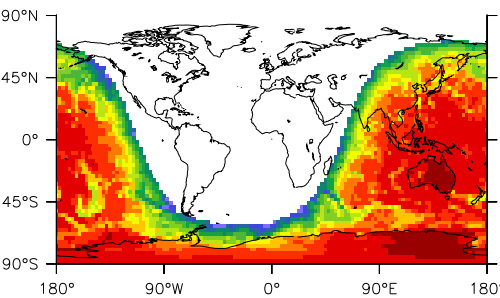

OLD:  $\lg(J(\text{BrNO}_2))$

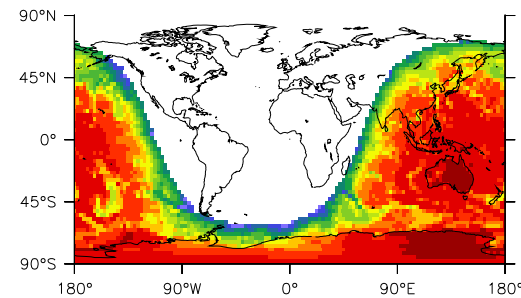

NEW:  $\lg(J(\text{BrNO}_2))$

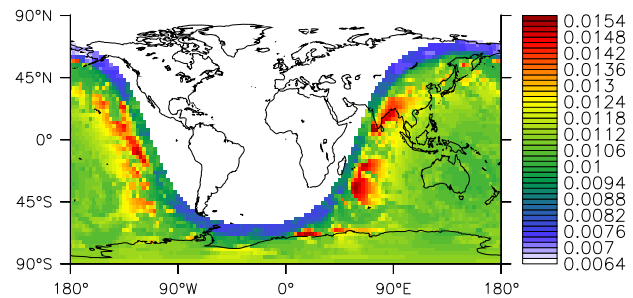

$\lg(\text{NEW}/\text{OLD})$

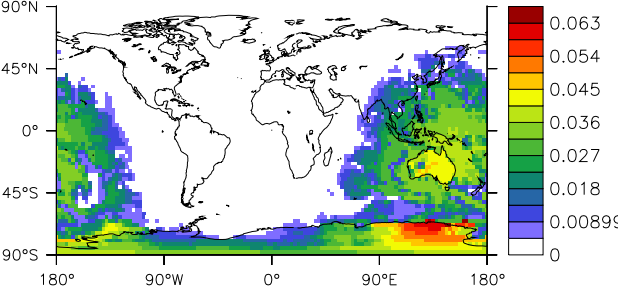

OLD:  $J(\text{Br}_2)$

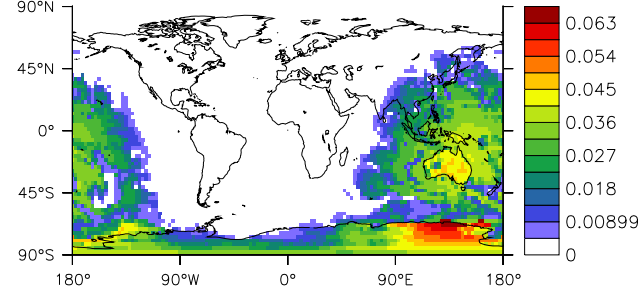

NEW:  $J(\text{Br}_2)$

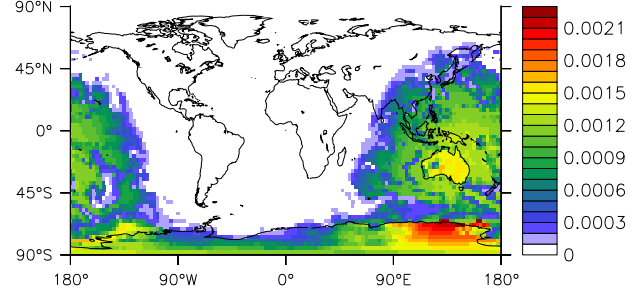

NEW - OLD

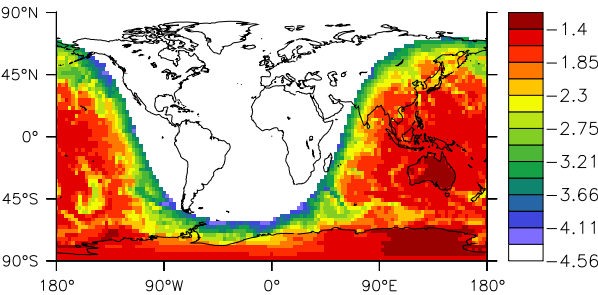

OLD:  $\lg(J(\text{Br}_2))$

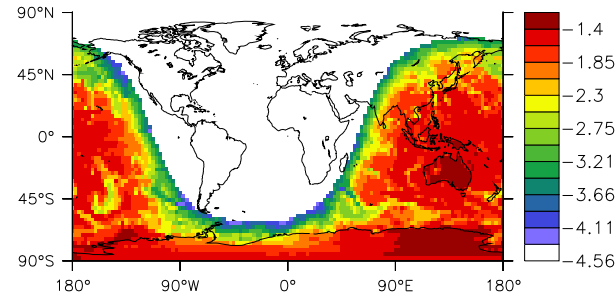

NEW:  $\lg(J(\text{Br}_2))$

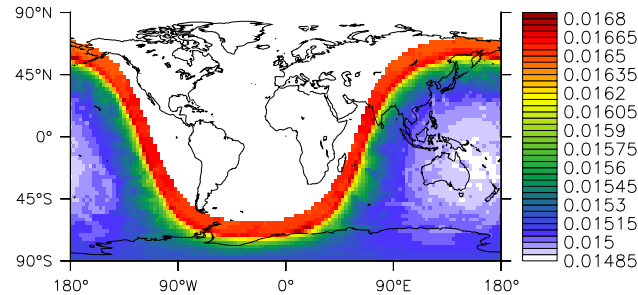

$\lg(\text{NEW}/\text{OLD})$

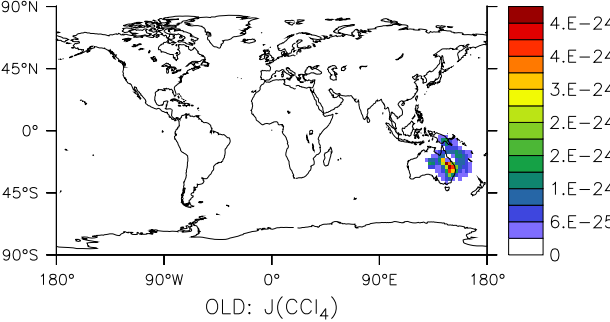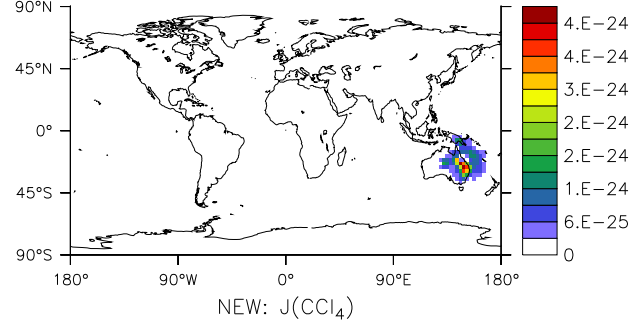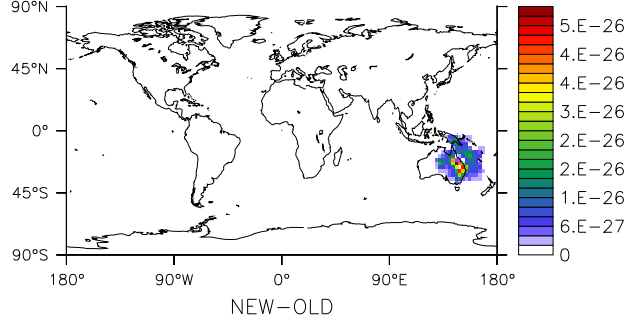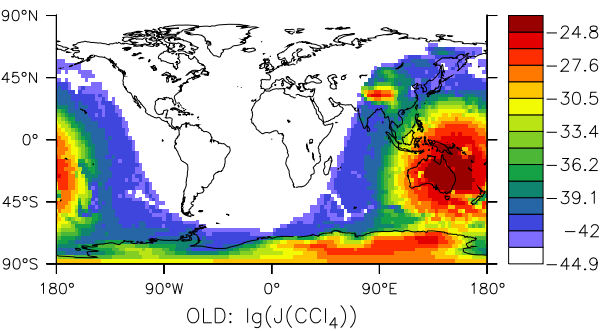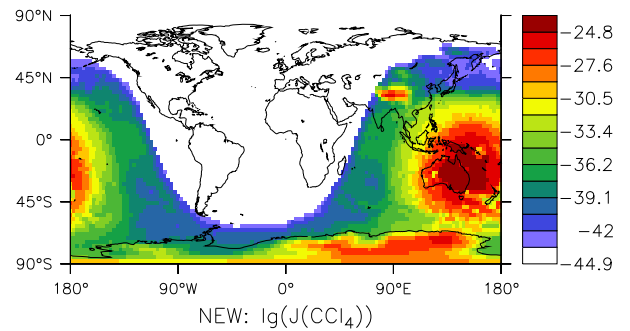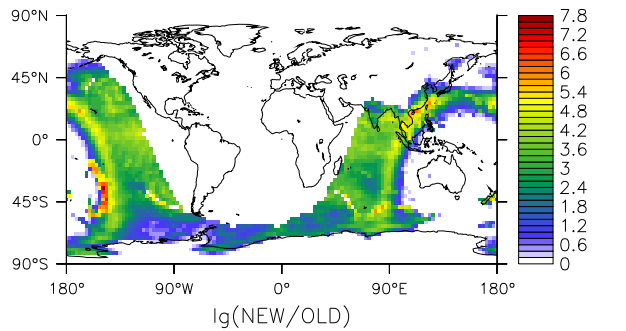

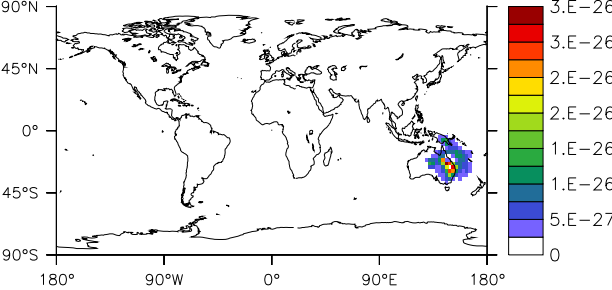

OLD:  $J(\text{CH}_3\text{Cl})$

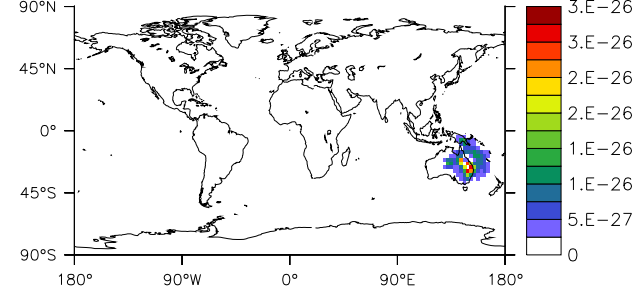

NEW:  $J(\text{CH}_3\text{Cl})$

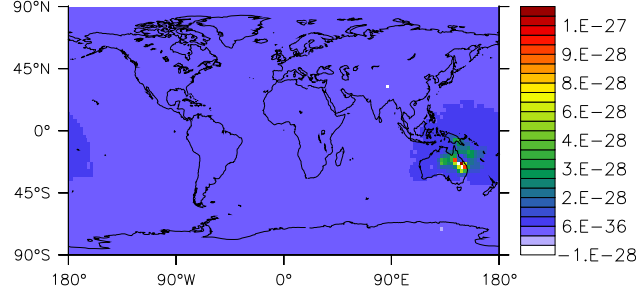

NEW-OLD

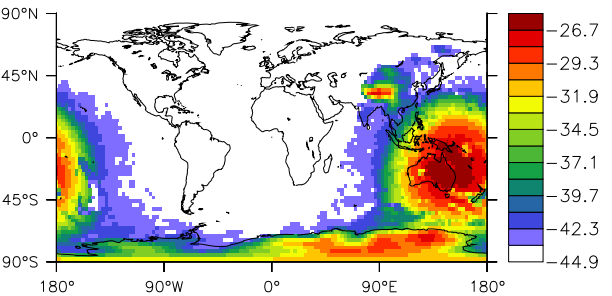

OLD:  $\lg(J(\text{CH}_3\text{Cl}))$

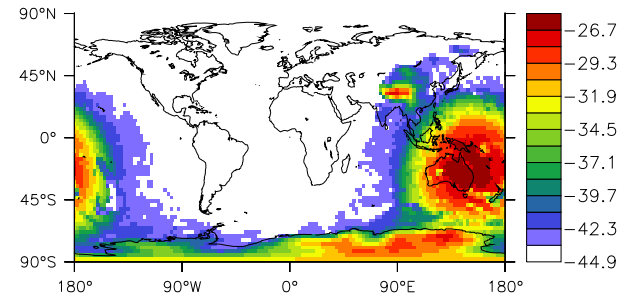

NEW:  $\lg(J(\text{CH}_3\text{Cl}))$

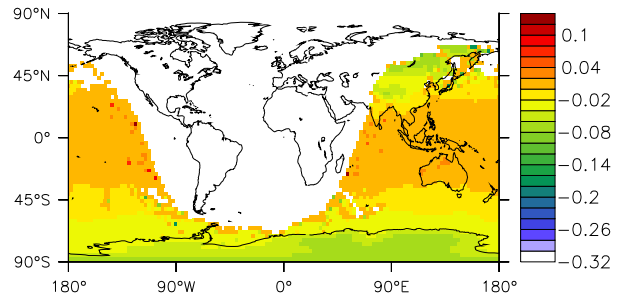

$\lg(\text{NEW}/\text{OLD})$

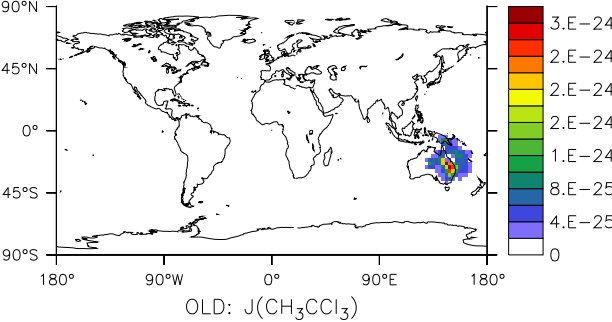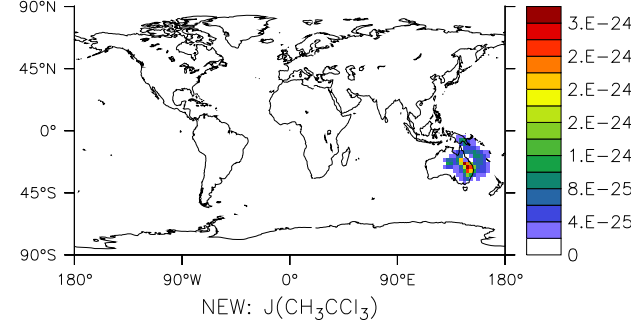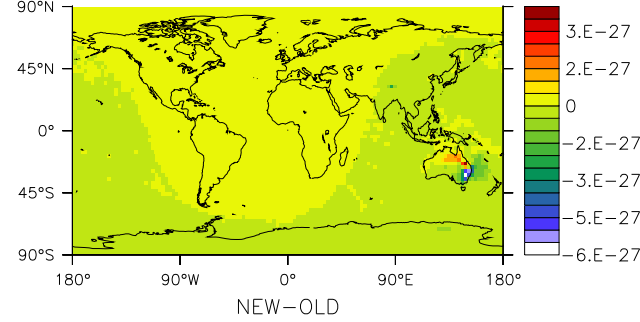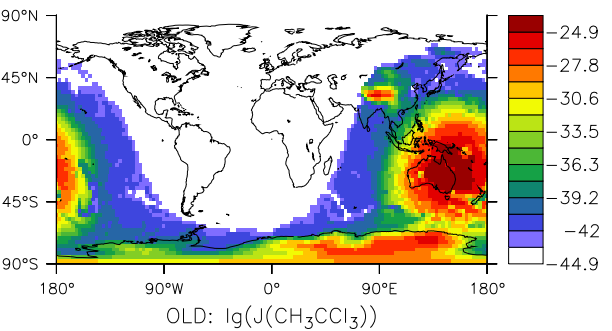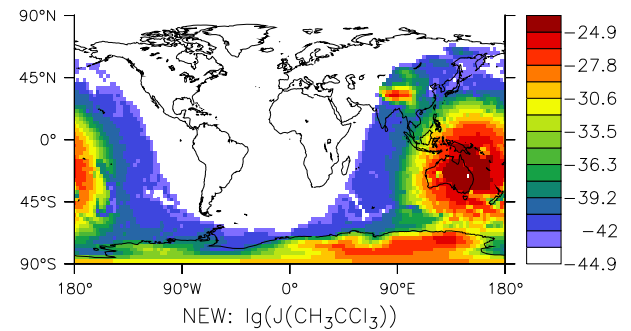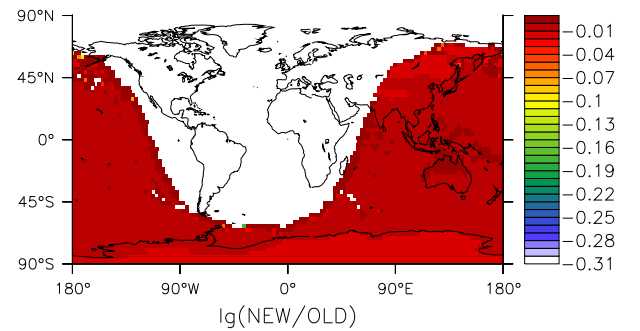

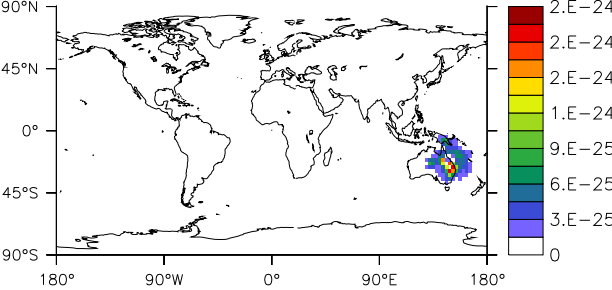

OLD:  $J(\text{CFC}_{13})$

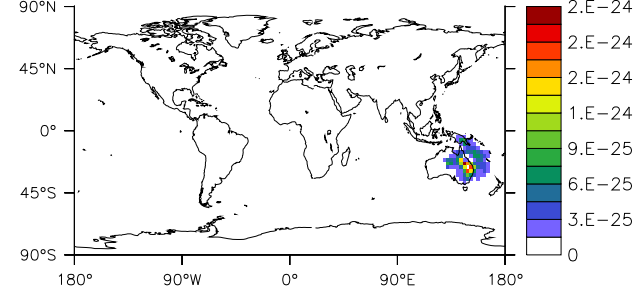

NEW:  $J(\text{CFC}_{13})$

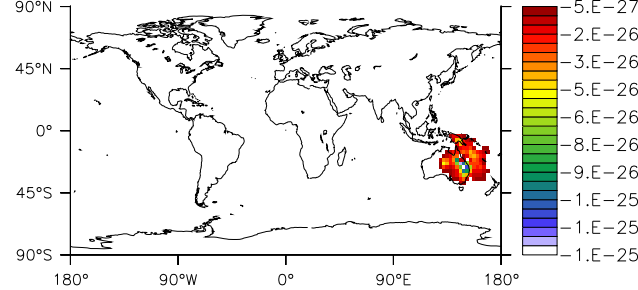

NEW-OLD

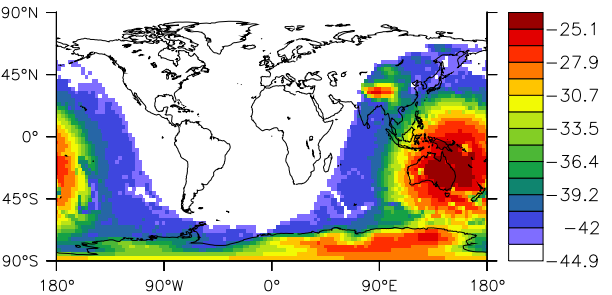

OLD:  $\lg(J(\text{CFC}_{13}))$

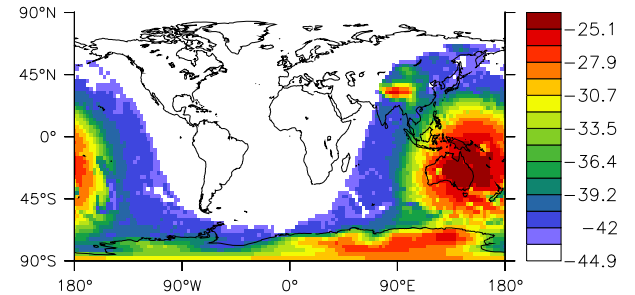

NEW:  $\lg(J(\text{CFC}_{13}))$

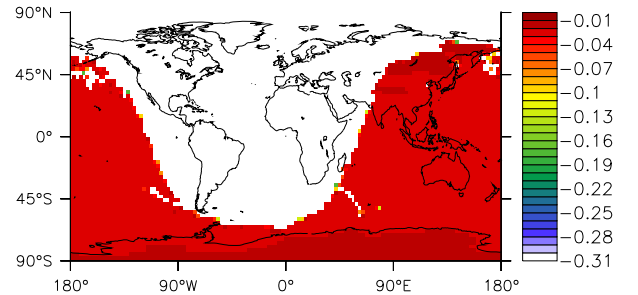

$\lg(\text{NEW}/\text{OLD})$

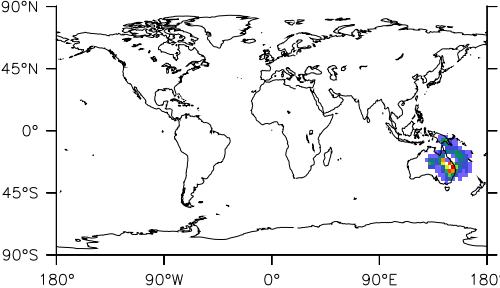

OLD:  $J(\text{CF}_2\text{Cl}_2)$

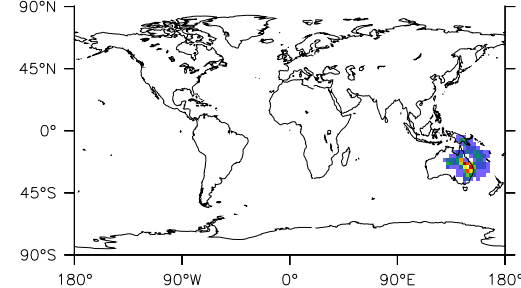

NEW:  $J(\text{CF}_2\text{Cl}_2)$

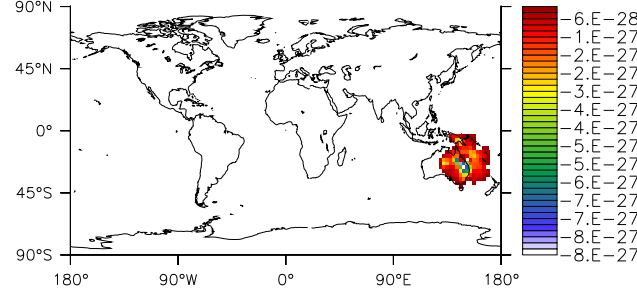

NEW-OLD

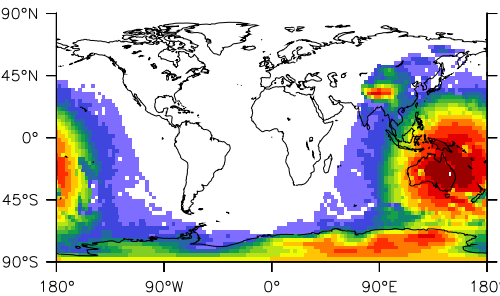

OLD:  $\lg(J(\text{CF}_2\text{Cl}_2))$

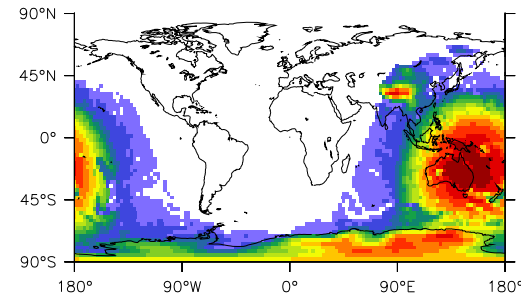

NEW:  $\lg(J(\text{CF}_2\text{Cl}_2))$

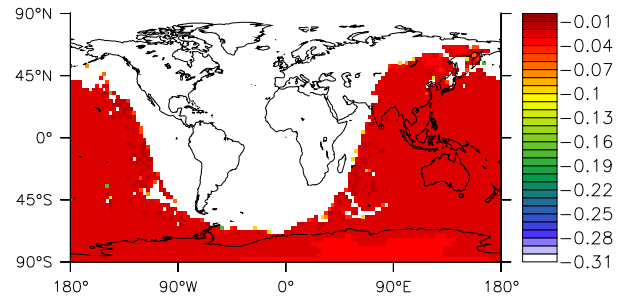

$\lg(\text{NEW}/\text{OLD})$



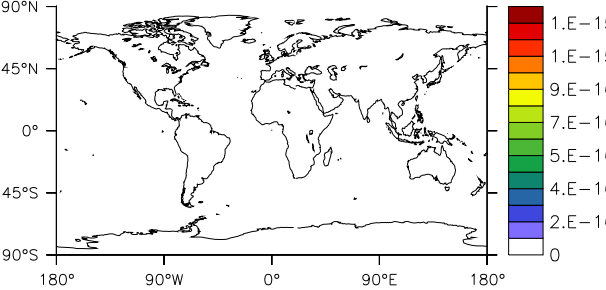

OLD:  $J(\text{CH}_3\text{Br})$

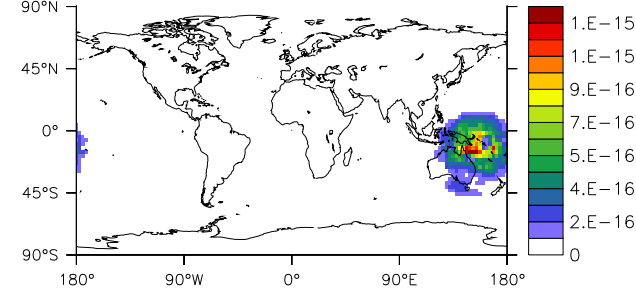

NEW:  $J(\text{CH}_3\text{Br})$

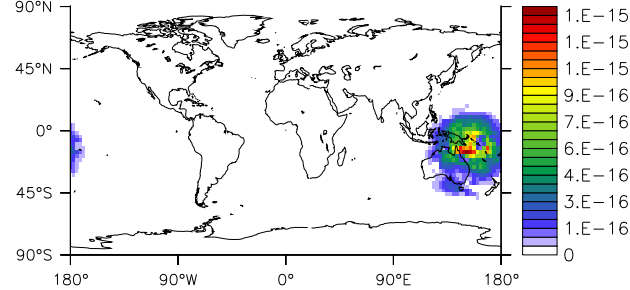

NEW-OLD

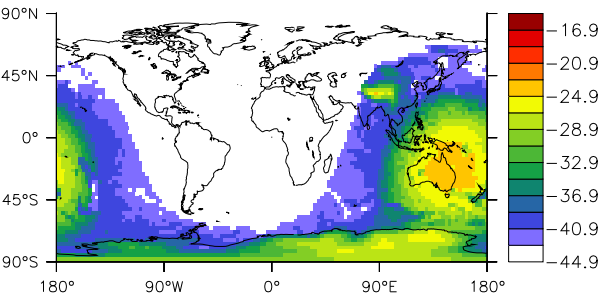

OLD:  $\lg(J(\text{CH}_3\text{Br}))$

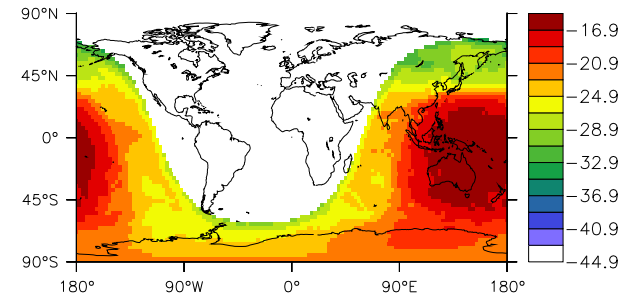

NEW:  $\lg(J(\text{CH}_3\text{Br}))$

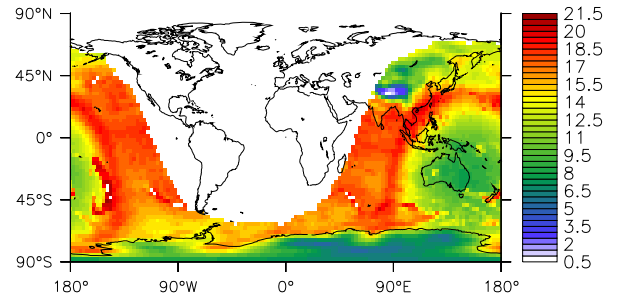

$\lg(\text{NEW}/\text{OLD})$

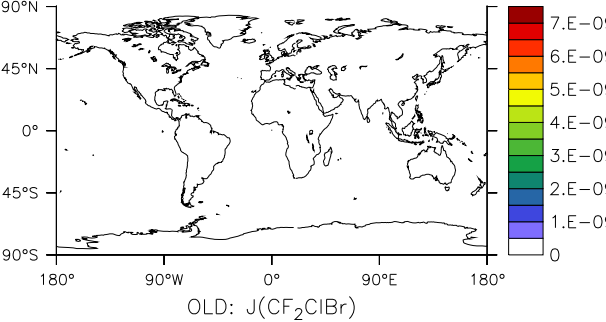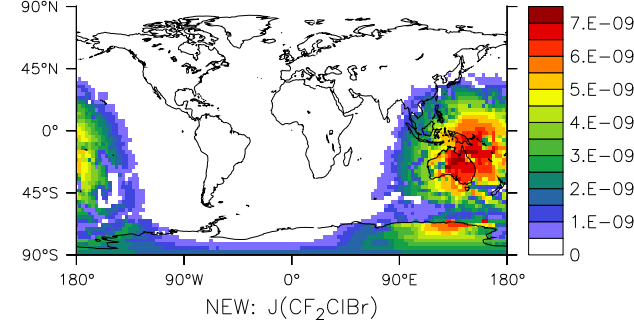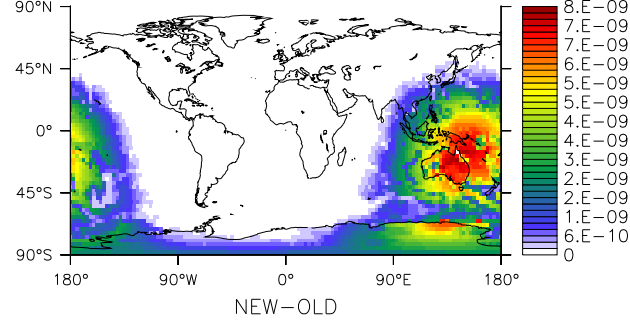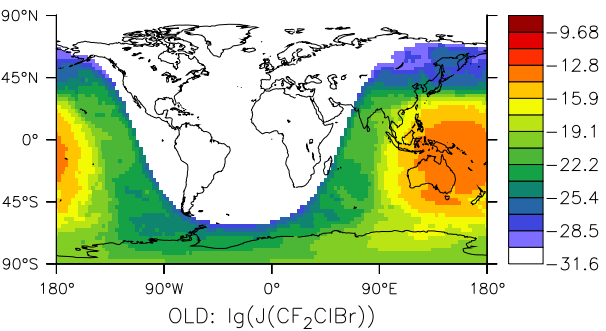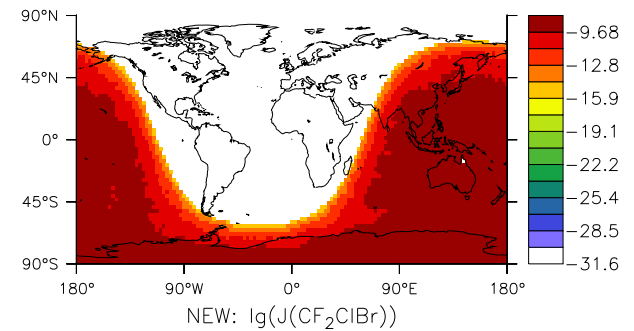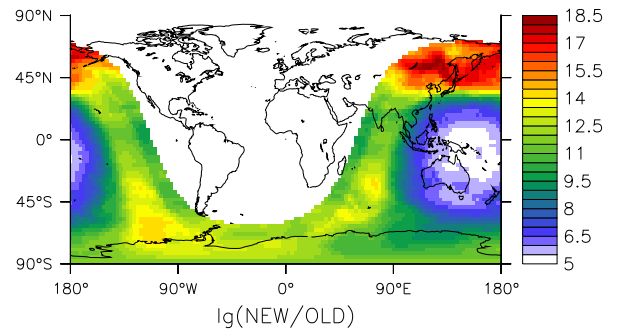

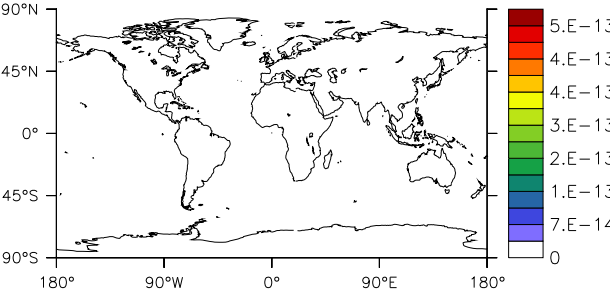

OLD:  $J(\text{CF}_3\text{Br})$

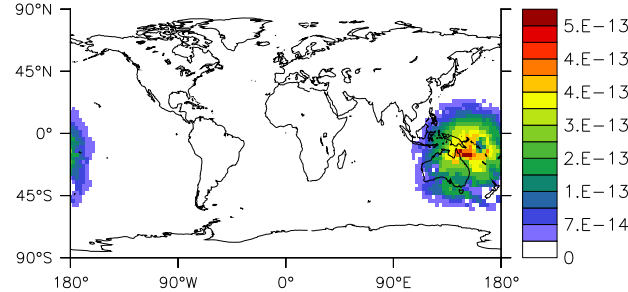

NEW:  $J(\text{CF}_3\text{Br})$

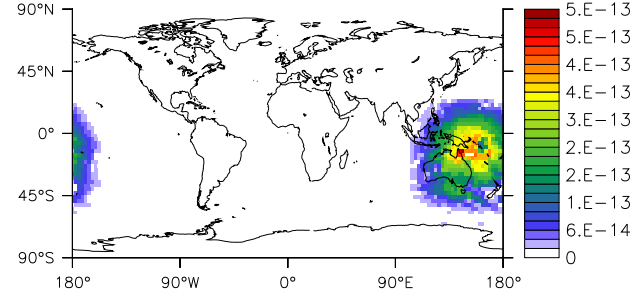

NEW-OLD

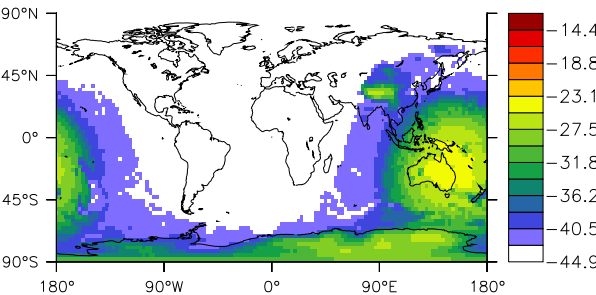

OLD:  $\lg(J(\text{CF}_3\text{Br}))$

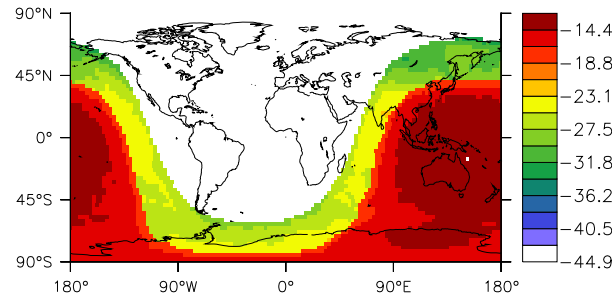

NEW:  $\lg(J(\text{CF}_3\text{Br}))$

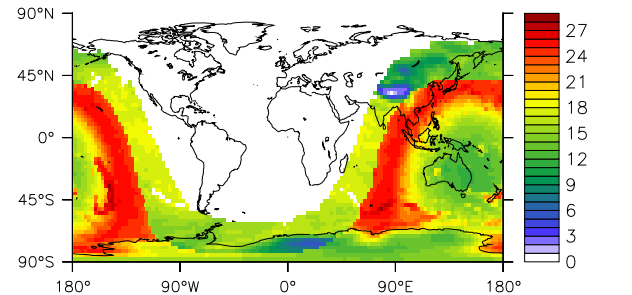

$\lg(\text{NEW}/\text{OLD})$

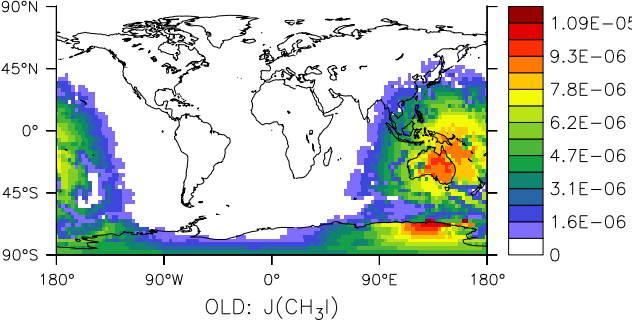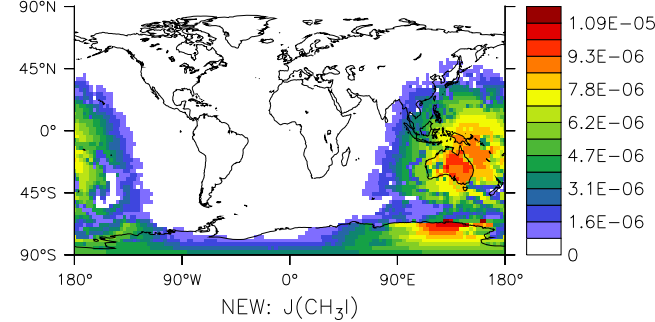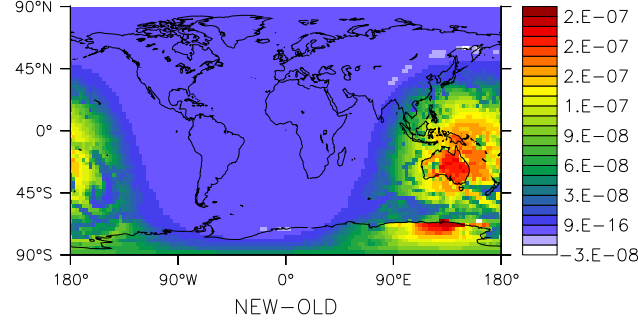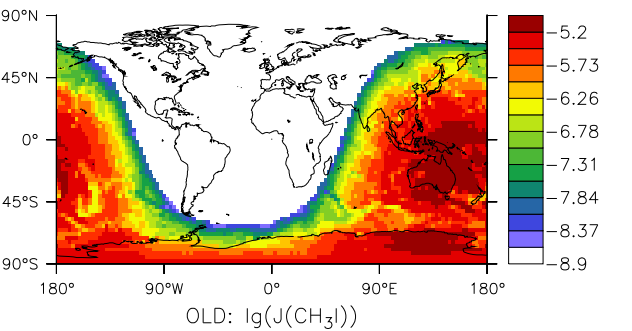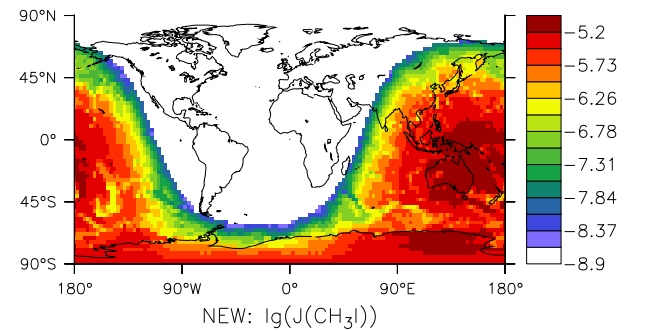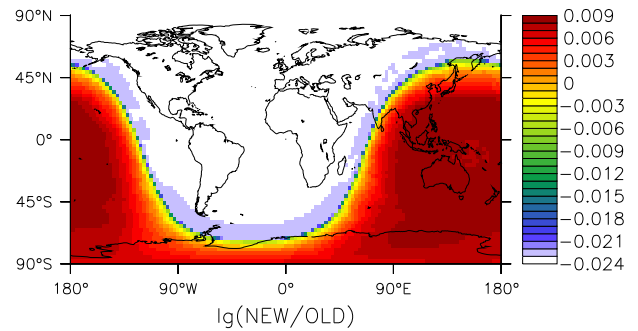

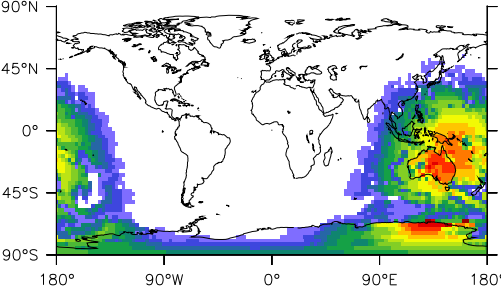

OLD:  $J(\text{C}_3\text{H}_7\text{I})$

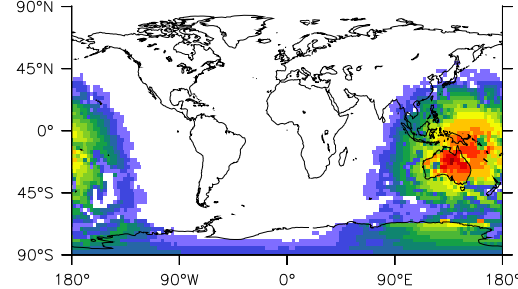

NEW:  $J(\text{C}_3\text{H}_7\text{I})$

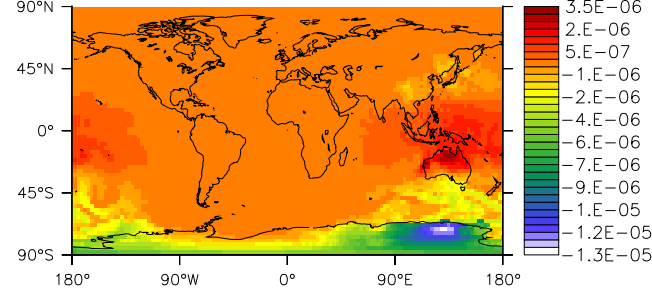

NEW-OLD

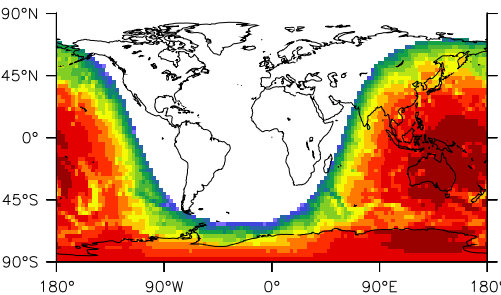

OLD:  $\lg(J(\text{C}_3\text{H}_7\text{I}))$

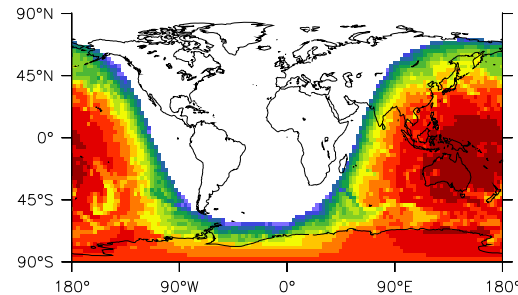

NEW:  $\lg(J(\text{C}_3\text{H}_7\text{I}))$

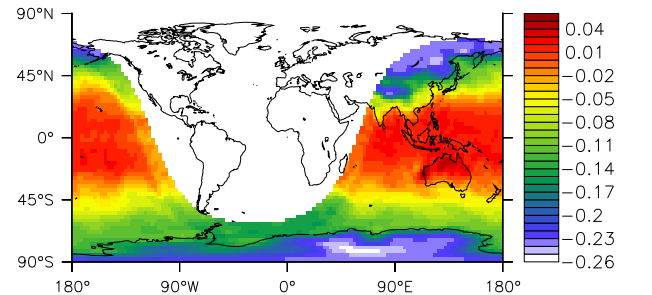

$\lg(\text{NEW}/\text{OLD})$

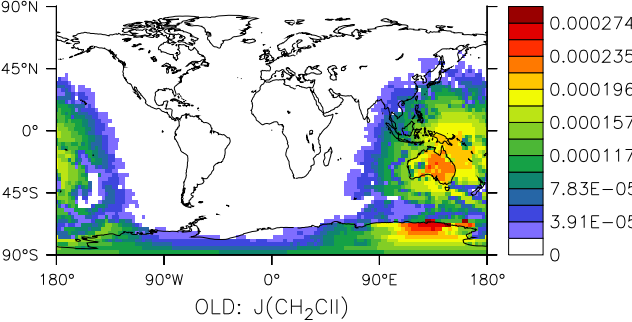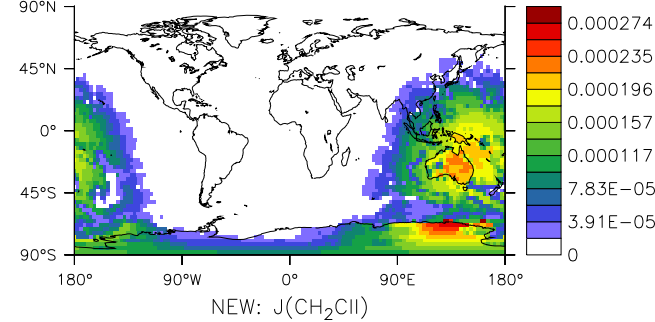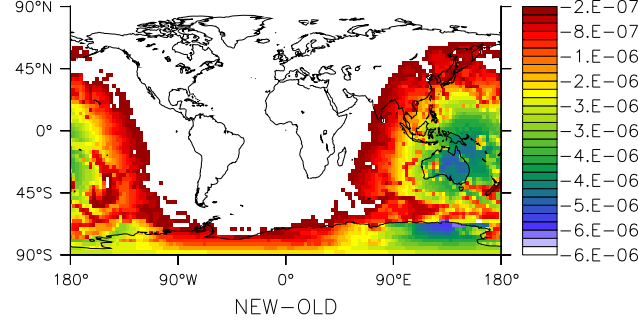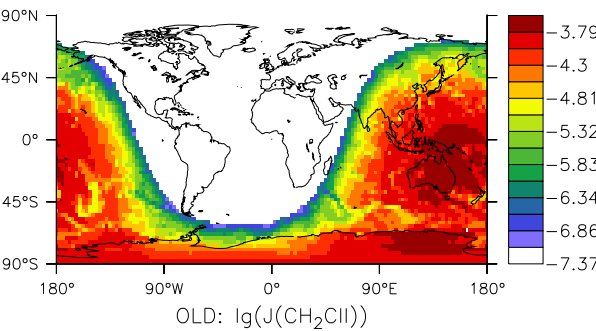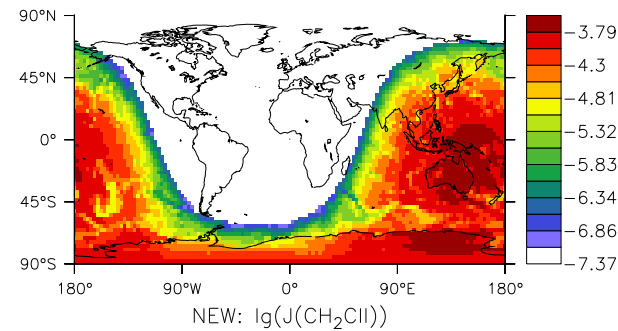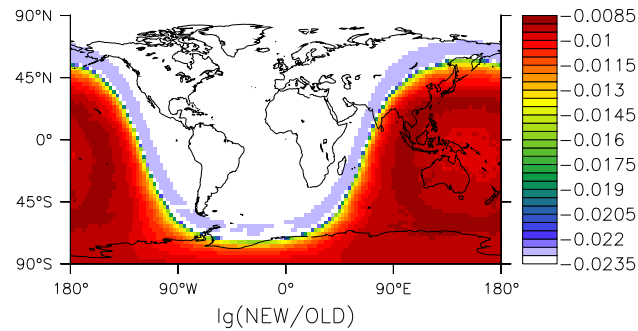

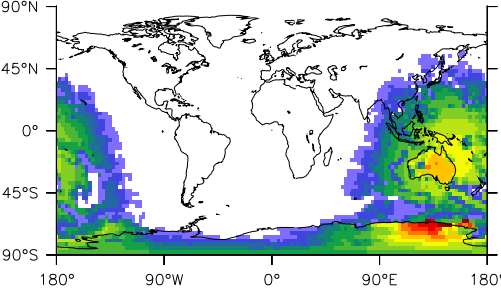

OLD:  $J(\text{CH}_2\text{I}_2)$

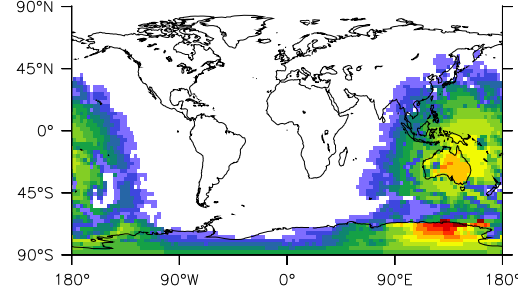

NEW:  $J(\text{CH}_2\text{I}_2)$

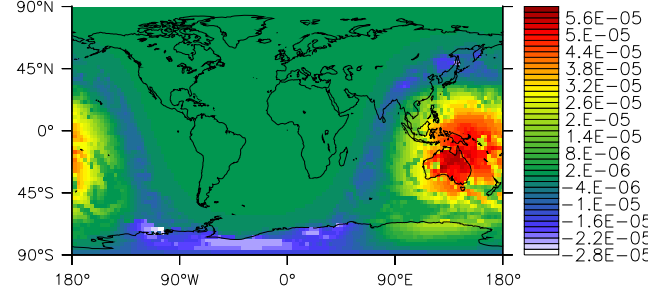

NEW-OLD

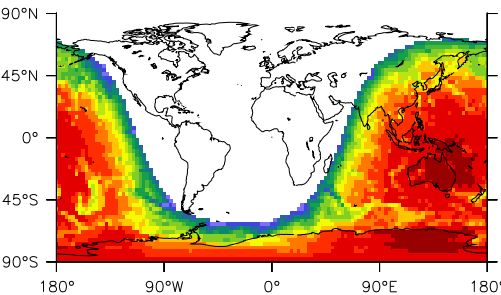

OLD:  $\lg(J(\text{CH}_2\text{I}_2))$

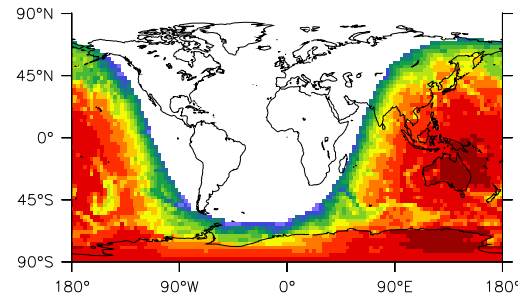

NEW:  $\lg(J(\text{CH}_2\text{I}_2))$

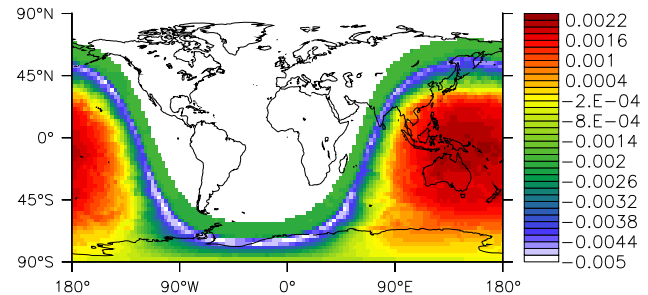

$\lg(\text{NEW}/\text{OLD})$

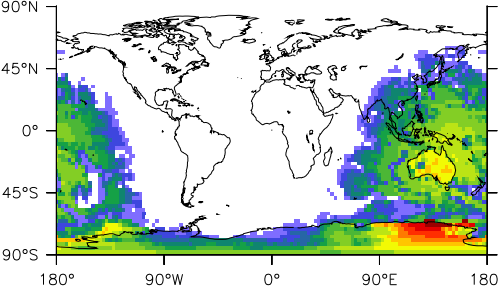

OLD:  $J(IO)$

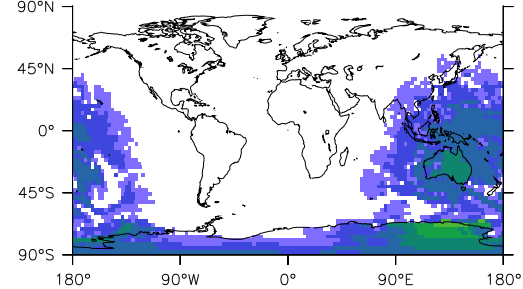

NEW:  $J(IO)$

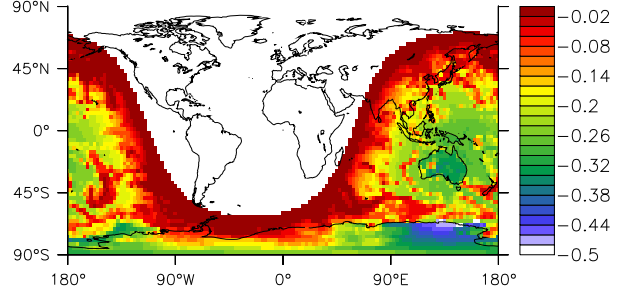

NEW-OLD

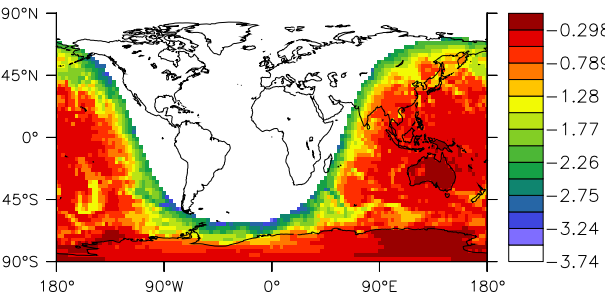

OLD:  $\lg(J(IO))$

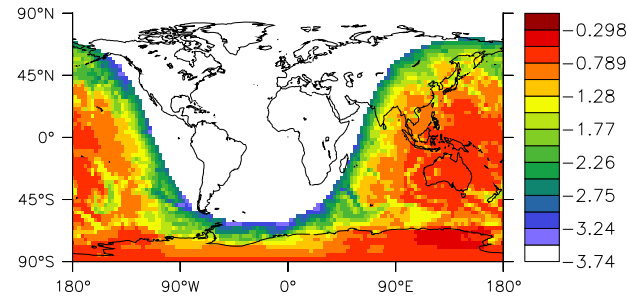

NEW:  $\lg(J(IO))$

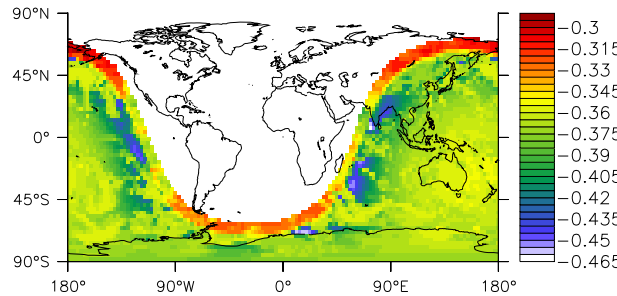

$\lg(NEW/OLD)$



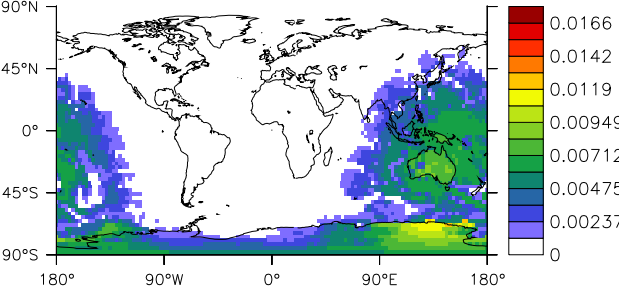

OLD:  $J(HOI)$

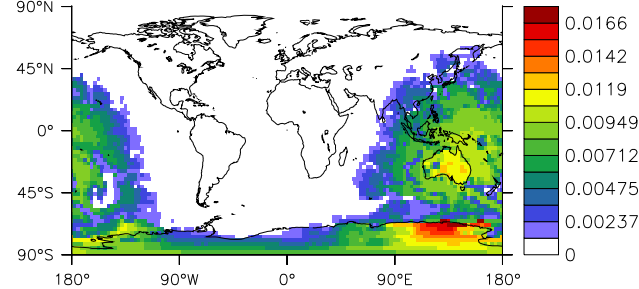

NEW:  $J(HOI)$

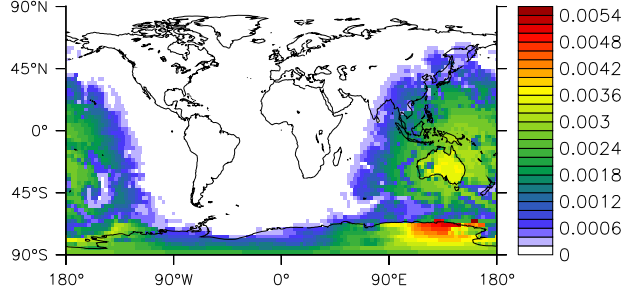

NEW-OLD

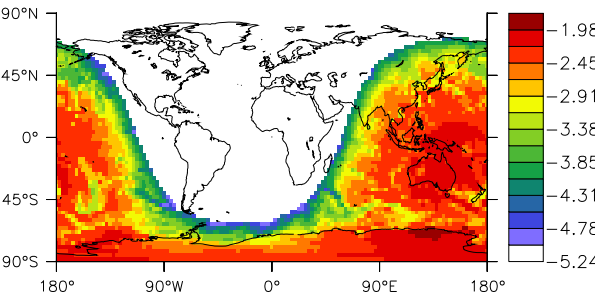

OLD:  $\lg(J(HOI))$

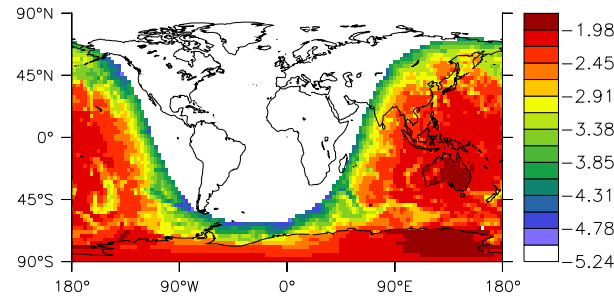

NEW:  $\lg(J(HOI))$

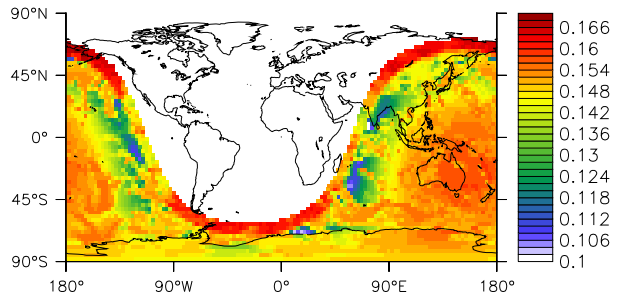

$\lg(NEW/OLD)$

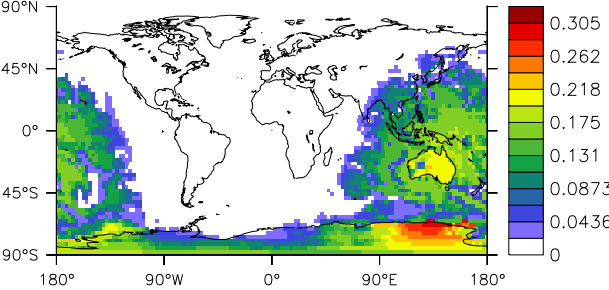

OLD:  $J(I_2)$

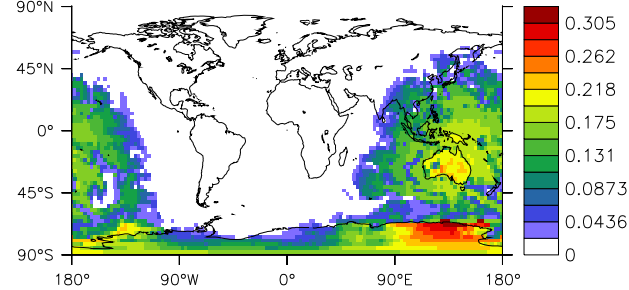

NEW:  $J(I_2)$

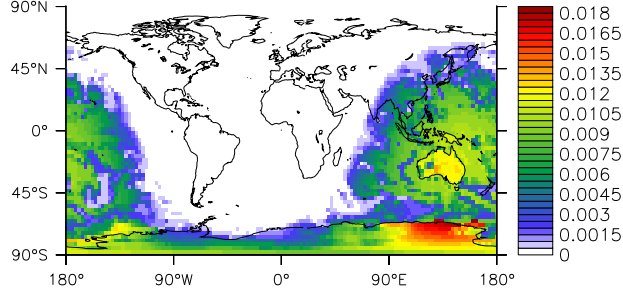

NEW-OLD

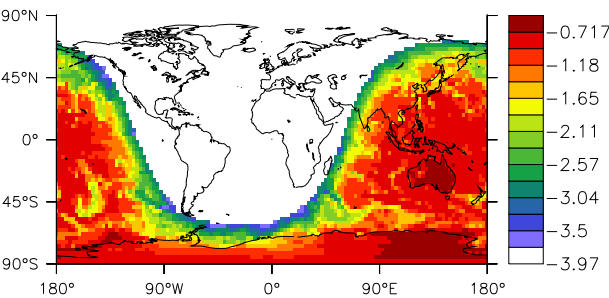

OLD:  $\lg(J(I_2))$

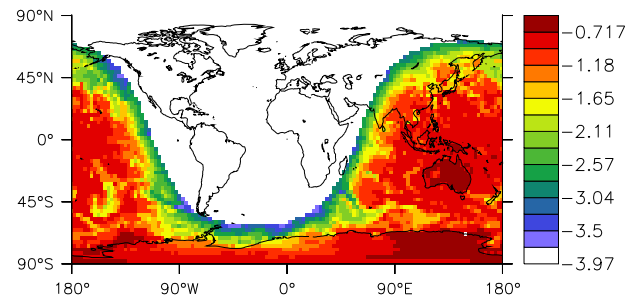

NEW:  $\lg(J(I_2))$

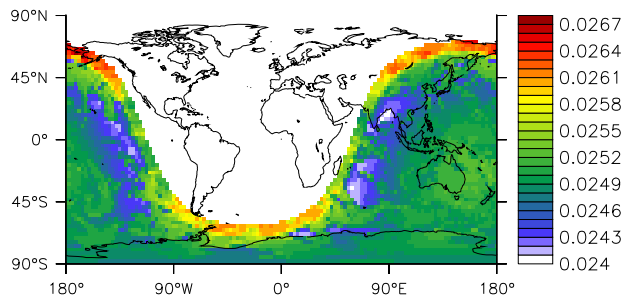

$\lg(\text{NEW}/\text{OLD})$

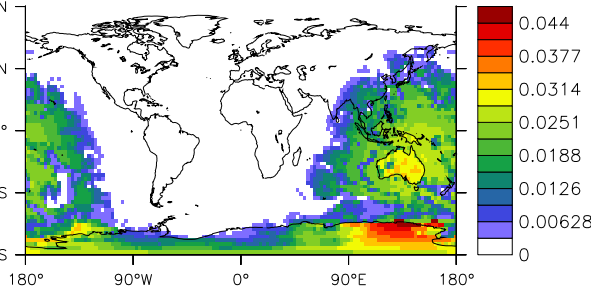

OLD:  $J(ICI)$

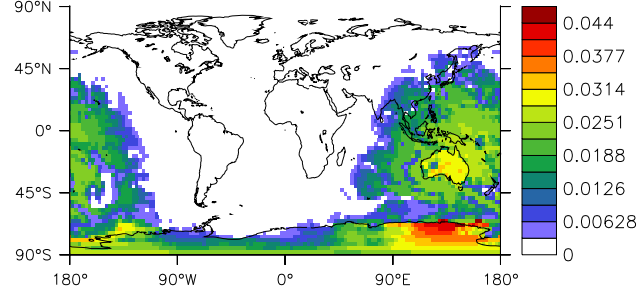

NEW:  $J(ICI)$

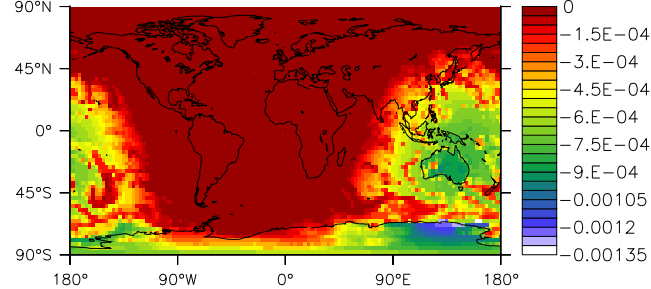

NEW-OLD

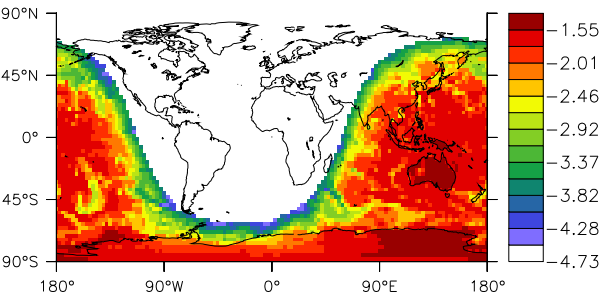

OLD:  $\lg(J(ICI))$

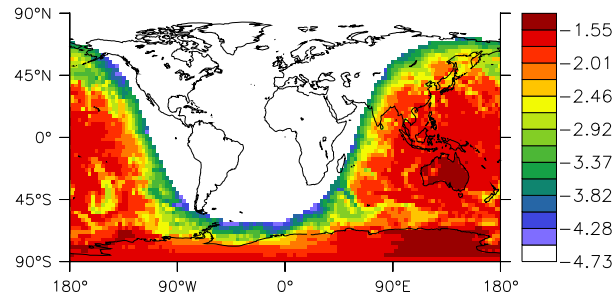

NEW:  $\lg(J(ICI))$

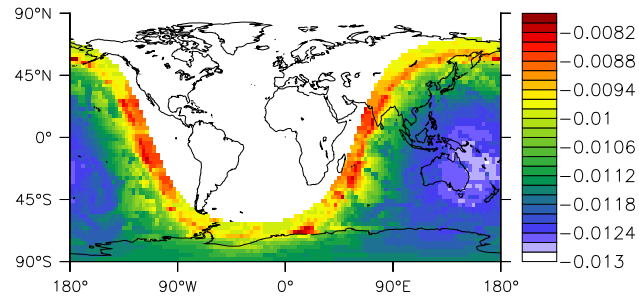

$\lg(\text{NEW}/\text{OLD})$

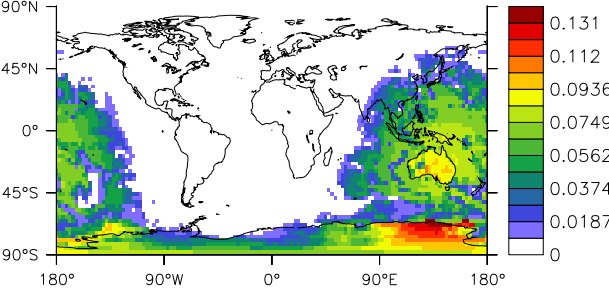

OLD: J(IBr)

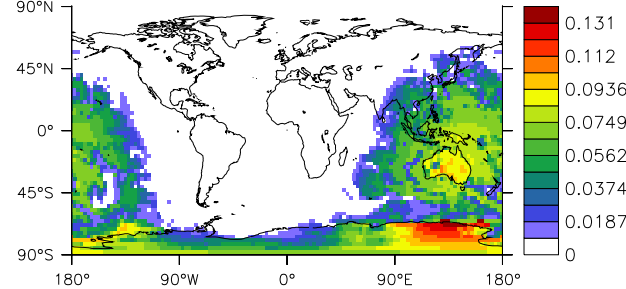

NEW: J(IBr)

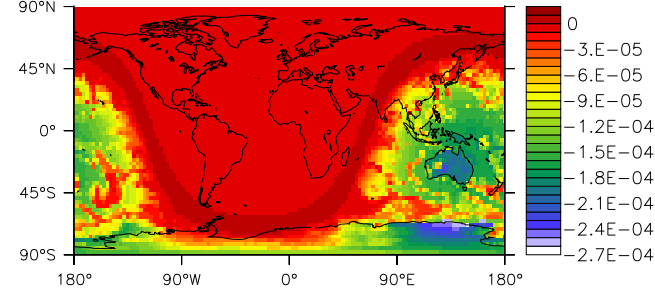

NEW-OLD

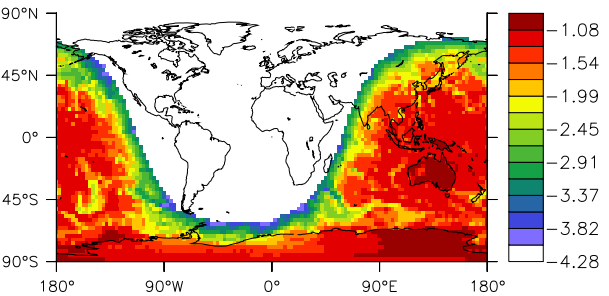

OLD: lg(J(IBr))

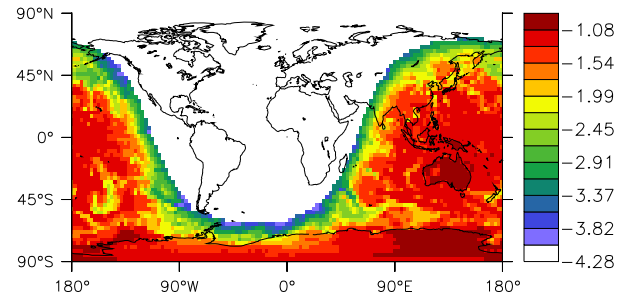

NEW: lg(J(IBr))

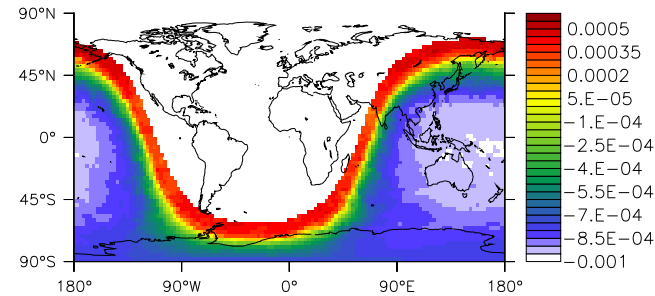

lg(NEW/OLD)

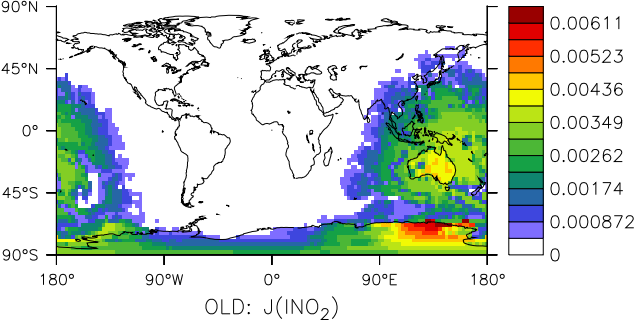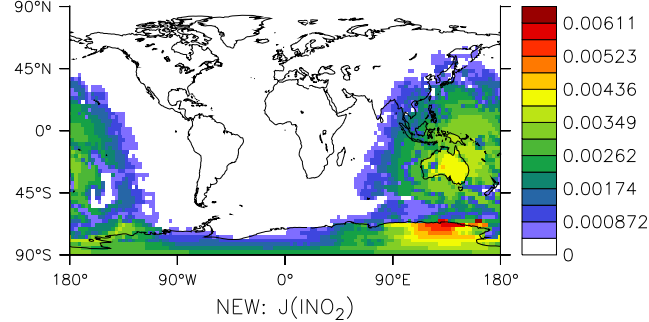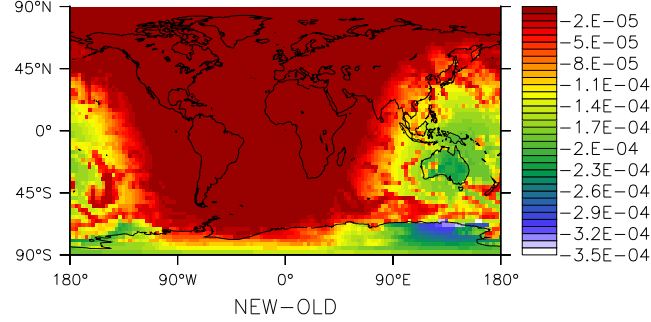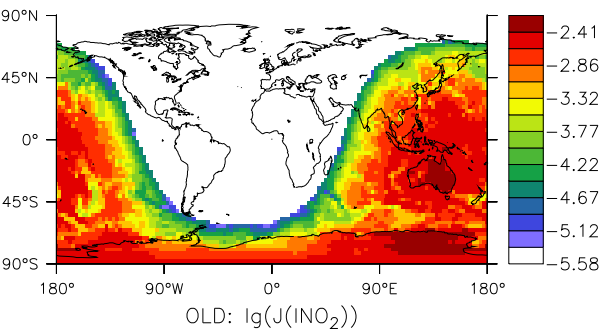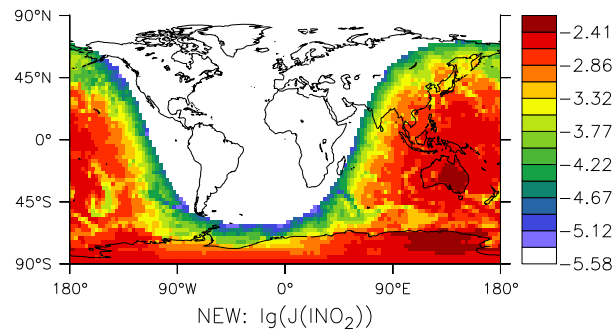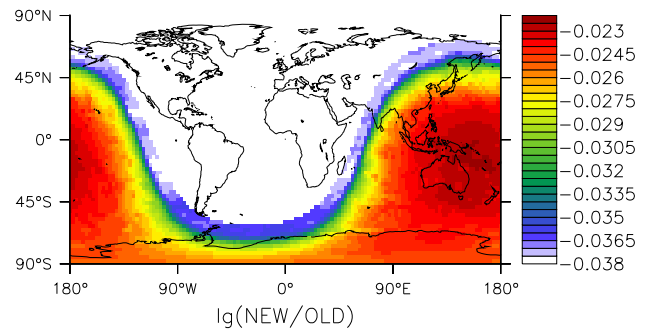

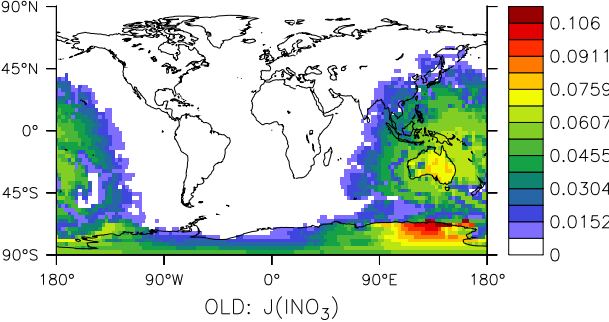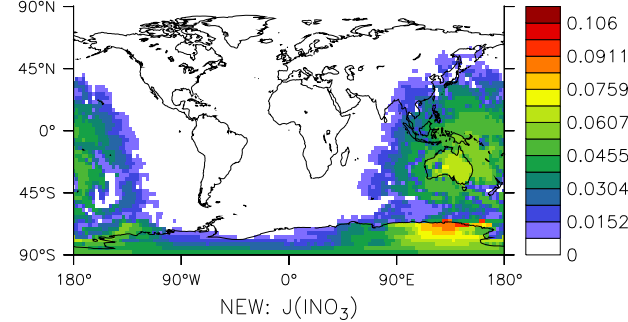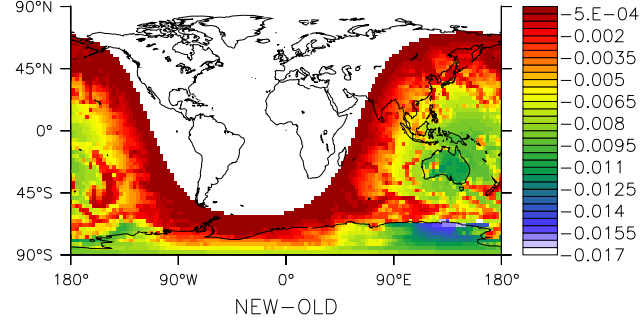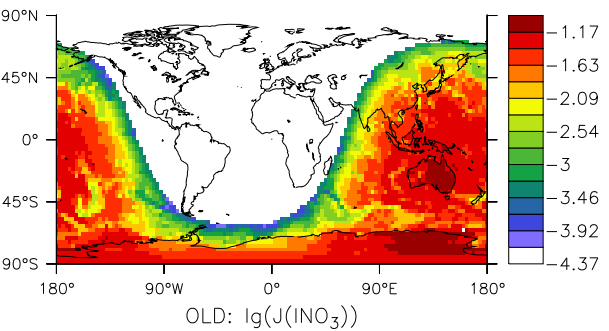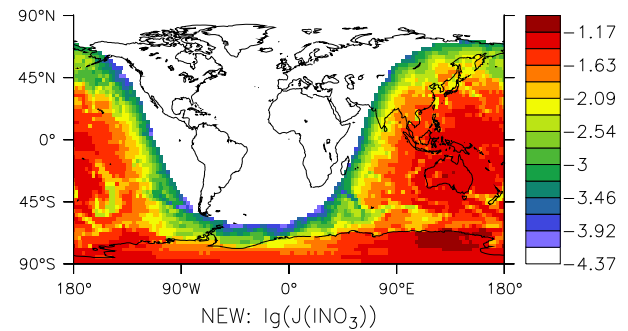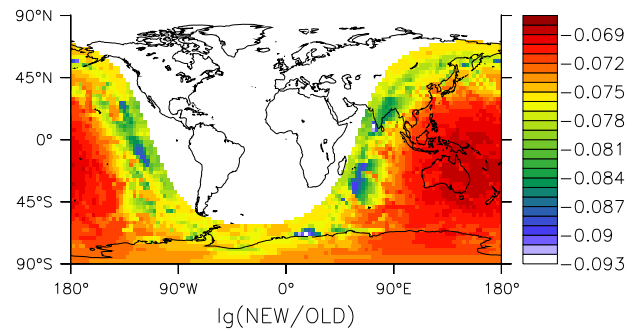

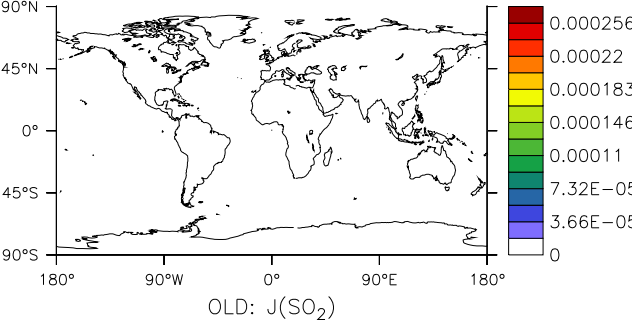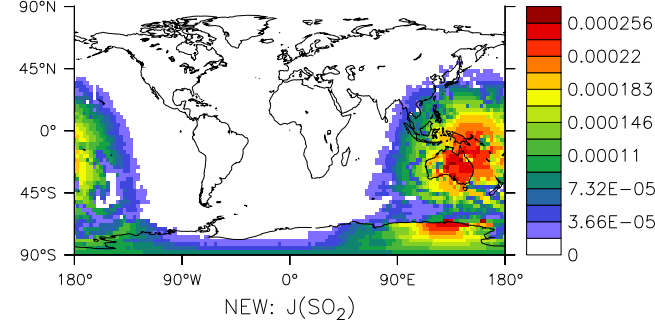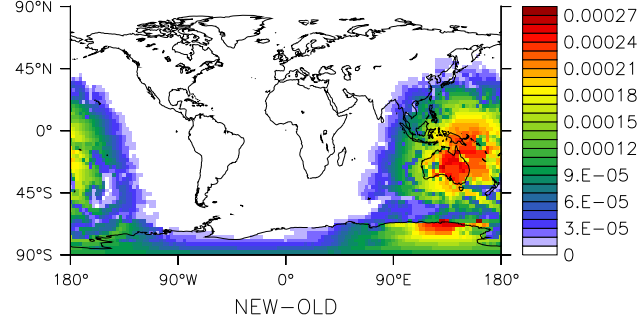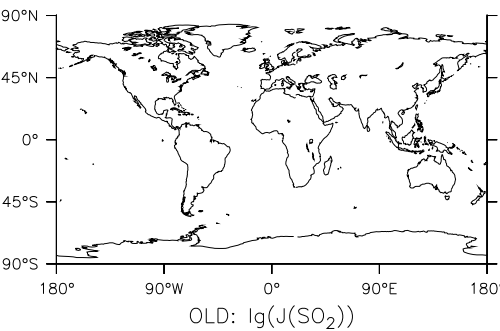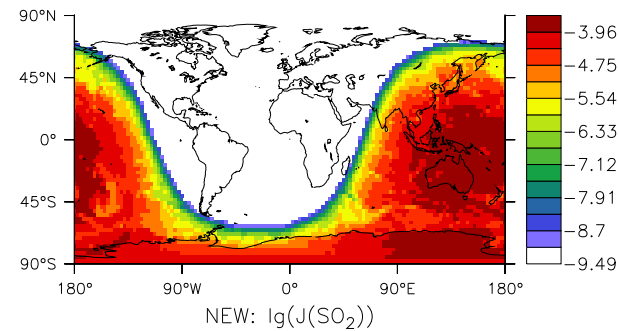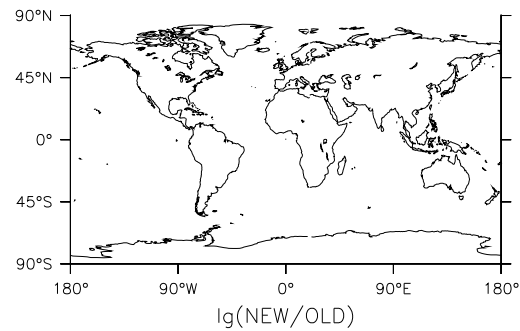

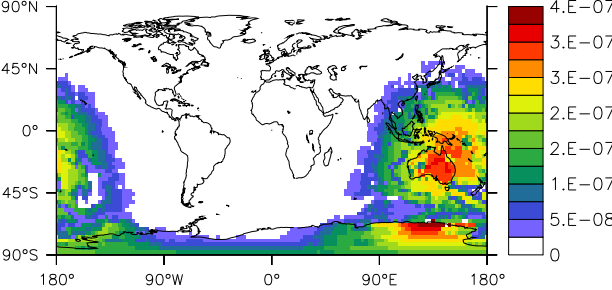

OLD:  $J(\text{SO}_3)$

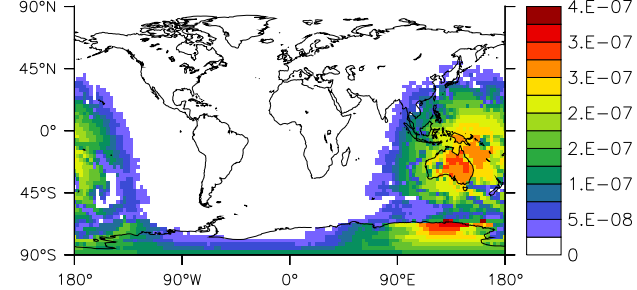

NEW:  $J(\text{SO}_3)$

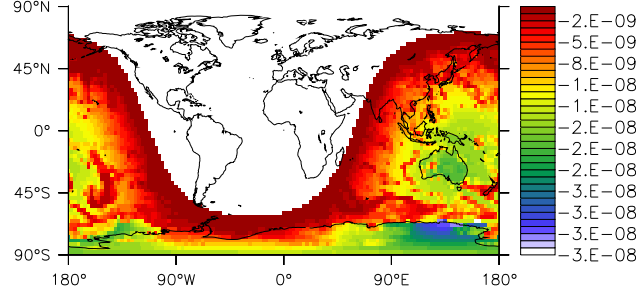

NEW-OLD

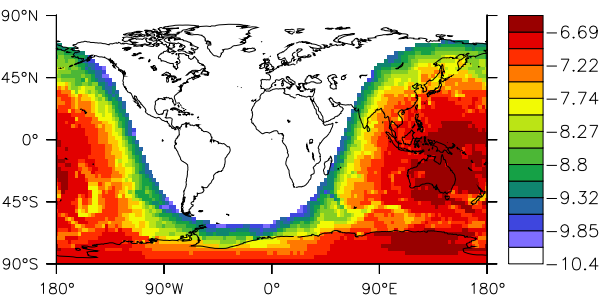

OLD:  $\lg(J(\text{SO}_3))$

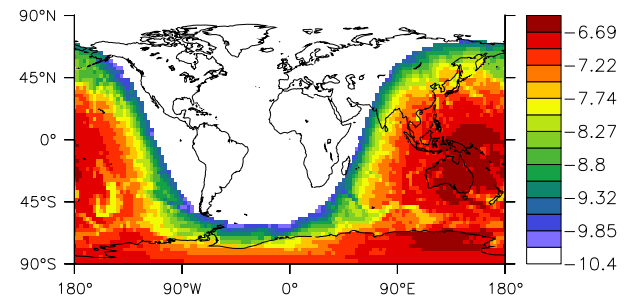

NEW:  $\lg(J(\text{SO}_3))$

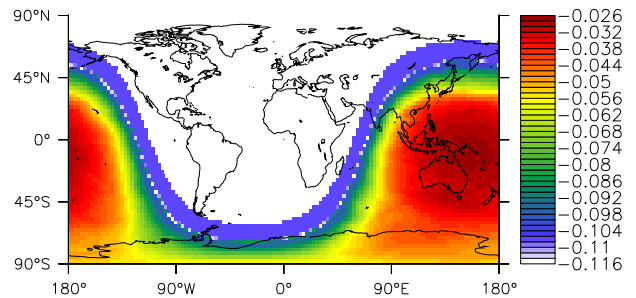

$\lg(\text{NEW}/\text{OLD})$



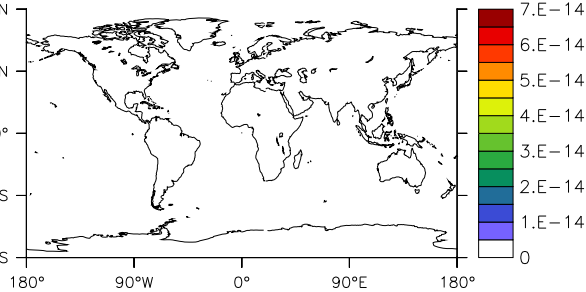

OLD: J(OCS)

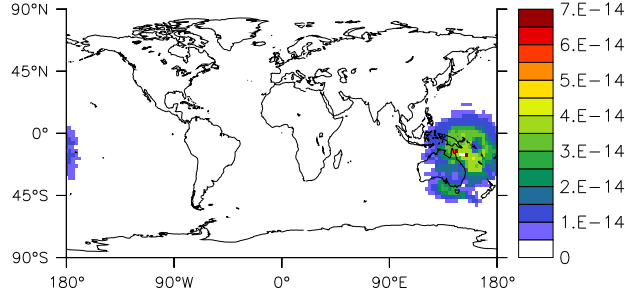

NEW: J(OCS)

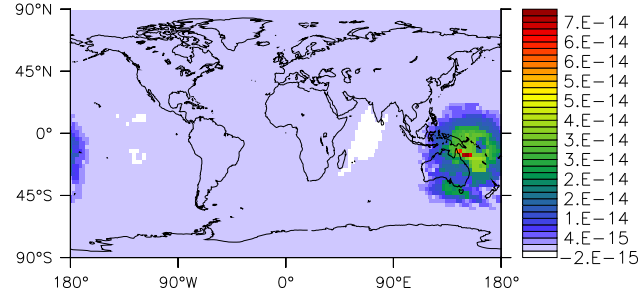

NEW-OLD

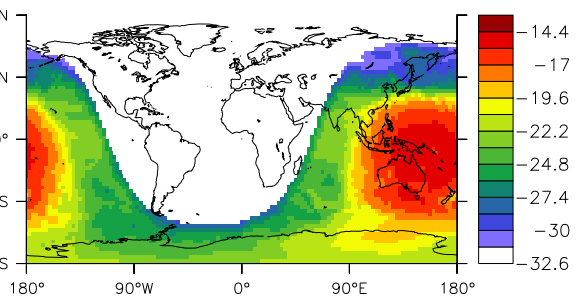

OLD:  $\lg(J(OCS))$

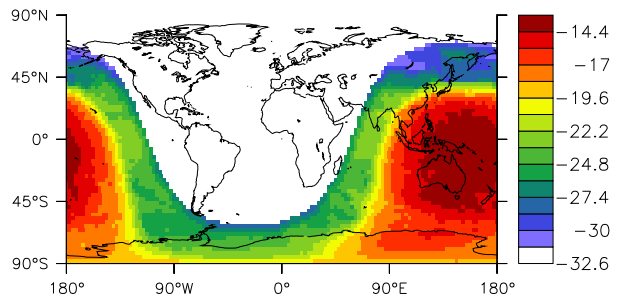

NEW:  $\lg(J(OCS))$

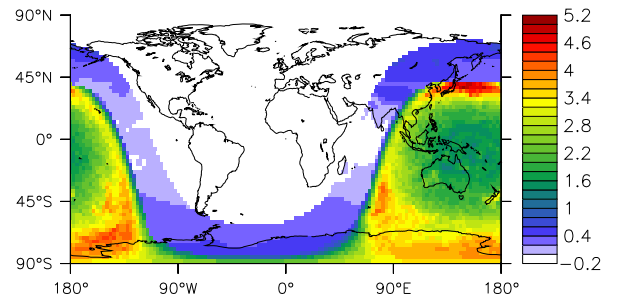

$\lg(NEW/OLD)$

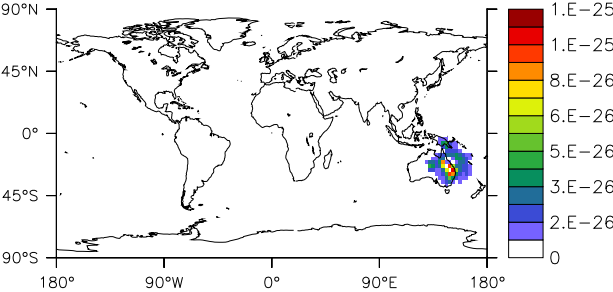

OLD:  $J(\text{N}_2\text{O})$

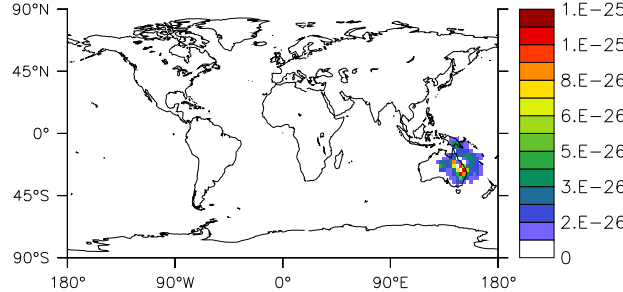

NEW:  $J(\text{N}_2\text{O})$

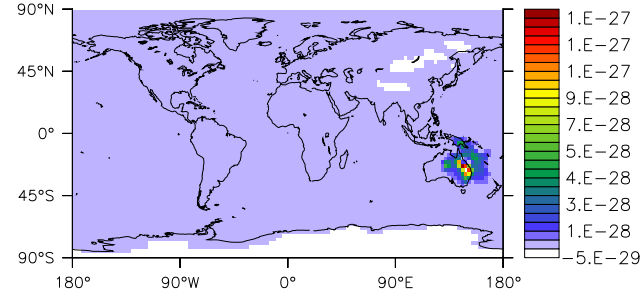

NEW-OLD

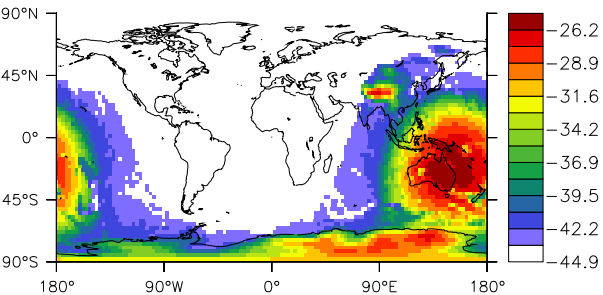

OLD:  $\lg(J(\text{N}_2\text{O}))$

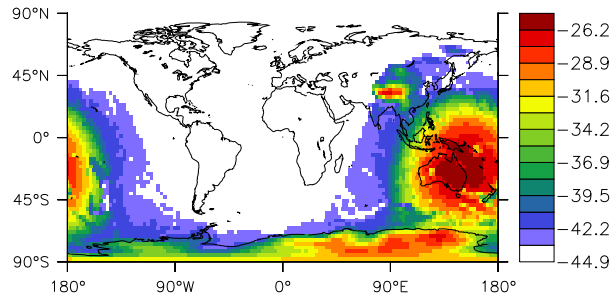

NEW:  $\lg(J(\text{N}_2\text{O}))$

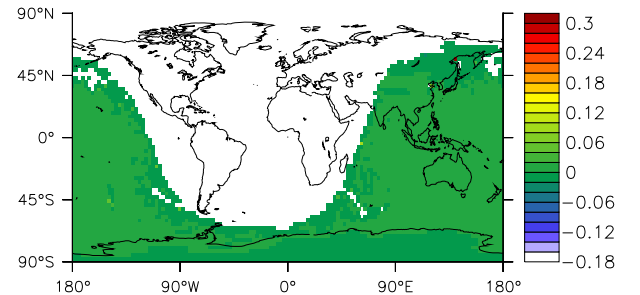

$\lg(\text{NEW}/\text{OLD})$

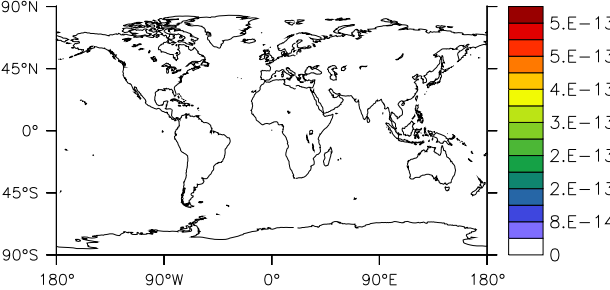

OLD:  $J(\text{CO}_2)$

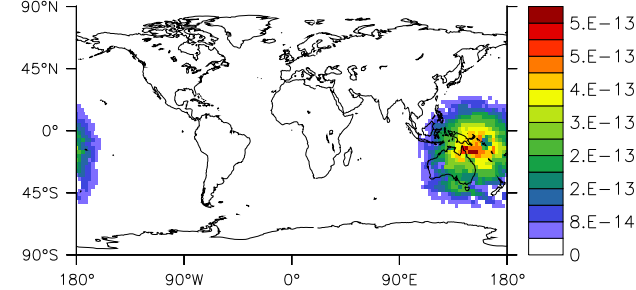

NEW:  $J(\text{CO}_2)$

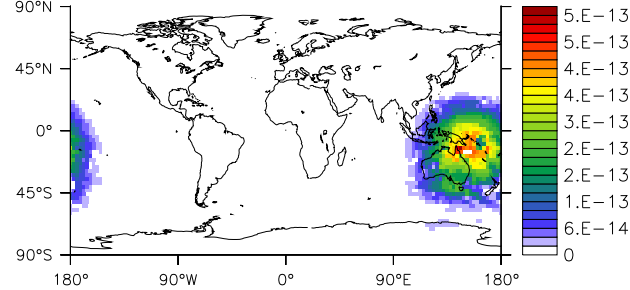

NEW-OLD

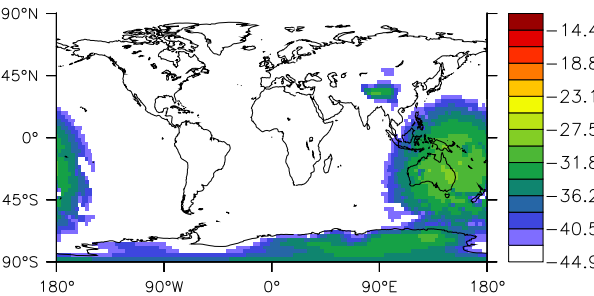

OLD:  $\lg(J(\text{CO}_2))$

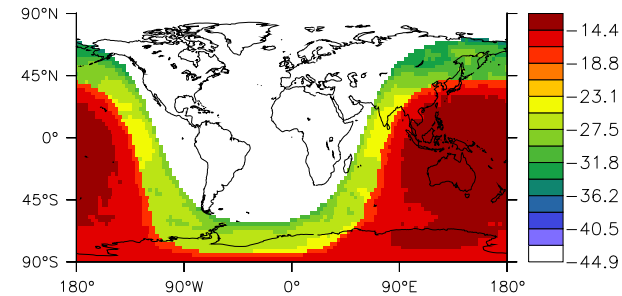

NEW:  $\lg(J(\text{CO}_2))$

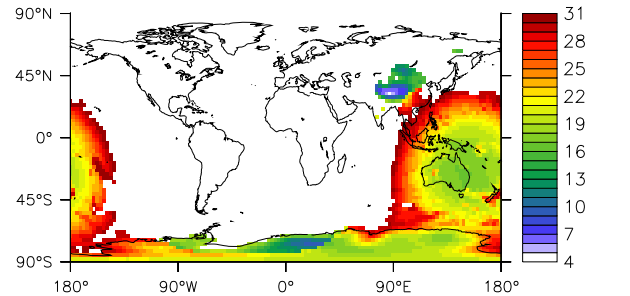

$\lg(\text{NEW}/\text{OLD})$

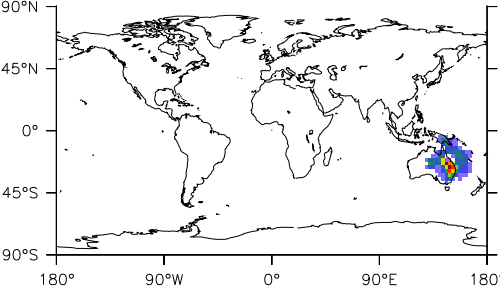

OLD: J(HCI)

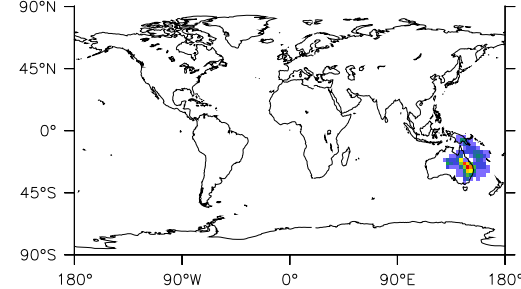

NEW: J(HCI)

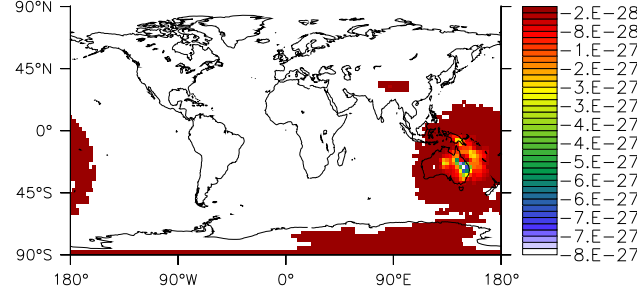

NEW-OLD

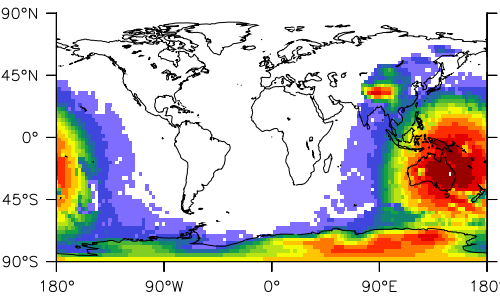

OLD:  $\lg(J(HCI))$

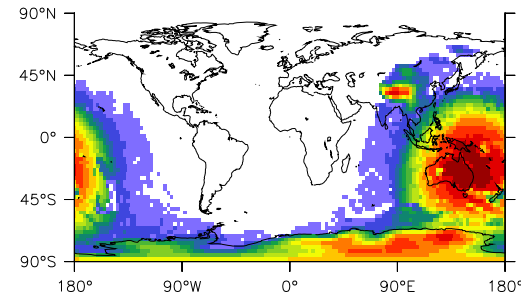

NEW:  $\lg(J(HCI))$

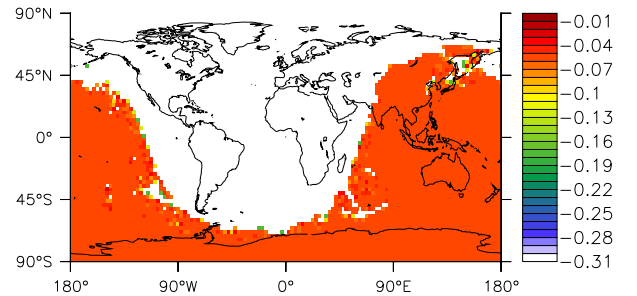

$\lg(NEW/OLD)$

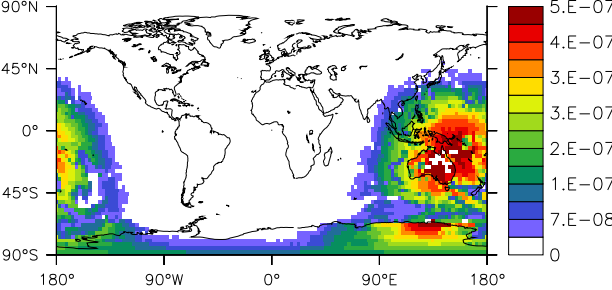

OLD:  $J(\text{CHCl}_2\text{Br})$

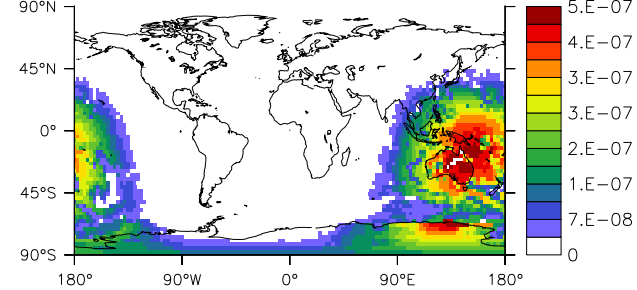

NEW:  $J(\text{CHCl}_2\text{Br})$

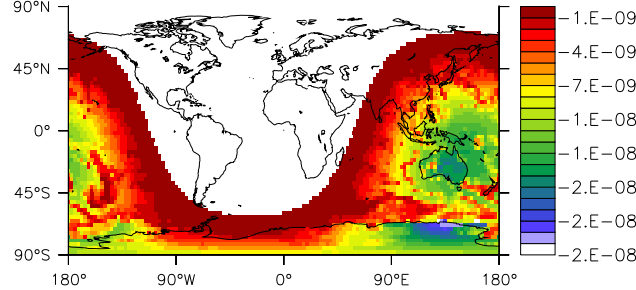

NEW-OLD

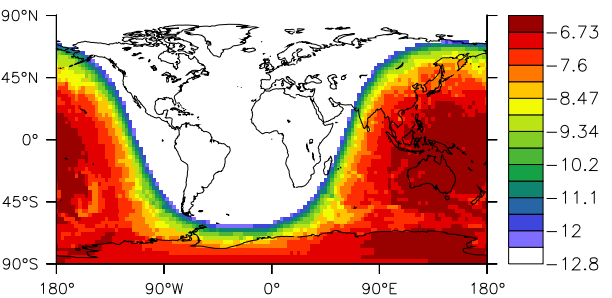

OLD:  $\lg(J(\text{CHCl}_2\text{Br}))$

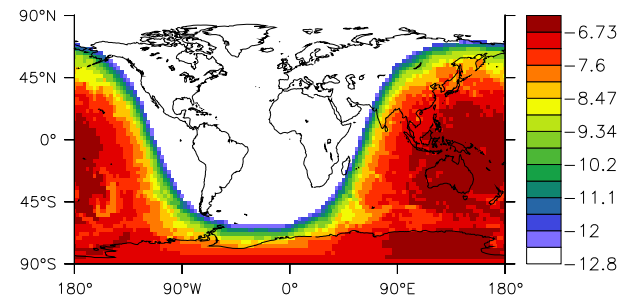

NEW:  $\lg(J(\text{CHCl}_2\text{Br}))$

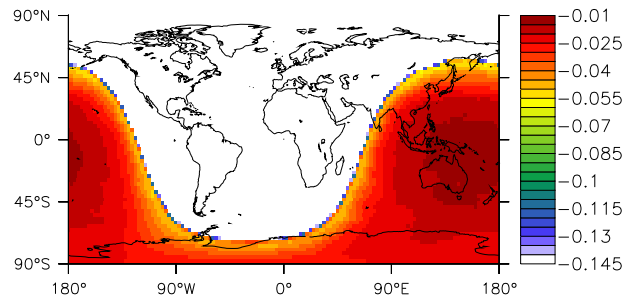

$\lg(\text{NEW}/\text{OLD})$

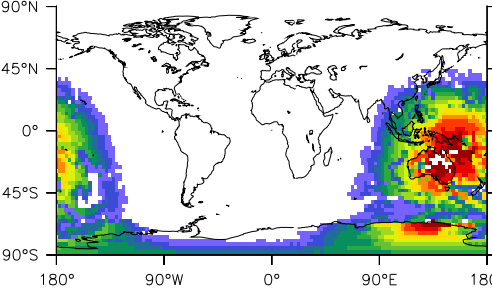

OLD:  $J(\text{CHClBr}_2)$

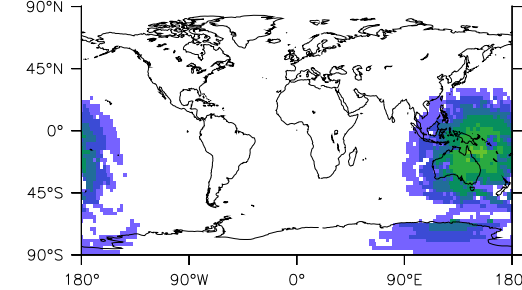

NEW:  $J(\text{CHClBr}_2)$

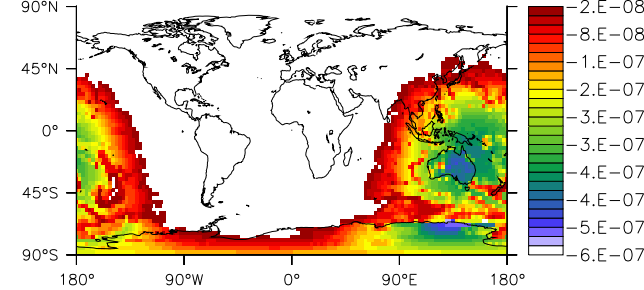

NEW-OLD

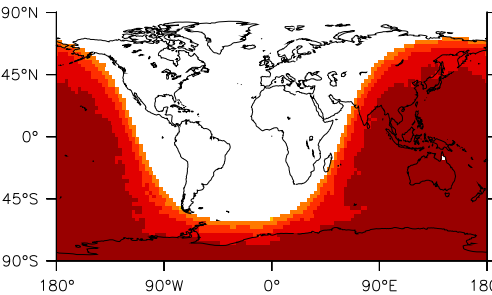

OLD:  $\lg(J(\text{CHClBr}_2))$

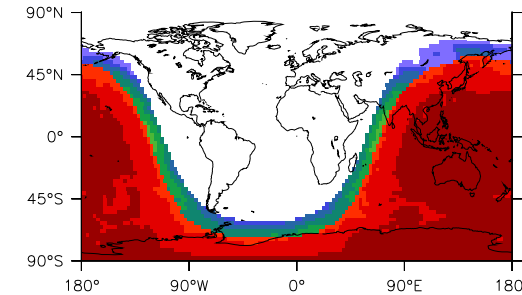

NEW:  $\lg(J(\text{CHClBr}_2))$

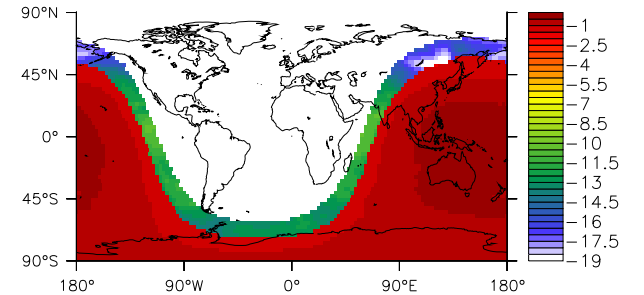

$\lg(\text{NEW}/\text{OLD})$

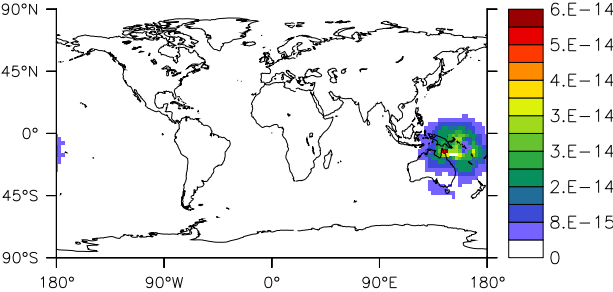

OLD:  $J(\text{CH}_2\text{ClBr})$

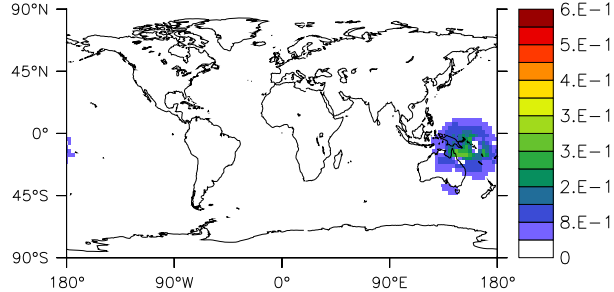

NEW:  $J(\text{CH}_2\text{ClBr})$

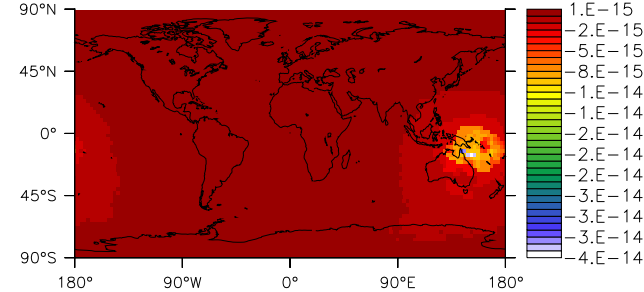

NEW-OLD

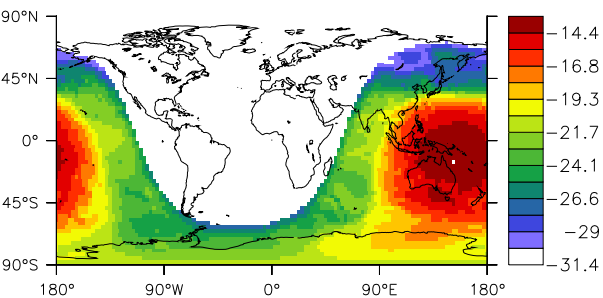

OLD:  $\lg(J(\text{CH}_2\text{ClBr}))$

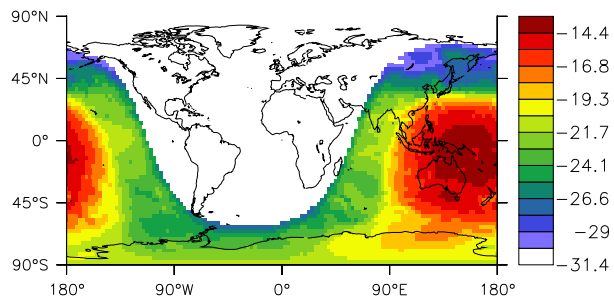

NEW:  $\lg(J(\text{CH}_2\text{ClBr}))$

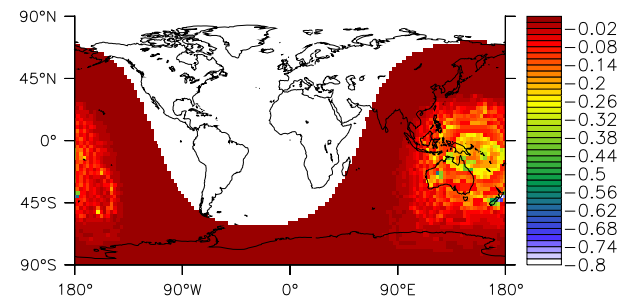

$\lg(\text{NEW}/\text{OLD})$

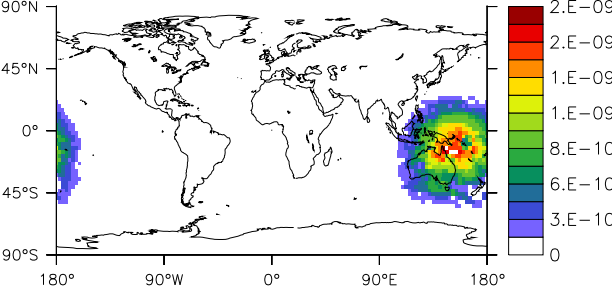

OLD:  $J(\text{CH}_2\text{Br}_2)$

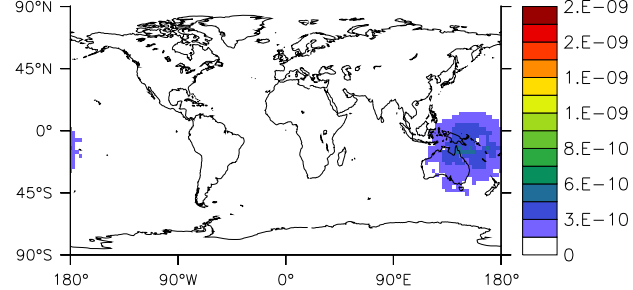

NEW:  $J(\text{CH}_2\text{Br}_2)$

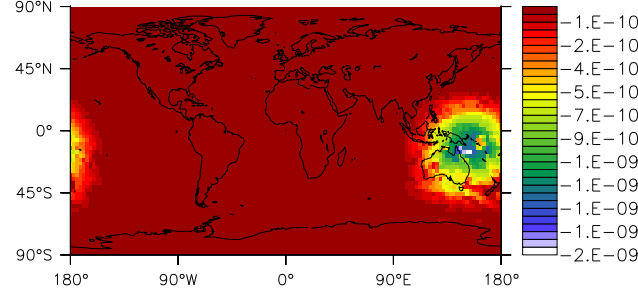

NEW-OLD

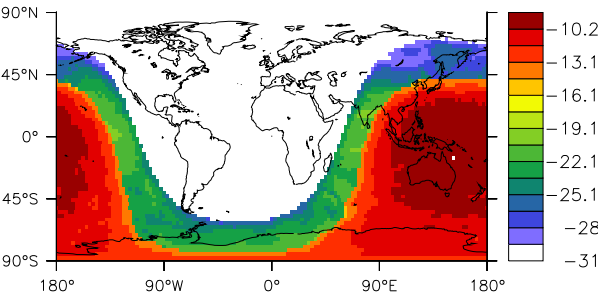

OLD:  $\lg(J(\text{CH}_2\text{Br}_2))$

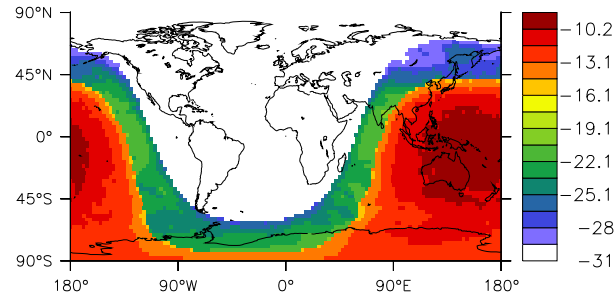

NEW:  $\lg(J(\text{CH}_2\text{Br}_2))$

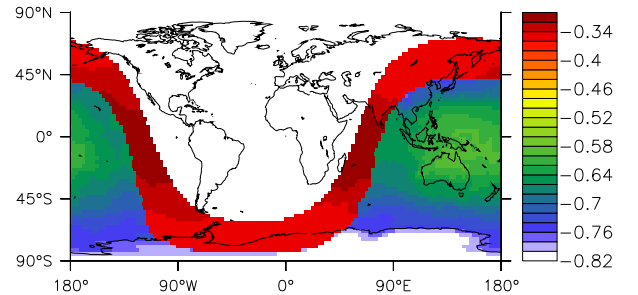

$\lg(\text{NEW}/\text{OLD})$



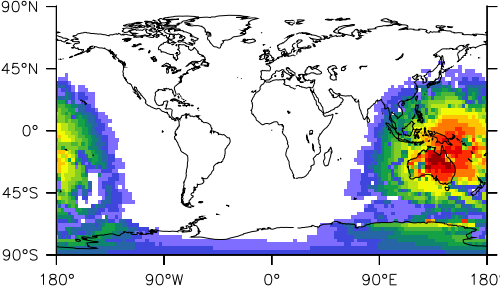

OLD:  $J(\text{CHBr}_3)$

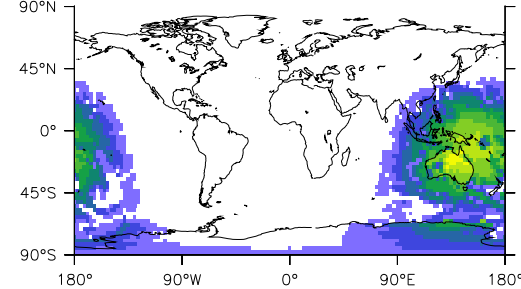

NEW:  $J(\text{CHBr}_3)$

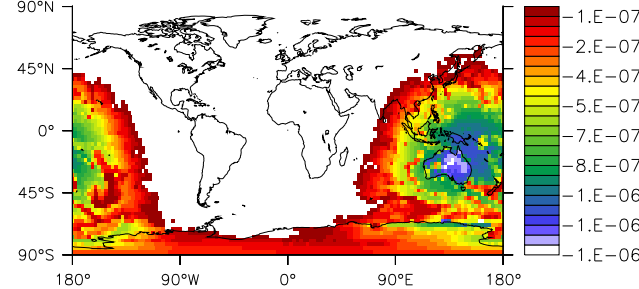

NEW-OLD

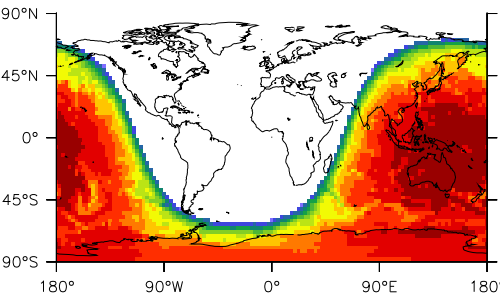

OLD:  $\lg(J(\text{CHBr}_3))$

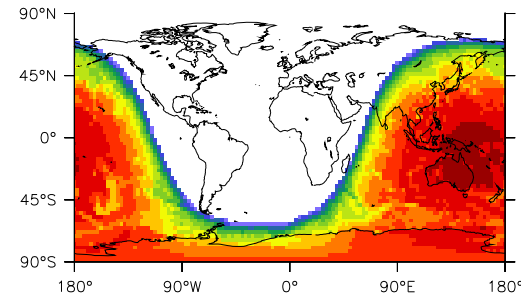

NEW:  $\lg(J(\text{CHBr}_3))$

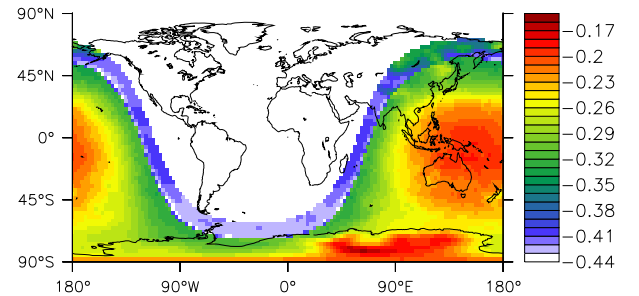

$\lg(\text{NEW}/\text{OLD})$

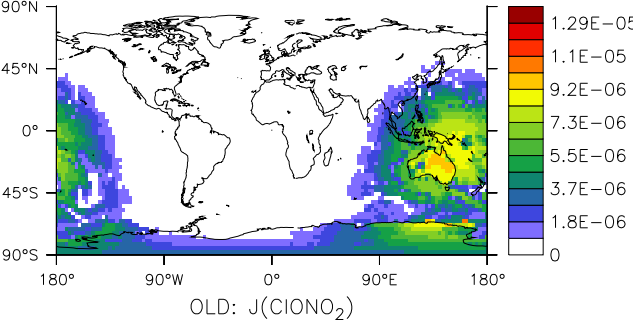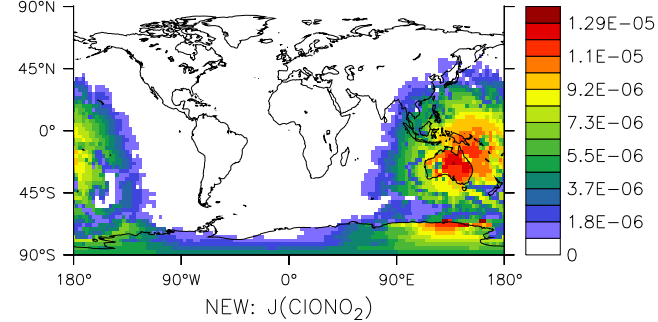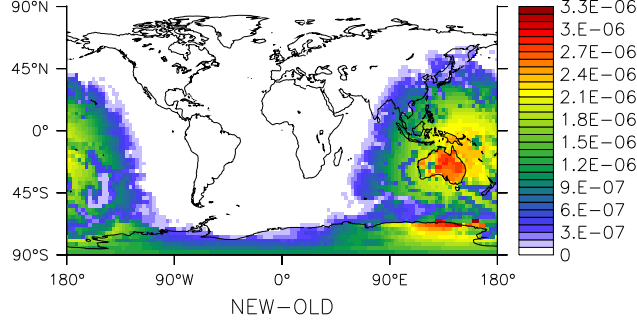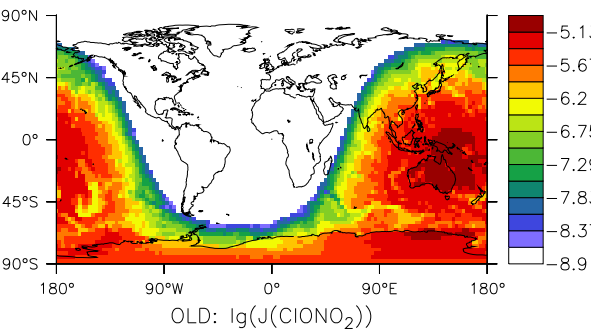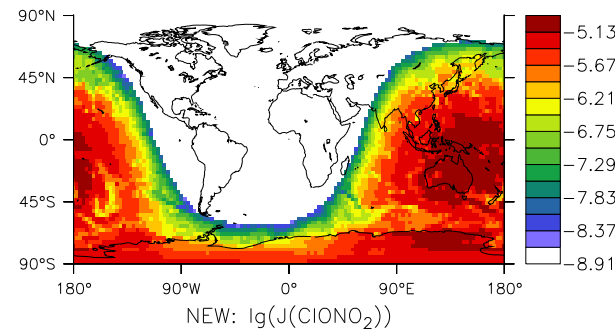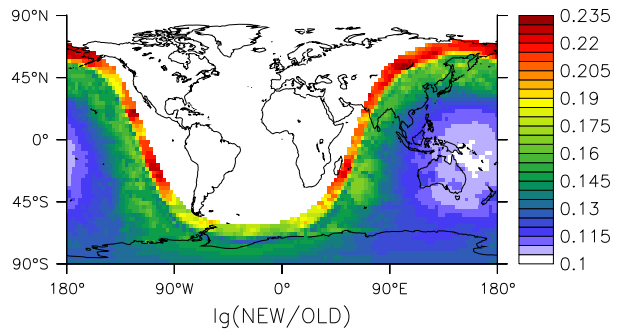

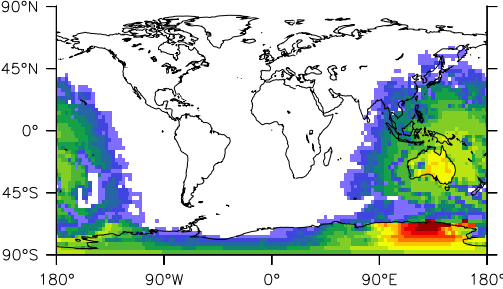

OLD:  $J(\text{MACR})$

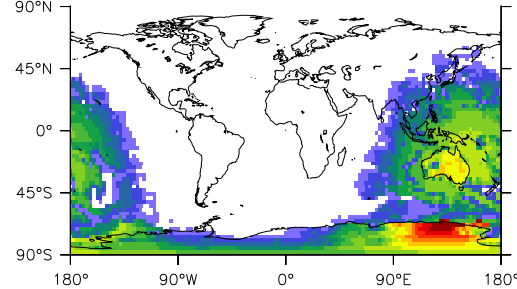

NEW:  $J(\text{MACR})$

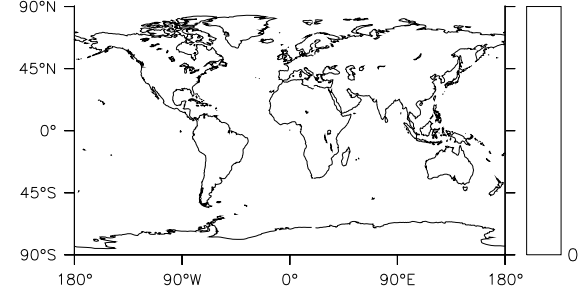

NEW-OLD

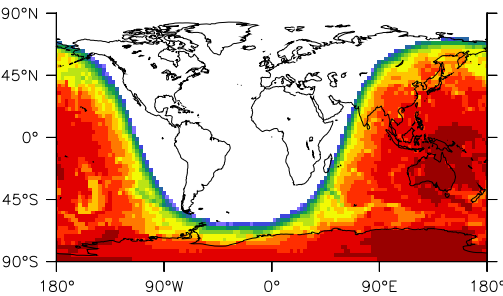

OLD:  $\lg(J(\text{MACR}))$

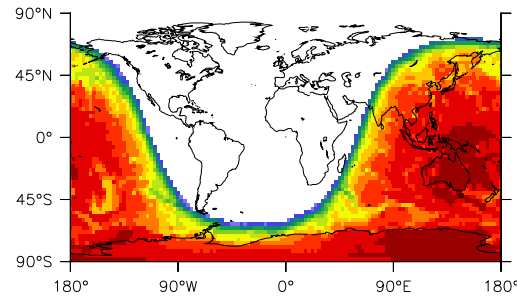

NEW:  $\lg(J(\text{MACR}))$

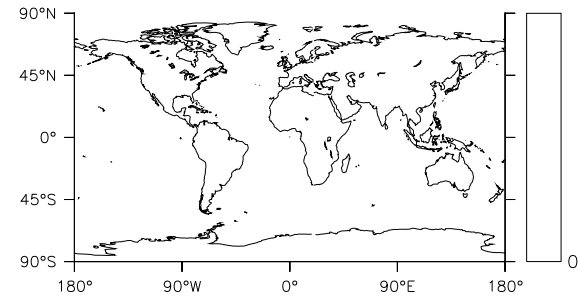

$\lg(\text{NEW}/\text{OLD})$

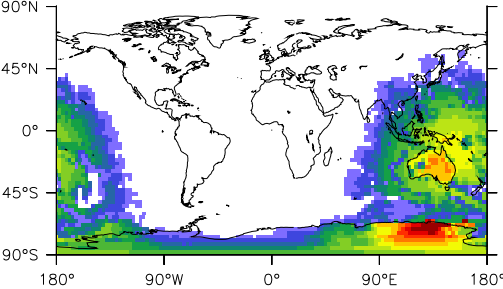

OLD: J(MVK)

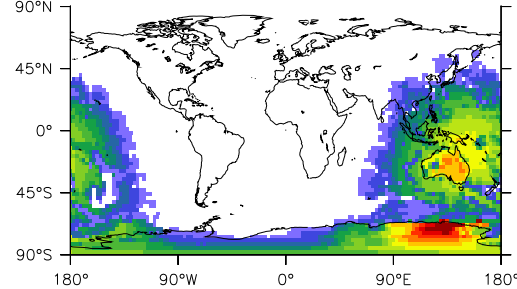

NEW: J(MVK)

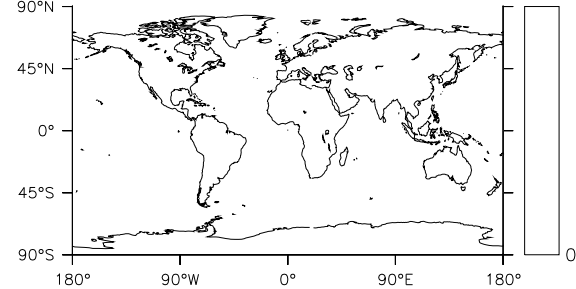

NEW-OLD

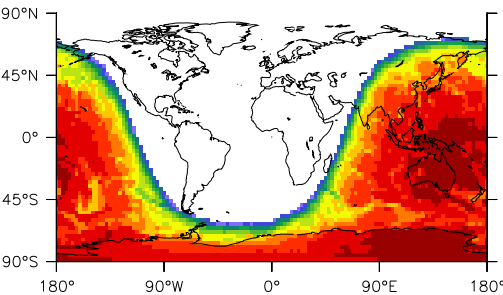

OLD:  $\lg(J(MVK))$

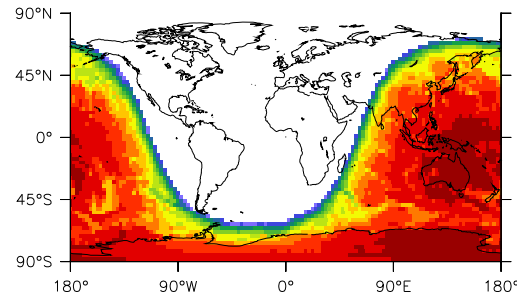

NEW:  $\lg(J(MVK))$

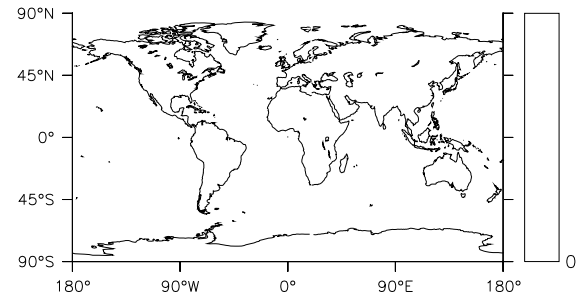

$\lg(NEW/OLD)$

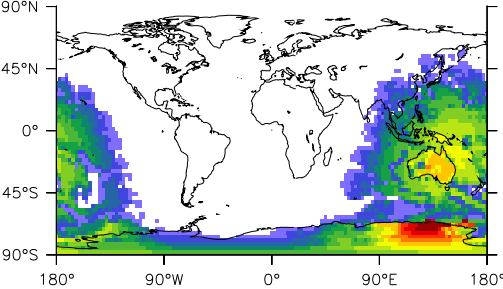

OLD: J(GLYOX)

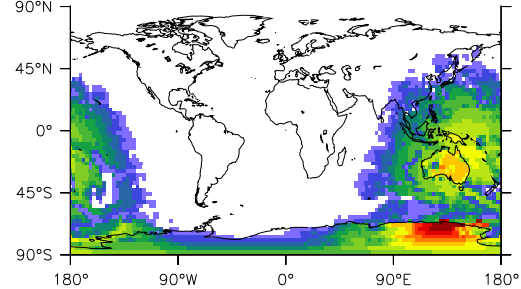

NEW: J(GLYOX)



NEW-OLD

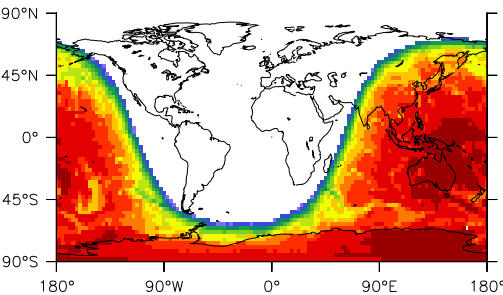

OLD:  $\lg(J(GLYOX))$

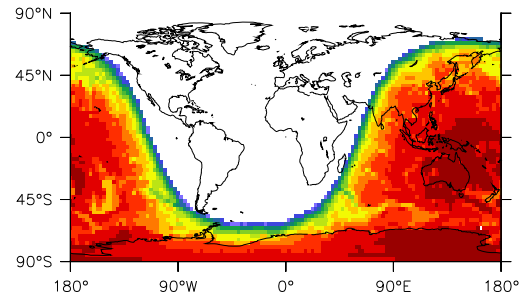

NEW:  $\lg(J(GLYOX))$



$\lg(NEW/OLD)$

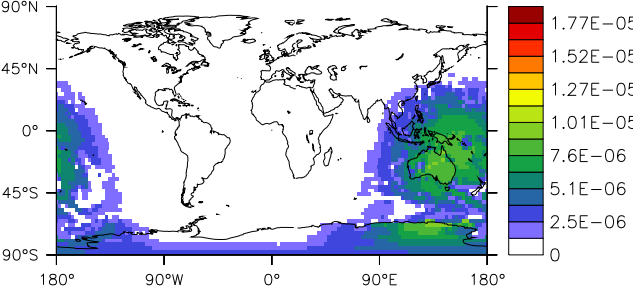

OLD:  $J(\text{HOCH}_2\text{CHO})$

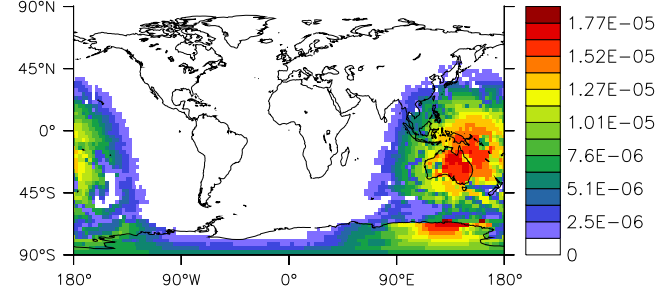

NEW:  $J(\text{HOCH}_2\text{CHO})$

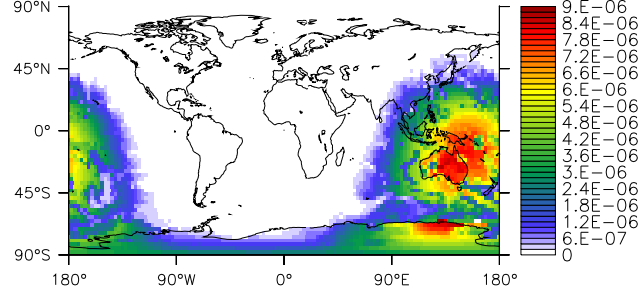

NEW-OLD

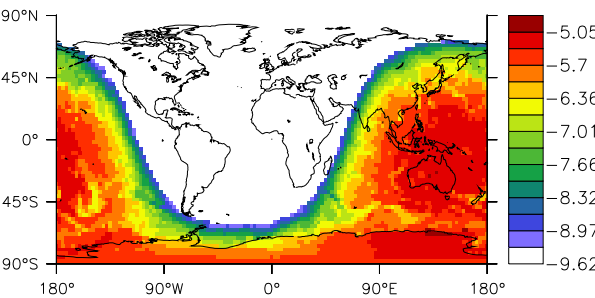

OLD:  $\lg(J(\text{HOCH}_2\text{CHO}))$

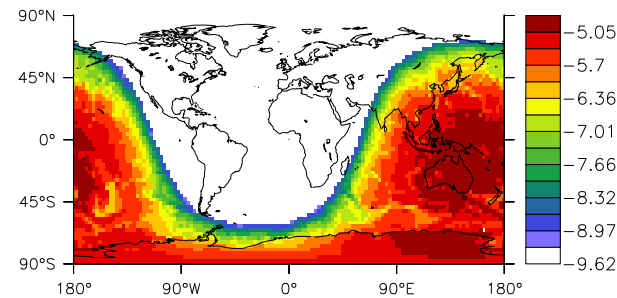

NEW:  $\lg(J(\text{HOCH}_2\text{CHO}))$

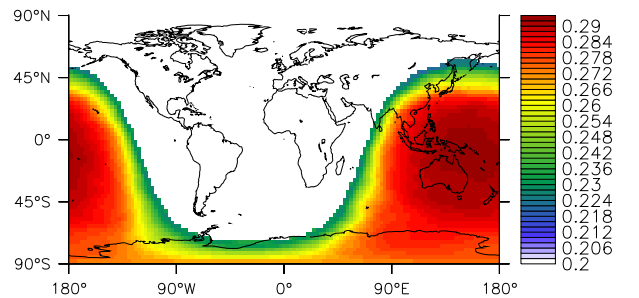

$\lg(\text{NEW}/\text{OLD})$

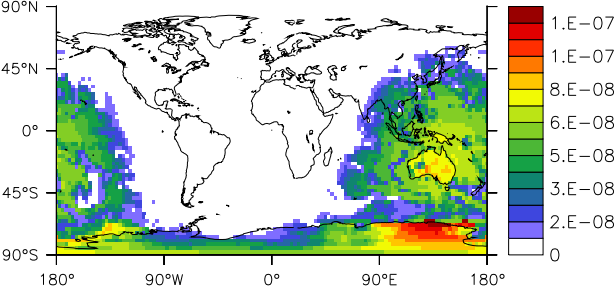

OLD:  $J(\text{H}_2\text{SO}_4)$

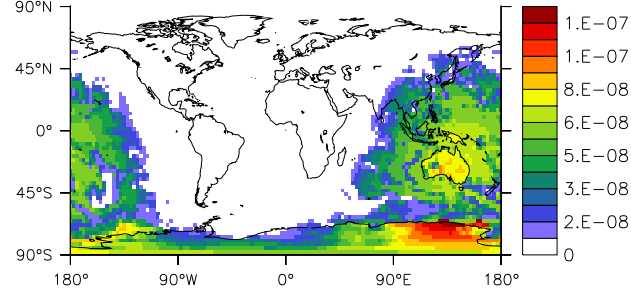

NEW:  $J(\text{H}_2\text{SO}_4)$

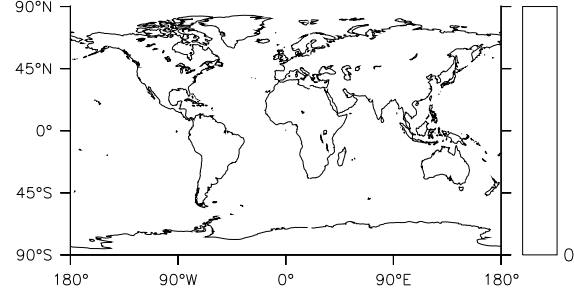

NEW-OLD

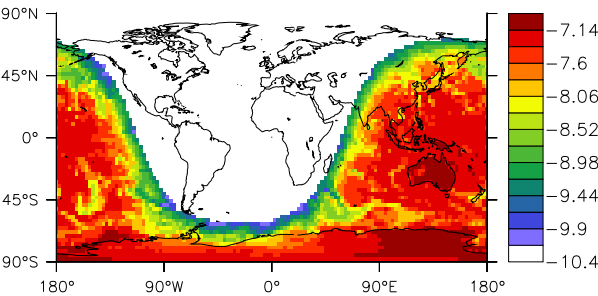

OLD:  $\lg(J(\text{H}_2\text{SO}_4))$

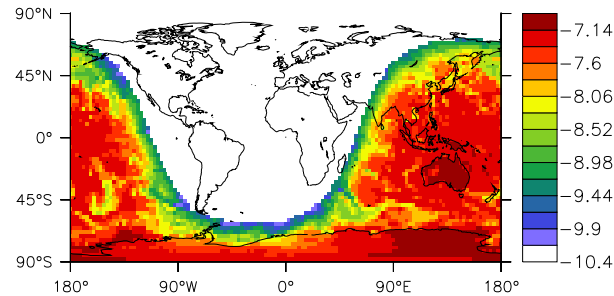

NEW:  $\lg(J(\text{H}_2\text{SO}_4))$

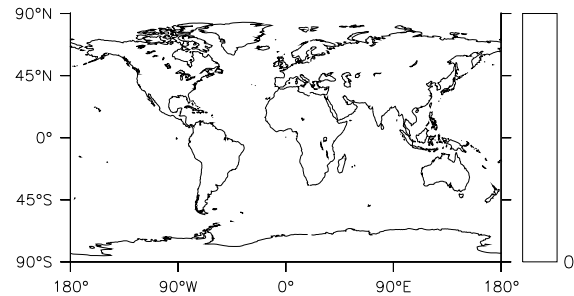

$\lg(\text{NEW}/\text{OLD})$
