# Supplementary figures and images for: The photolysis module JVAL-14, compatible with the MESSy standard, and the JVal PreProcessor (JVPP)
Source: Copernicus journal article supplement (doi:10.5194/gmd-7-2653-2014), 2014-11-13

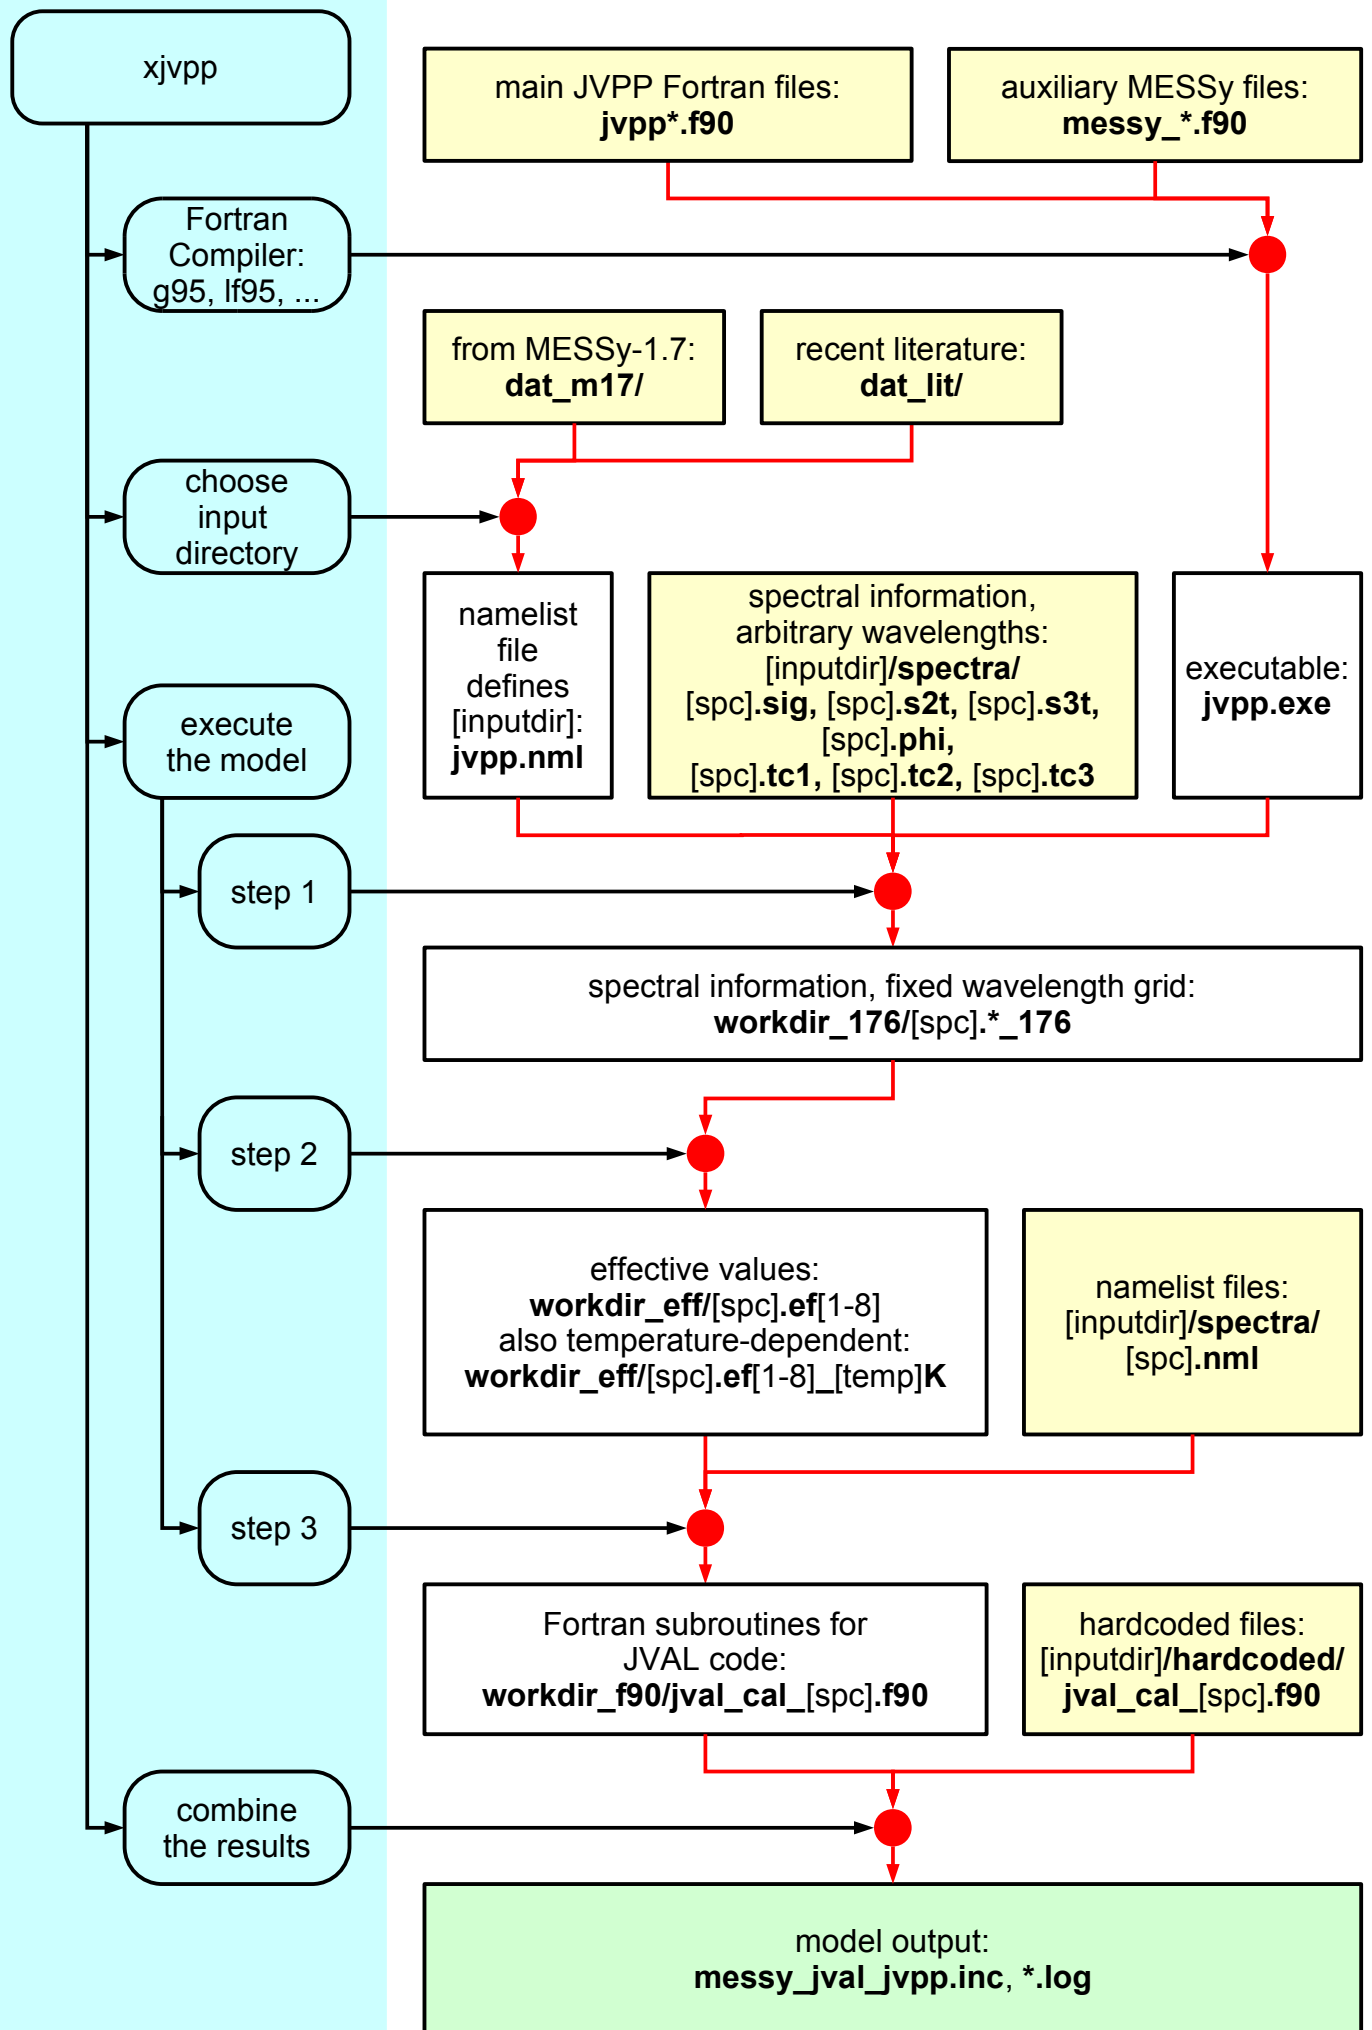

Supplement: Supplementary file 3 [file gmd-7-2653-2014-supplement.zip]

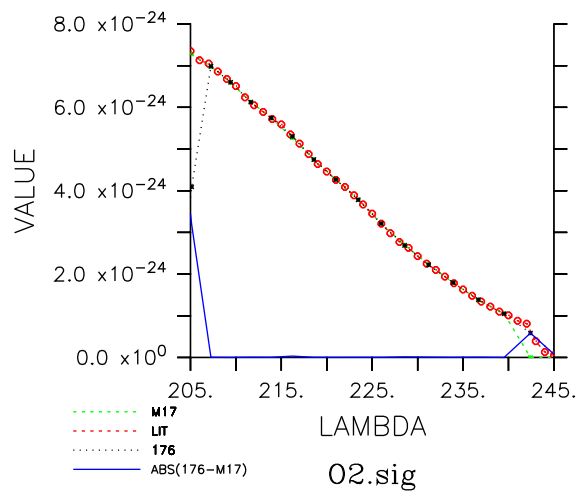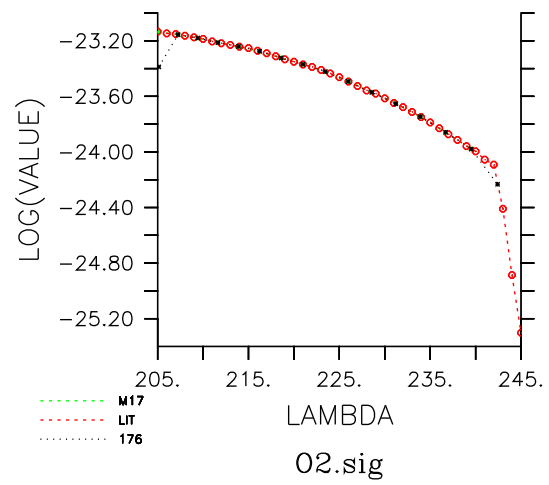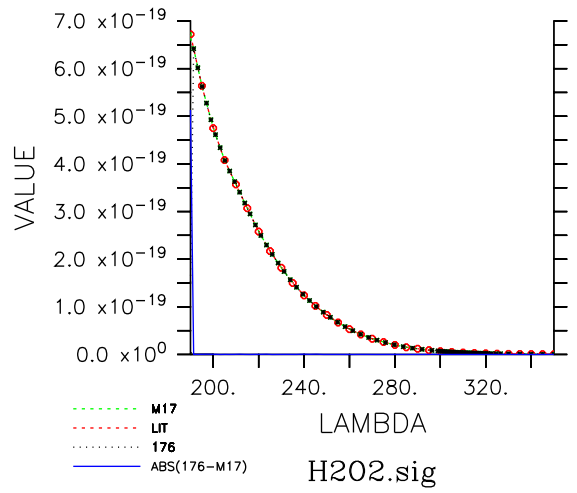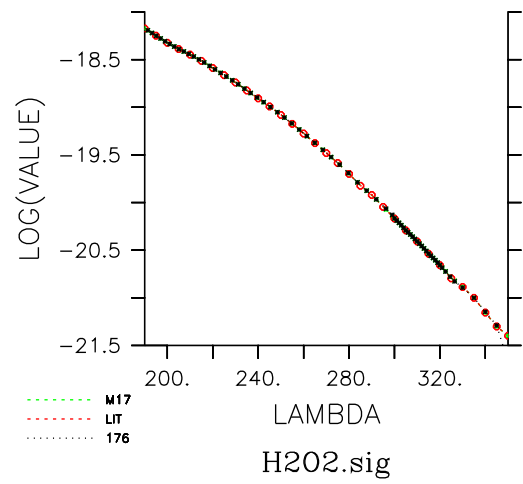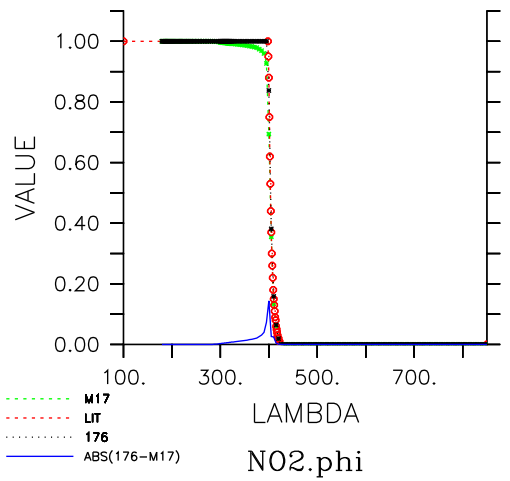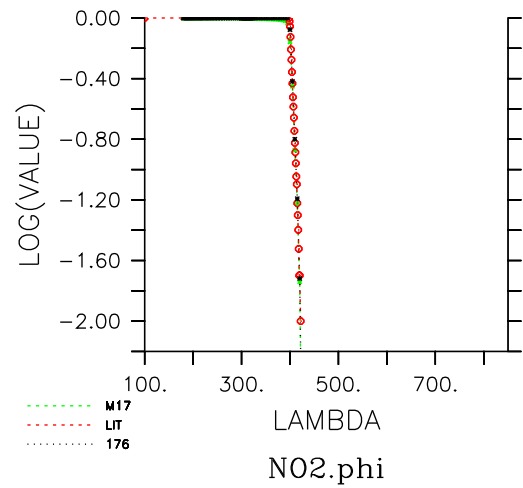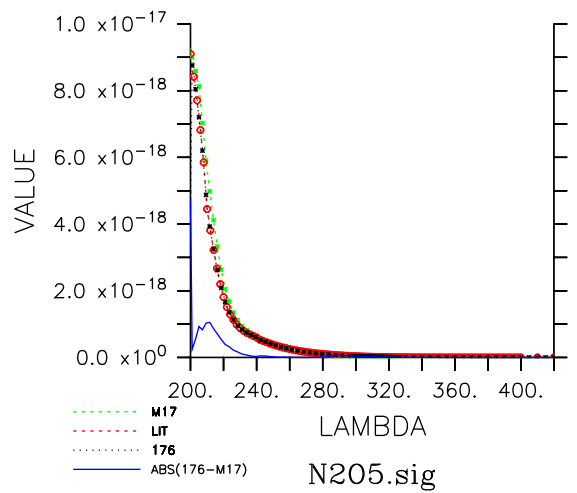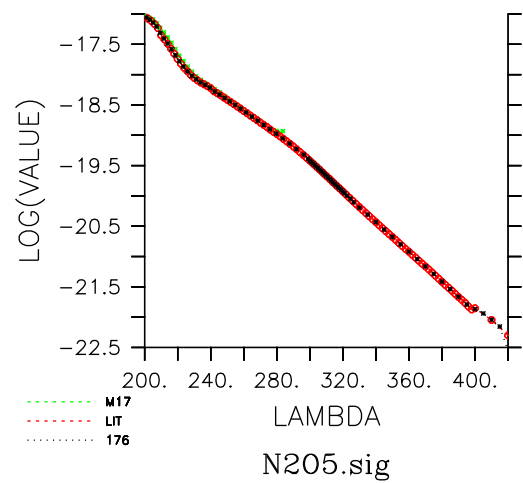

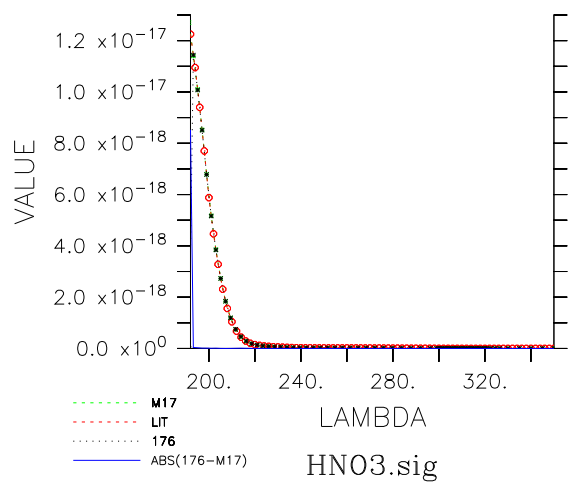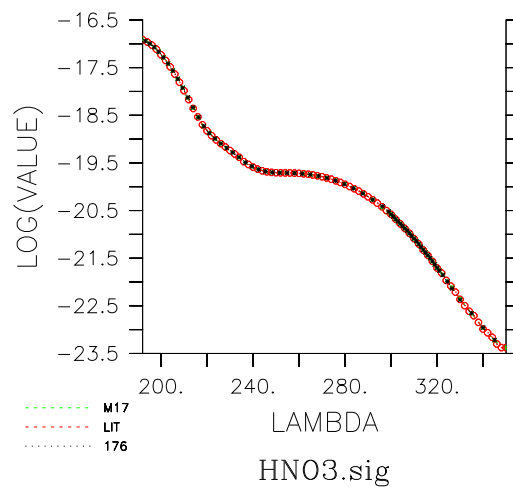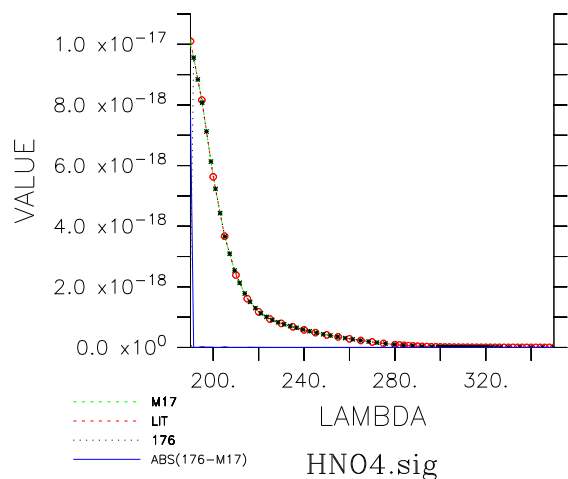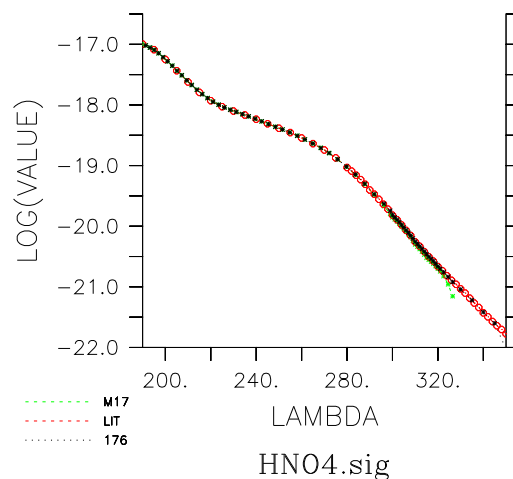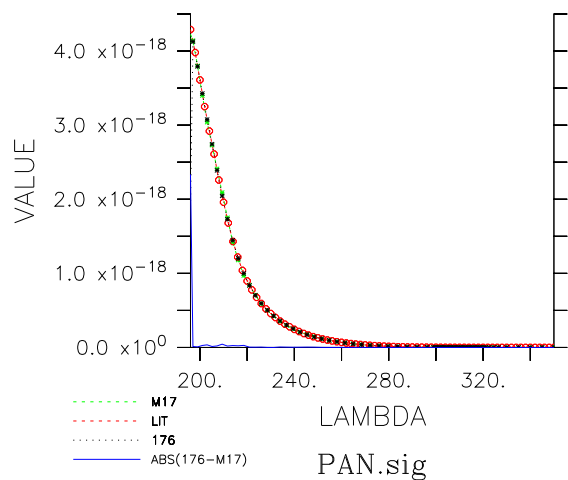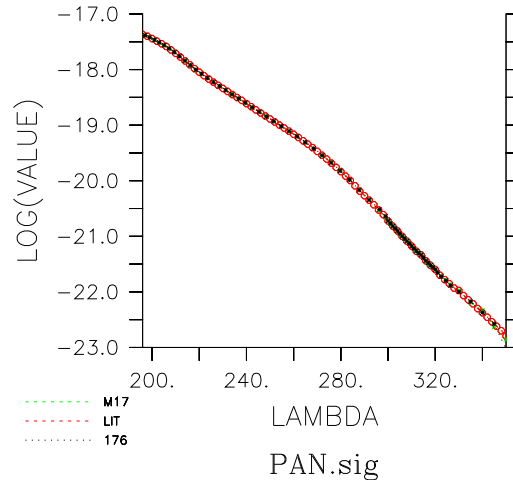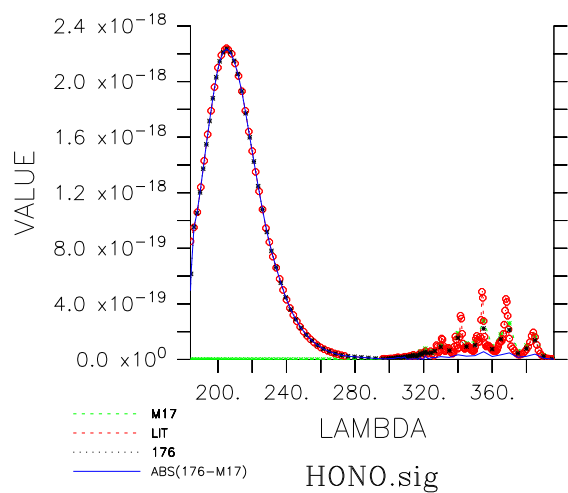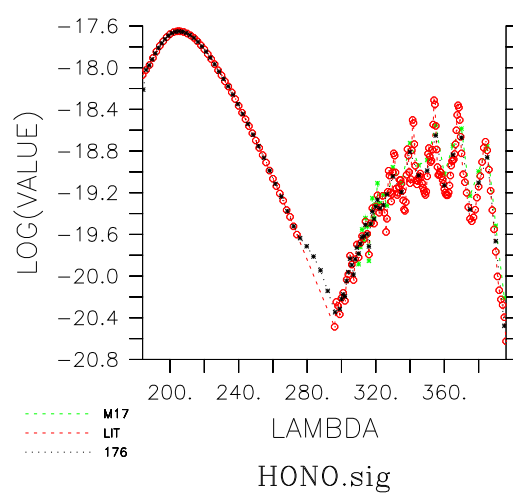

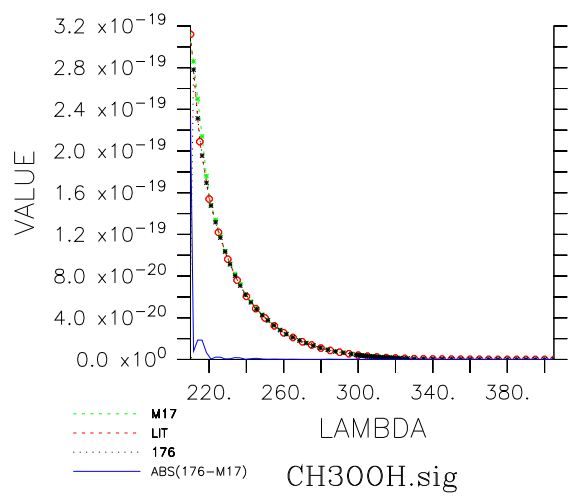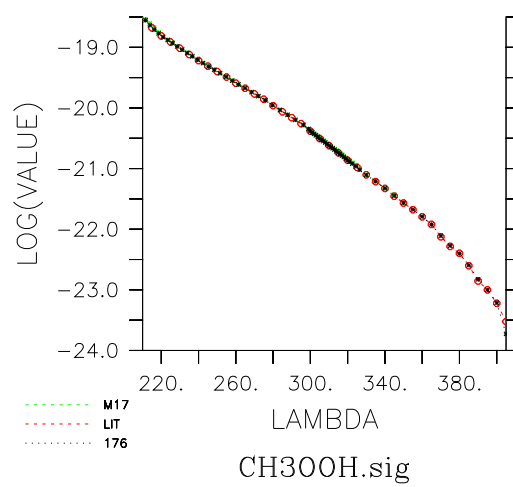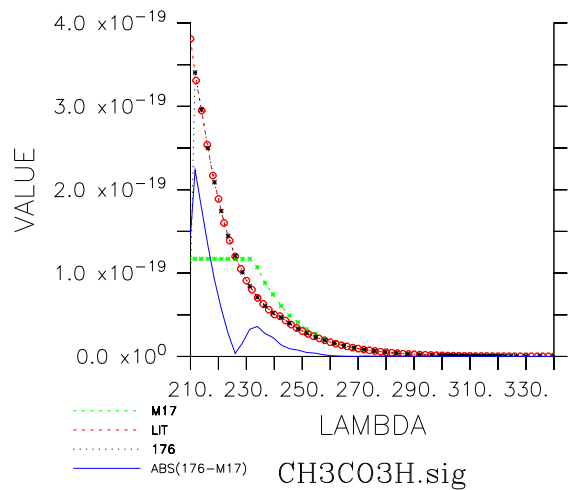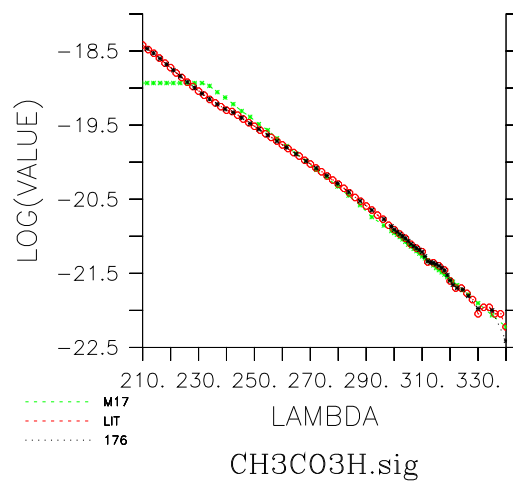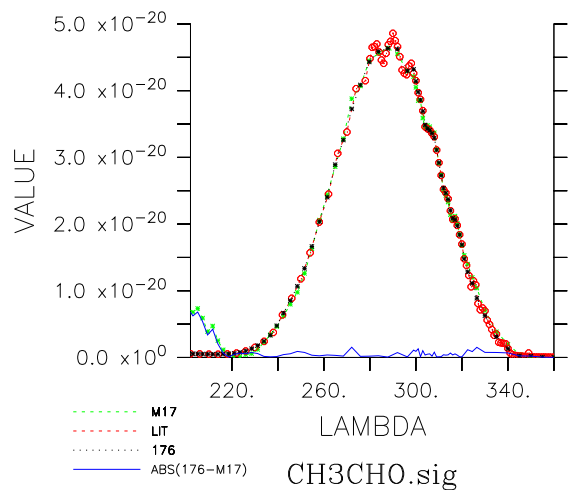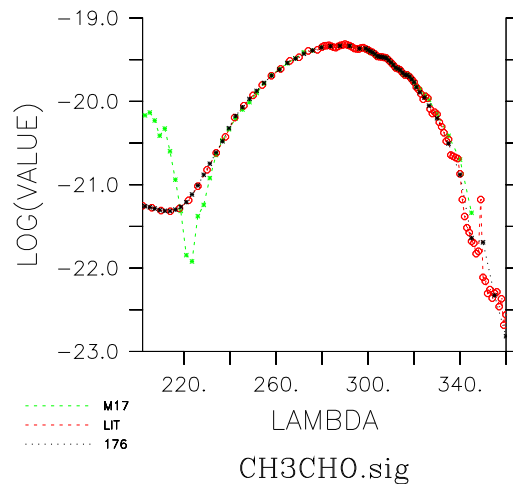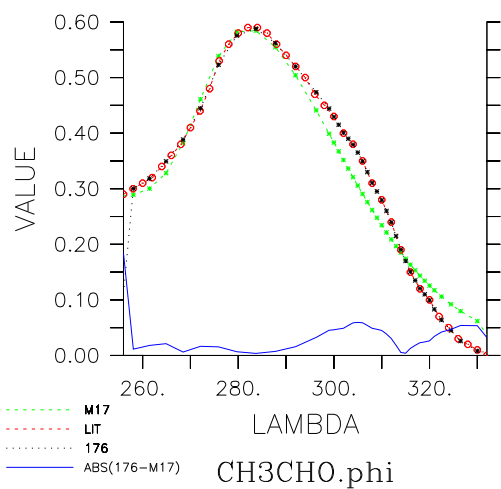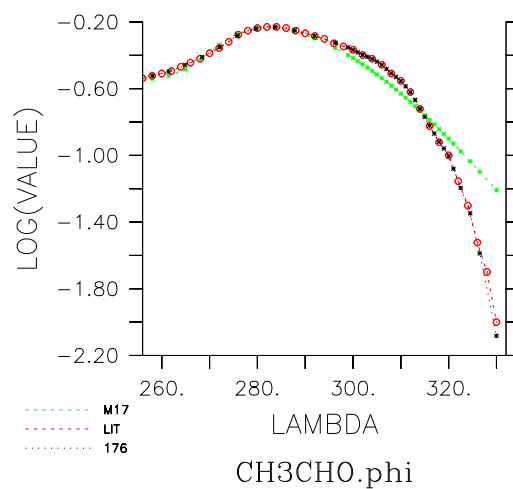

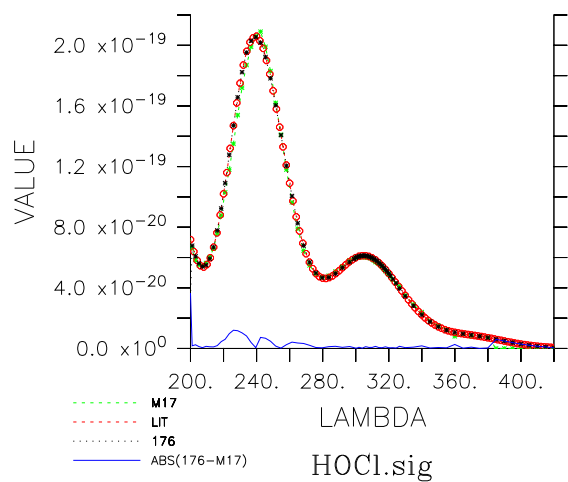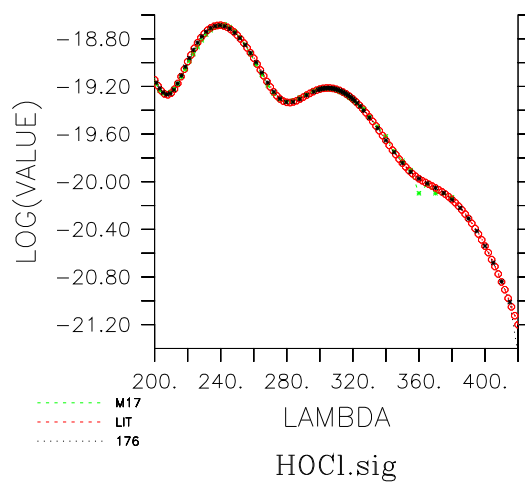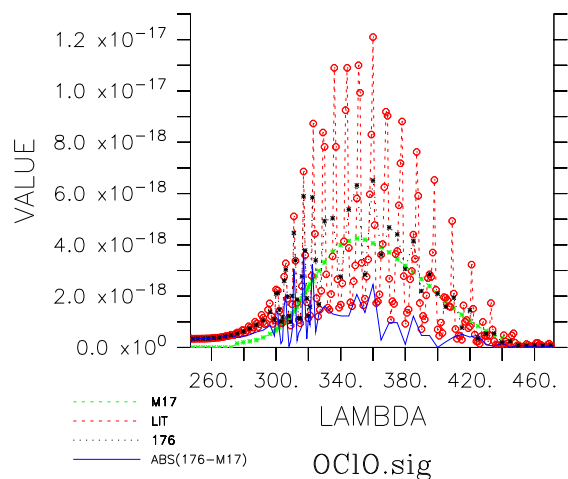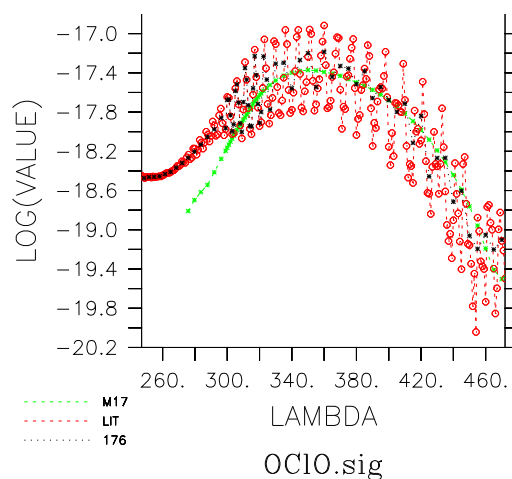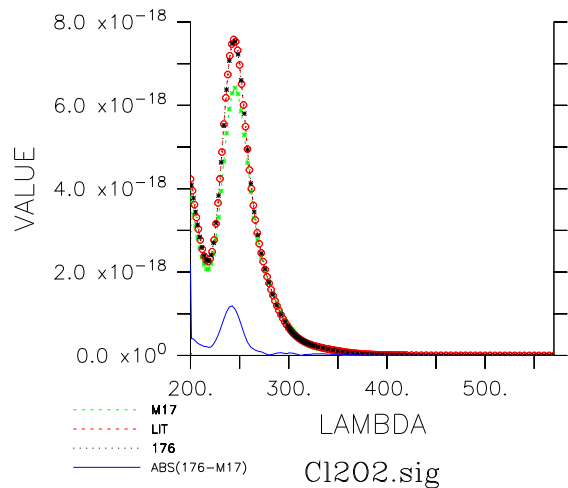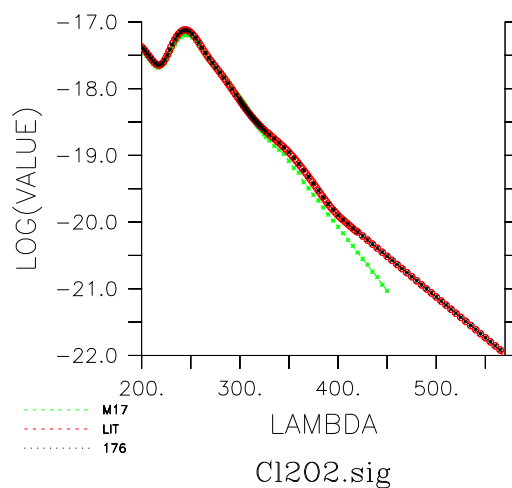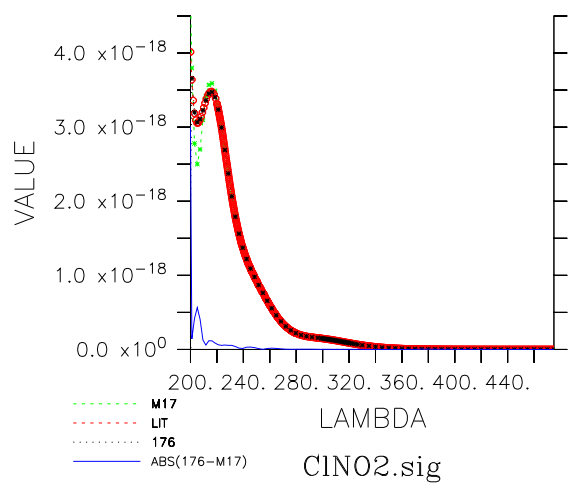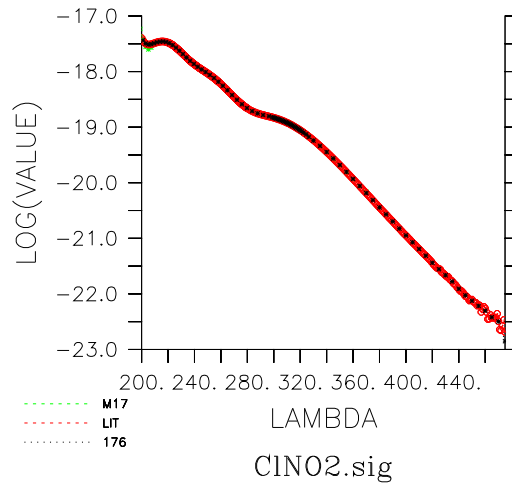

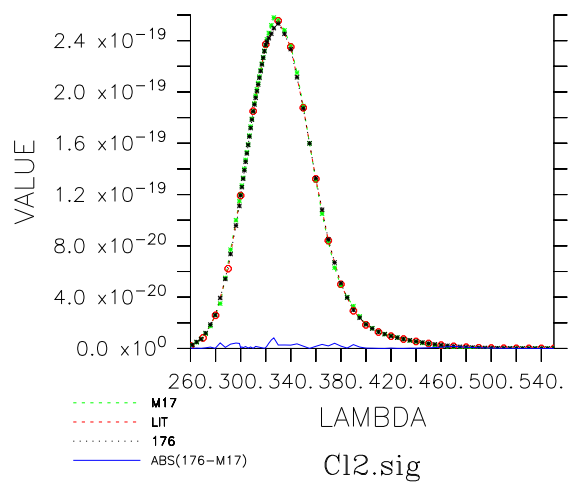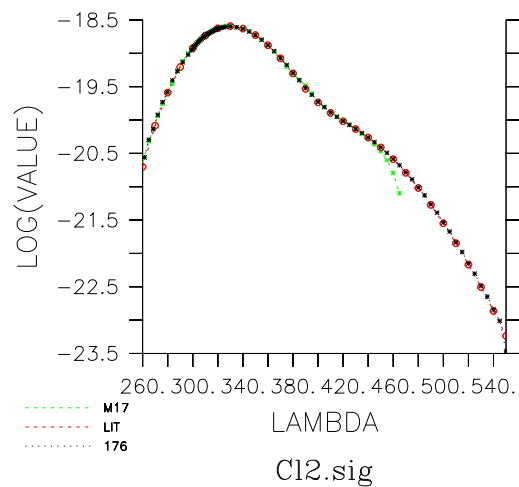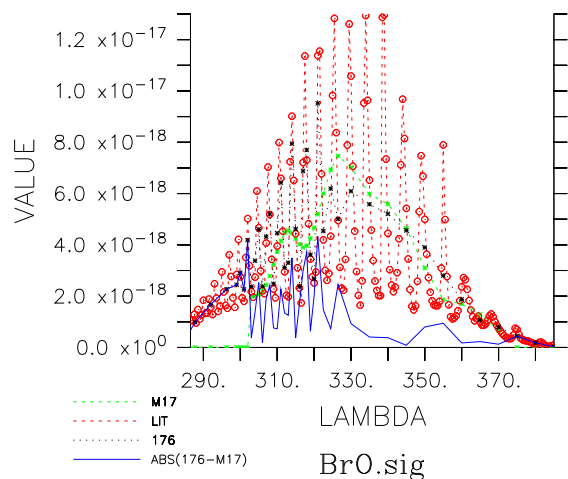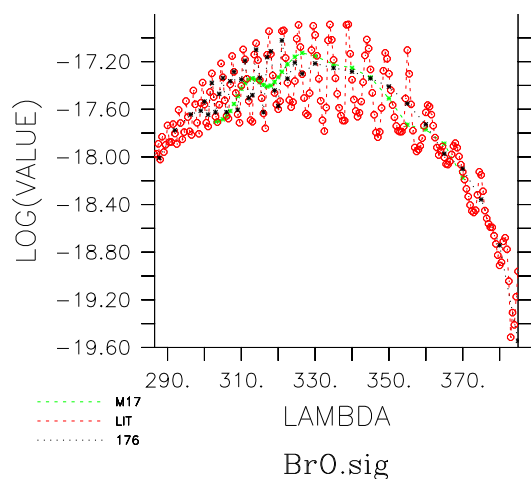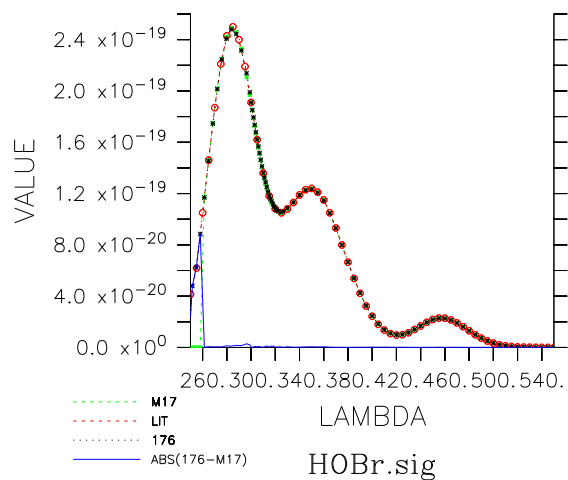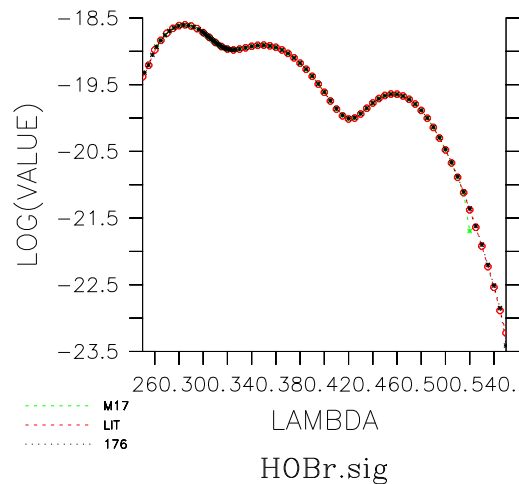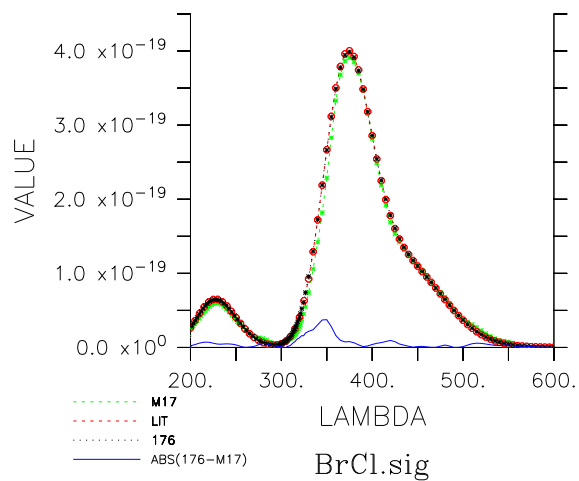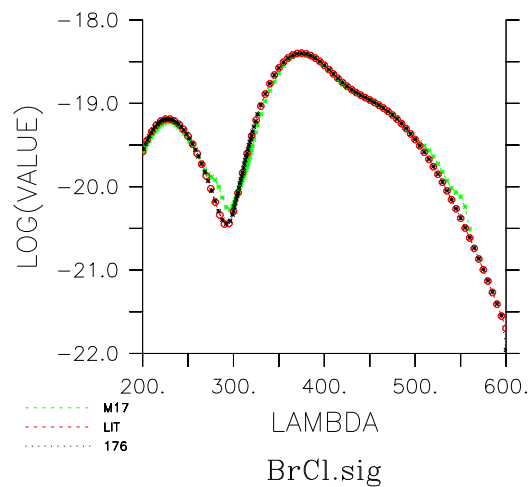

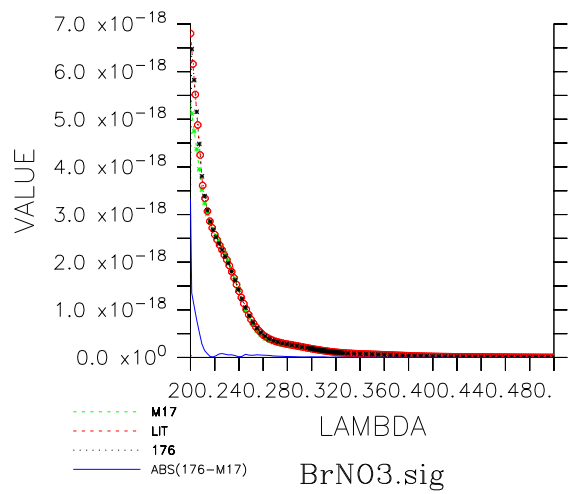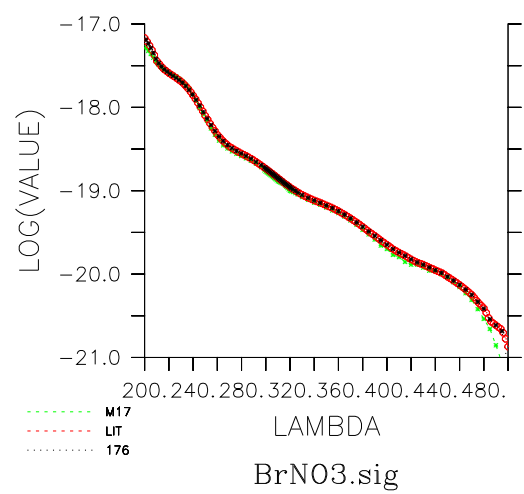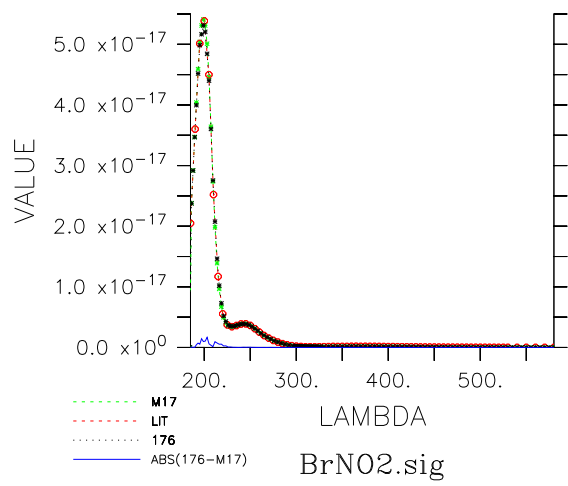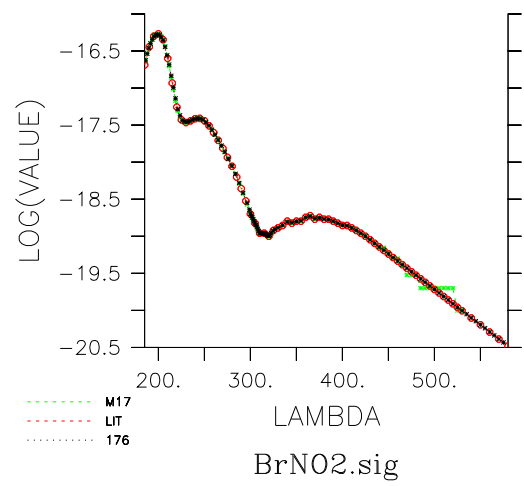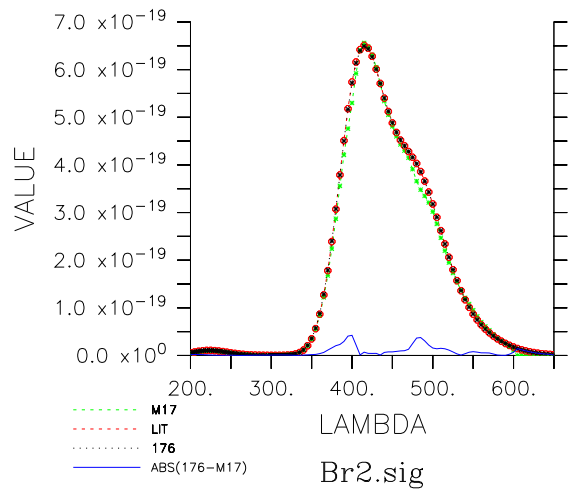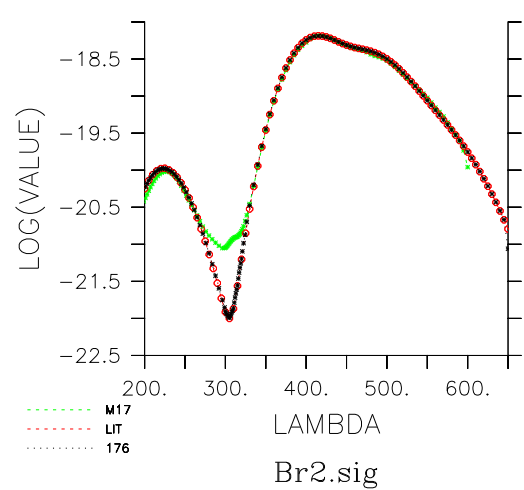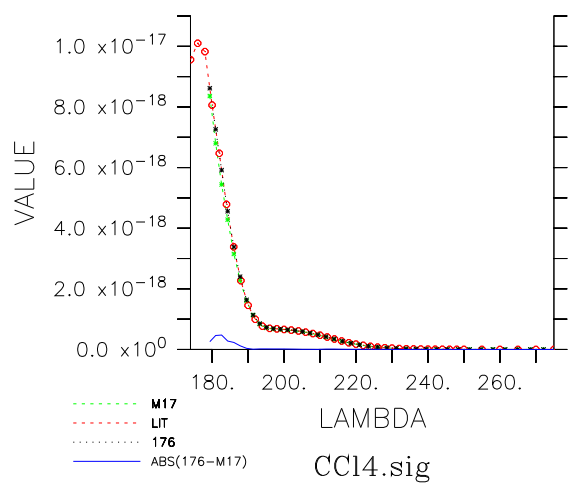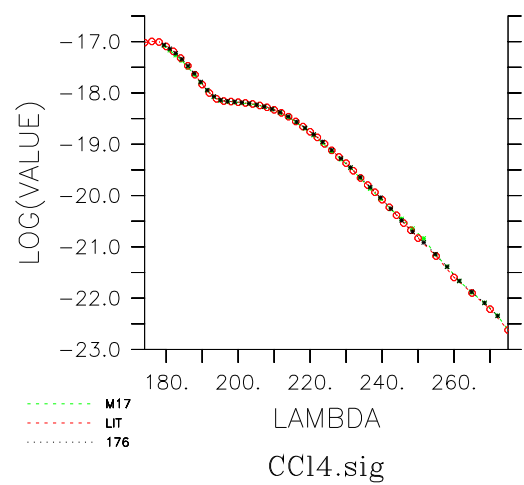

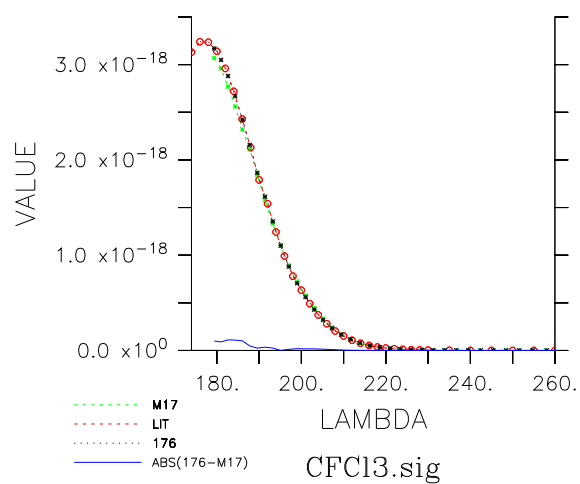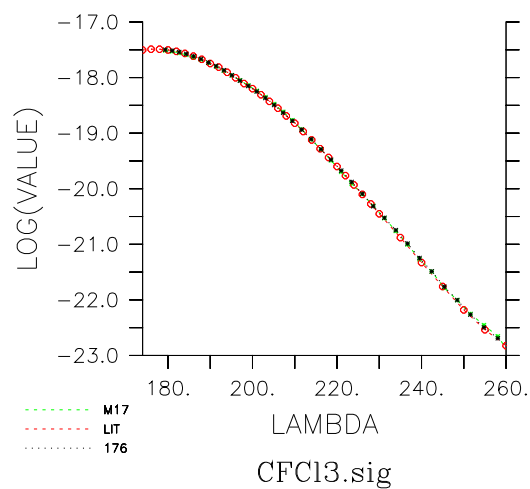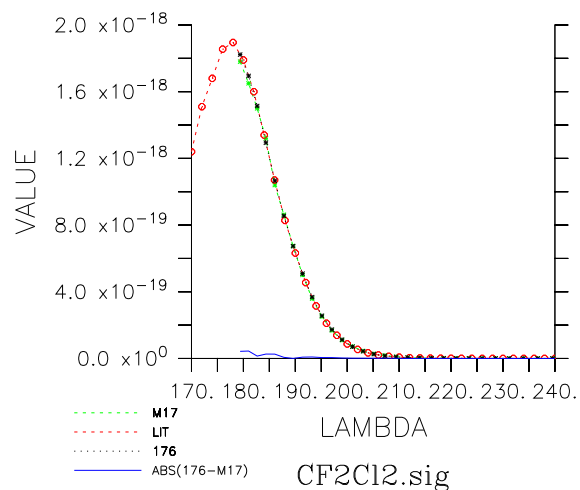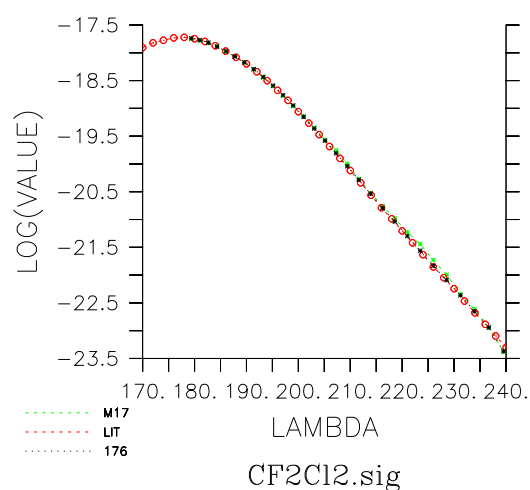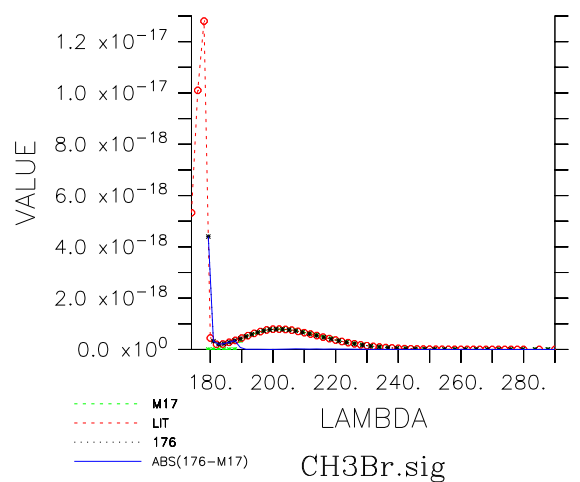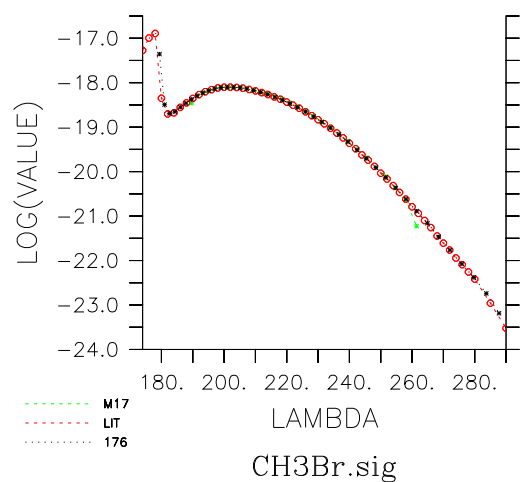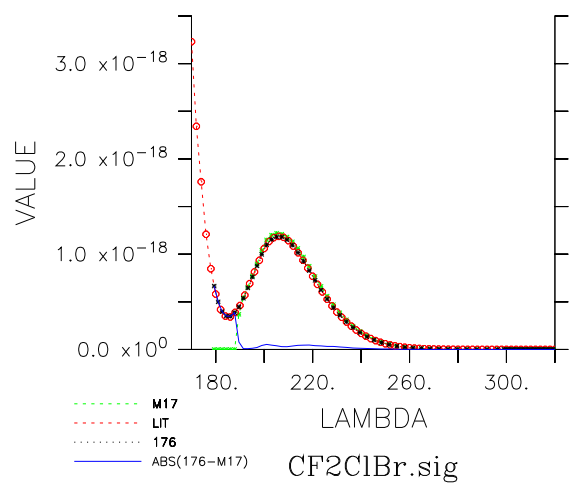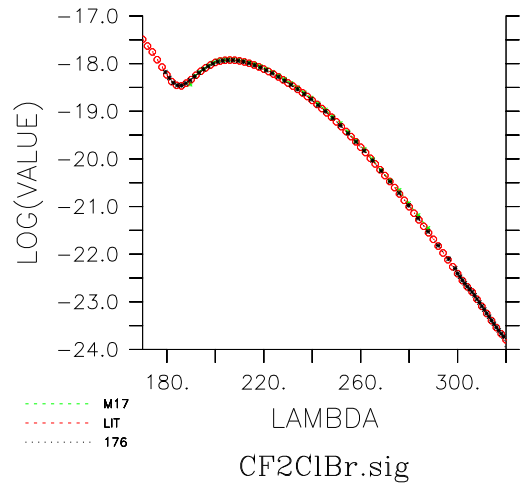

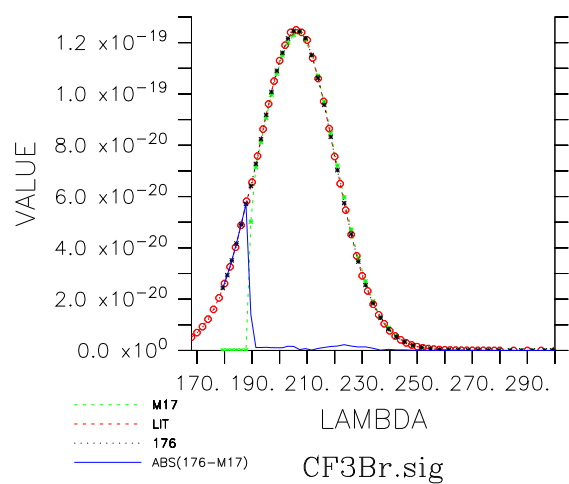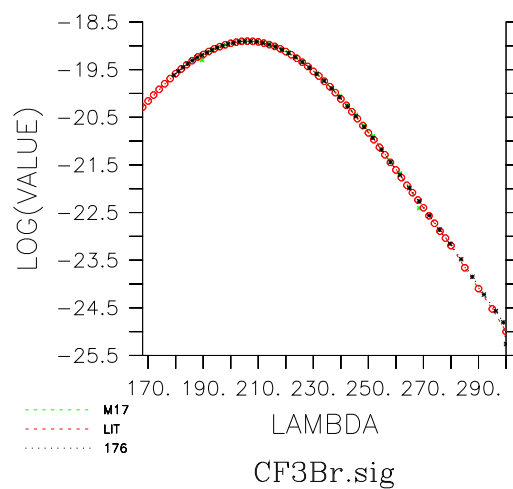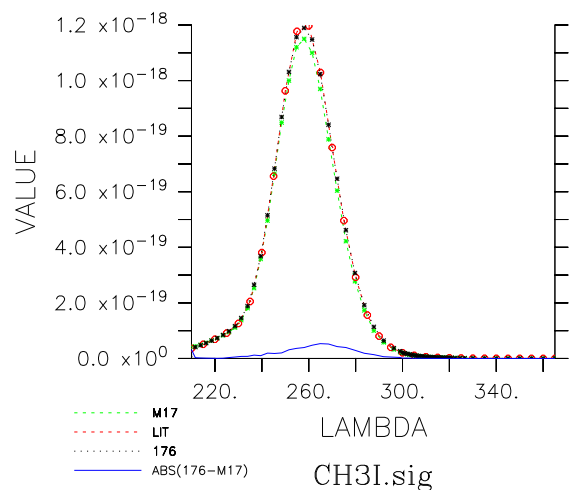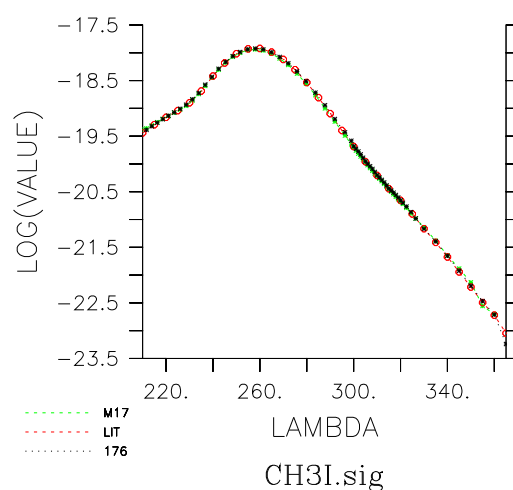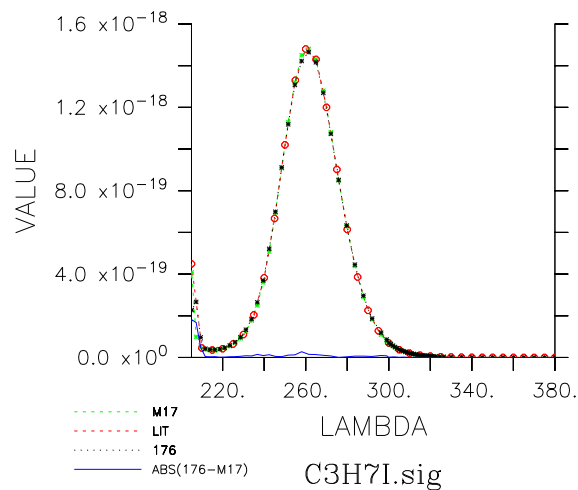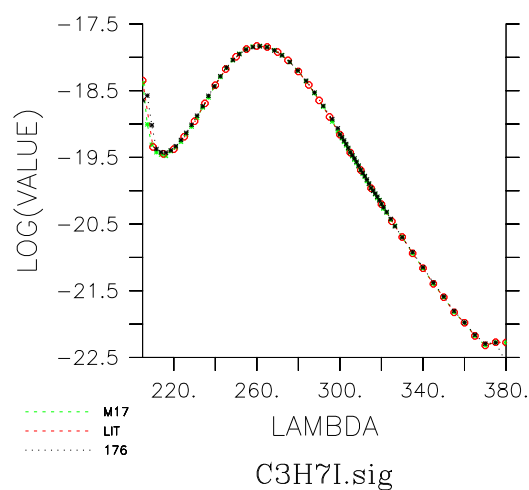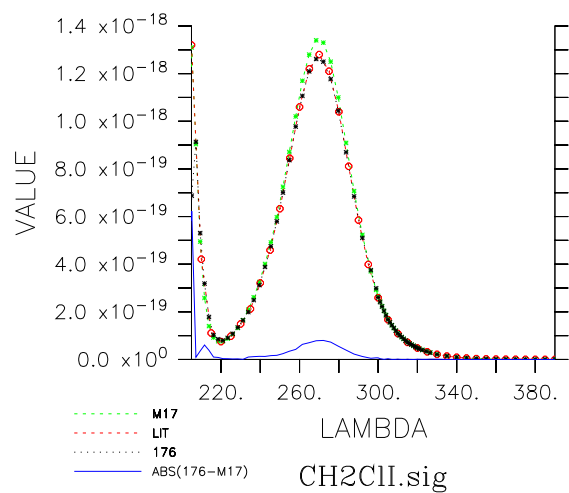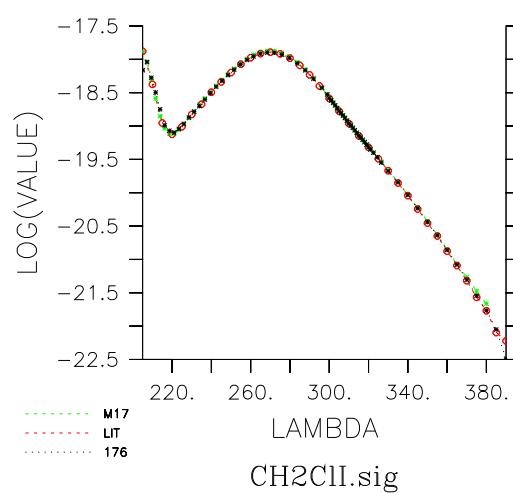



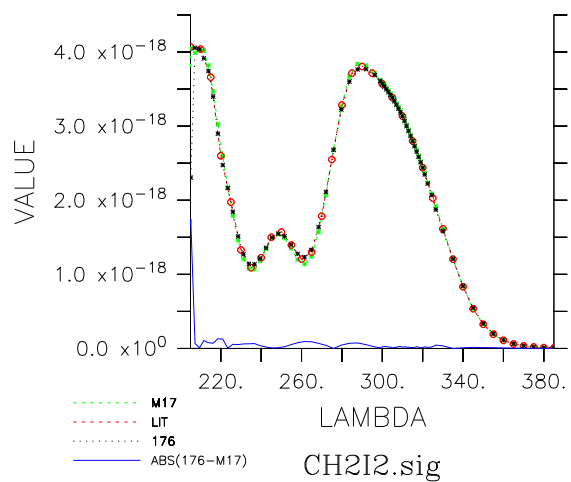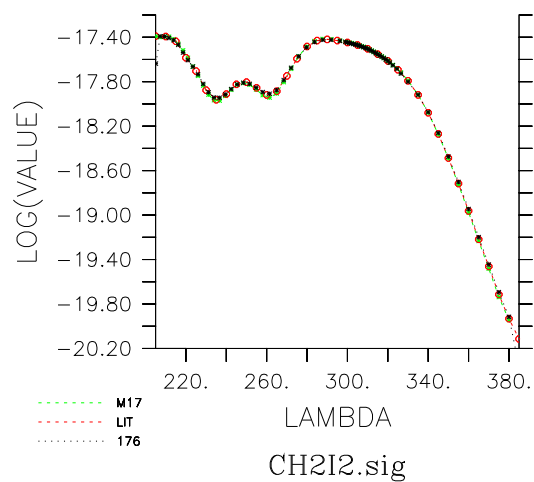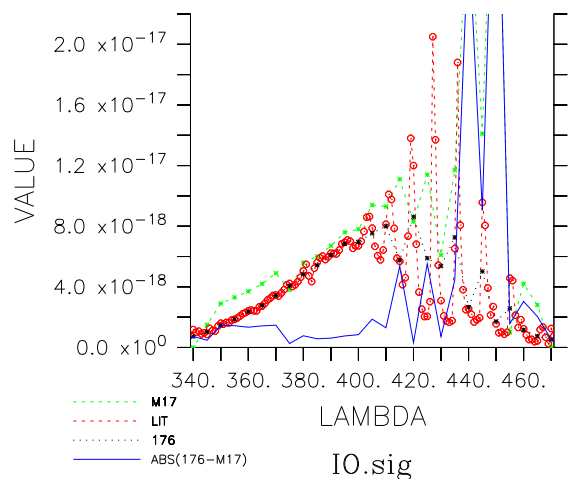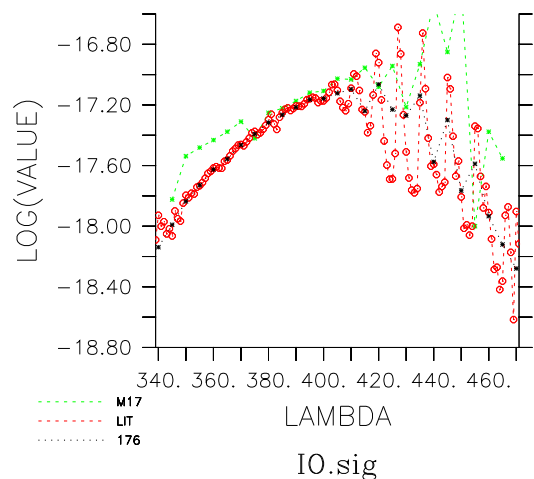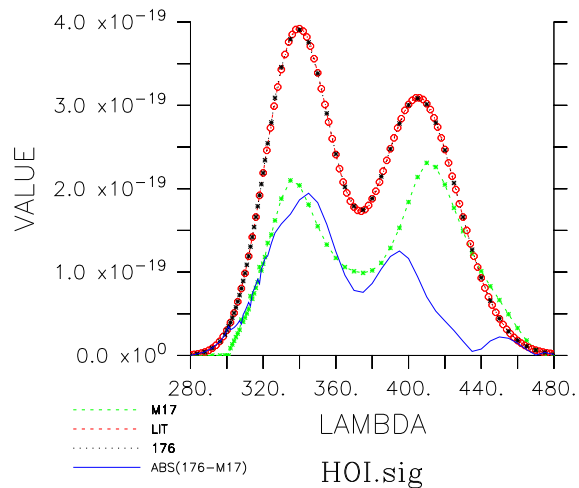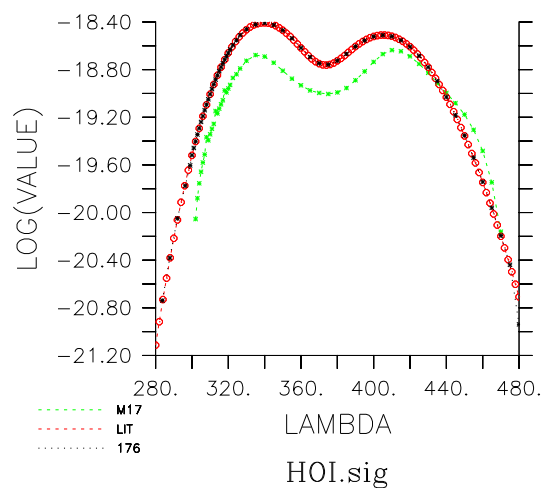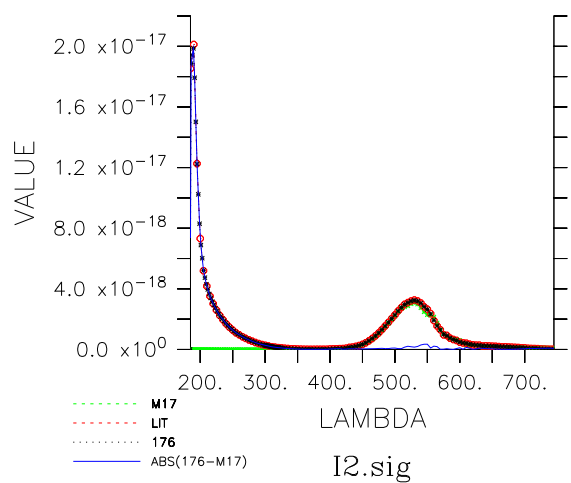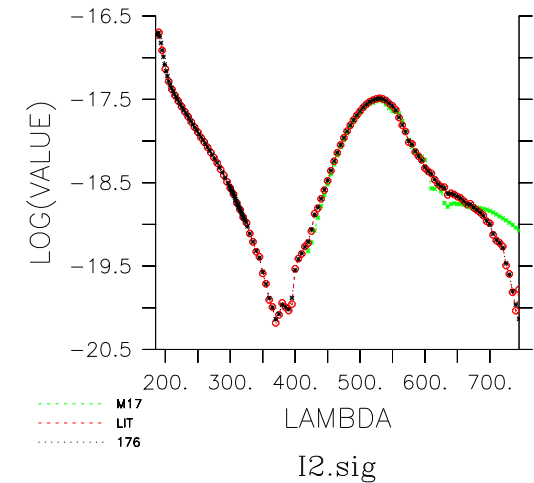

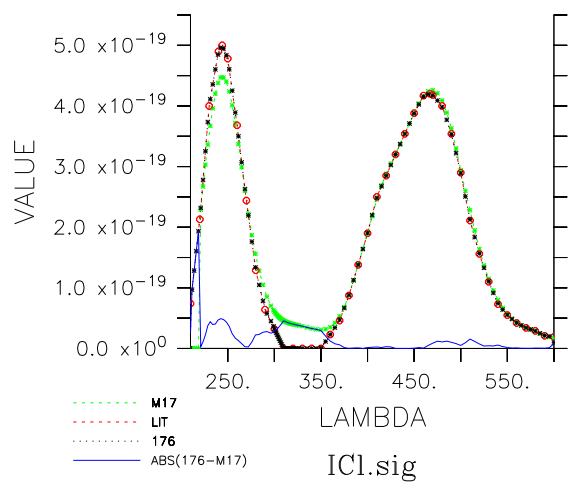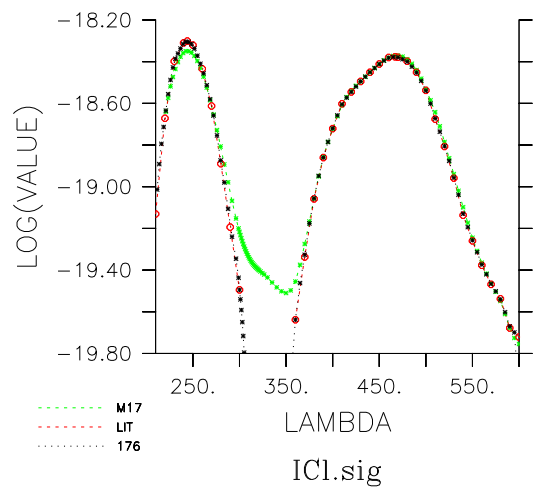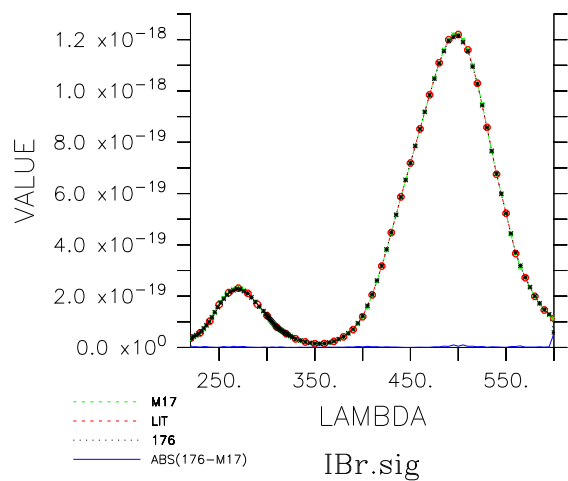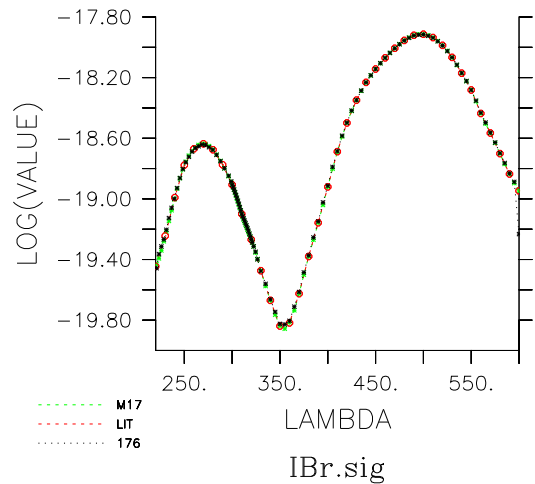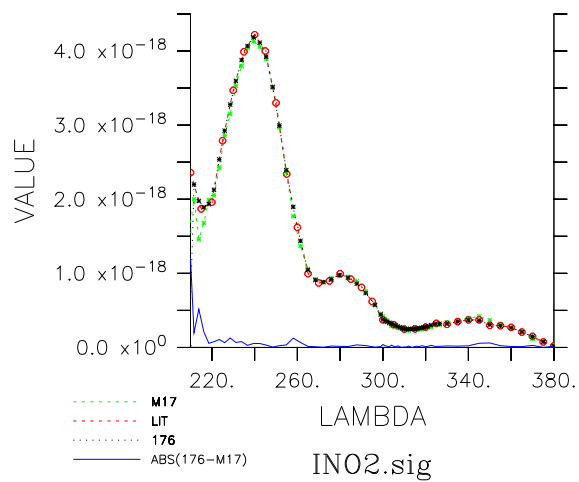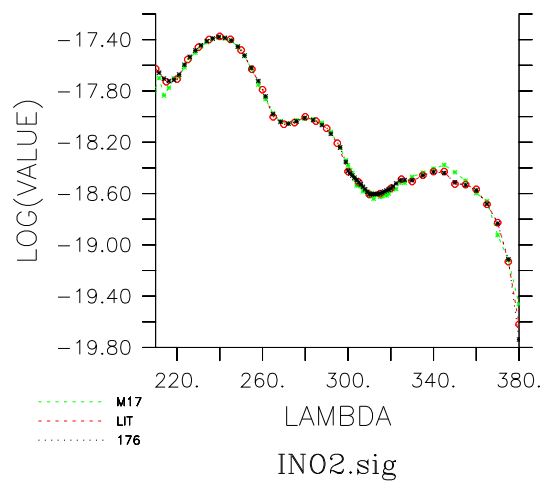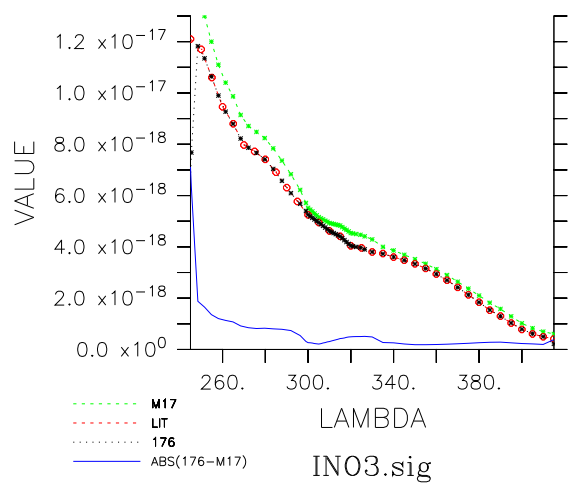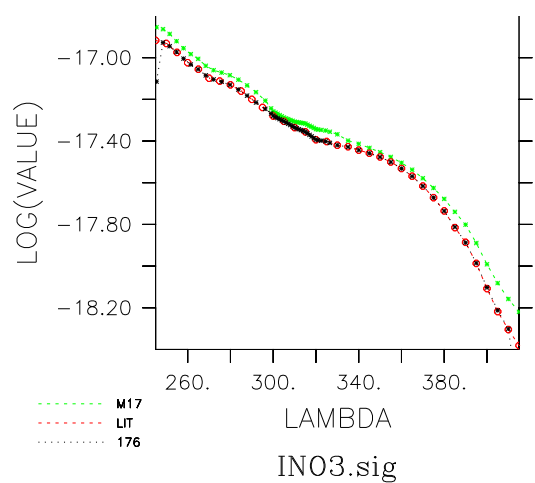

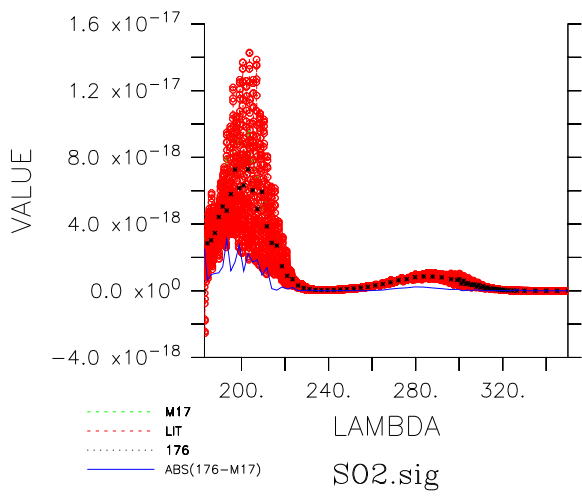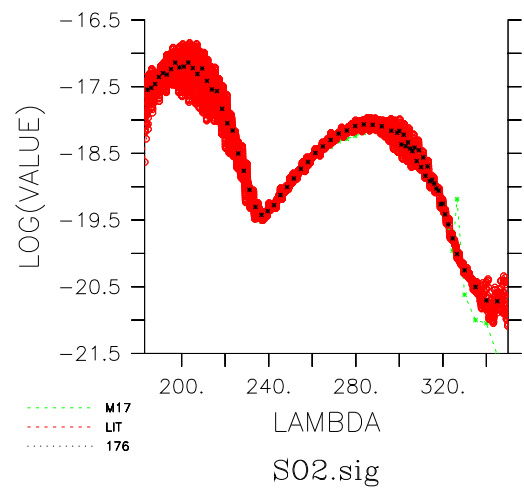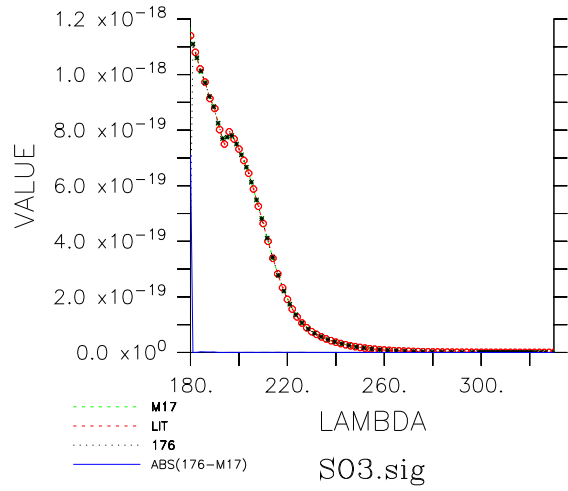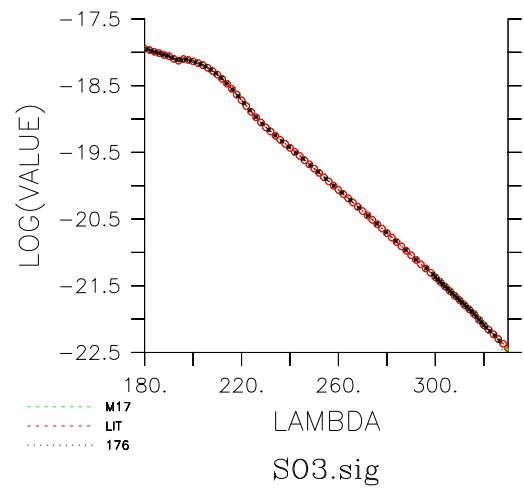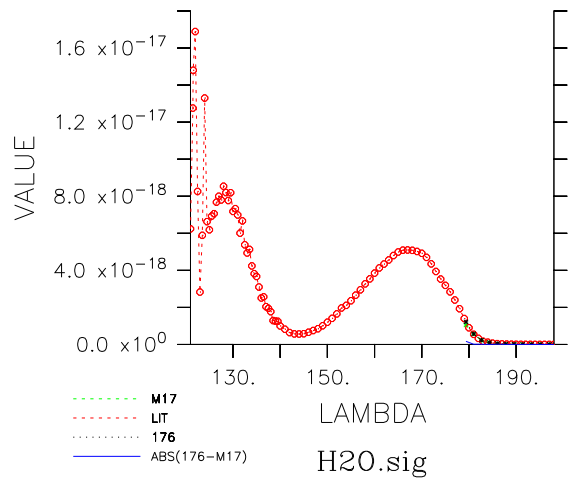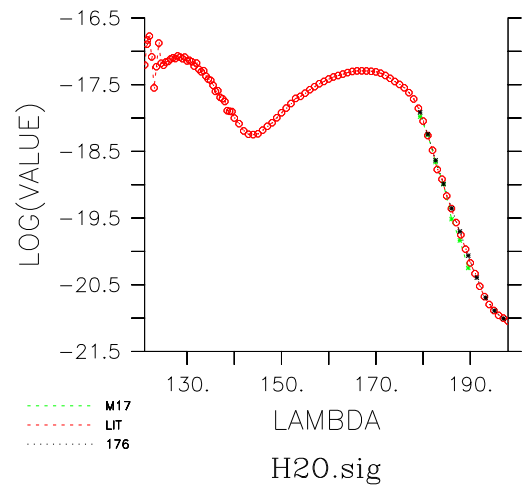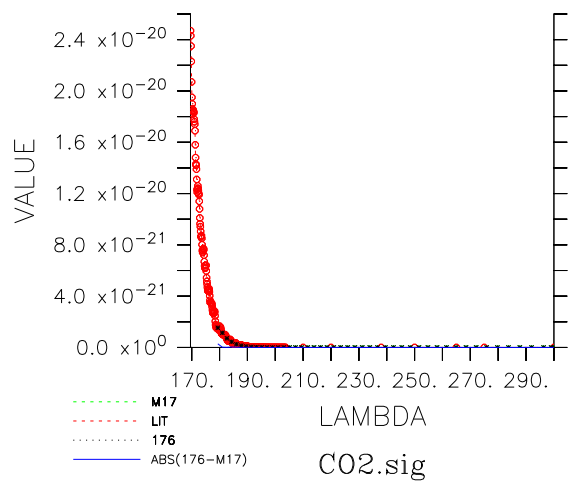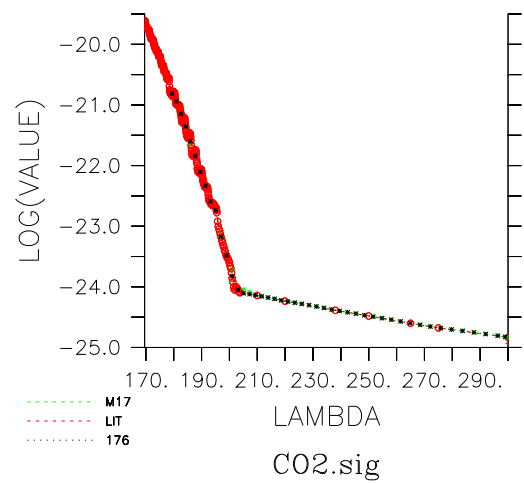

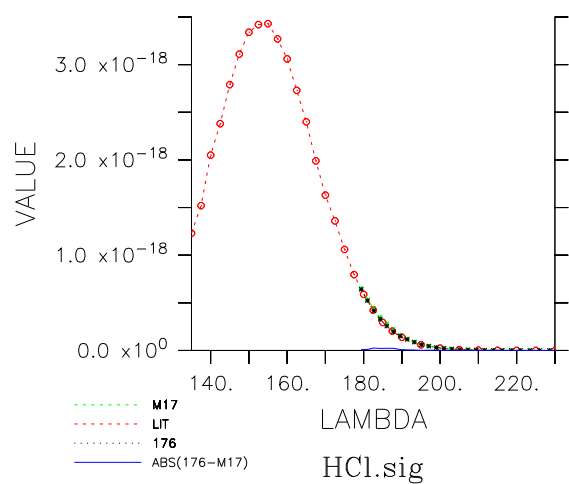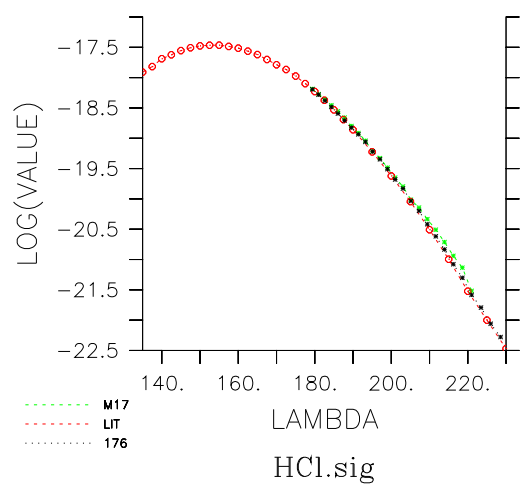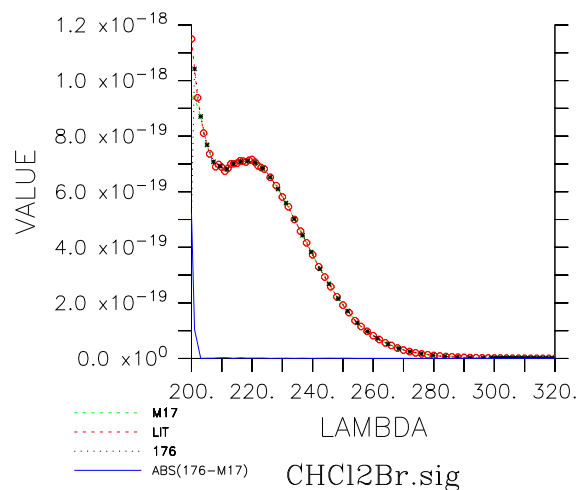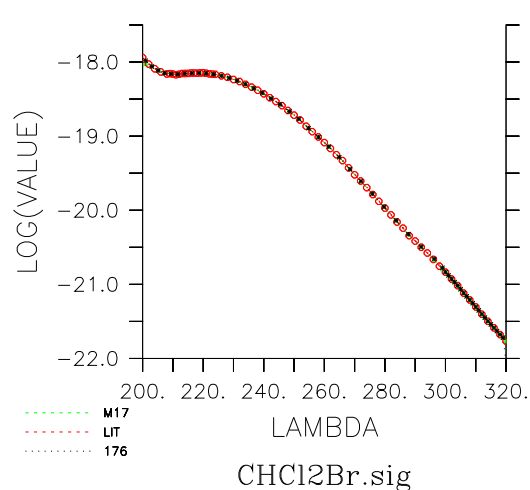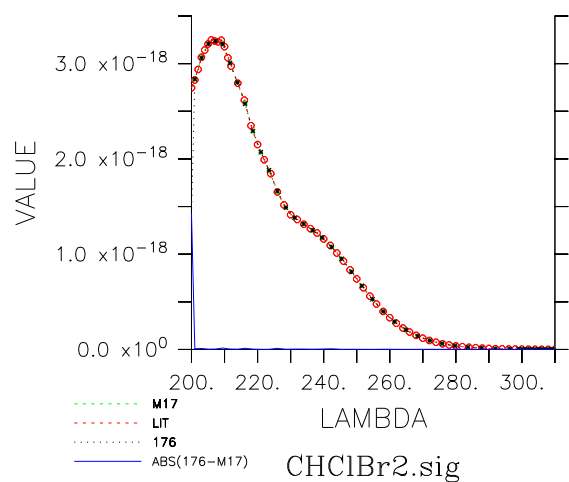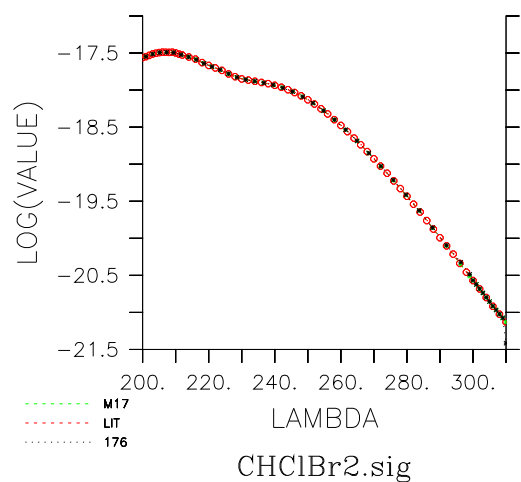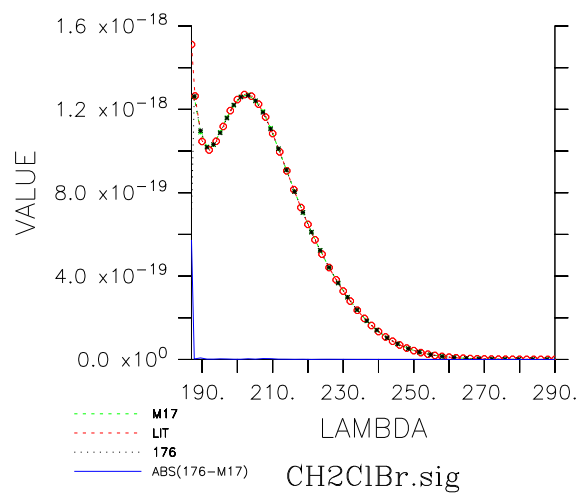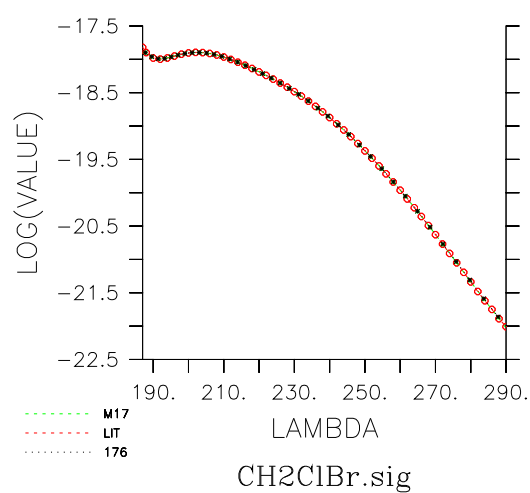

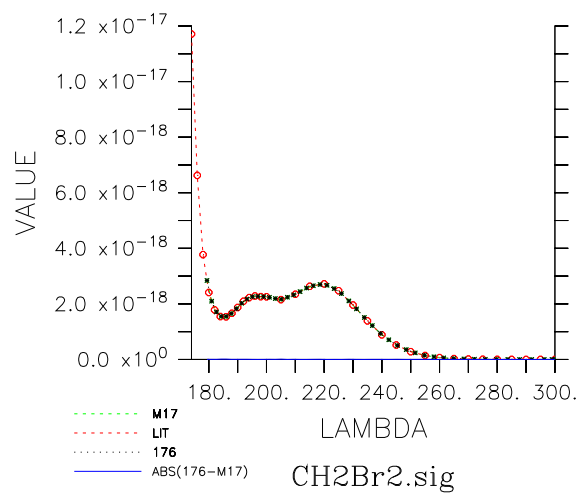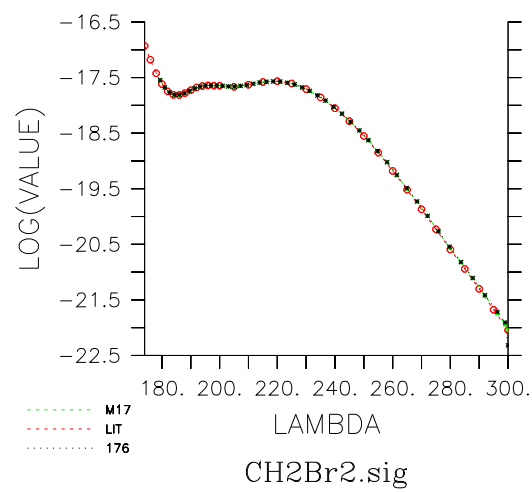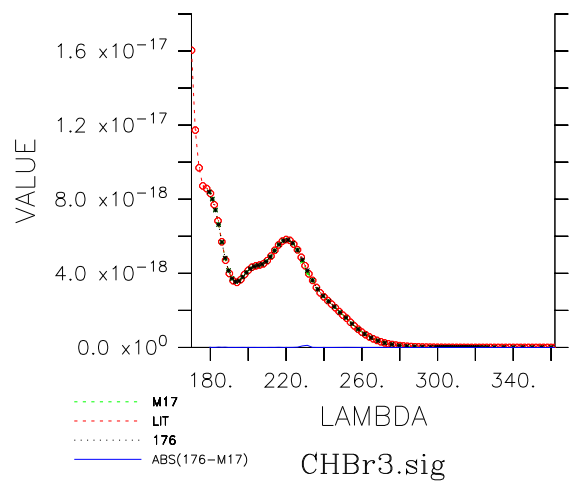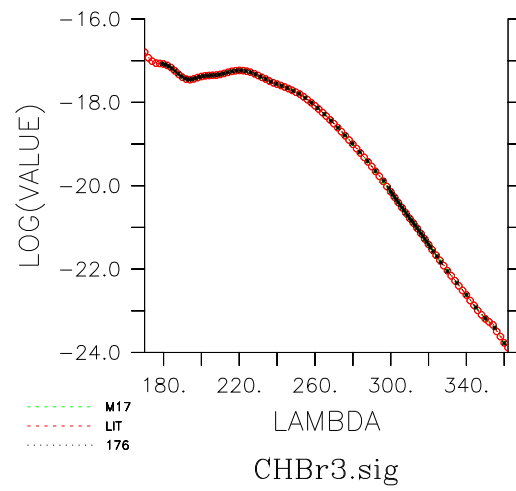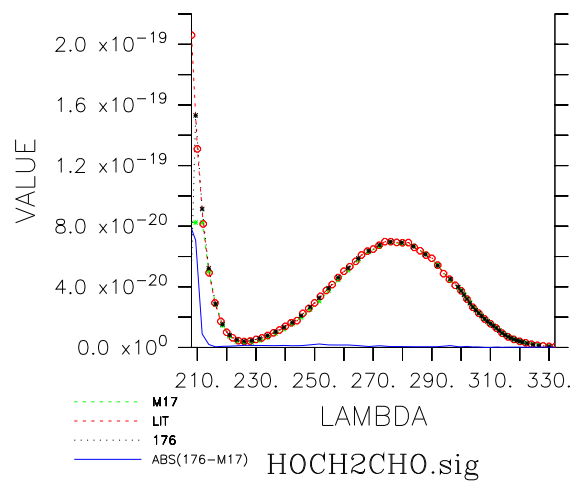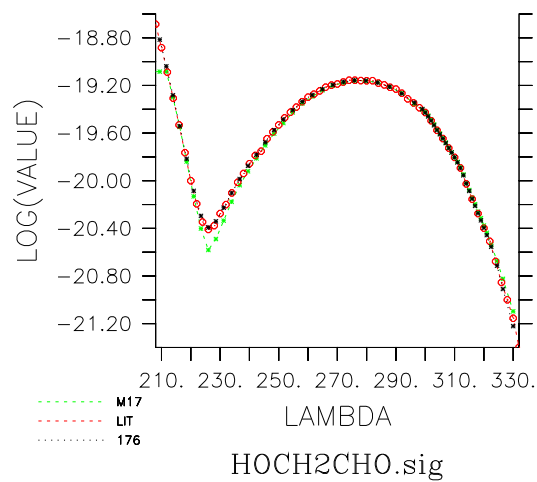

Supplement: Supplementary file 6 [file gmd-7-2653-2014-supplement.zip]

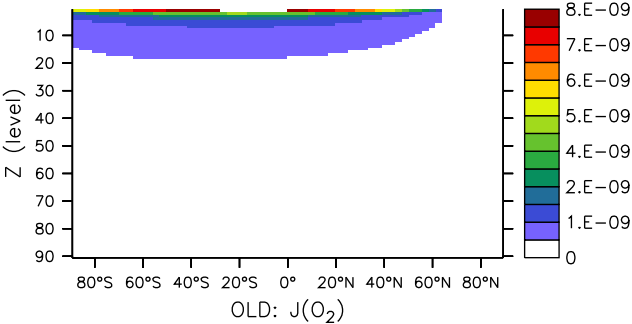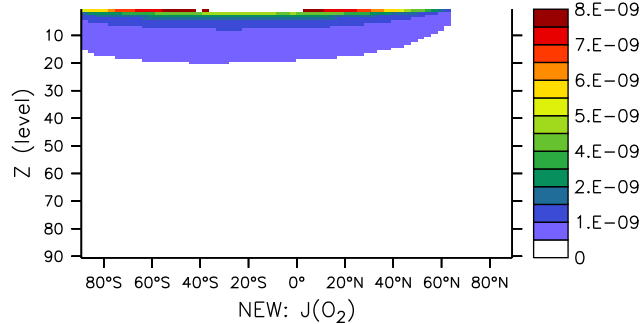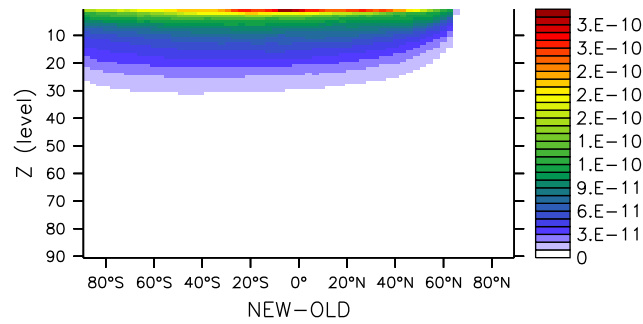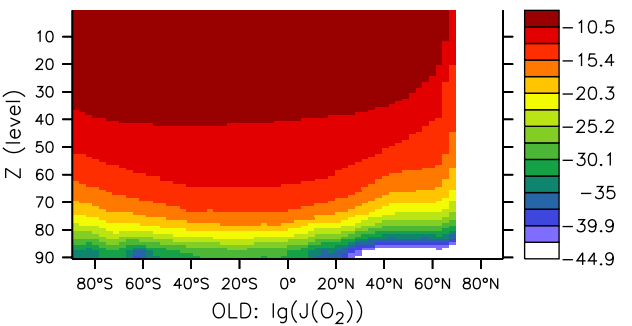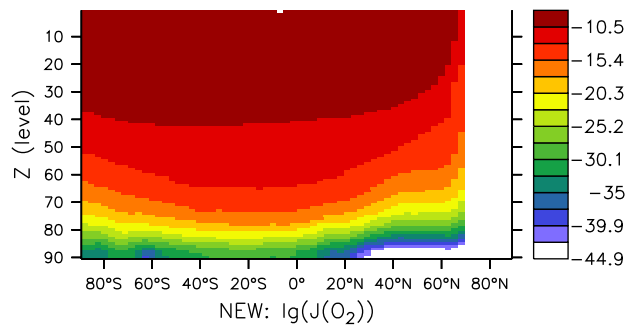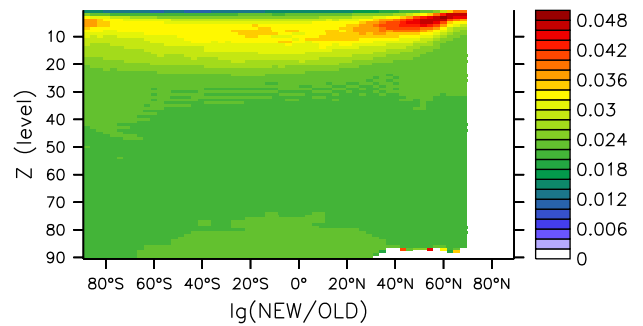

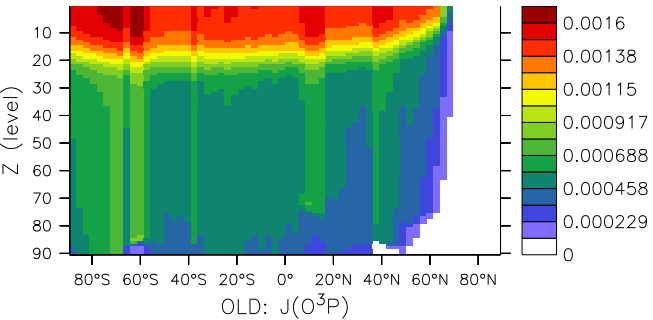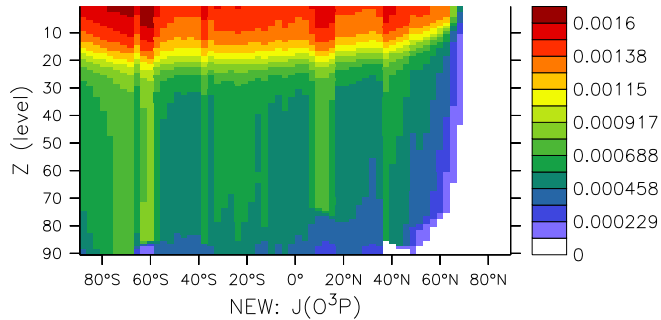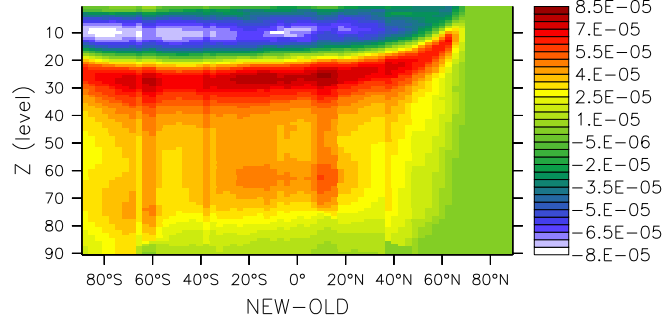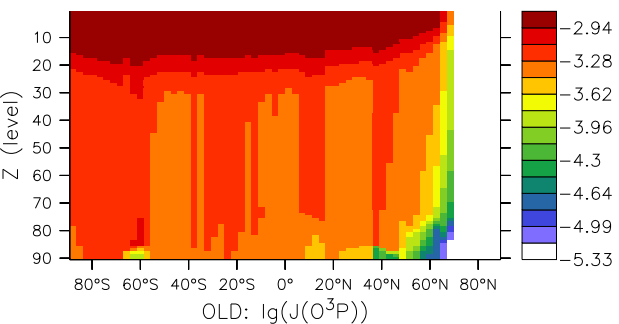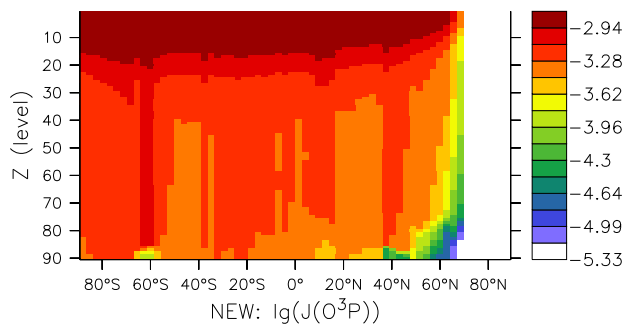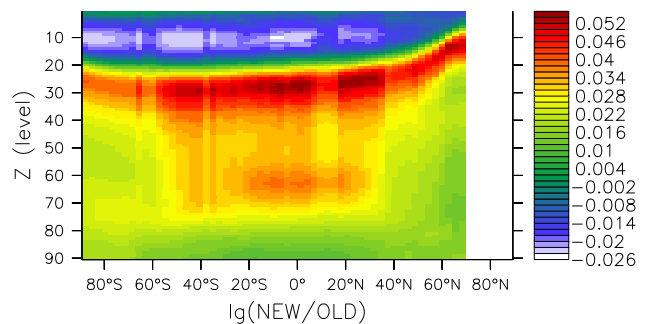

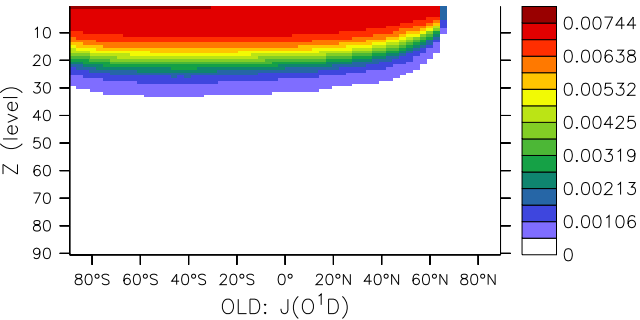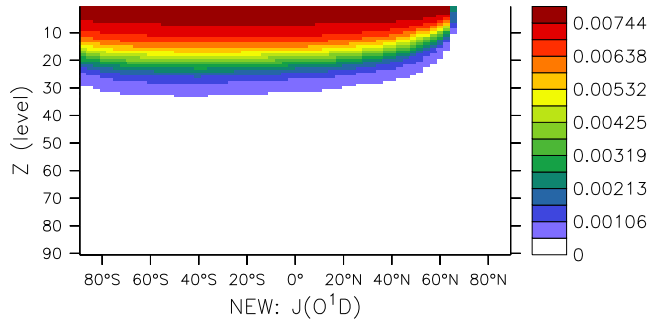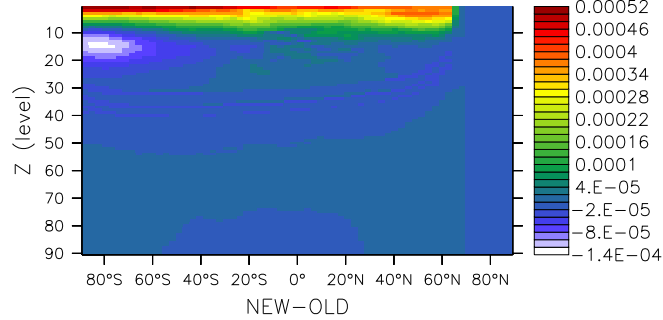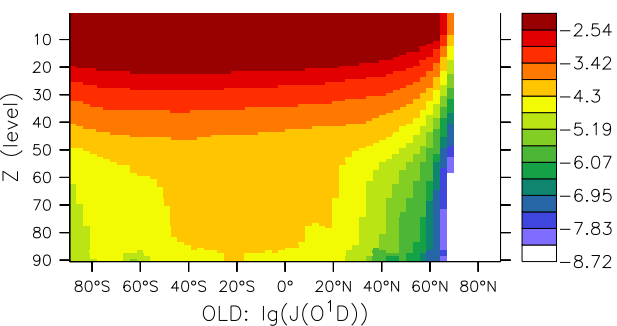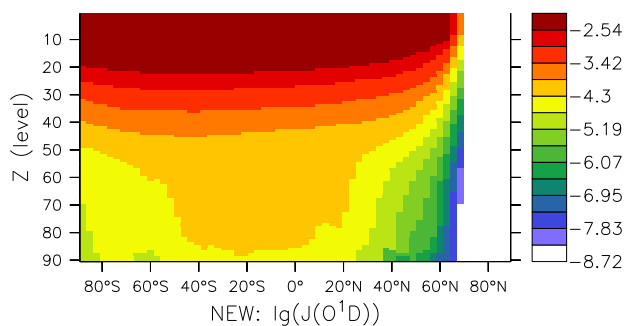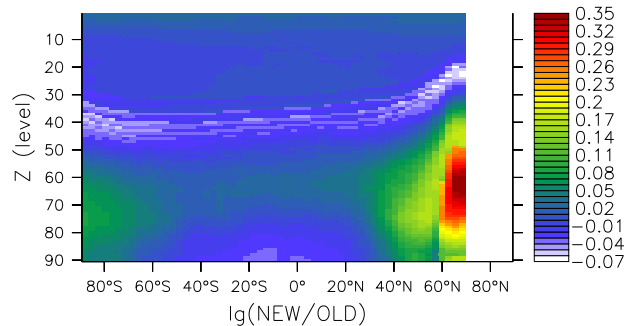

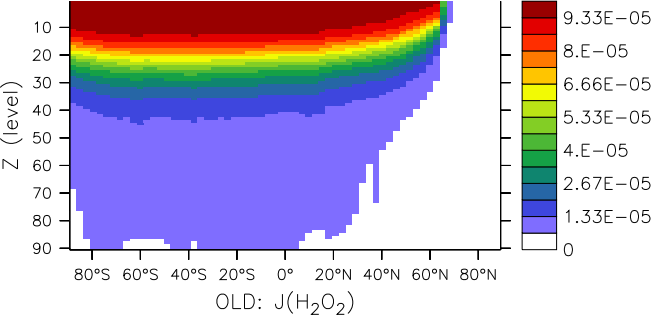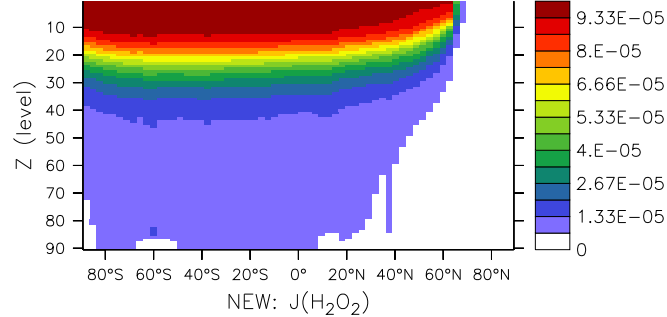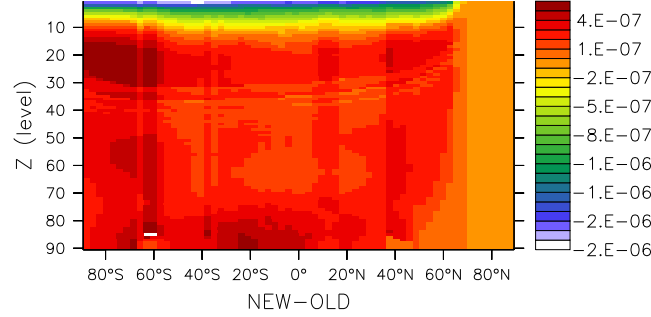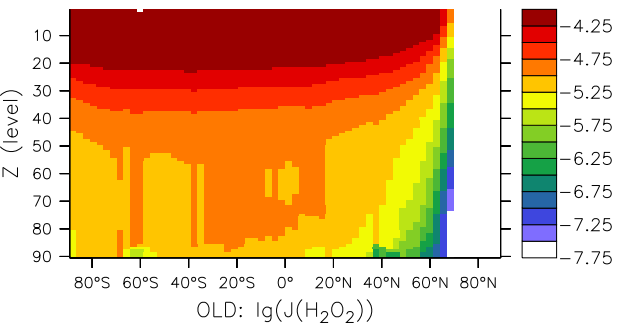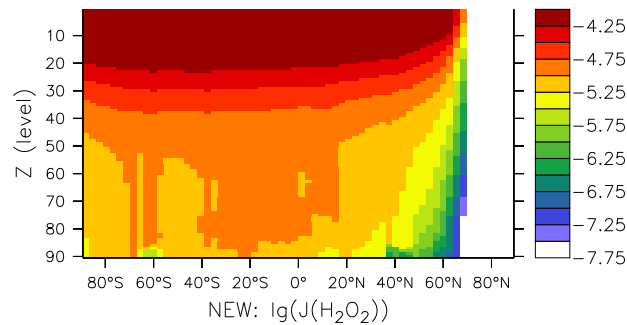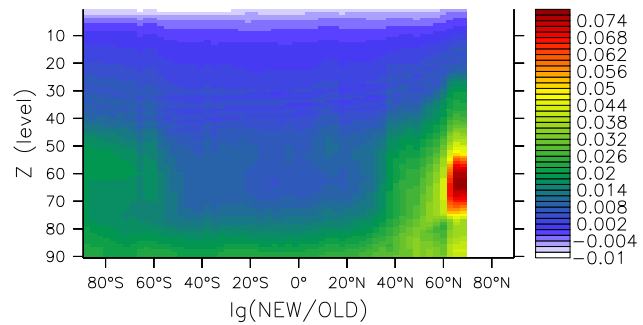

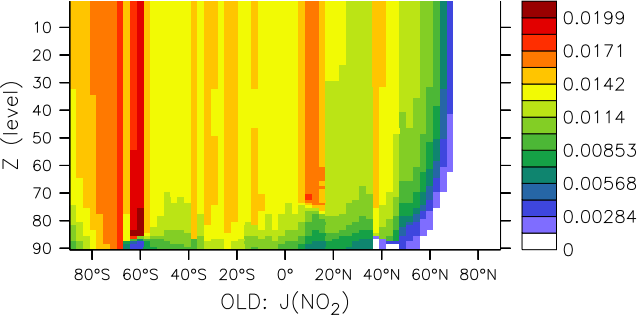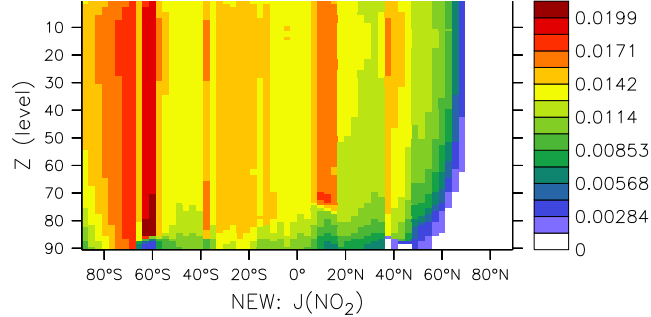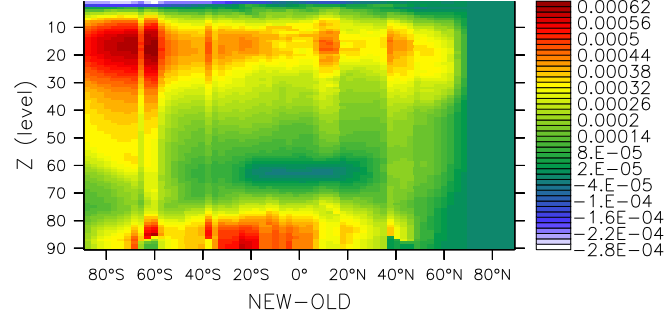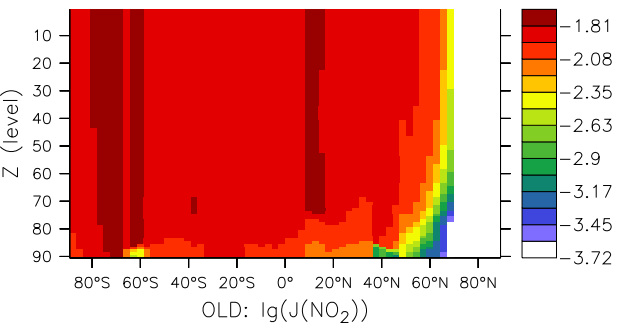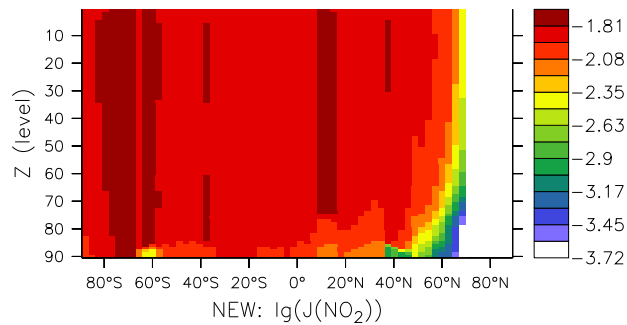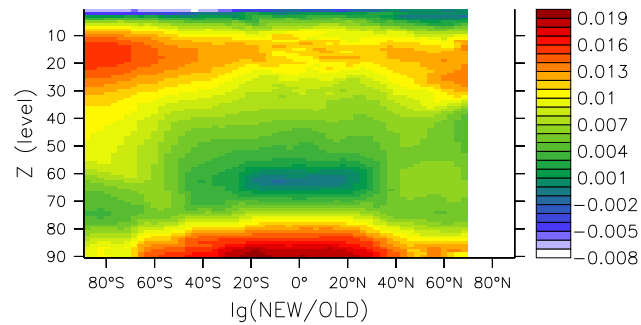

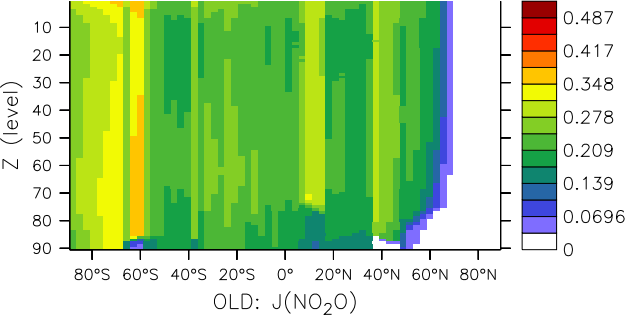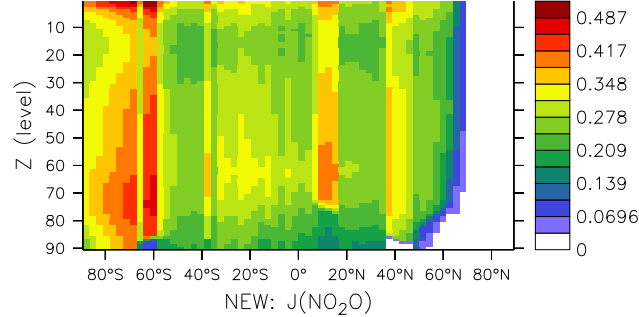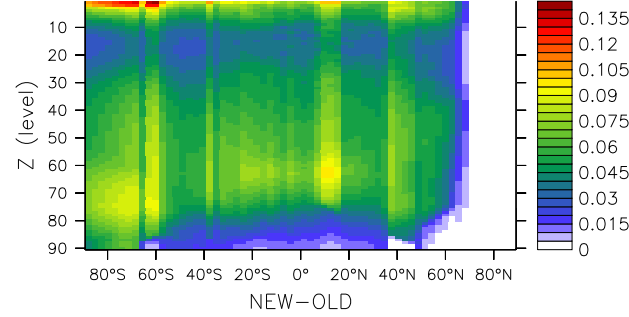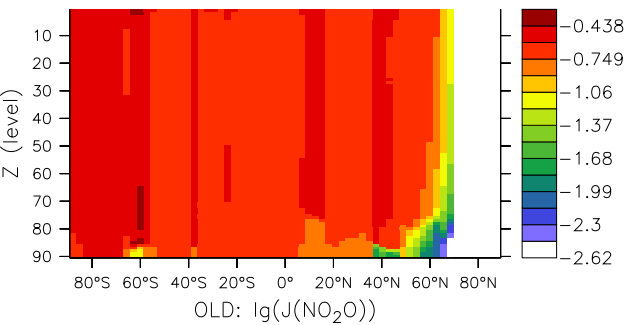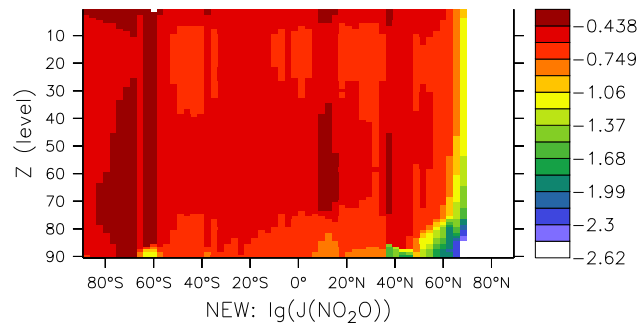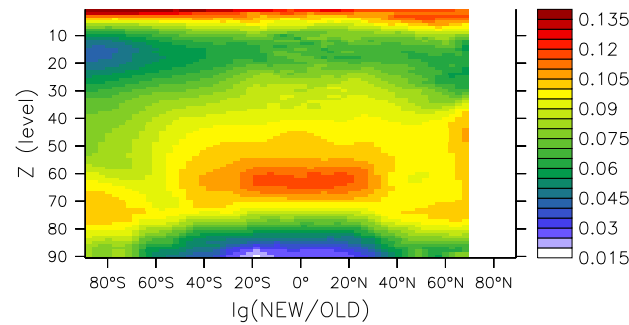

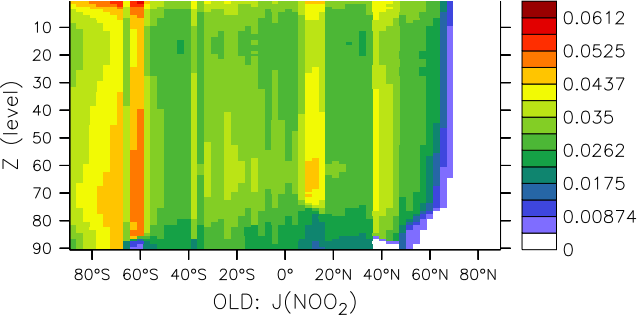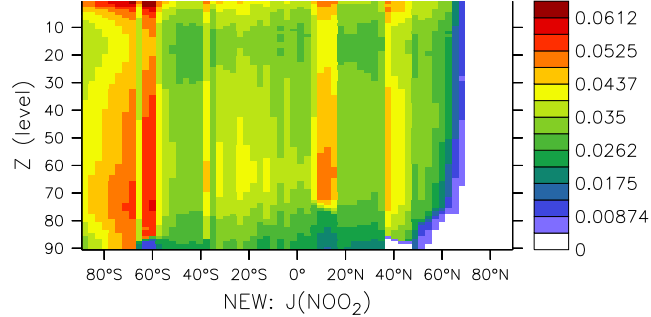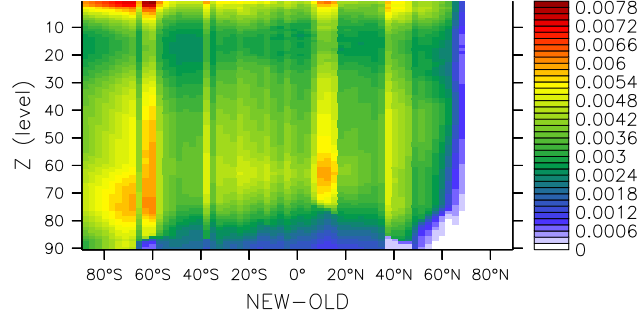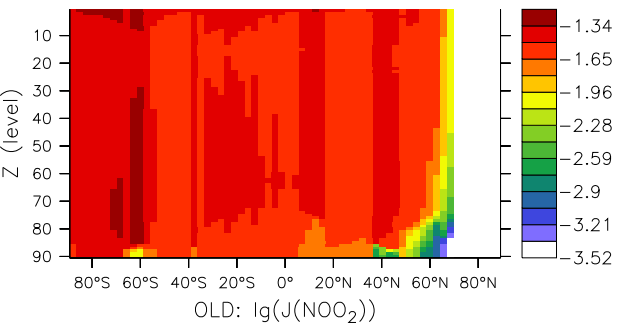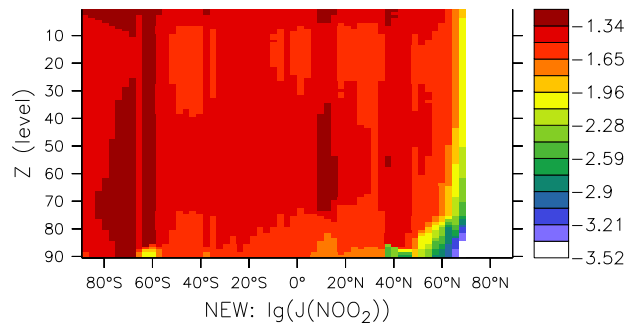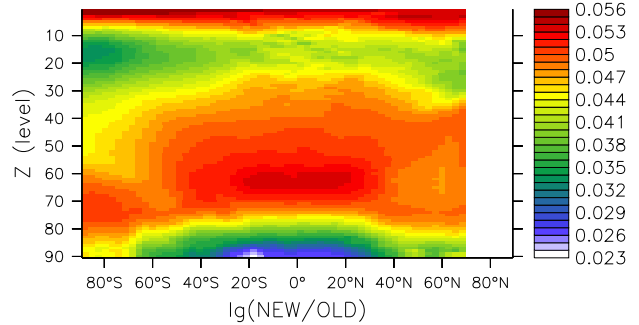

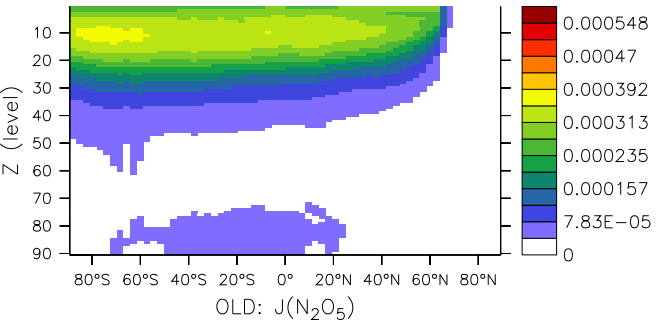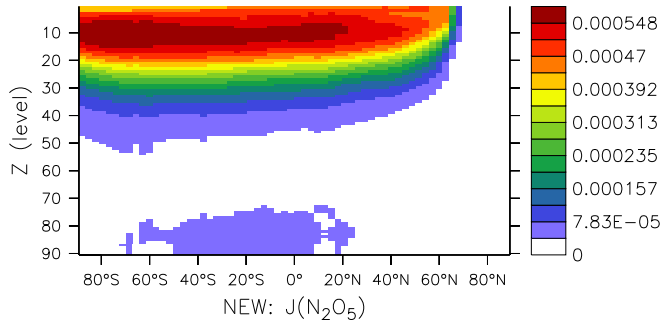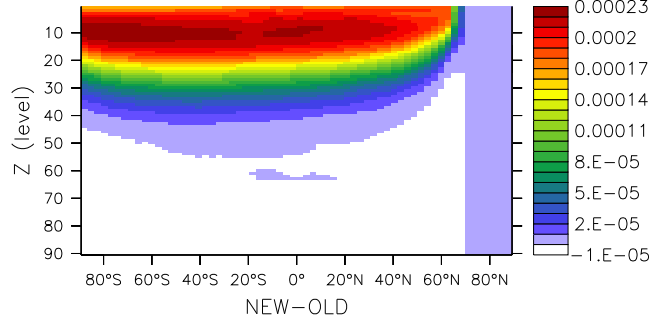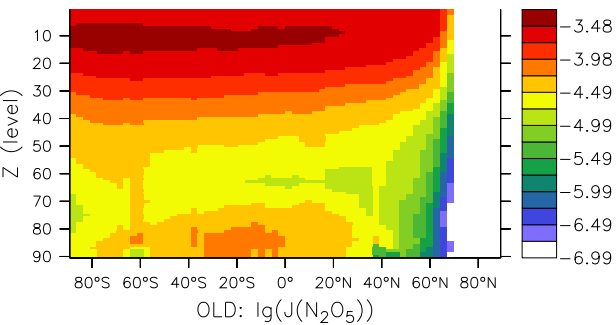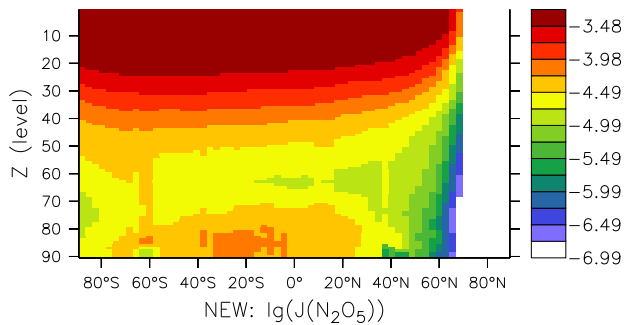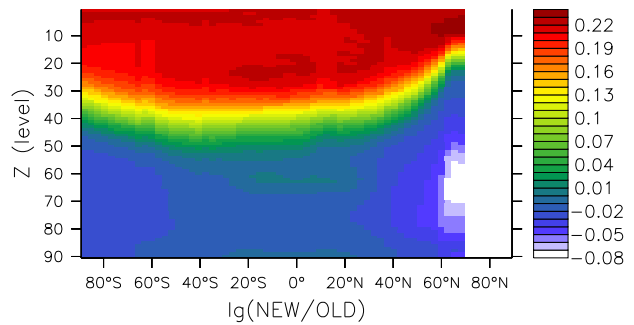



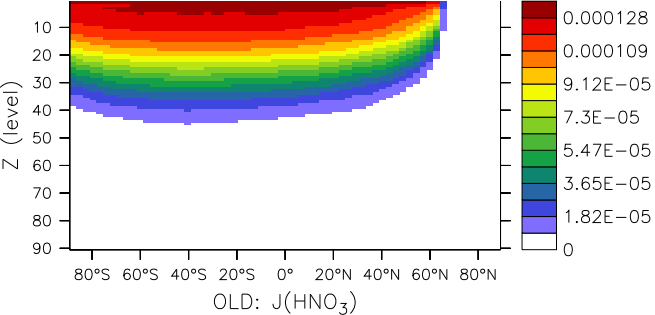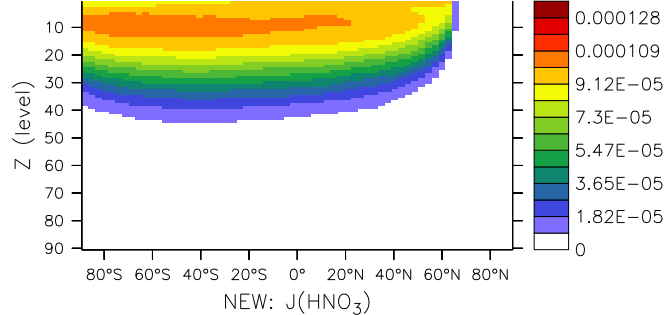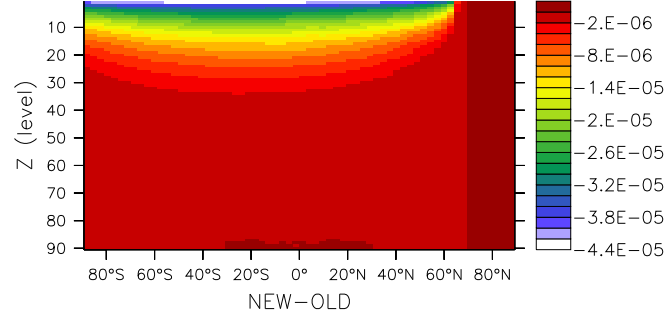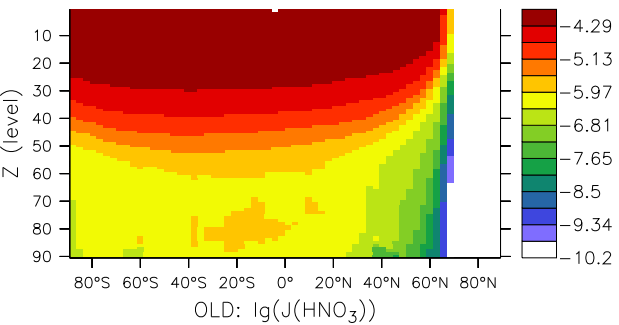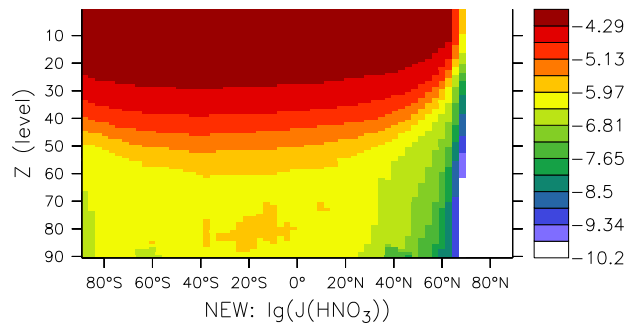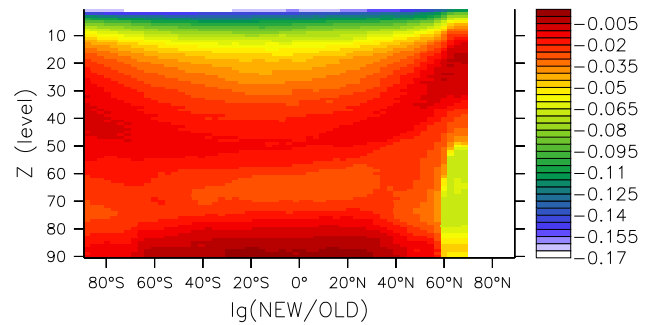

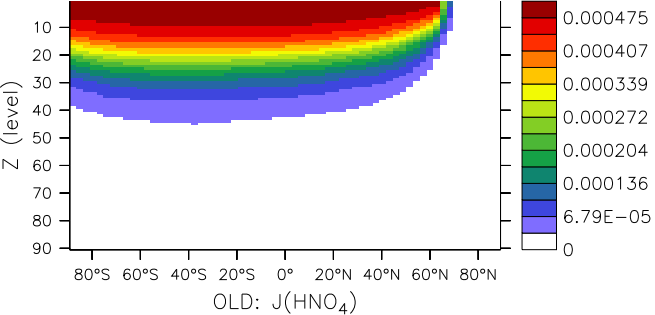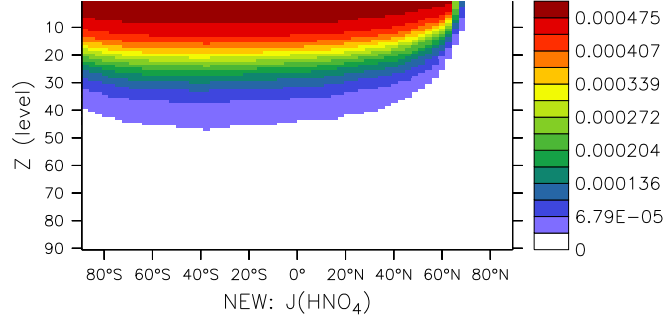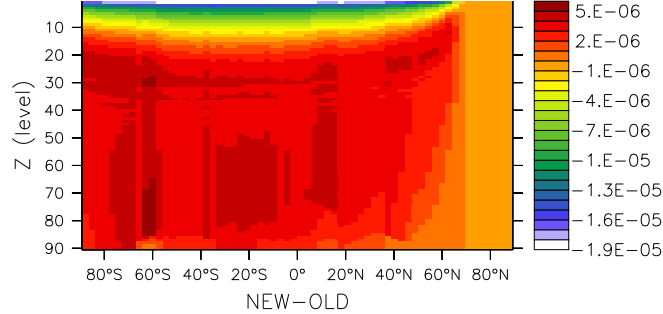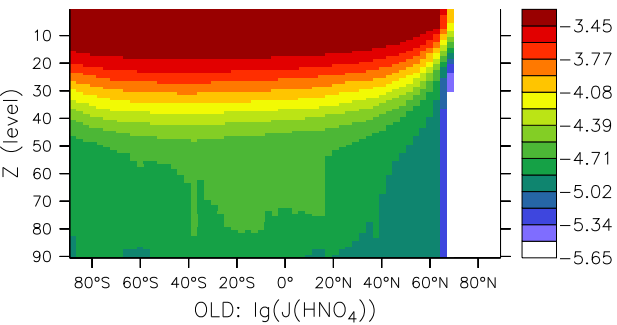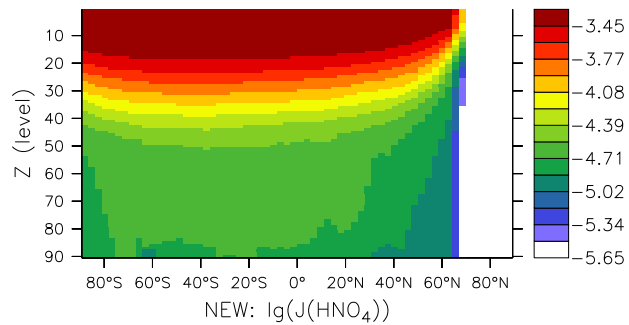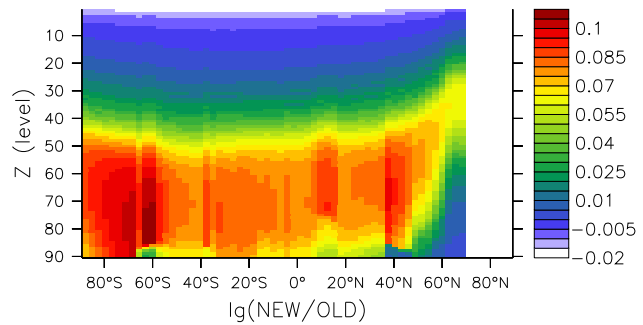

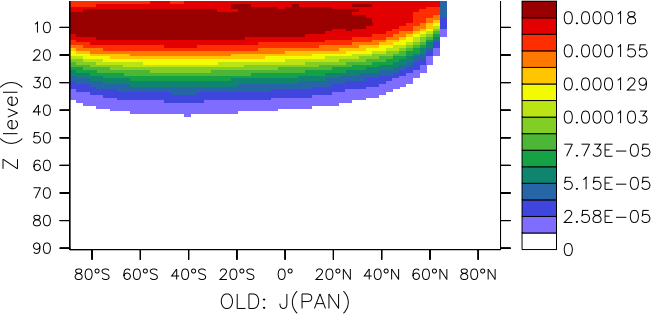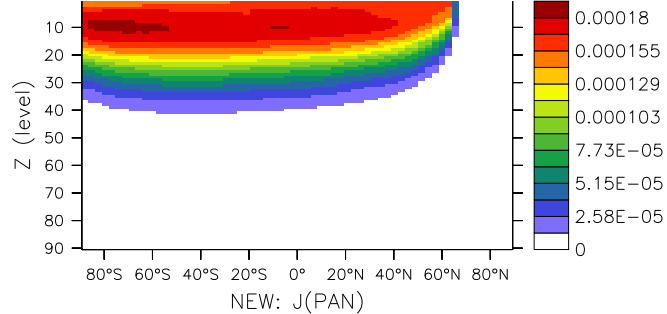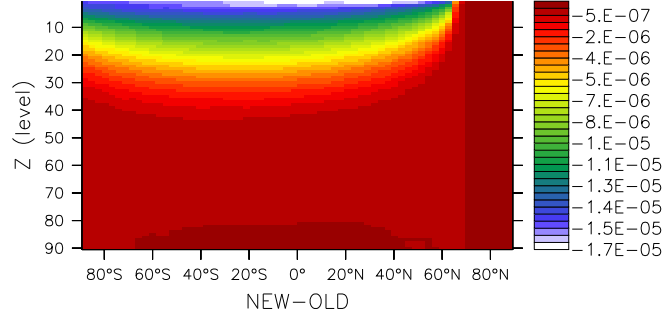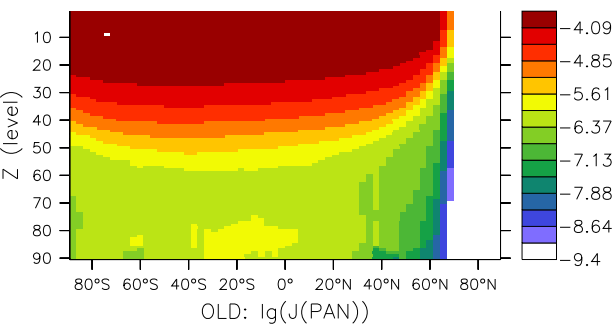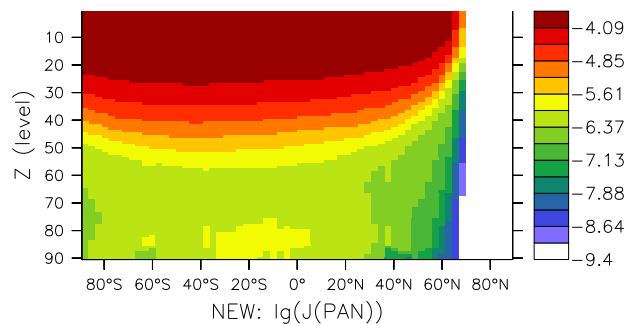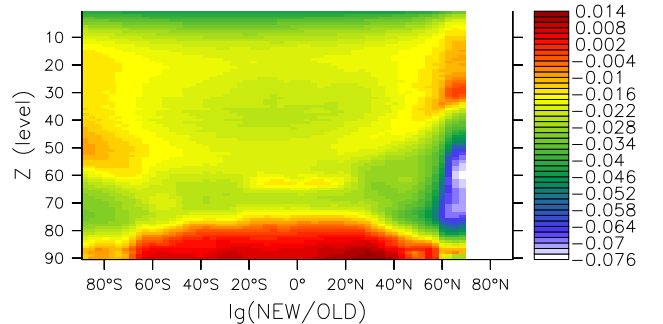

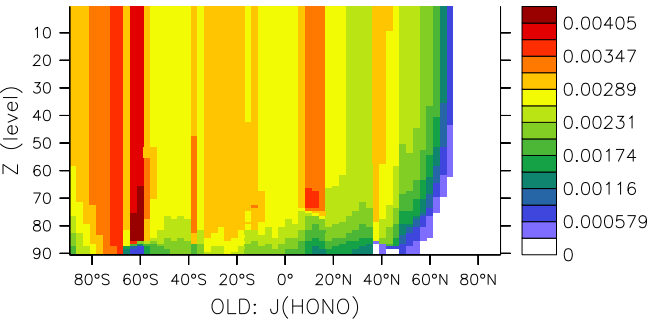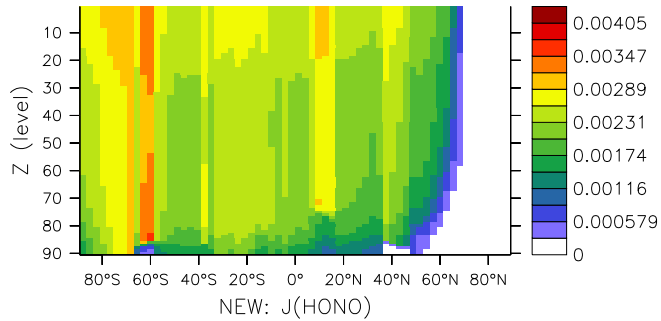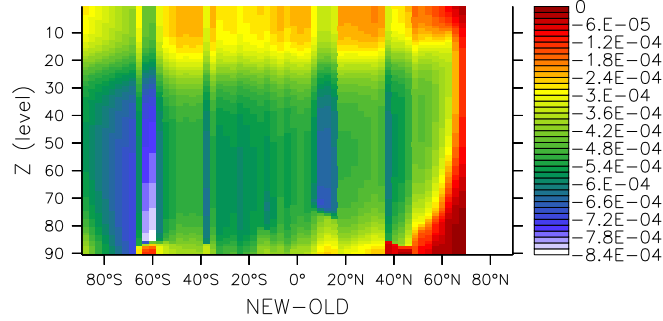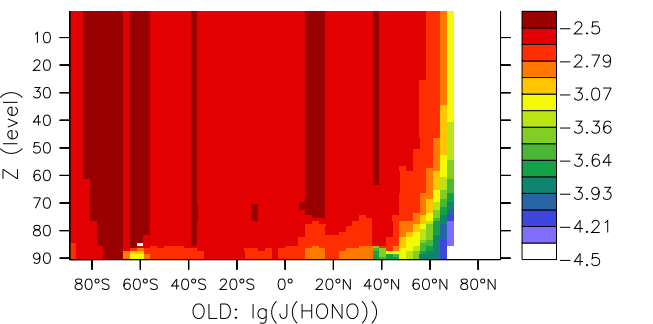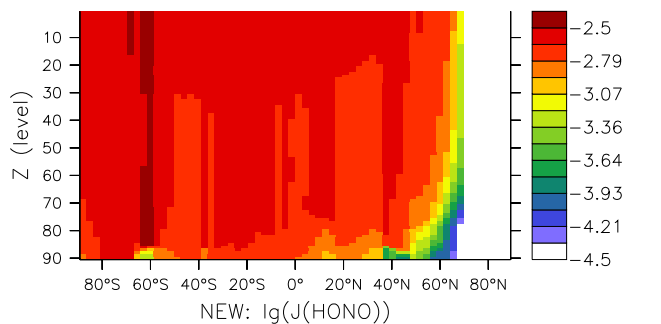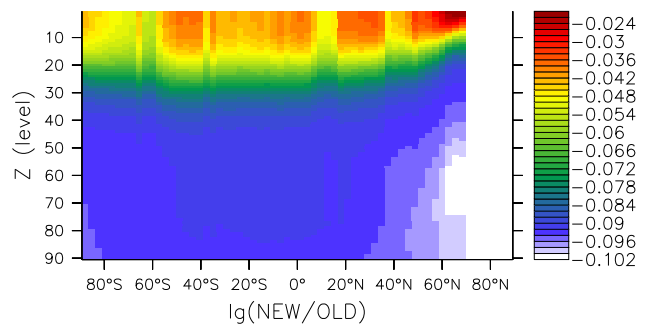

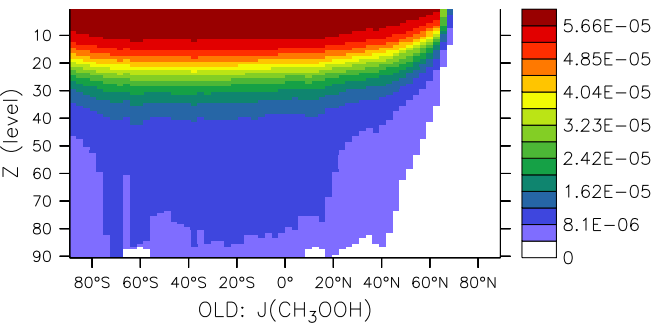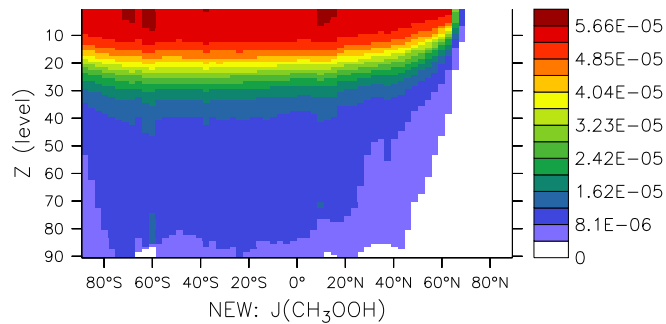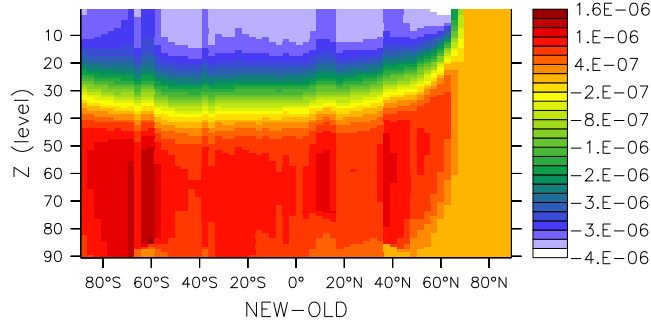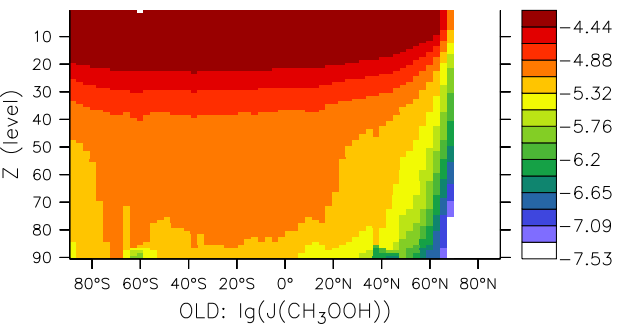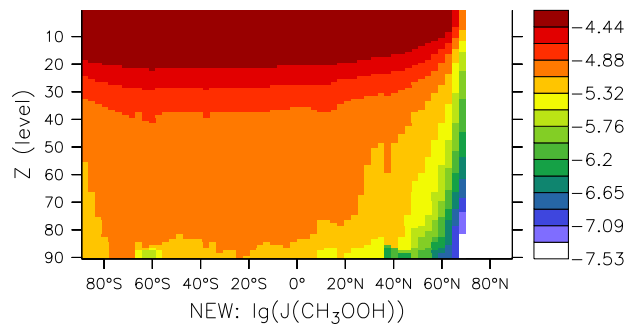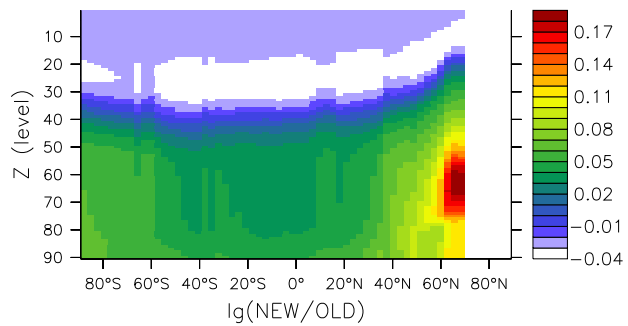

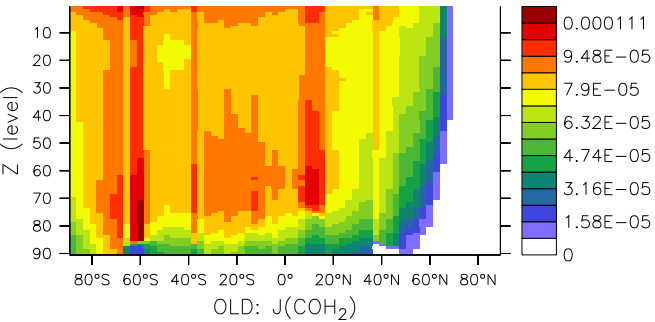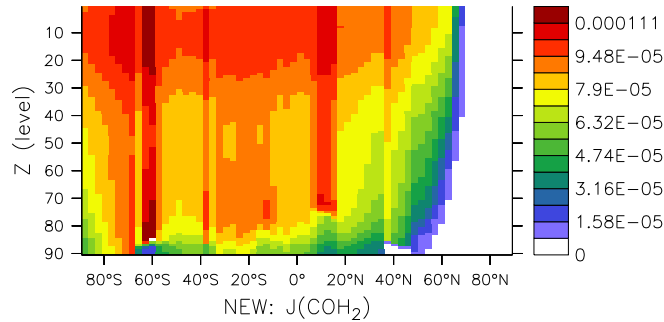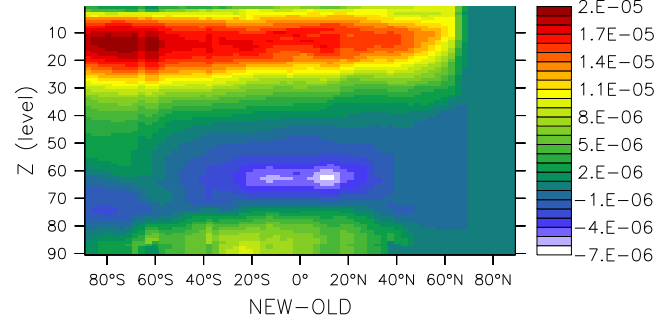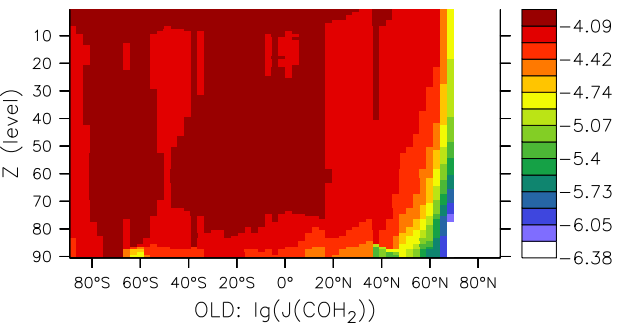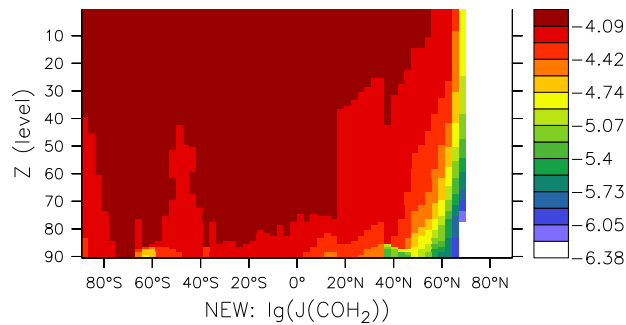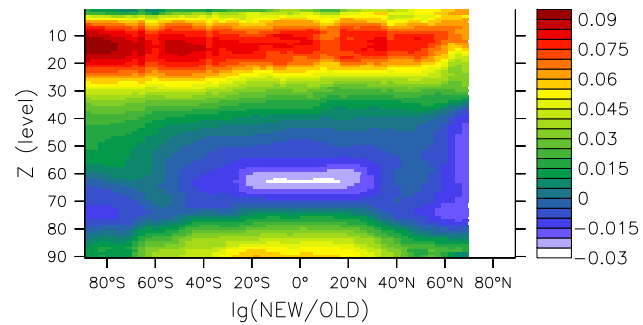

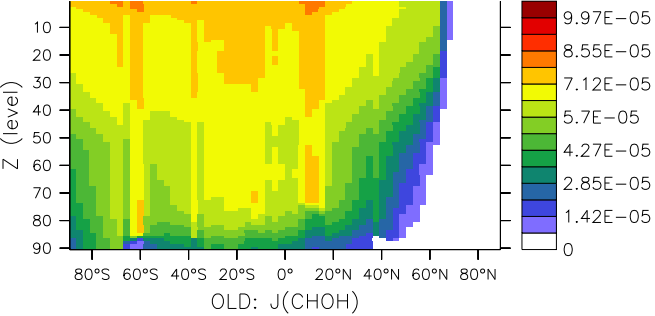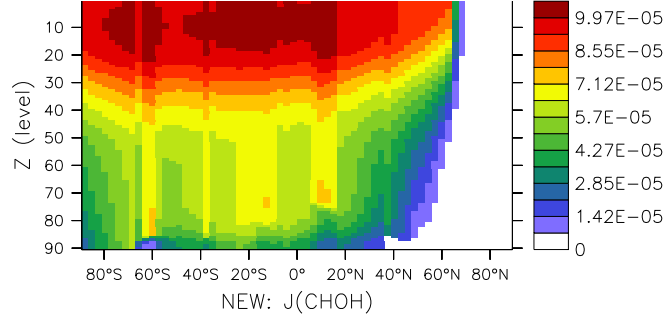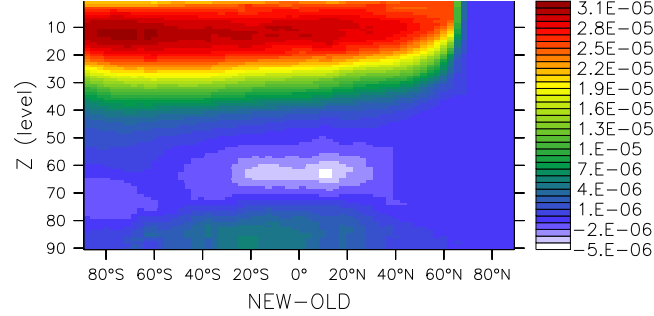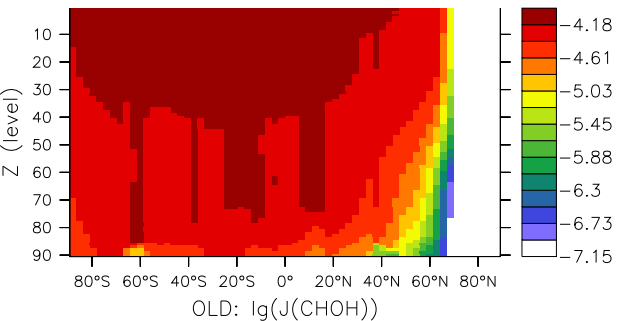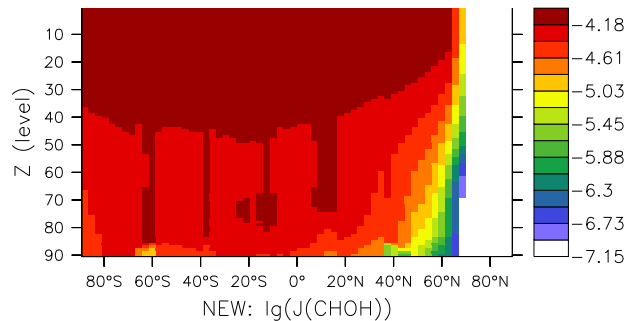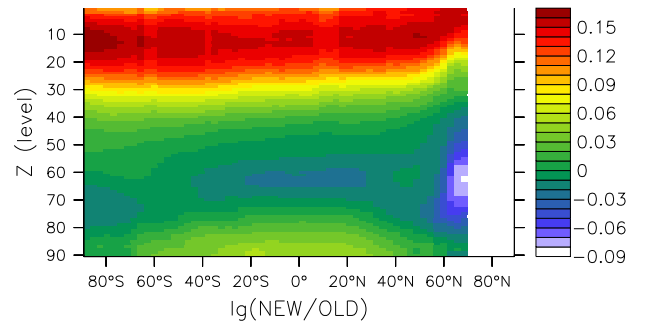

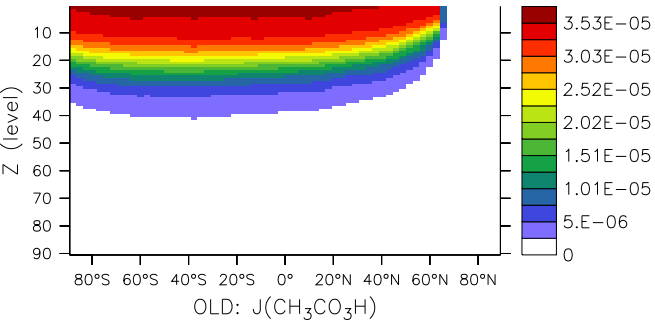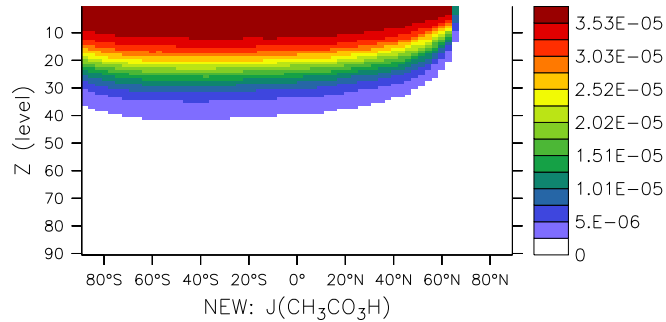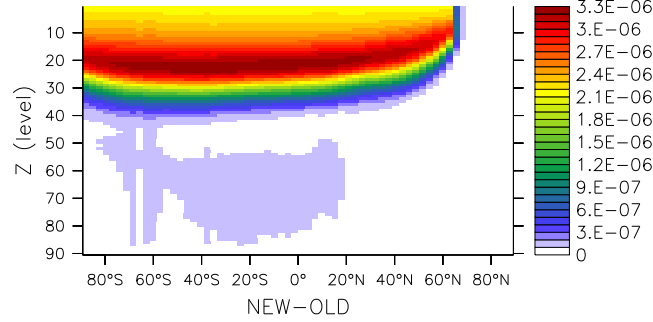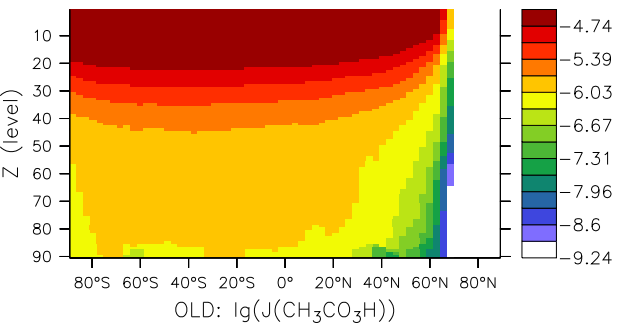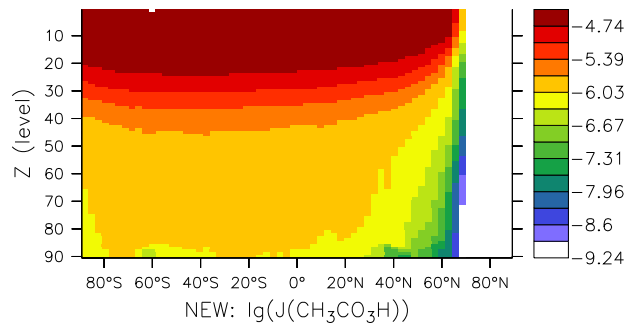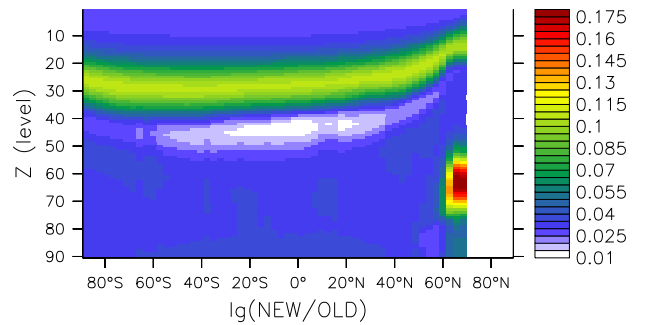



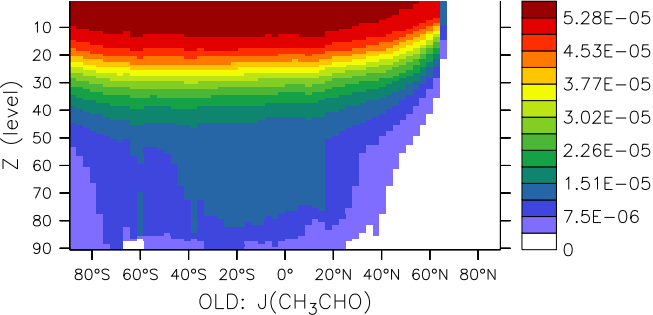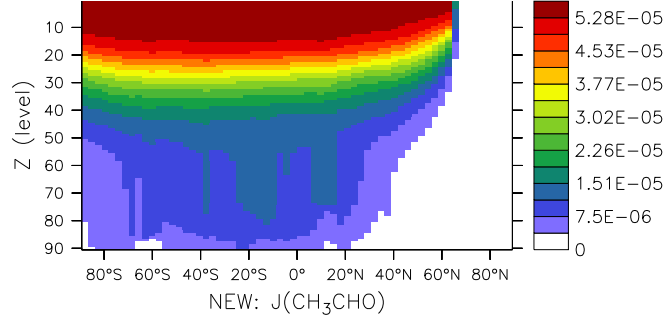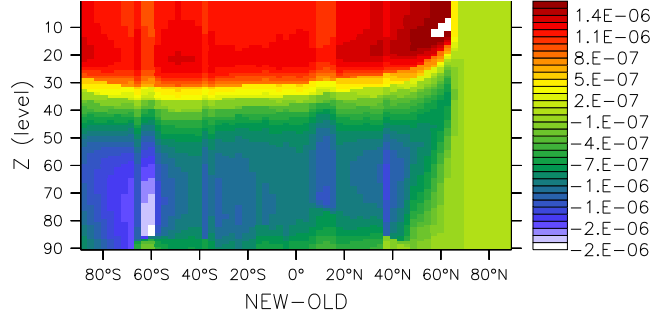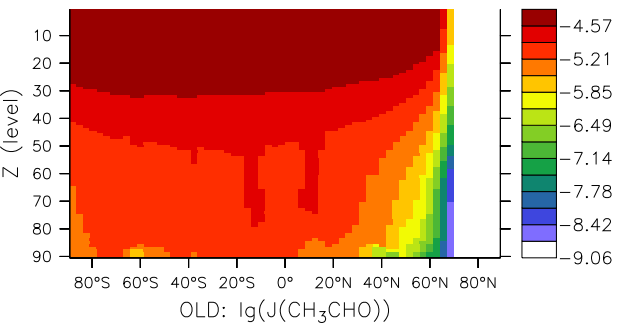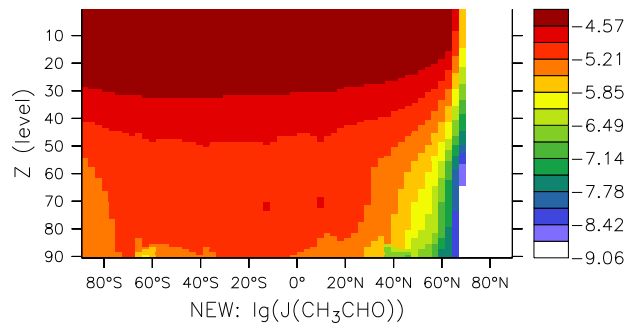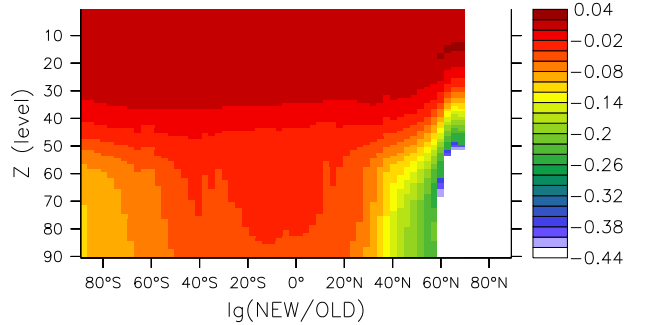

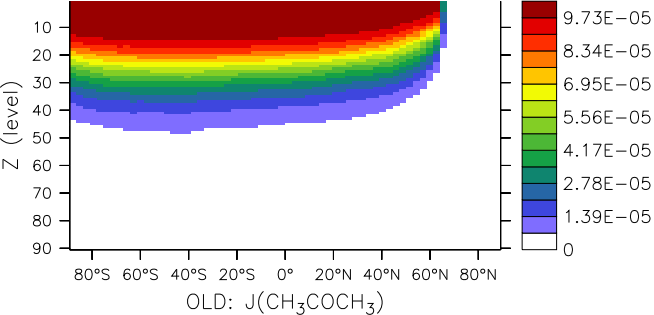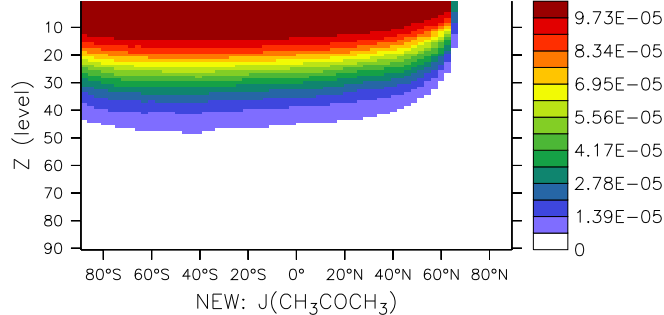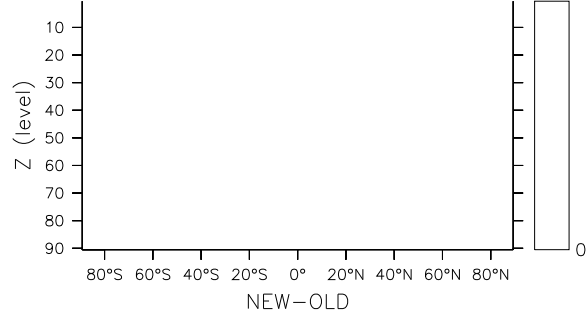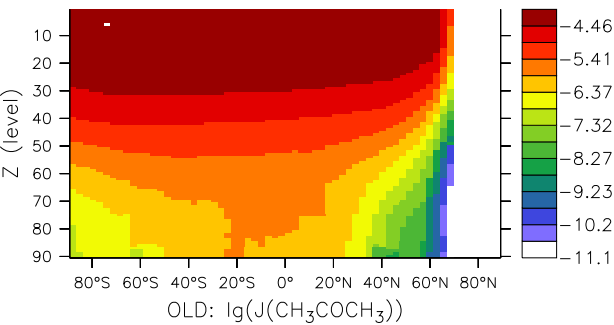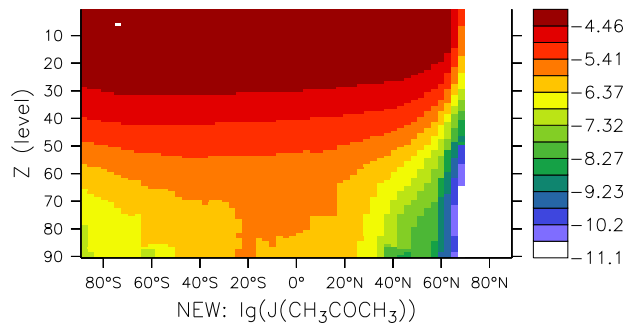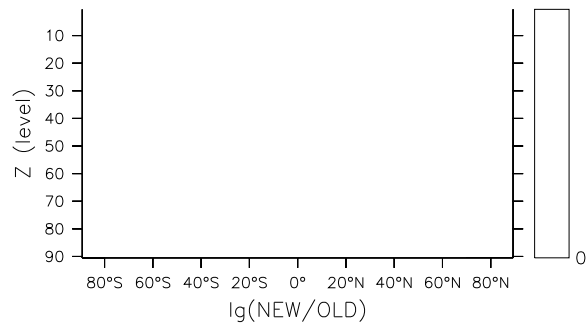

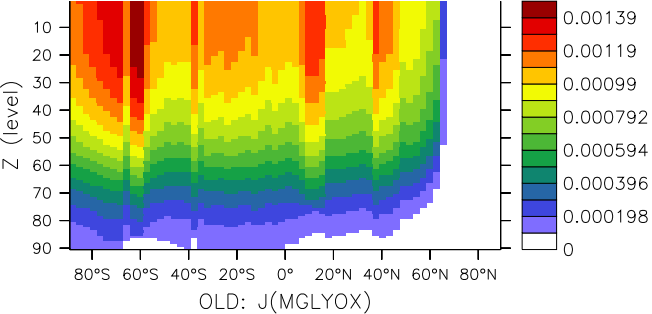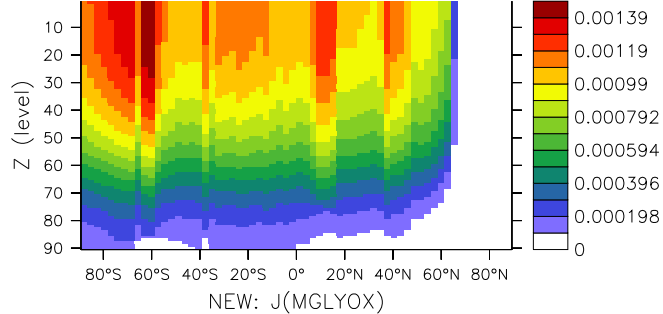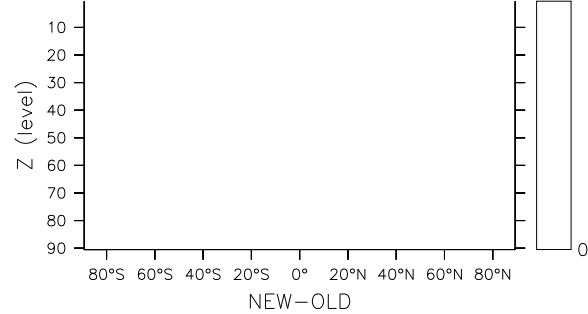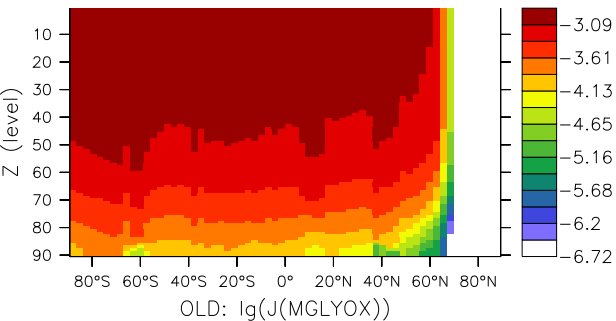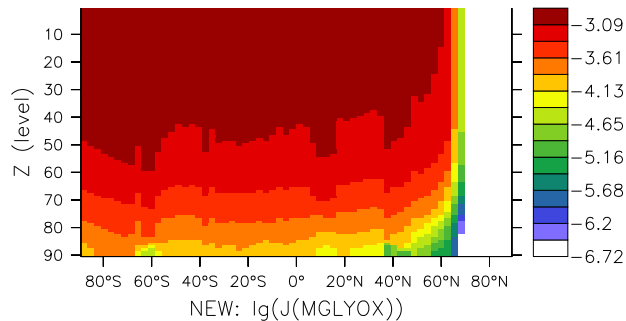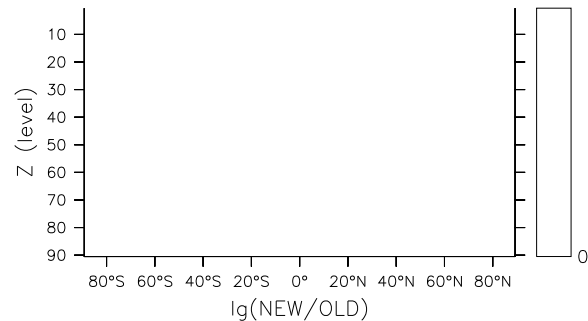

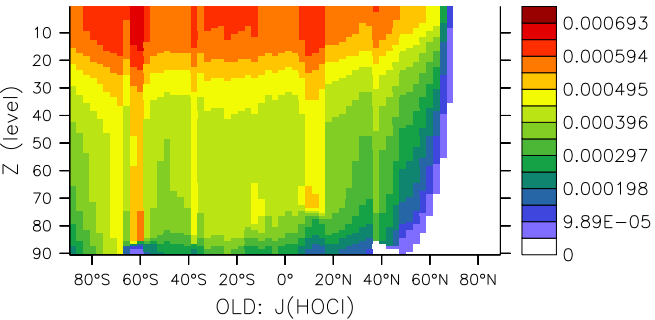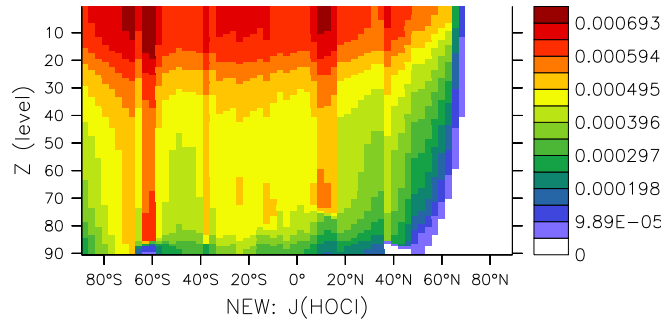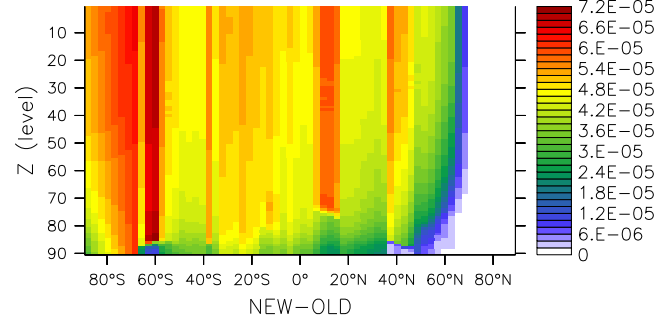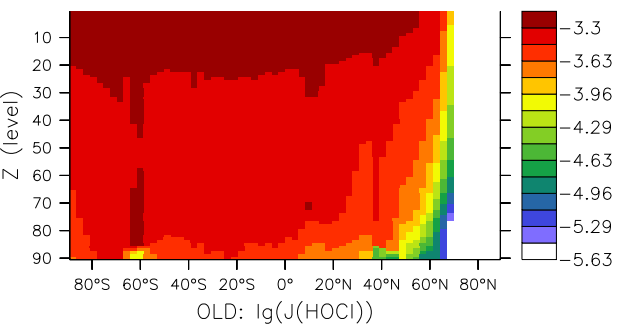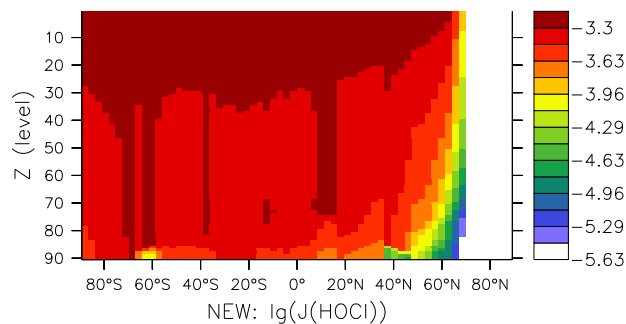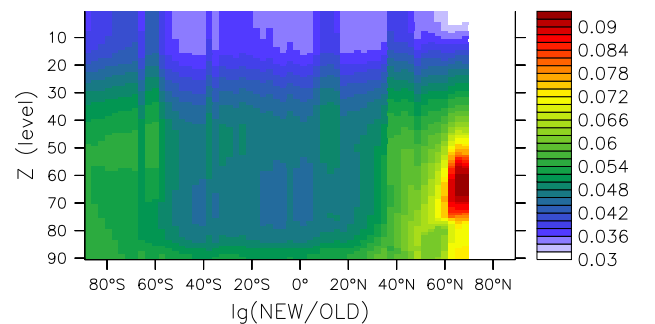

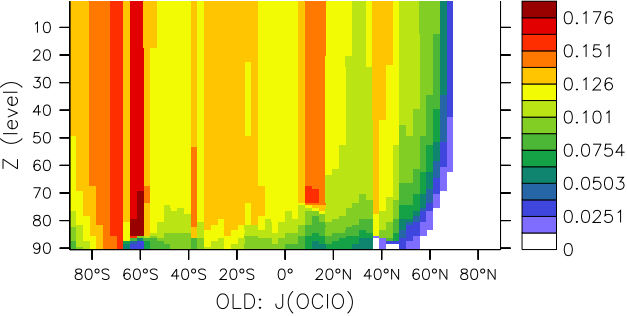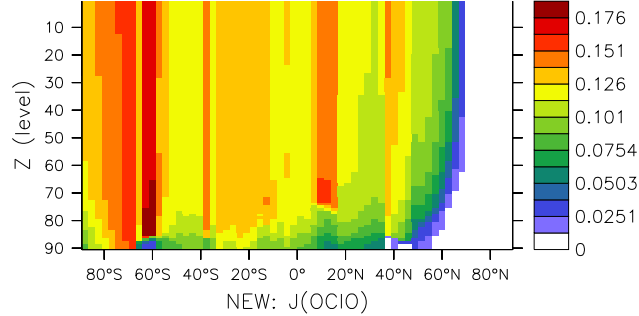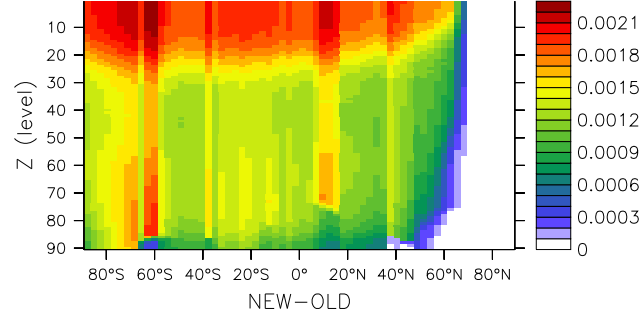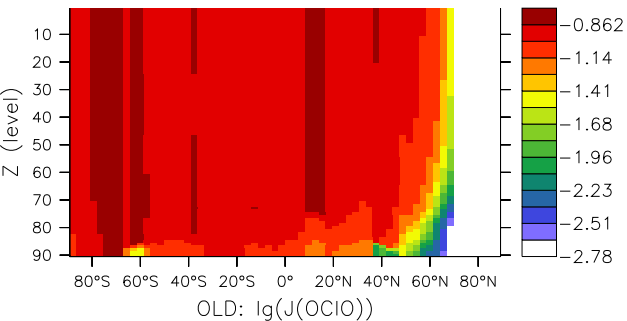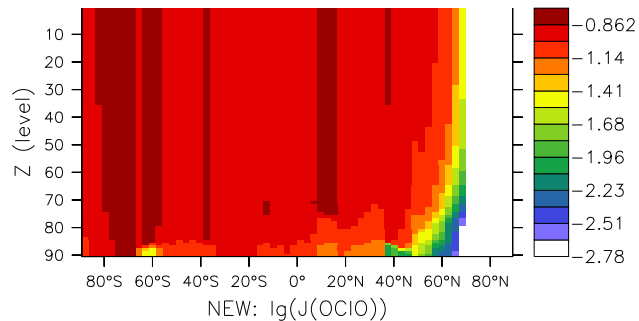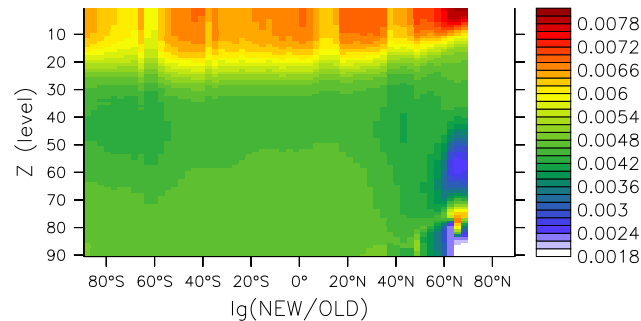

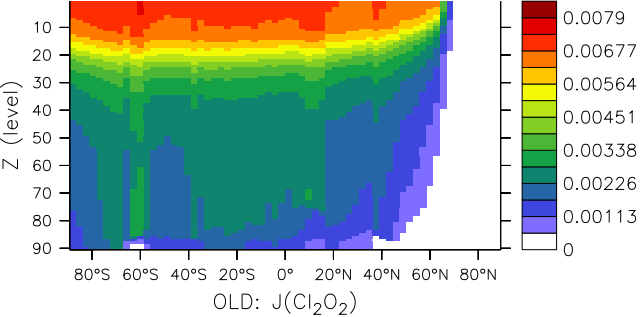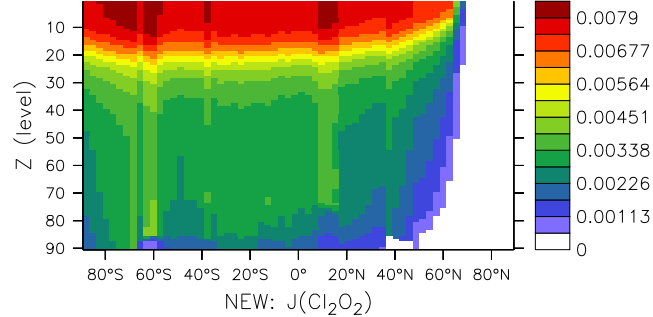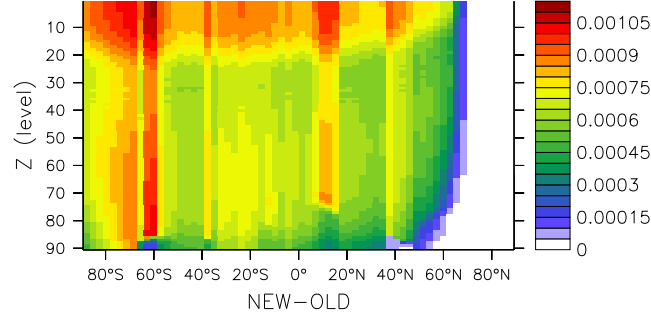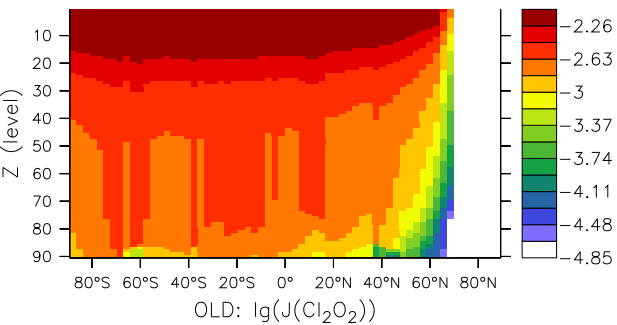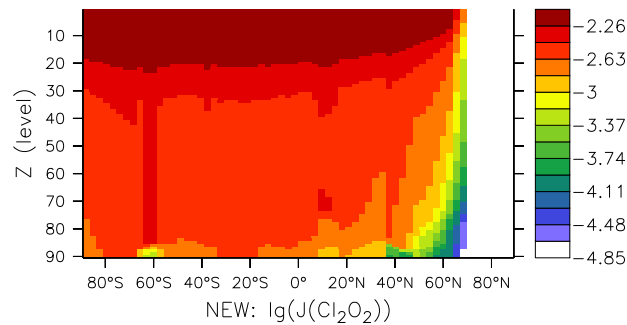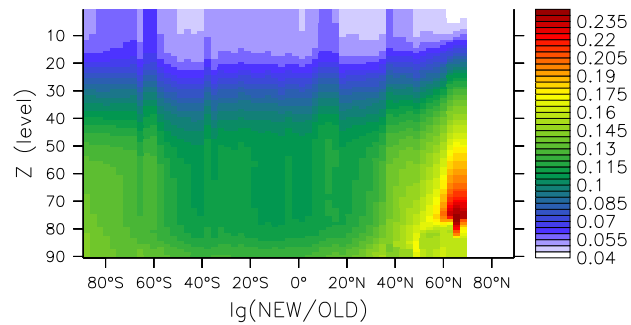

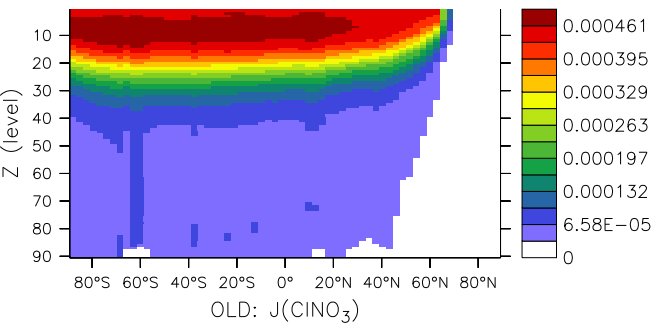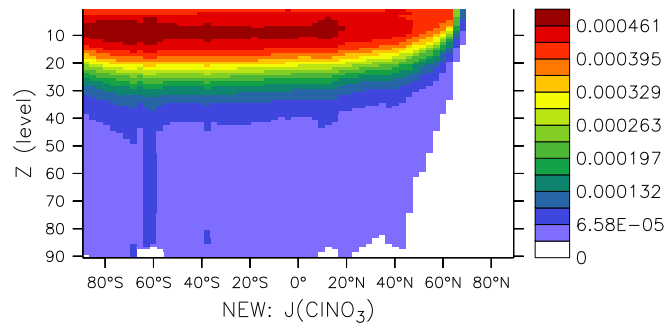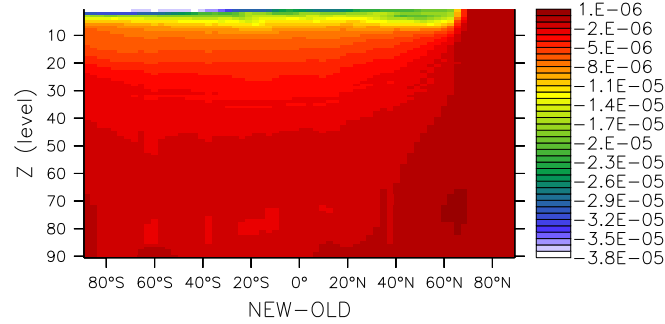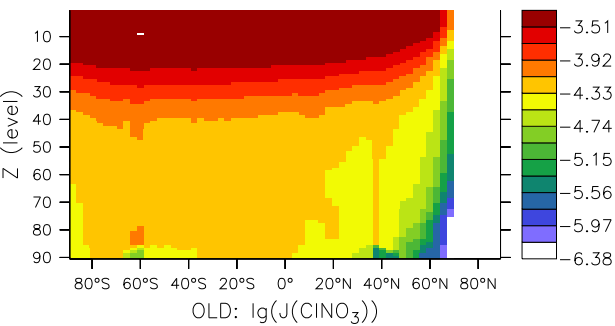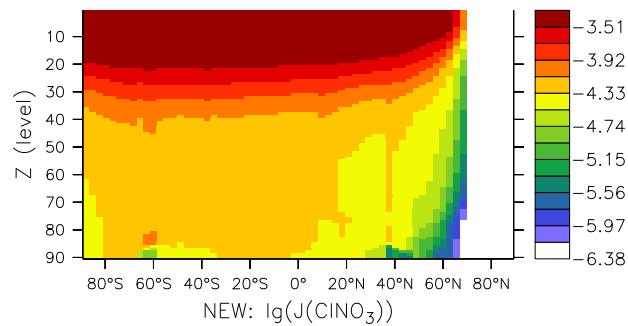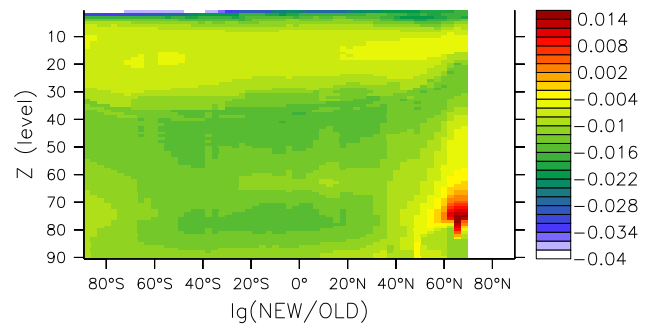

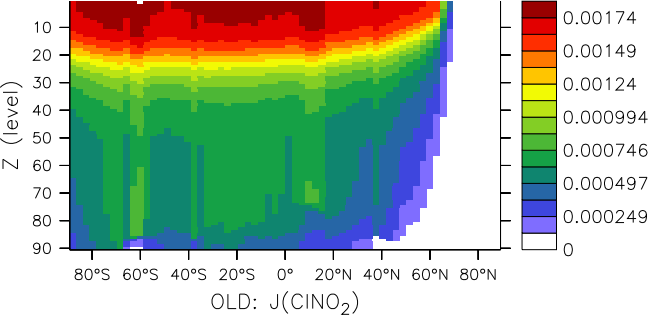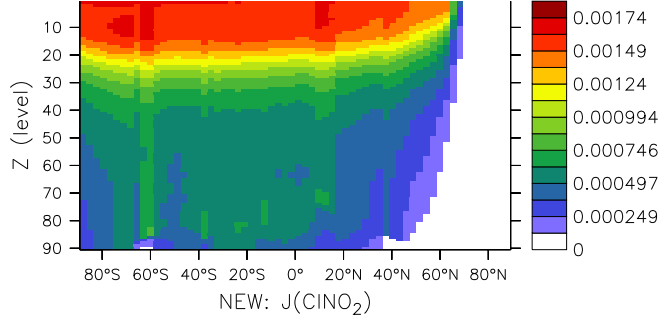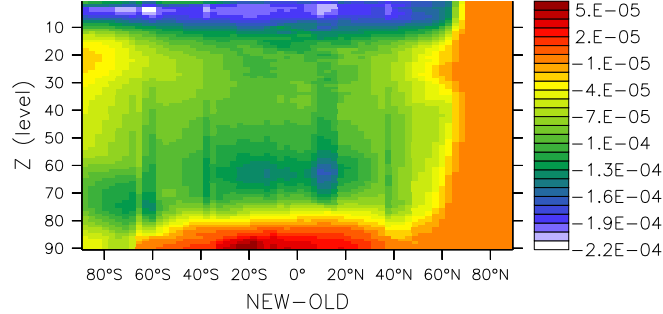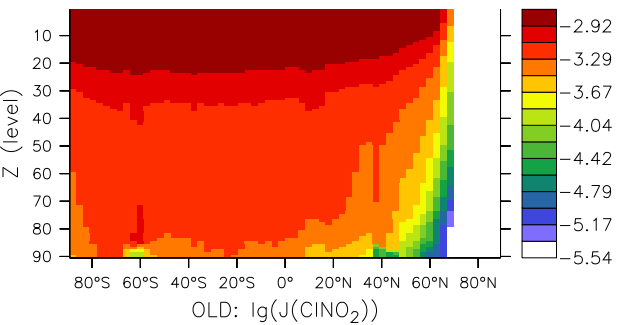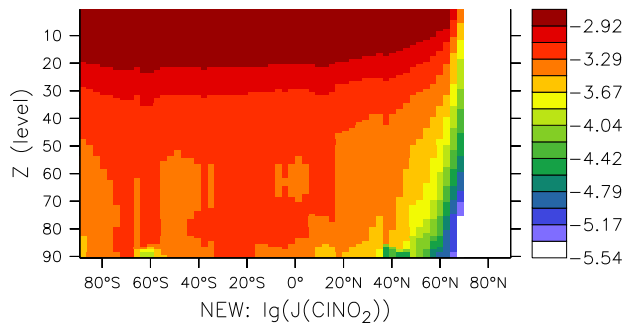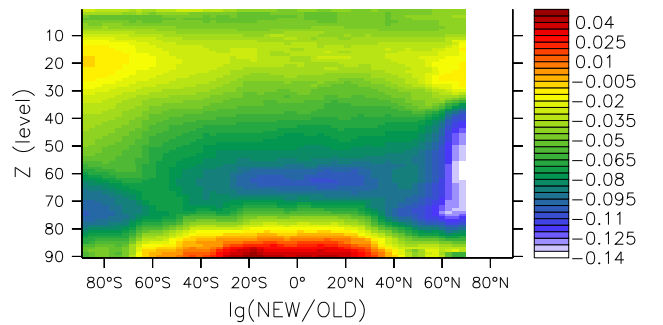



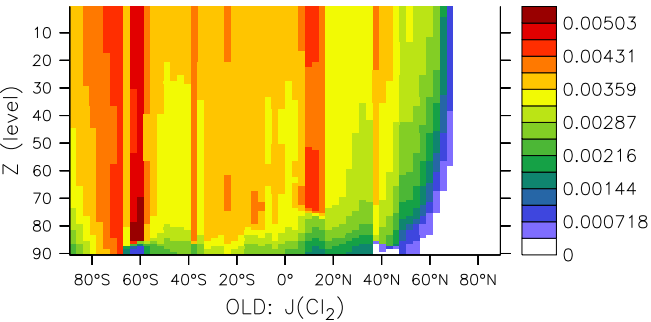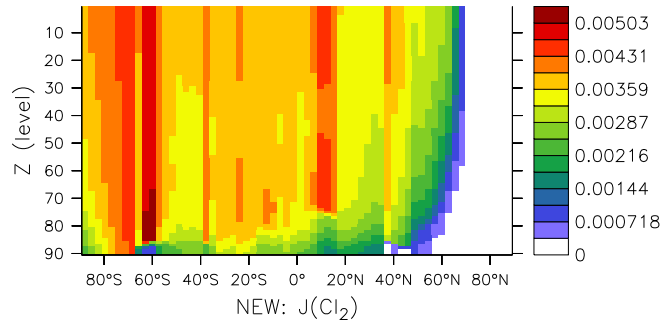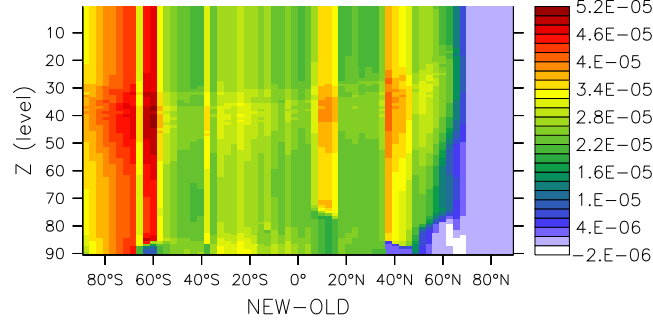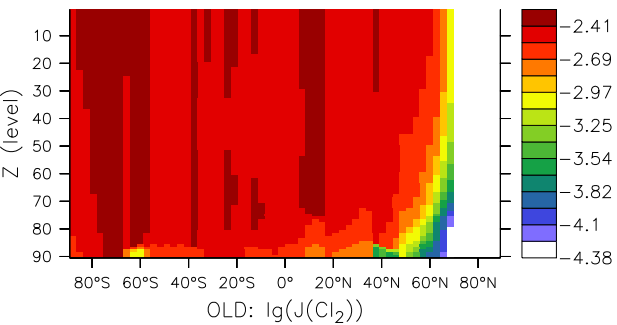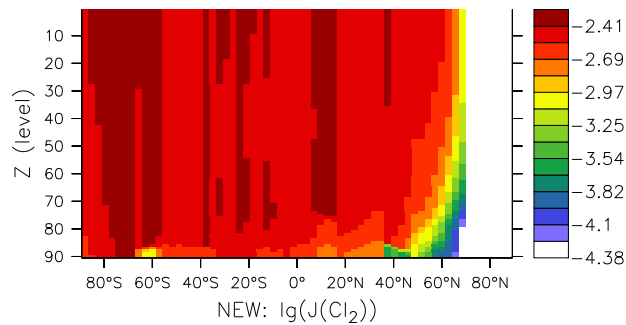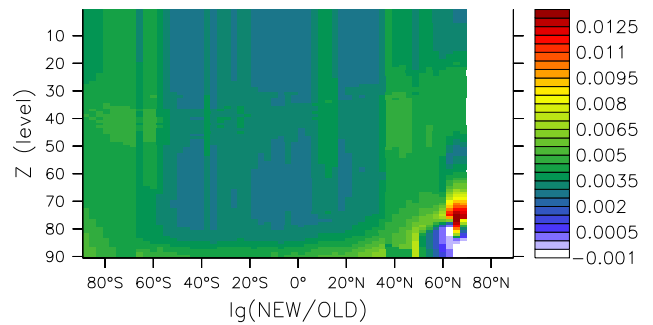

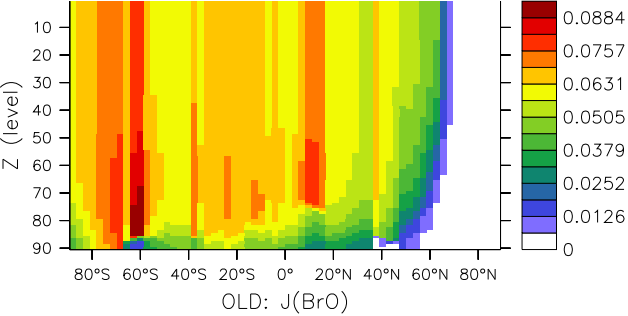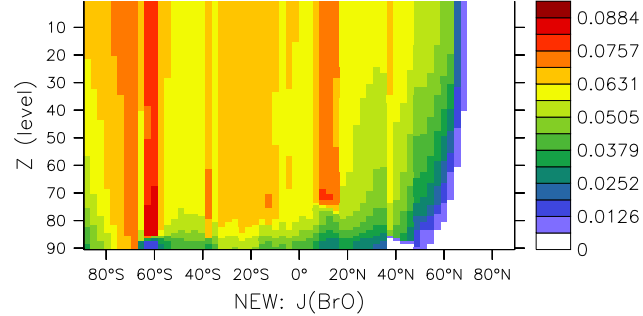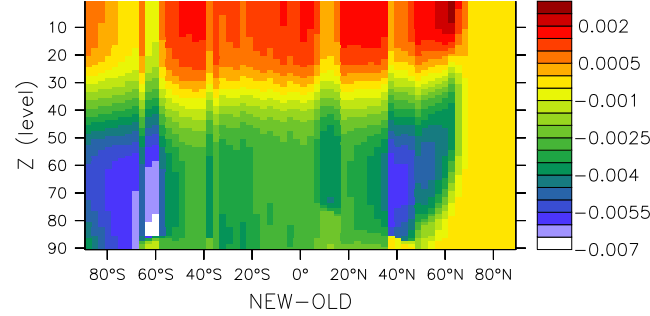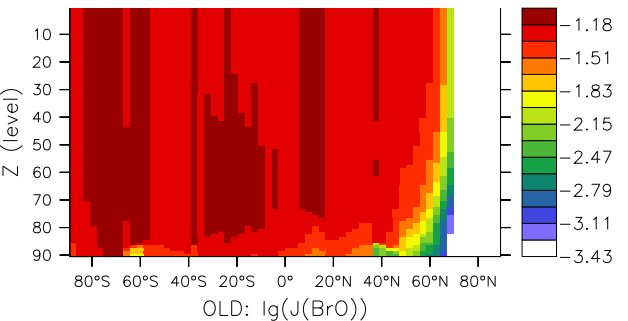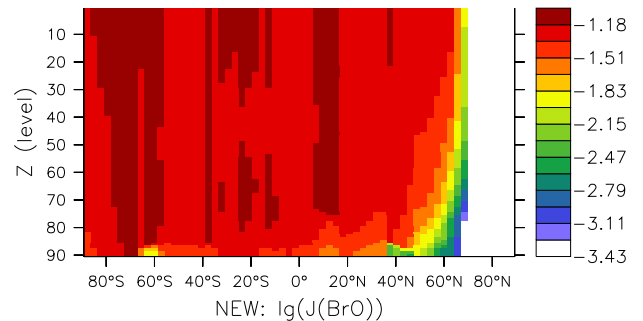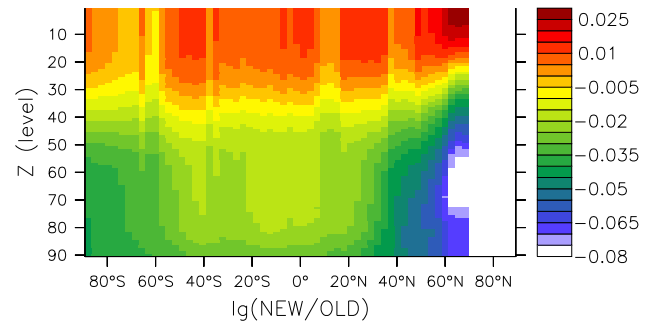

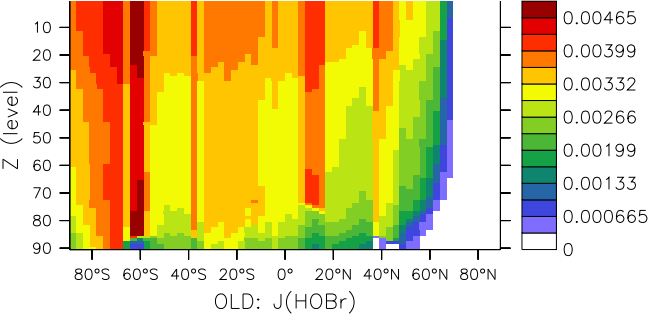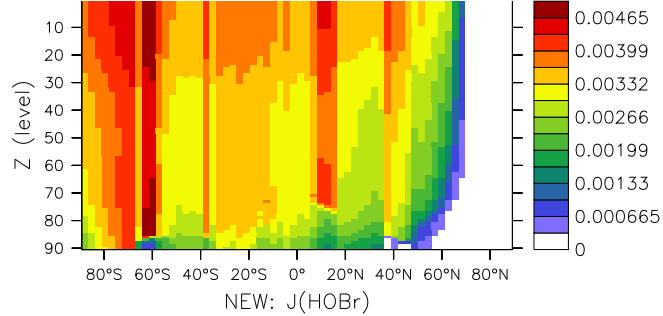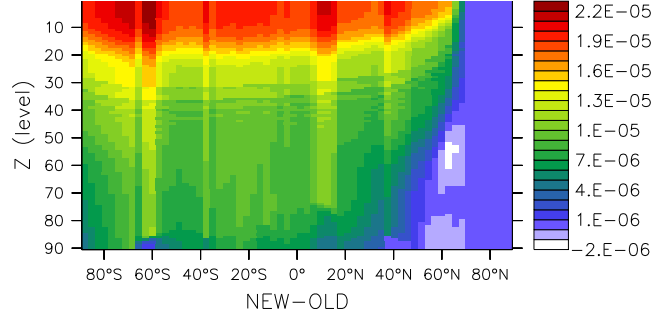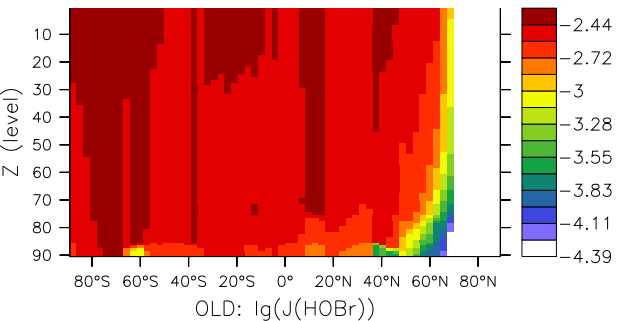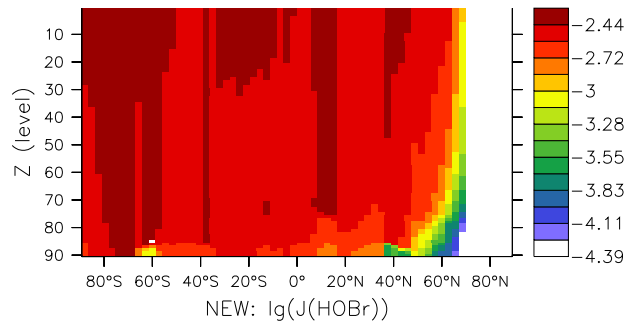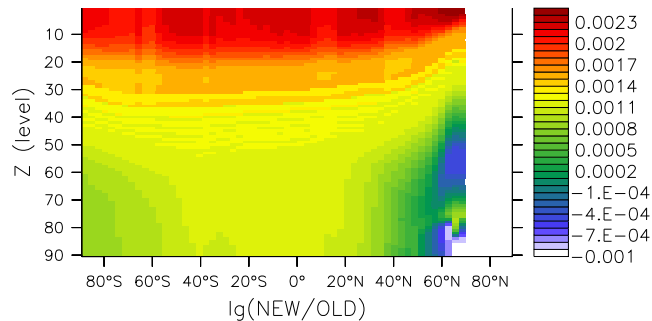

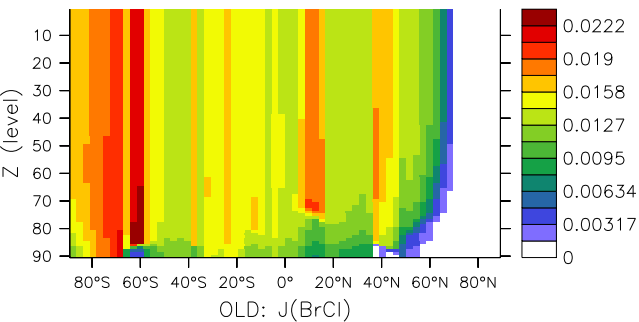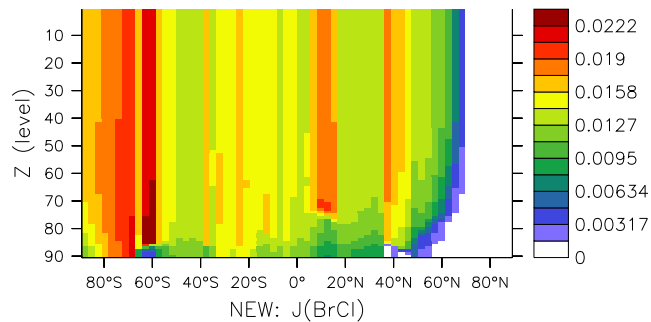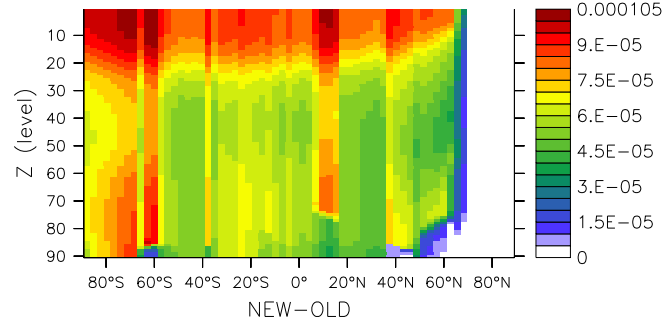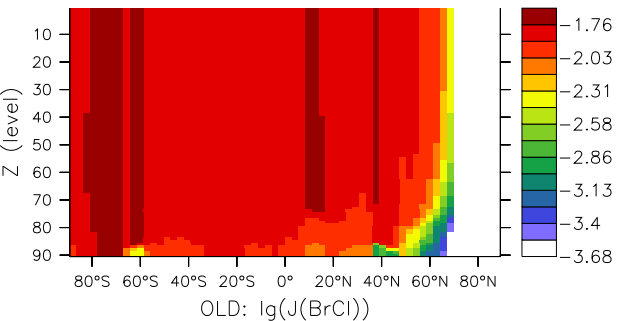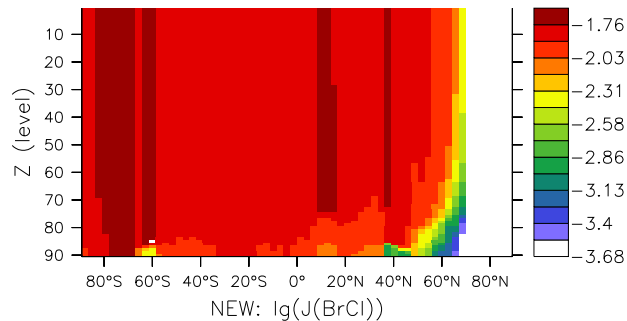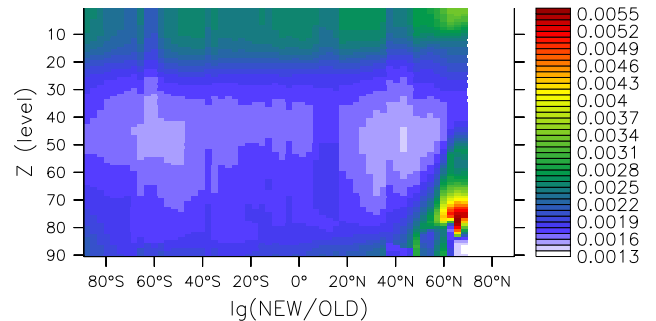

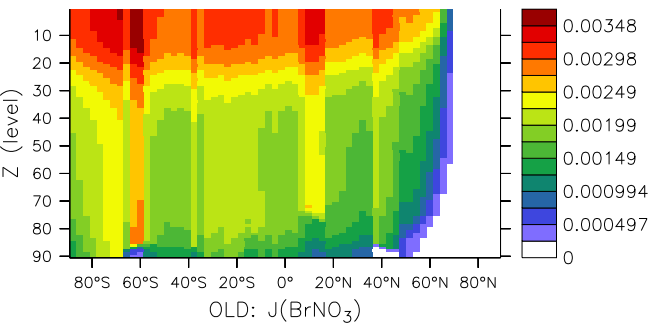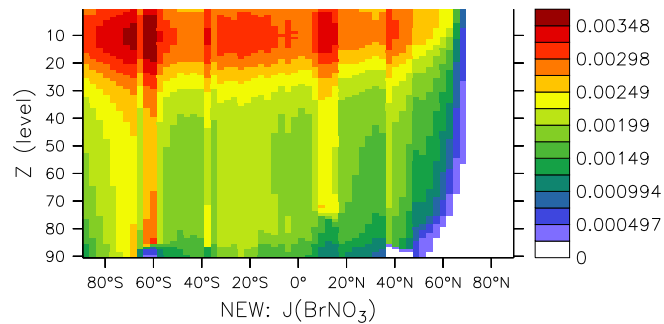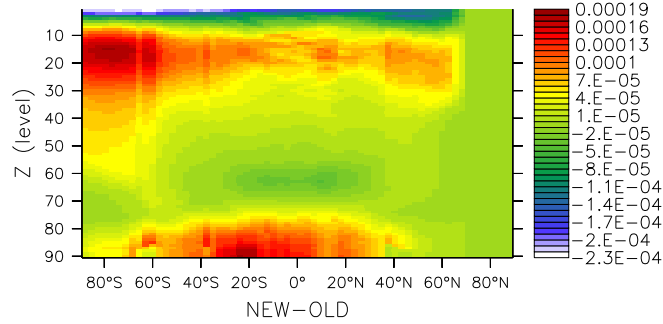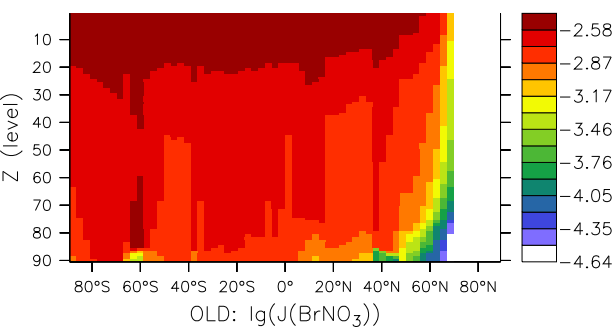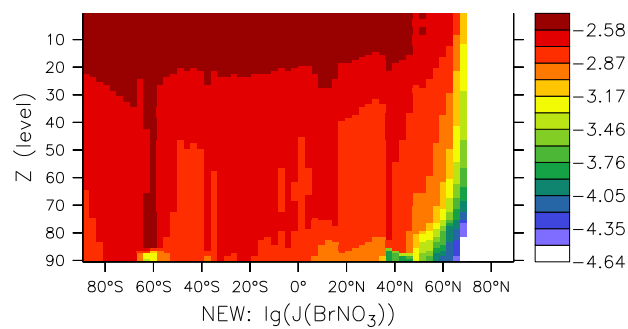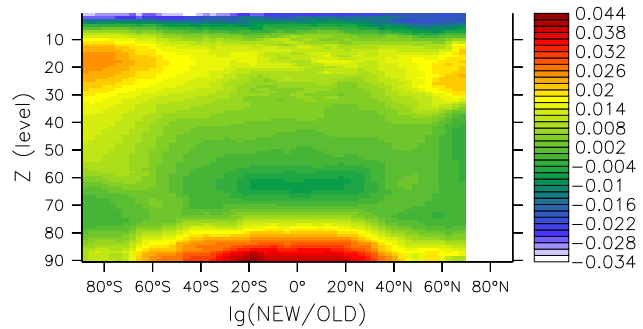

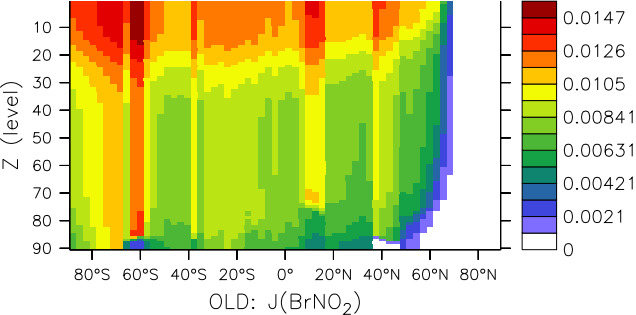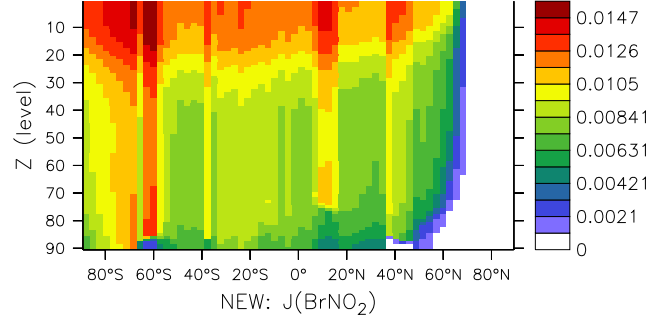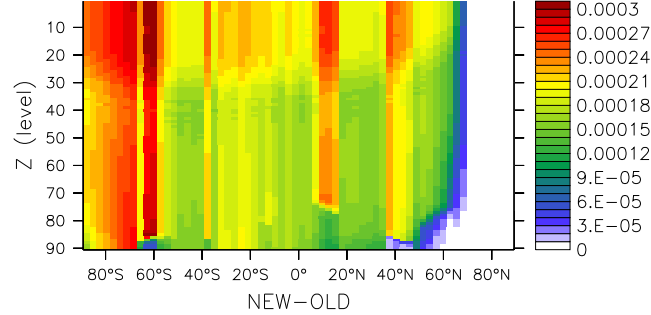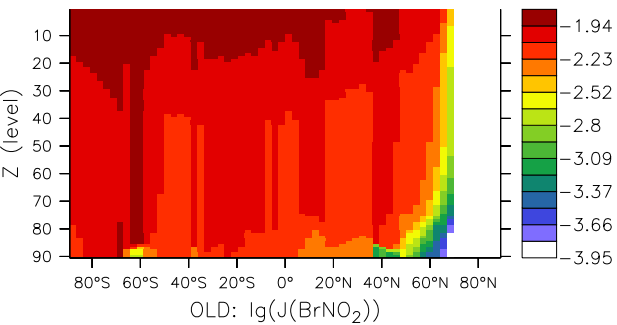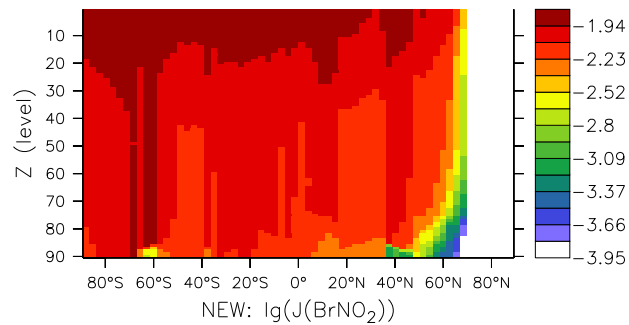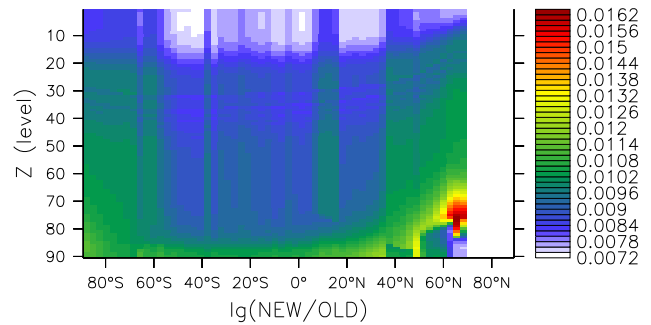

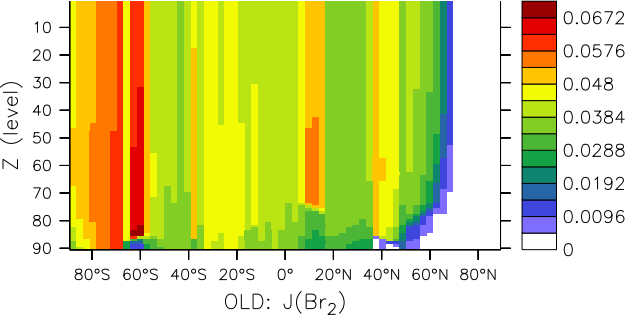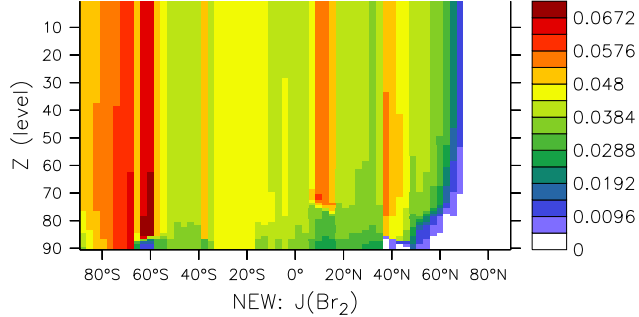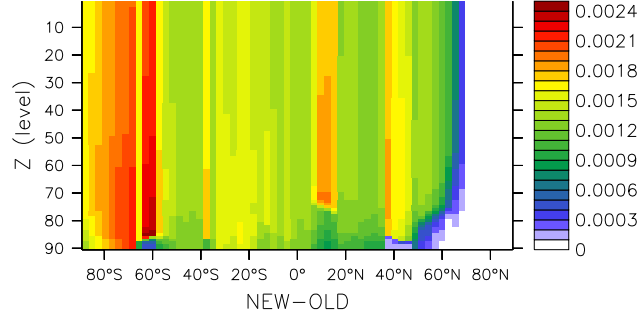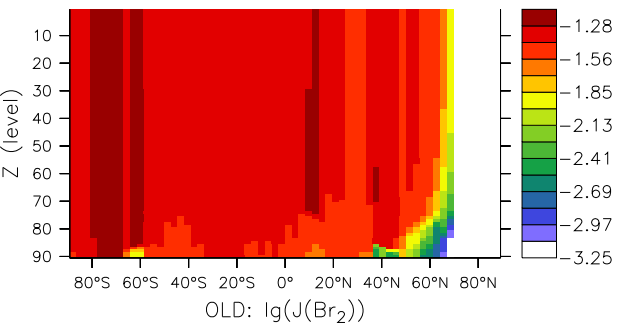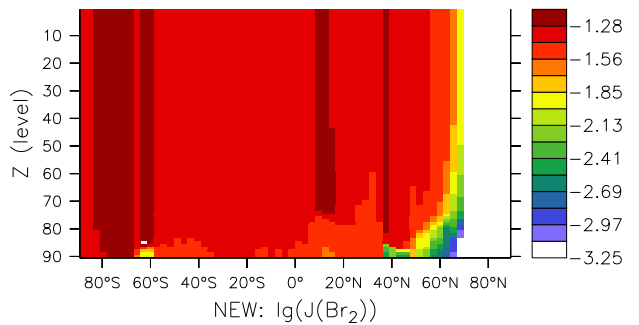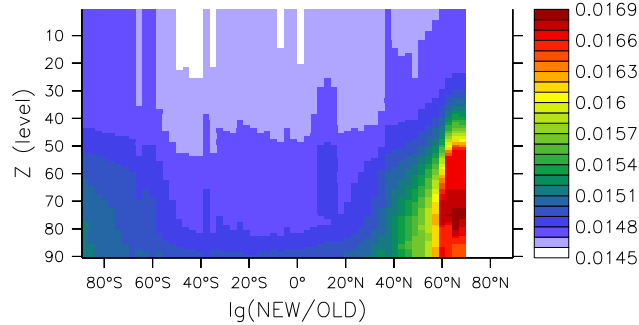

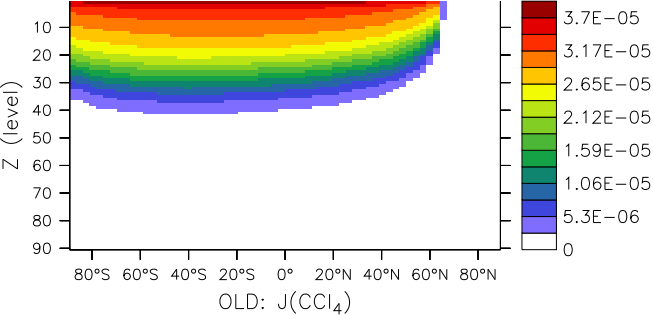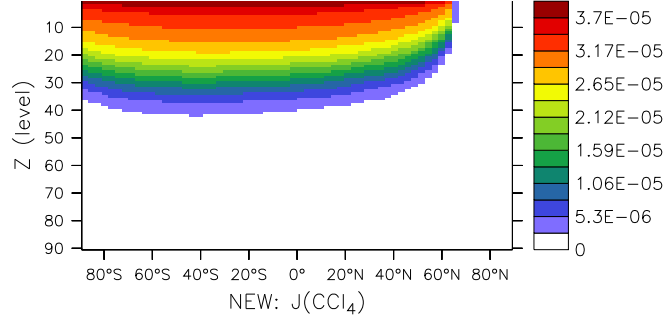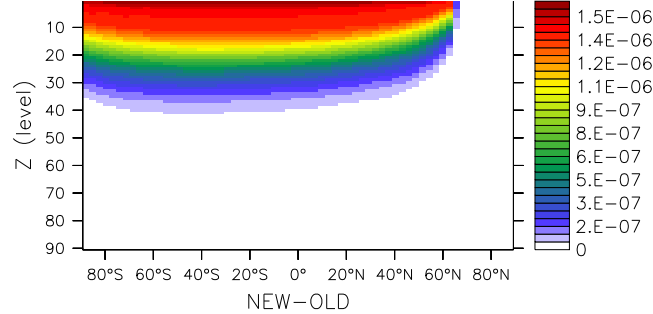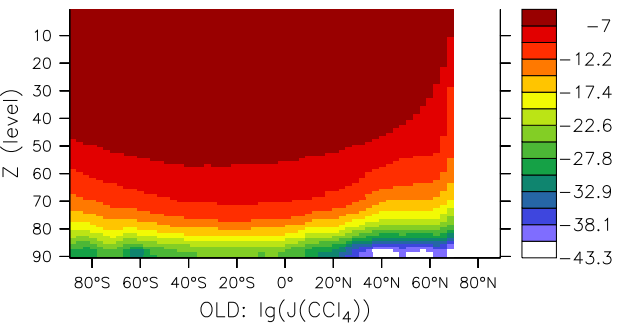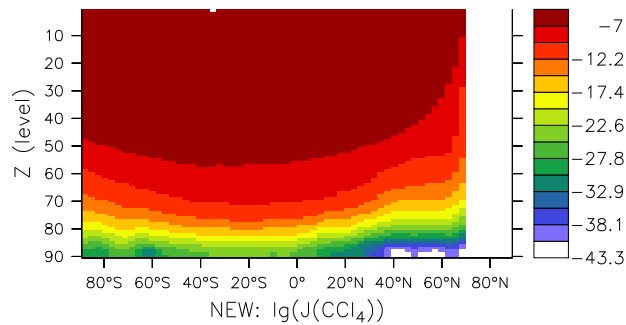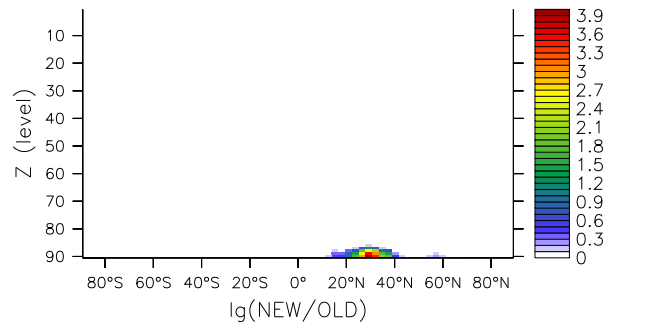



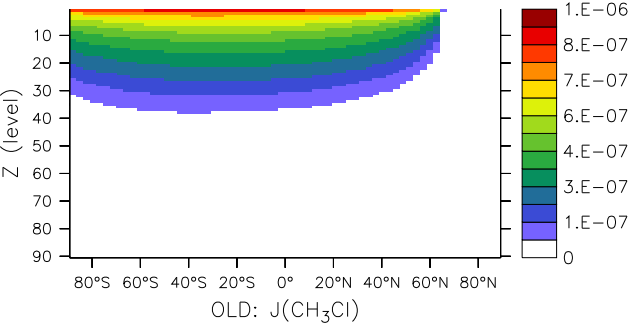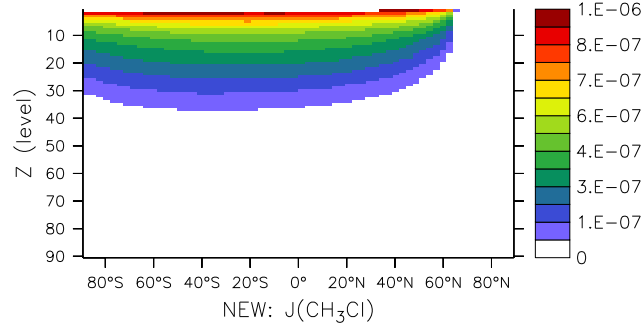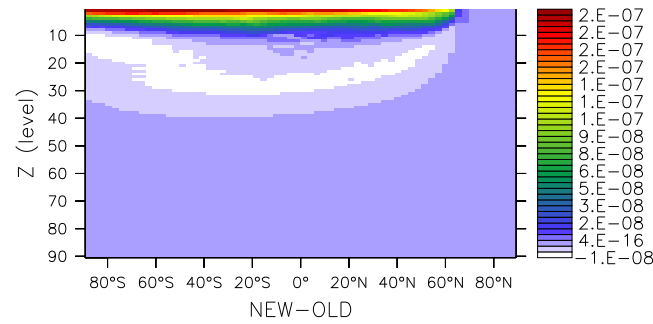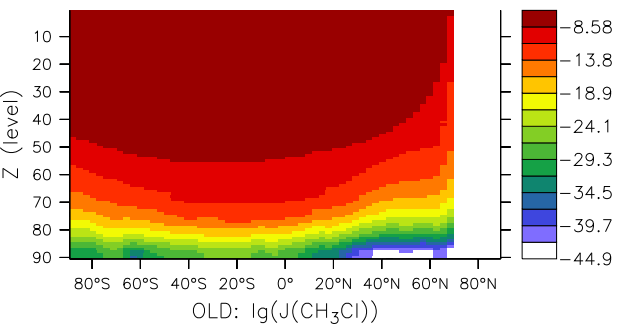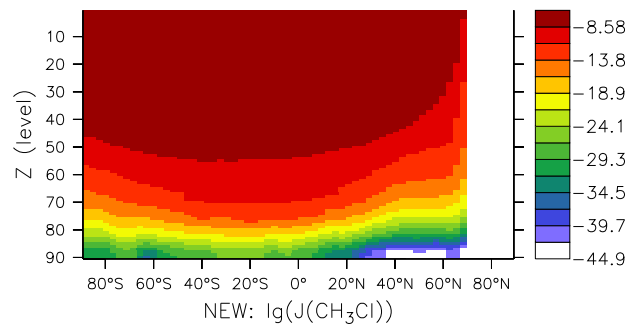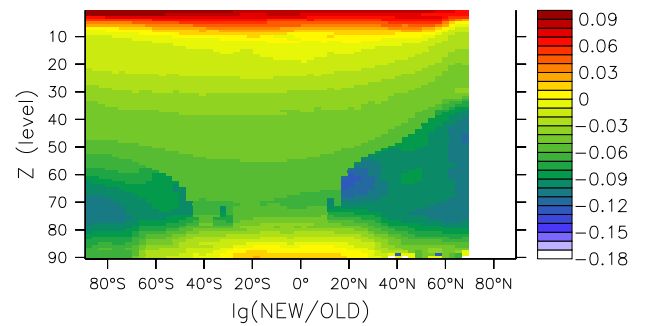

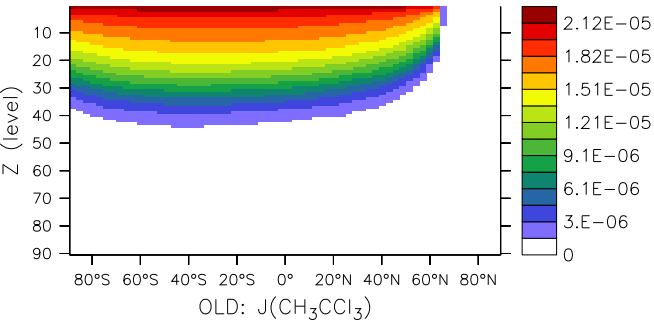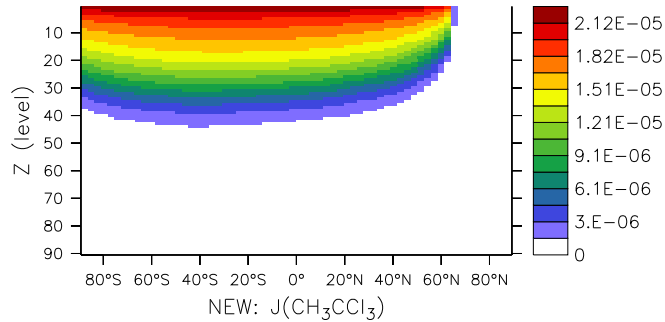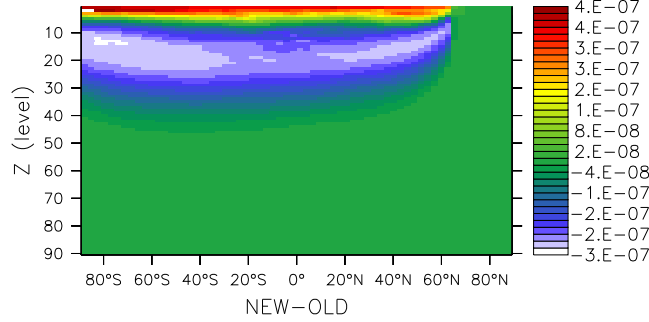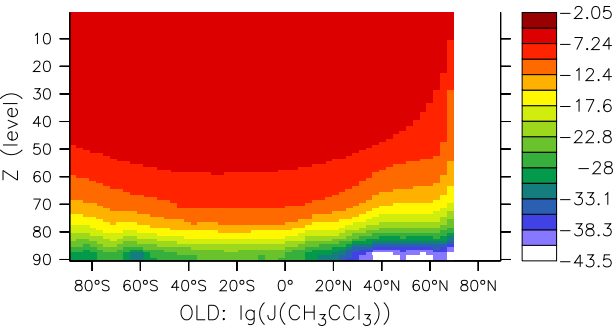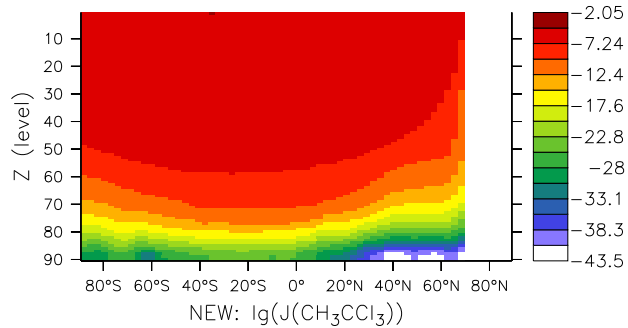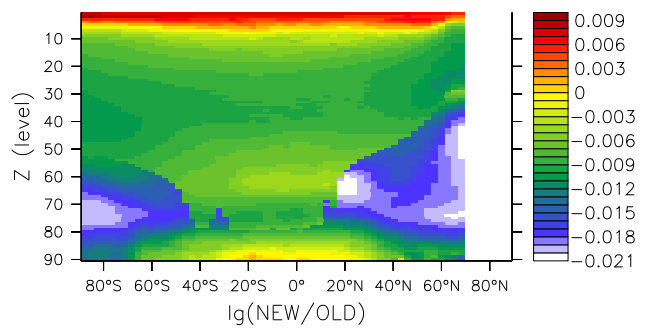

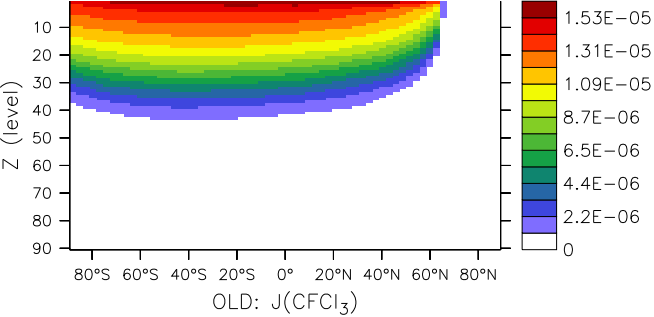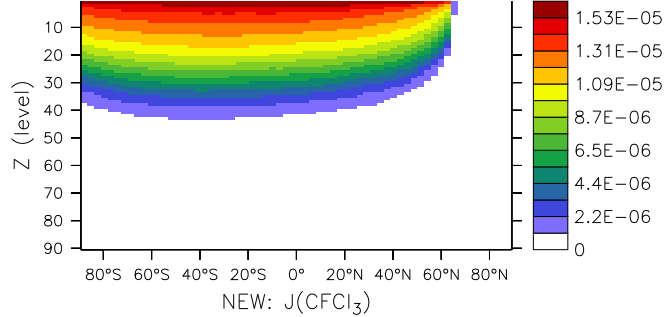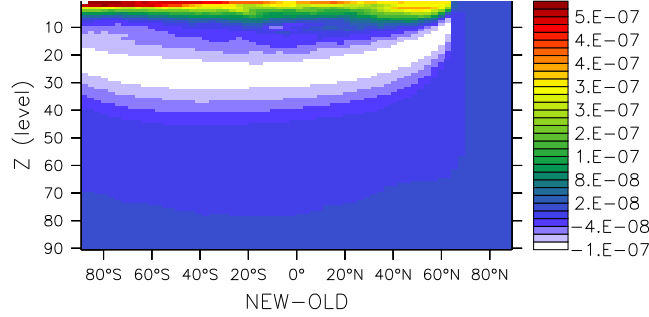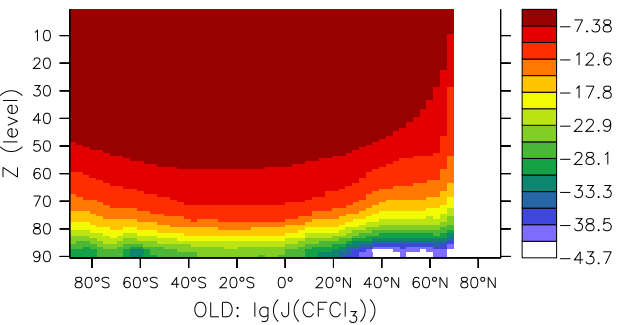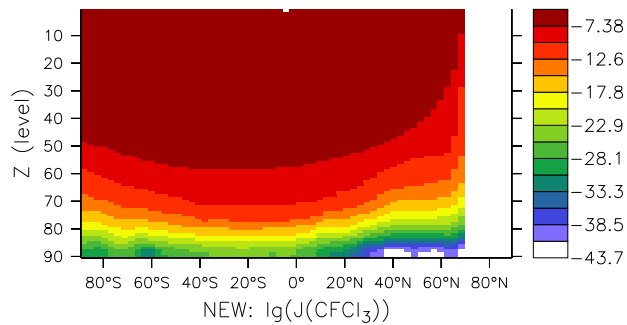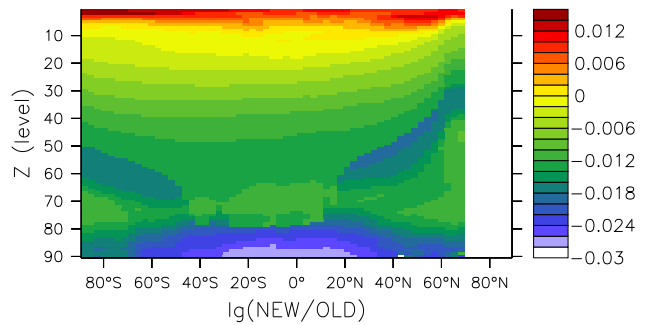

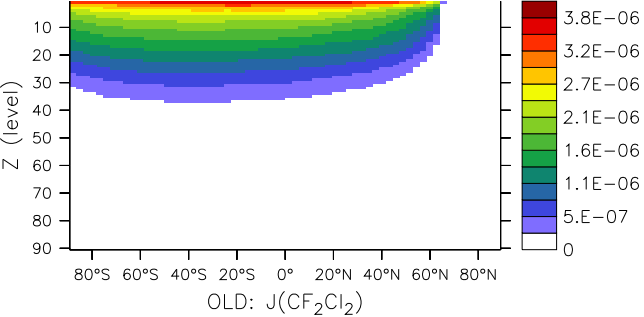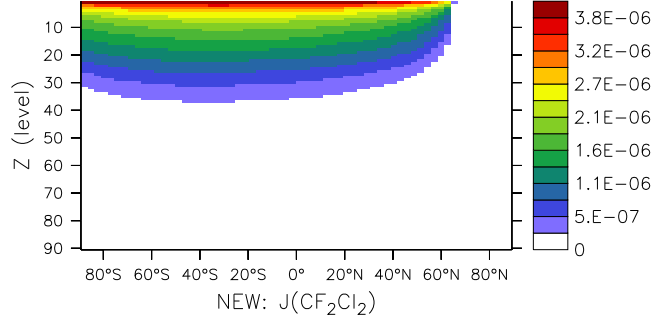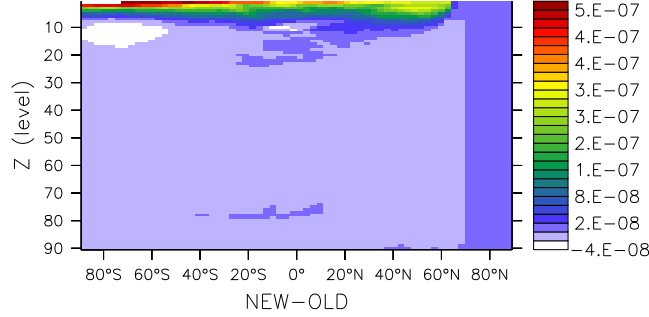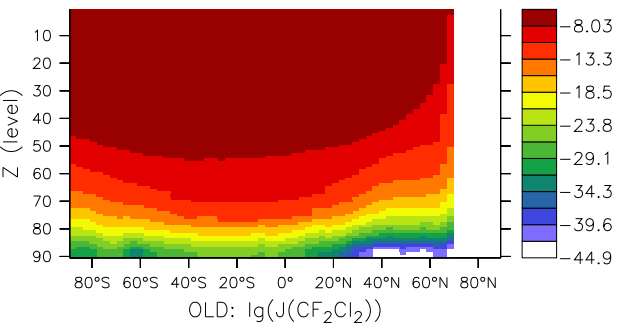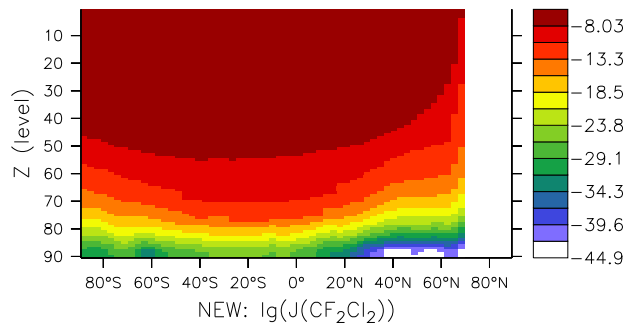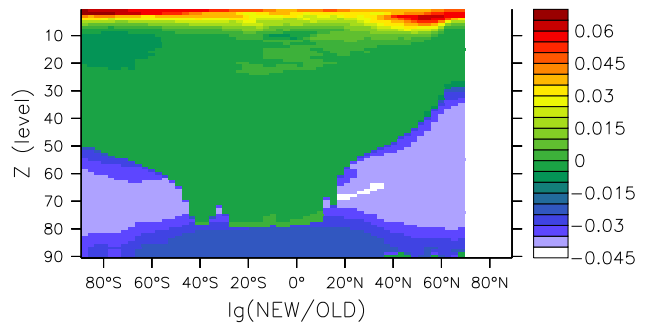

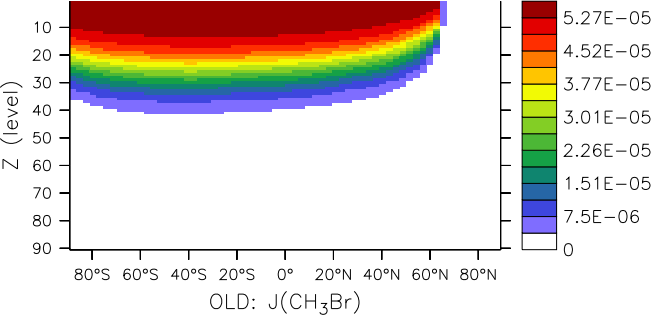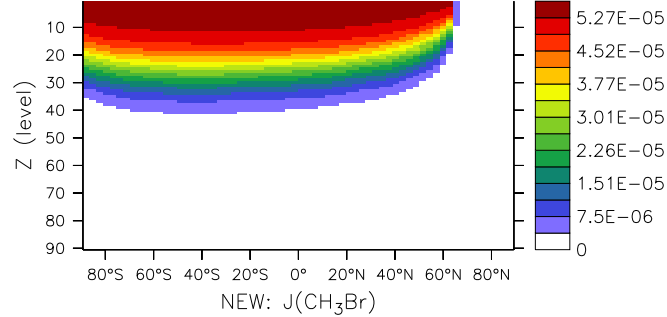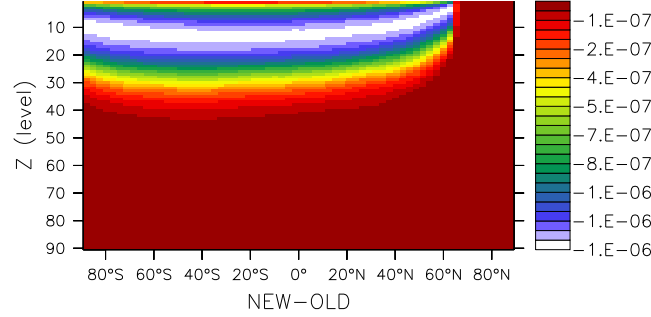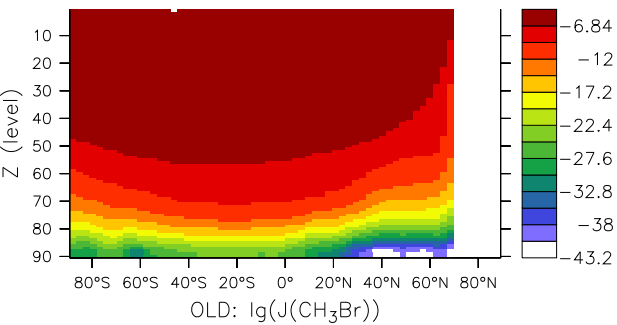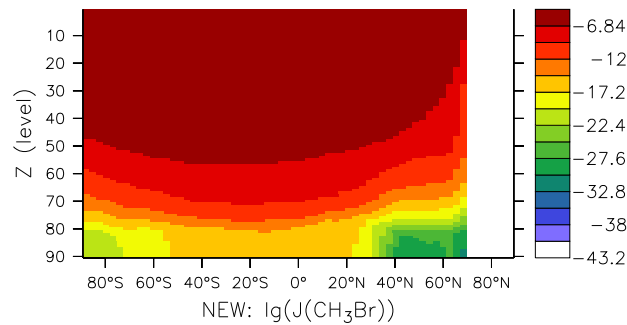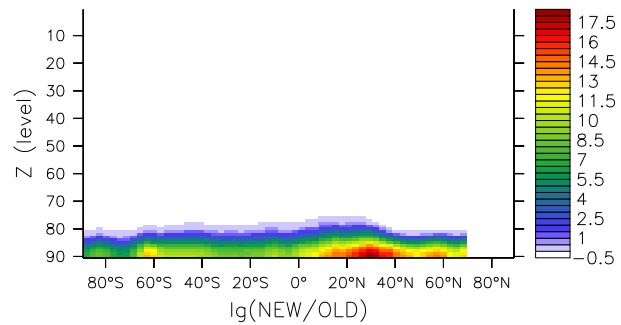

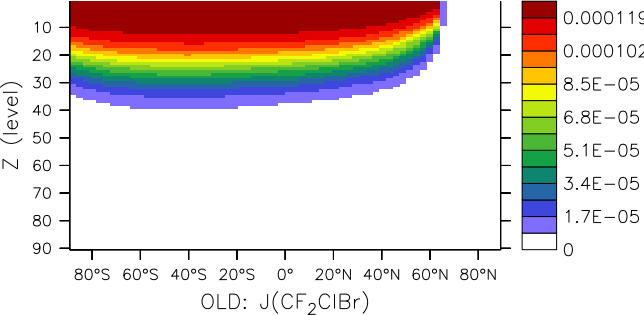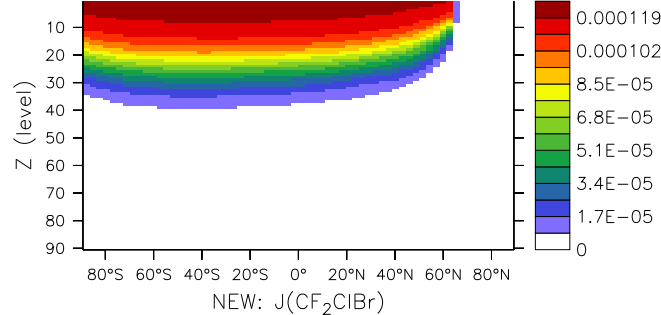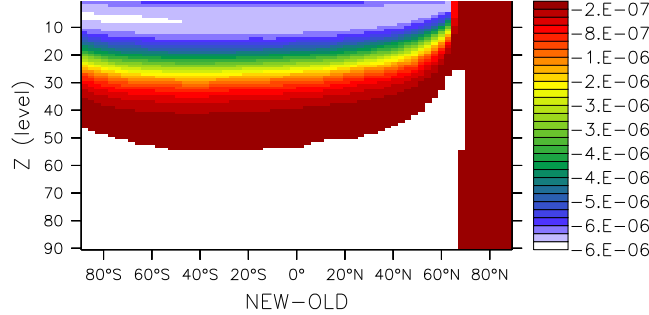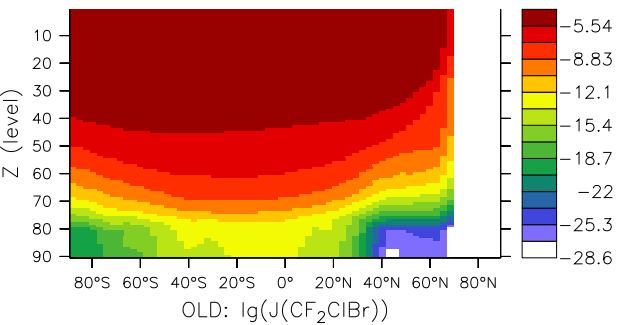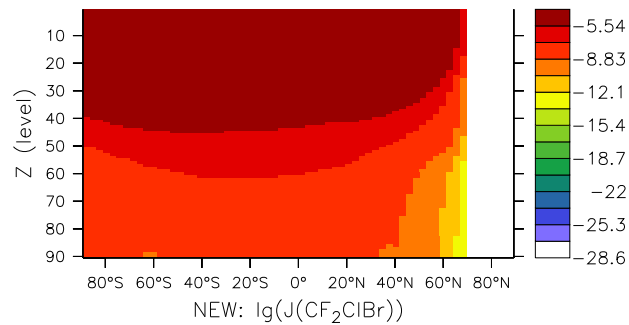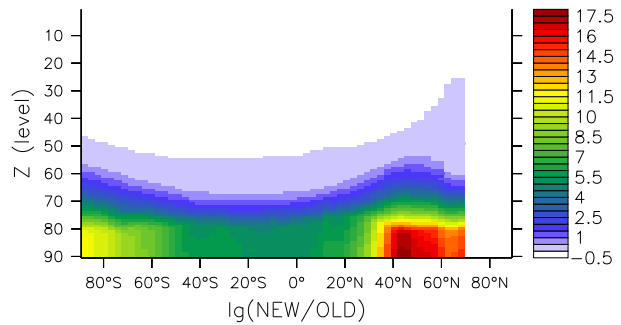

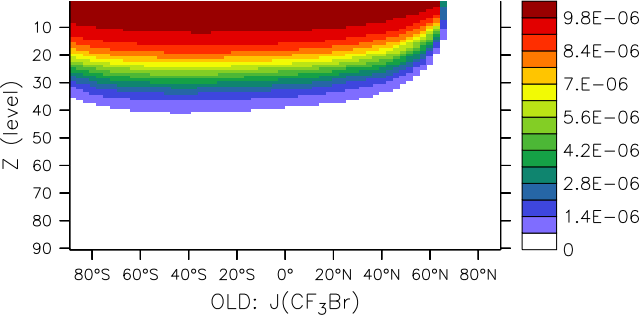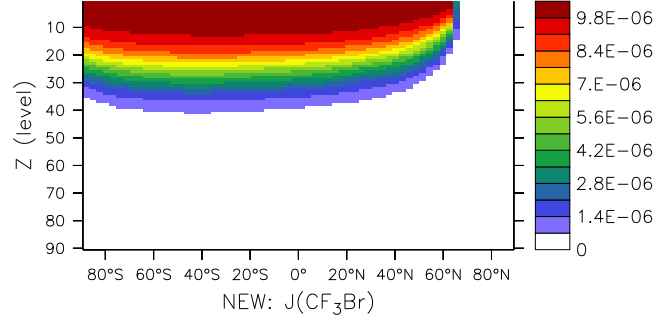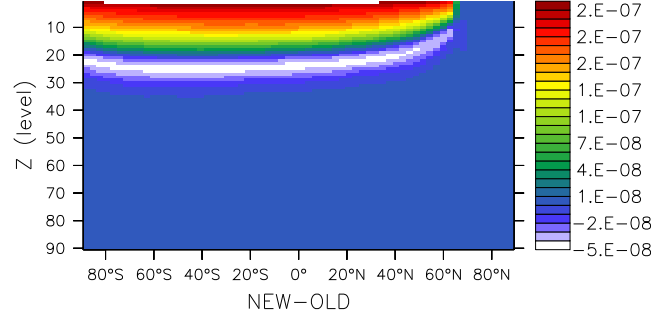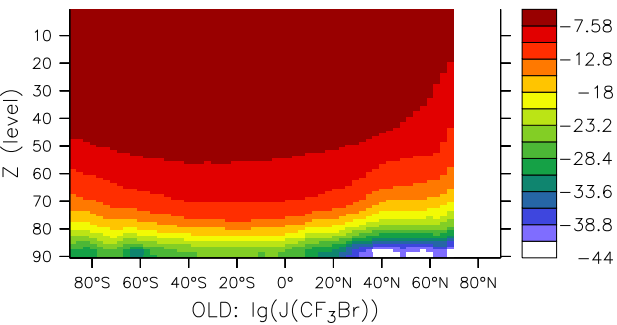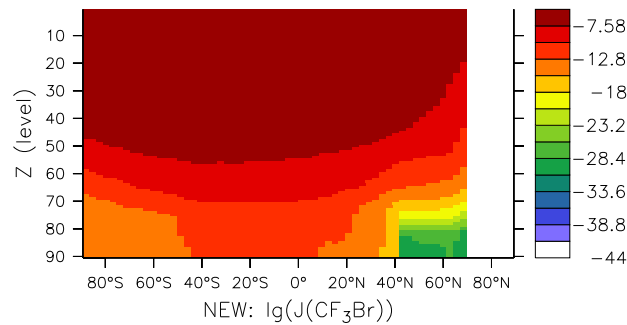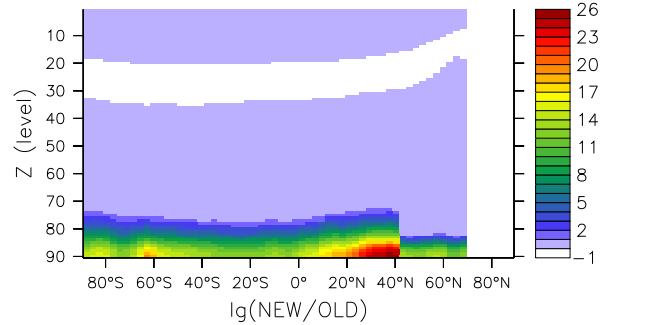

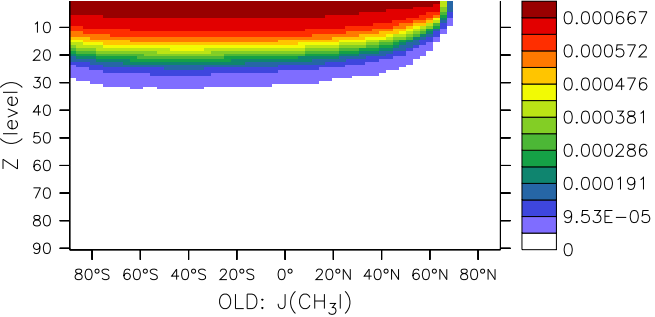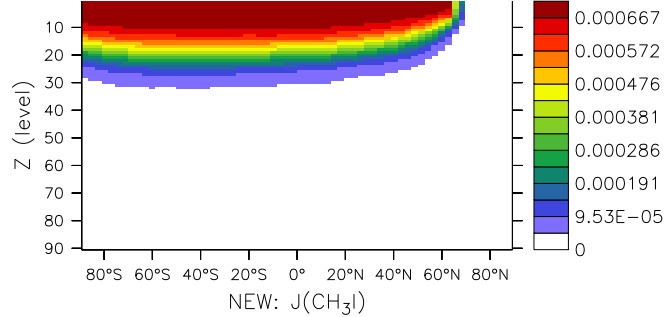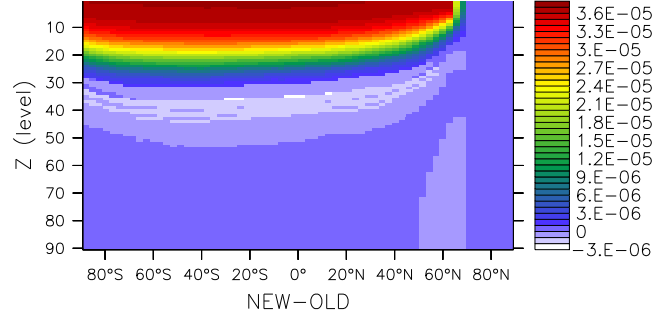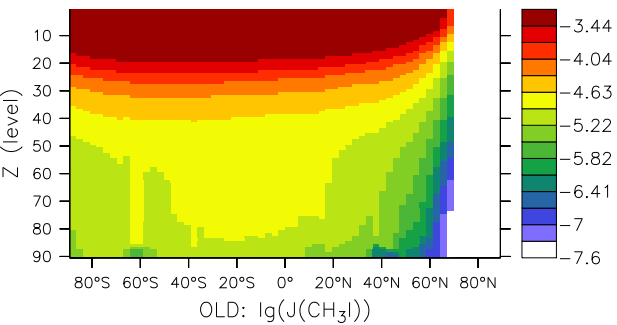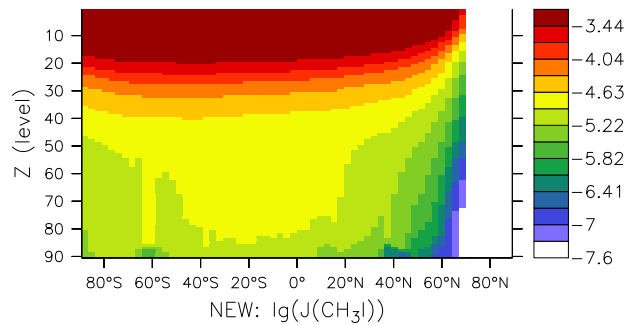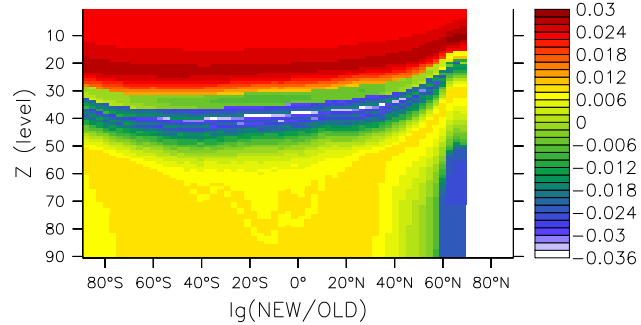



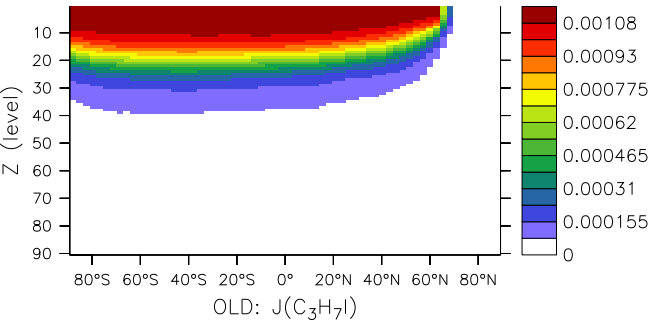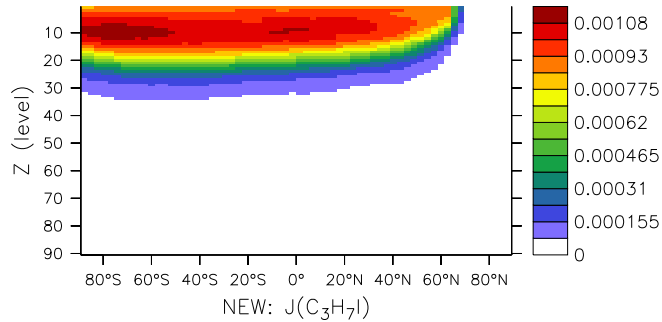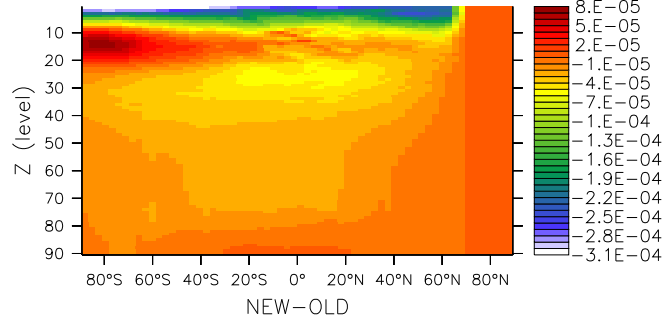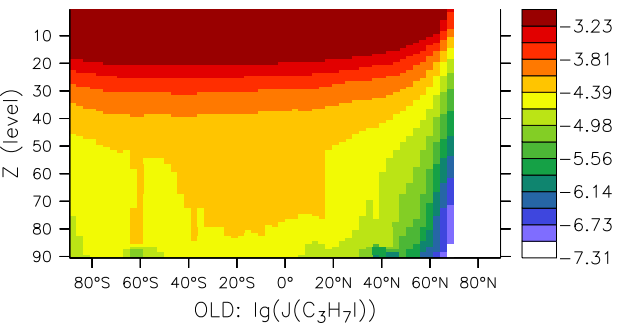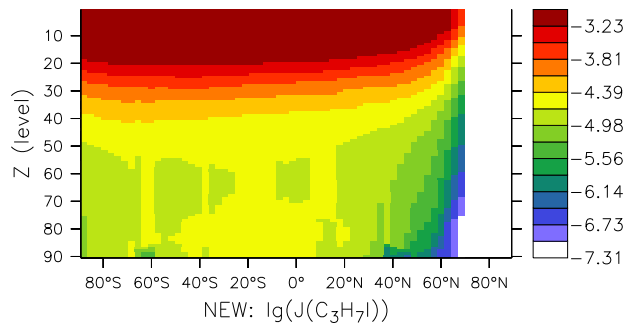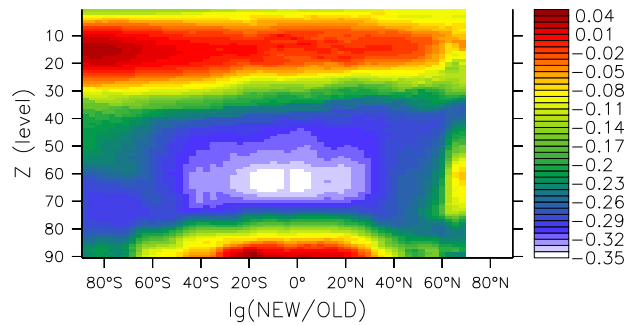

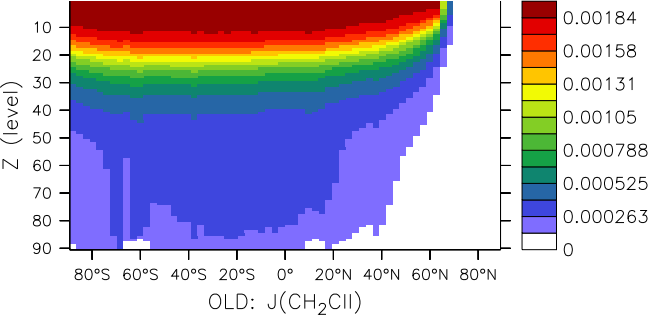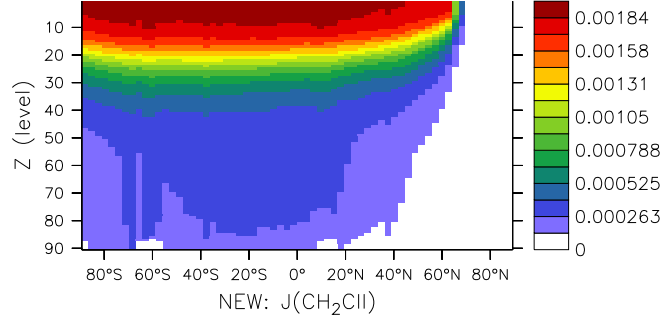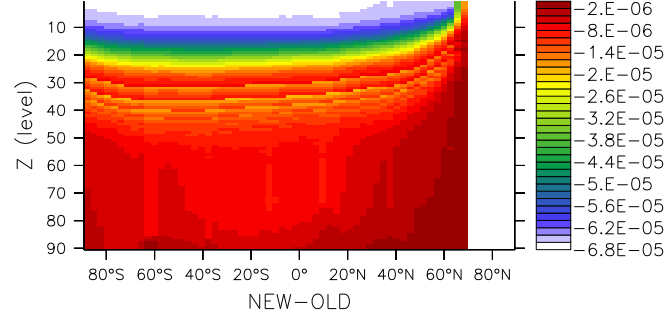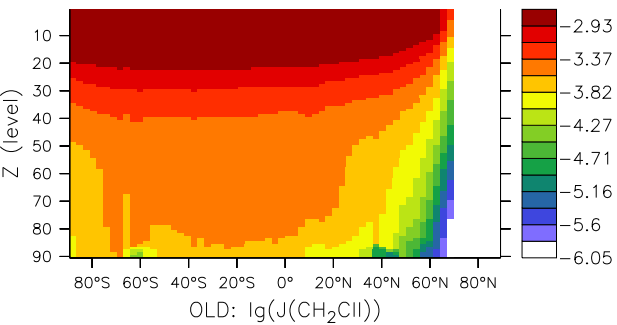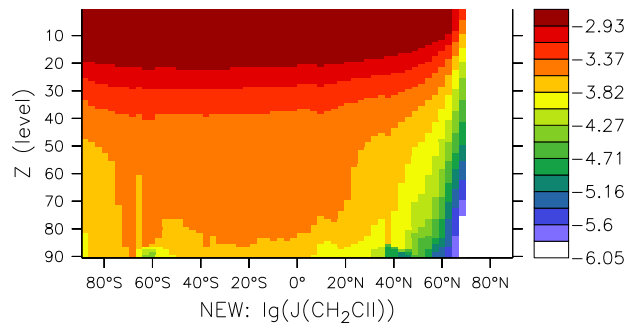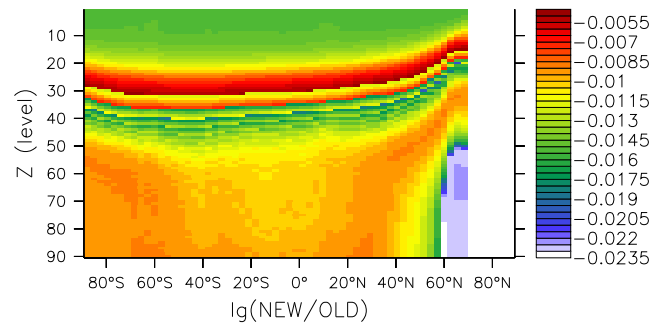

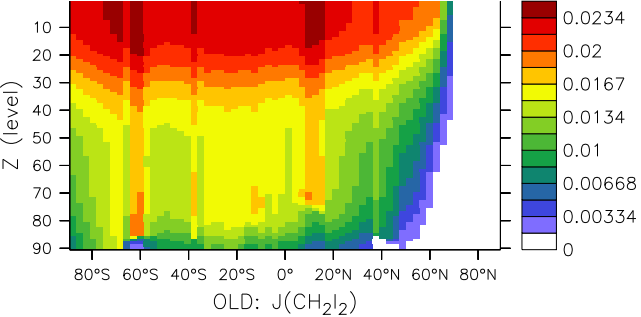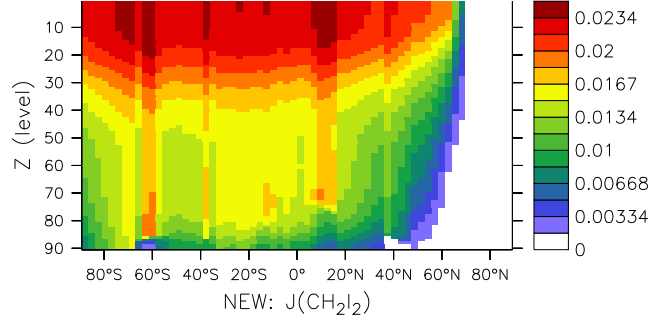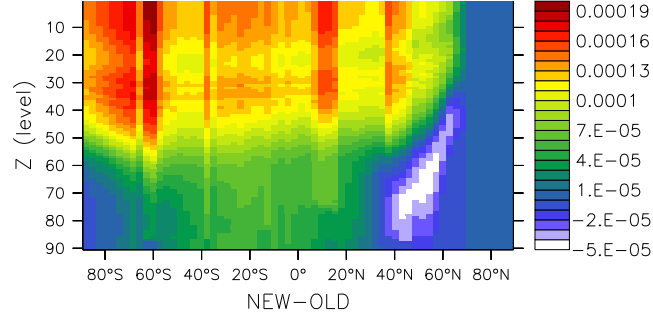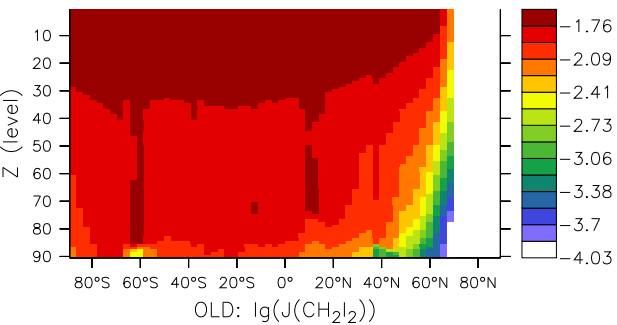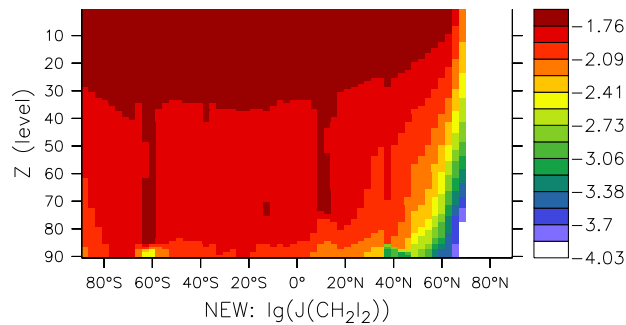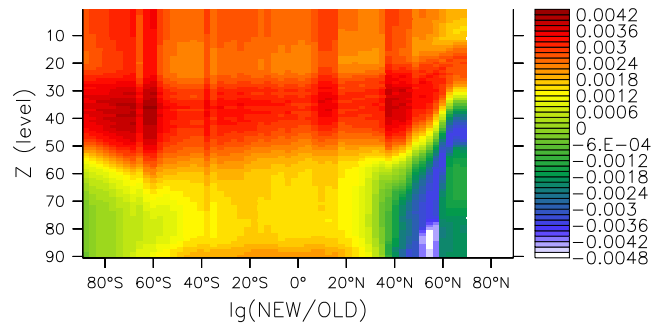

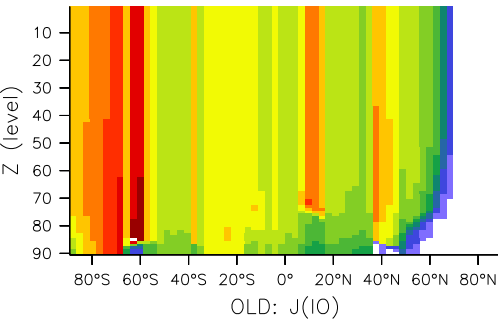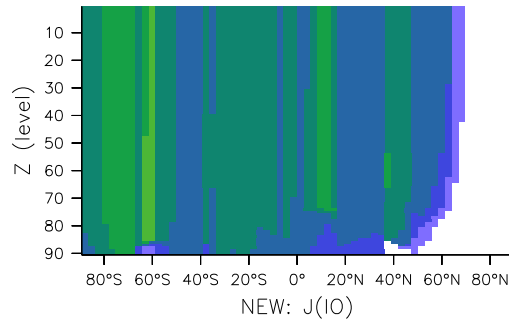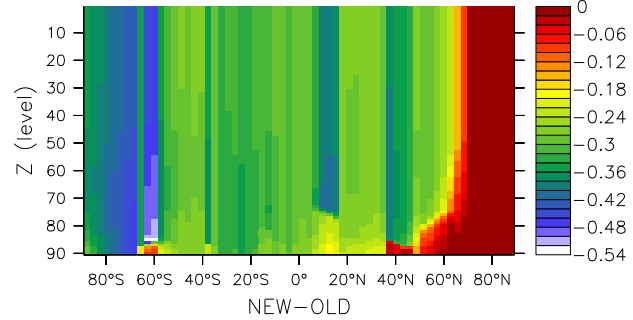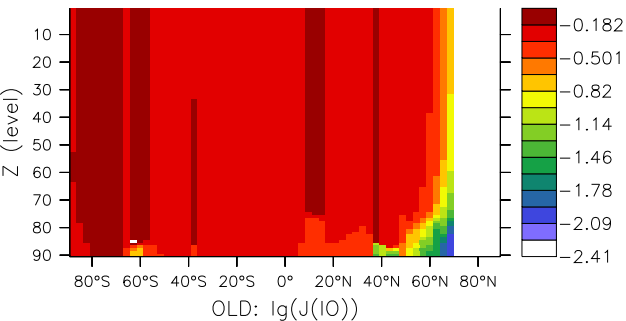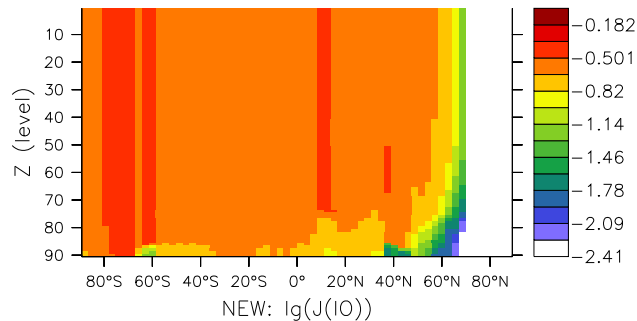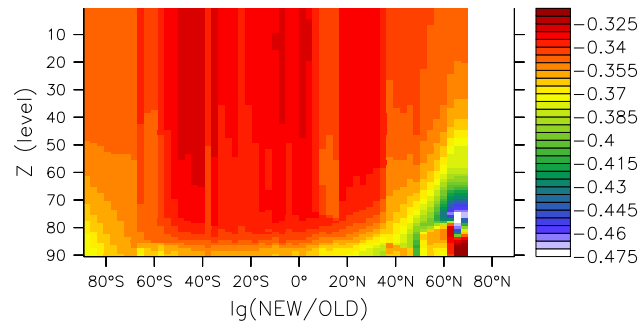

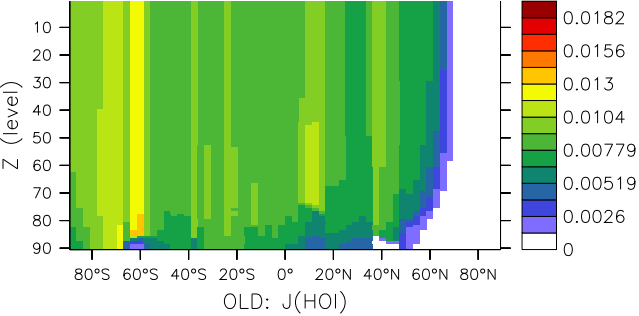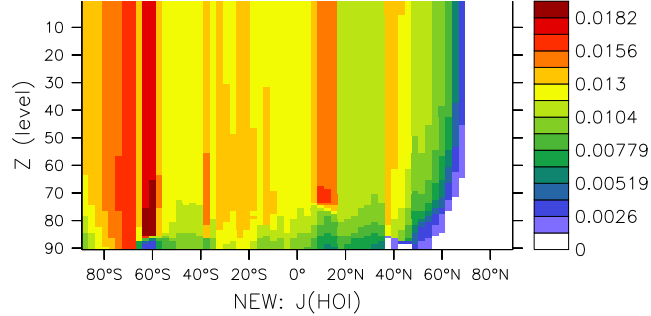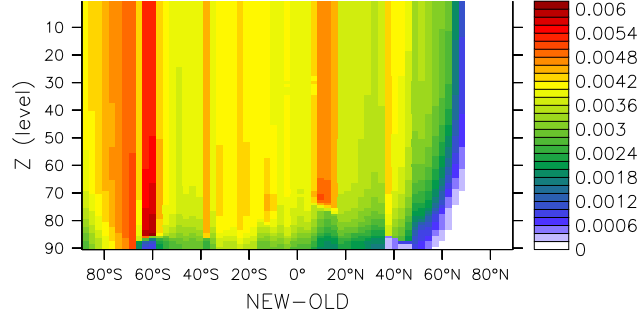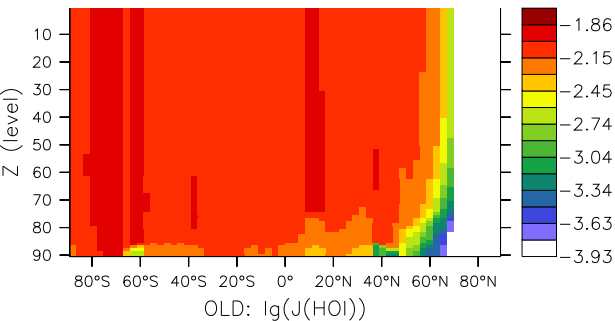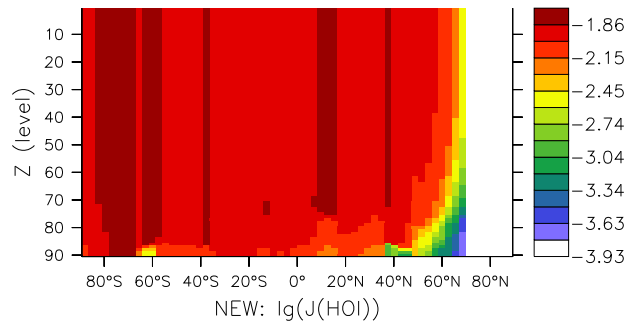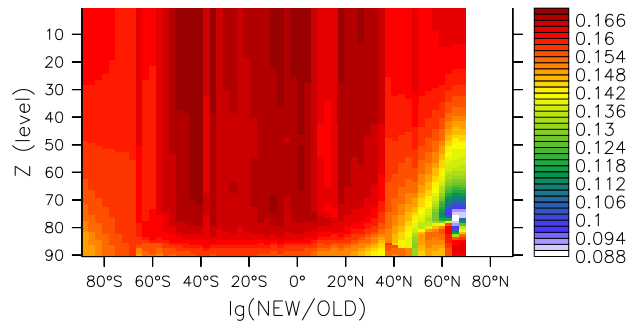

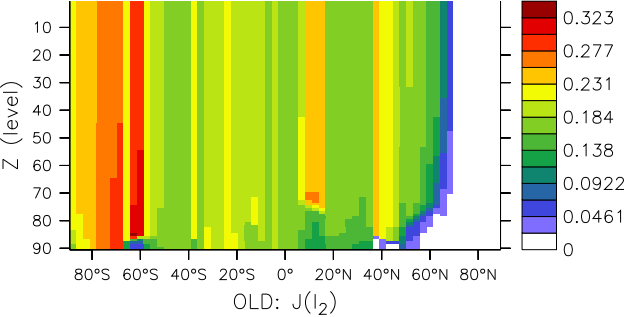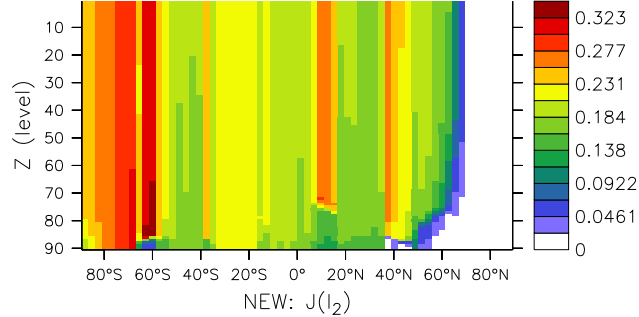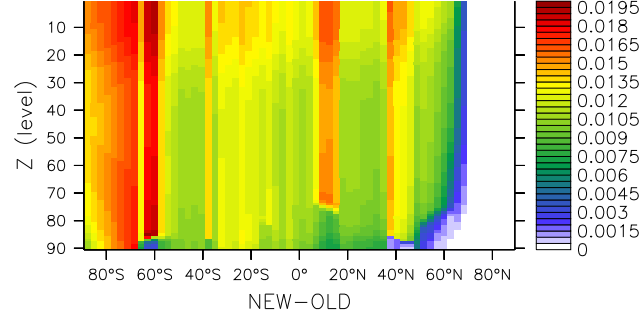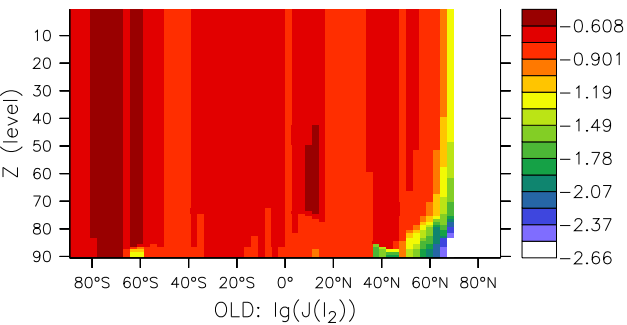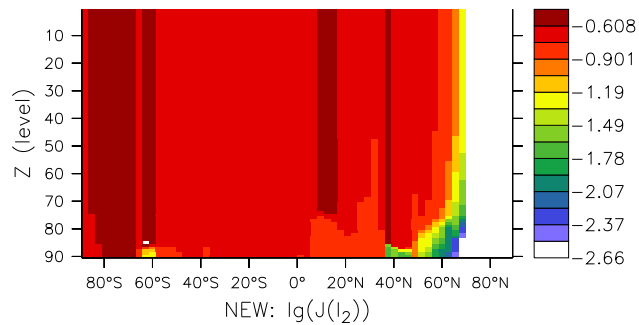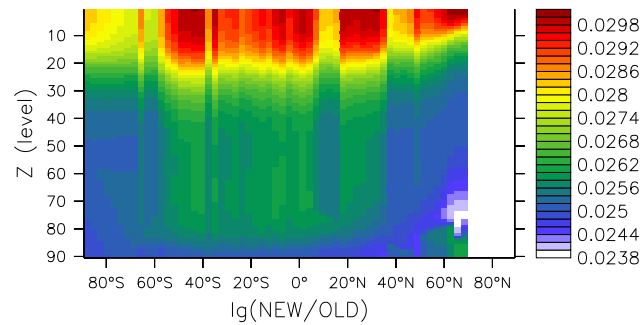

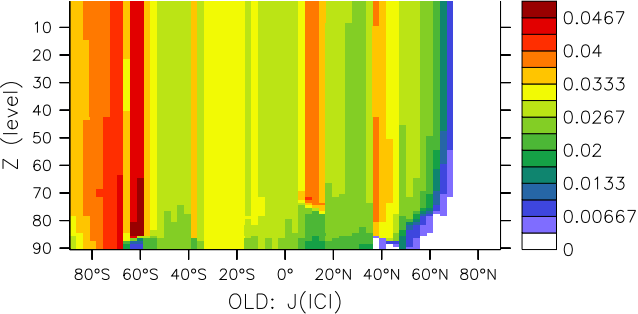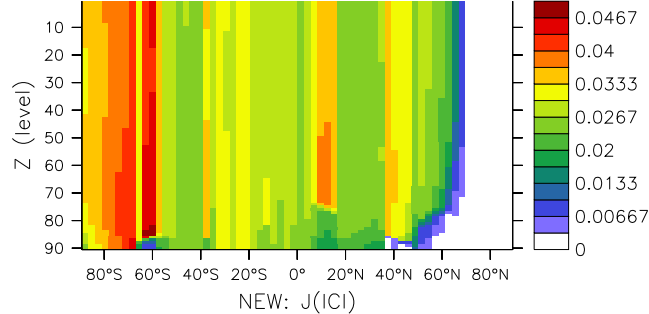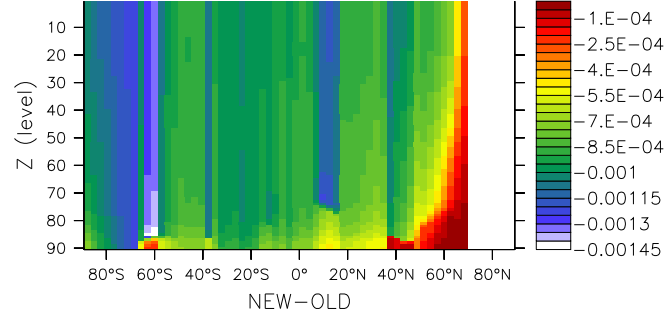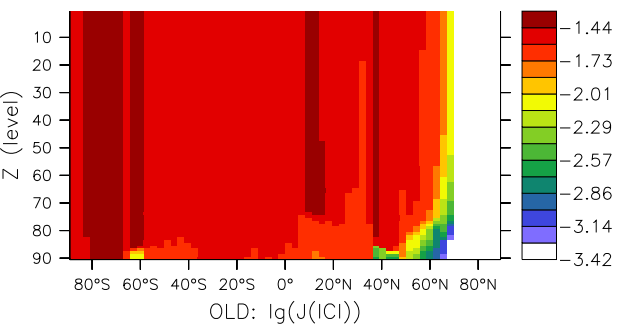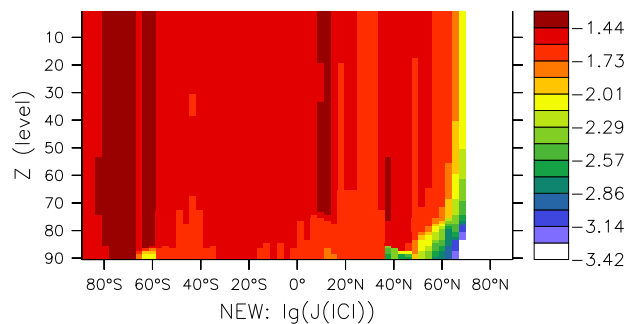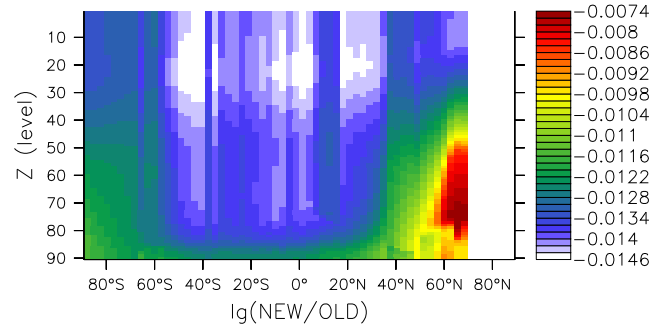

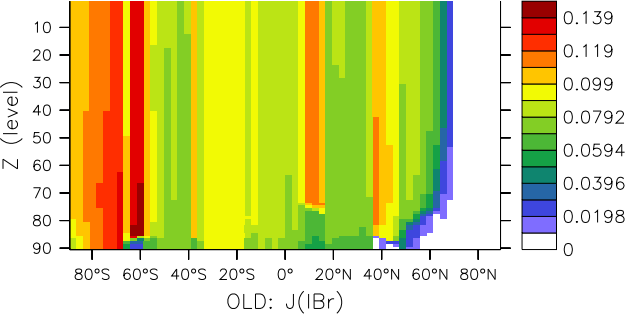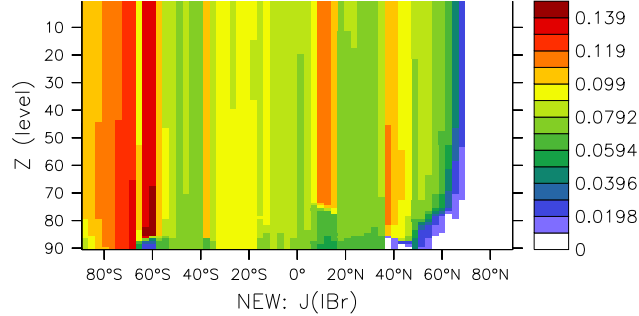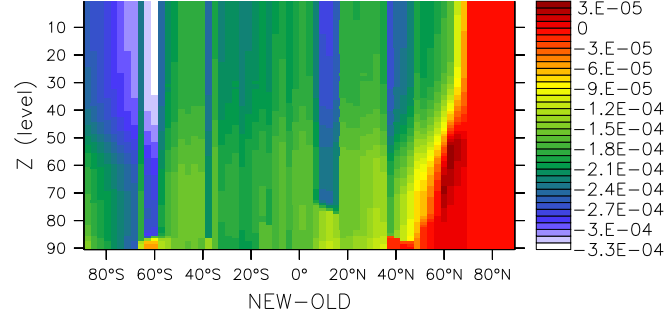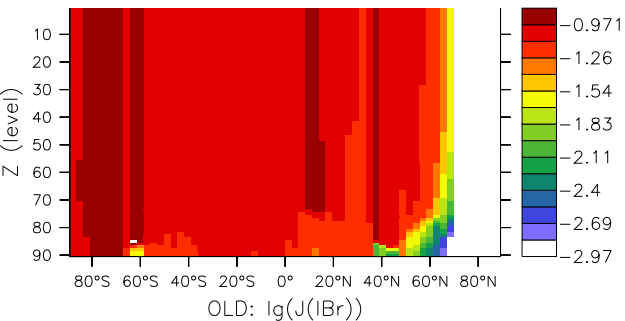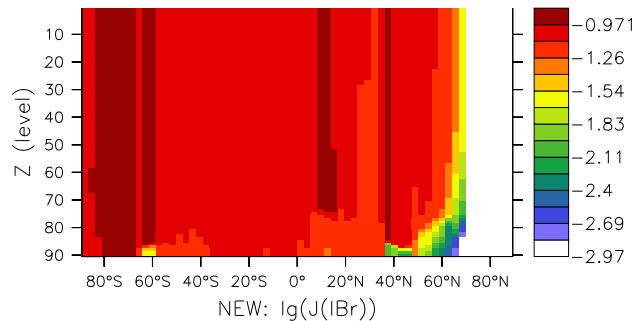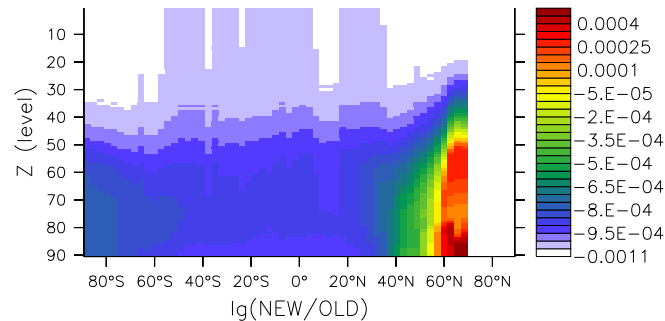



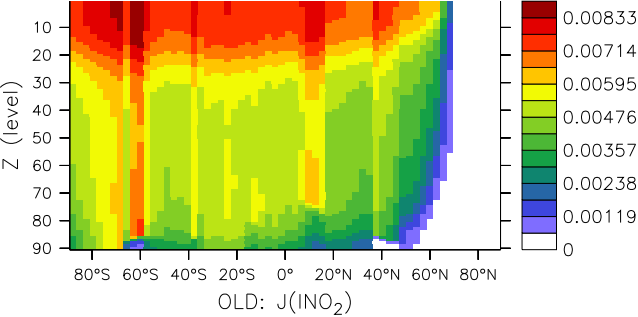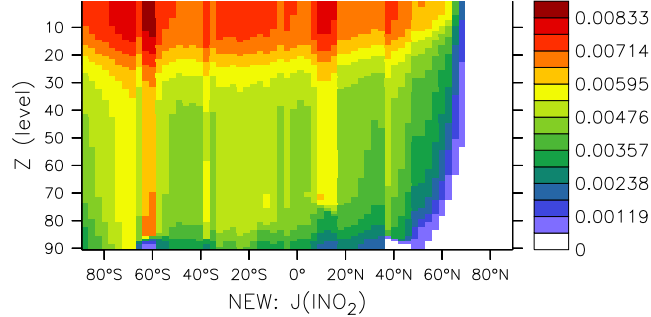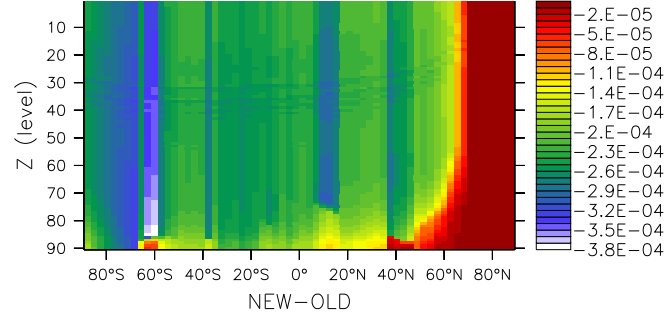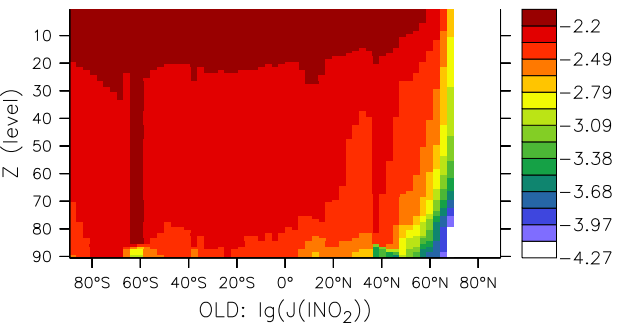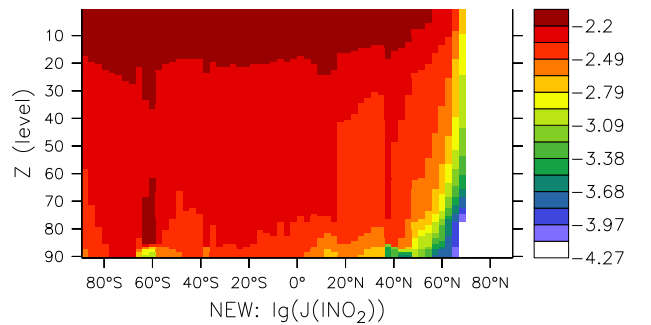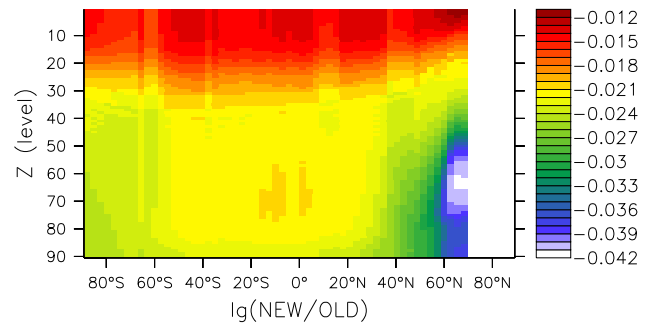

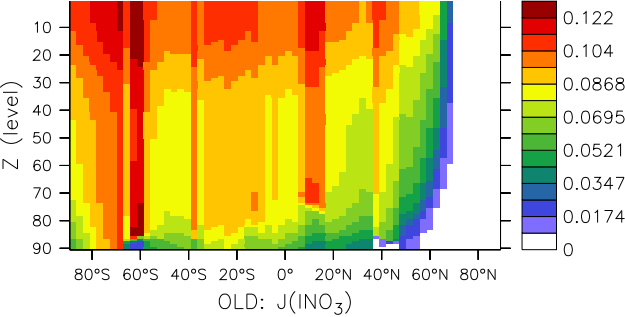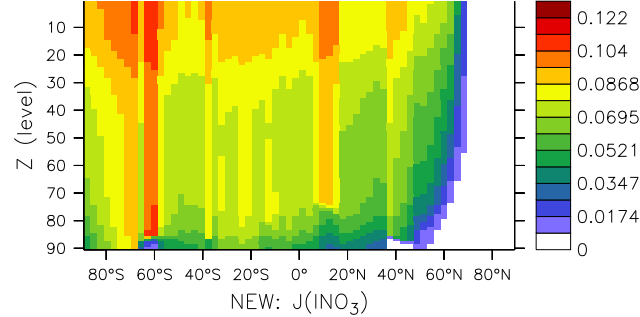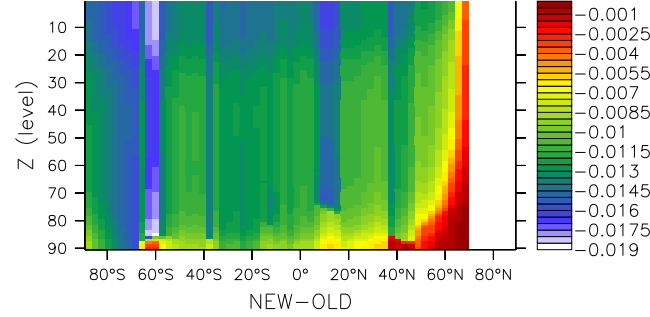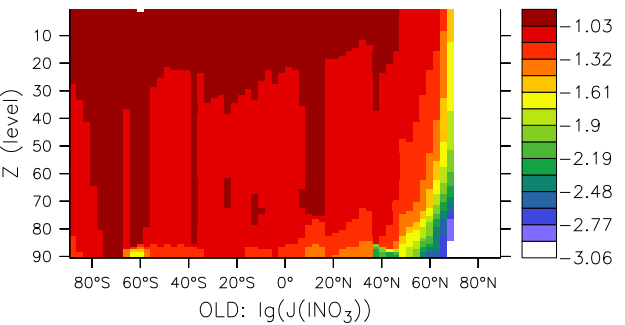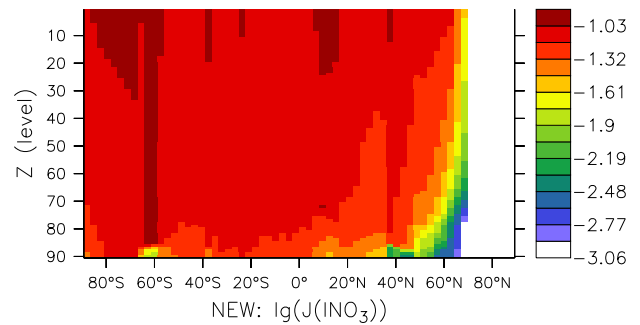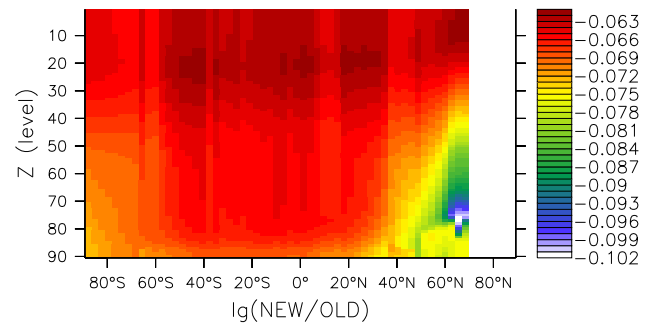

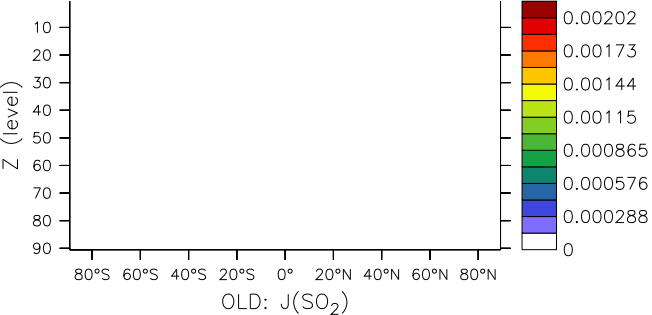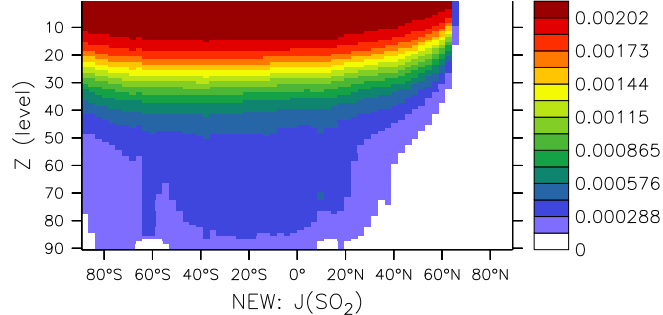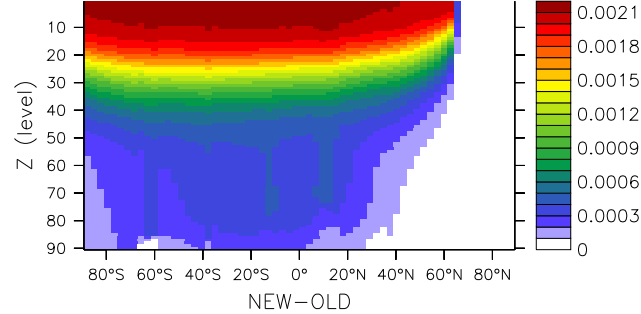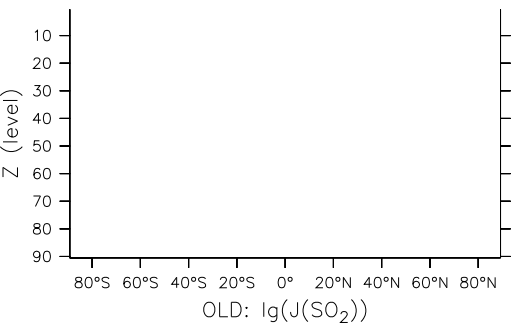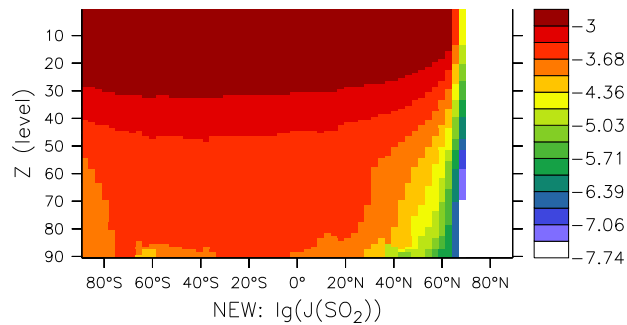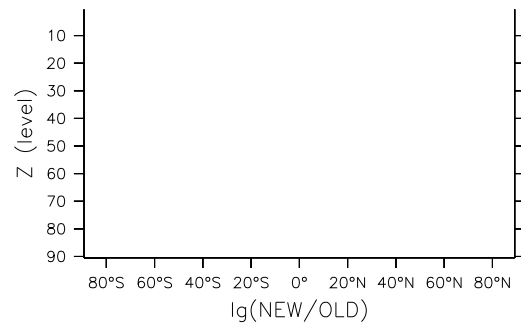

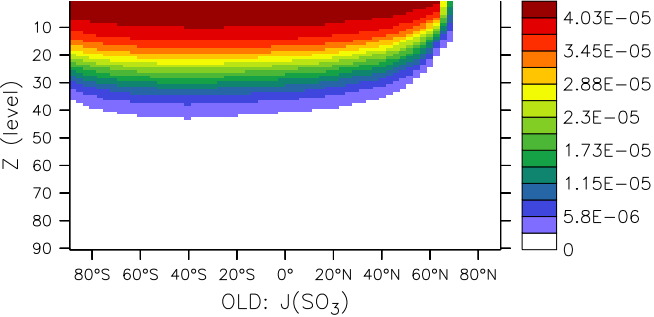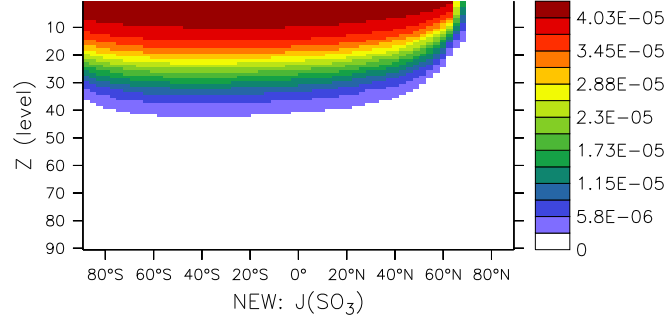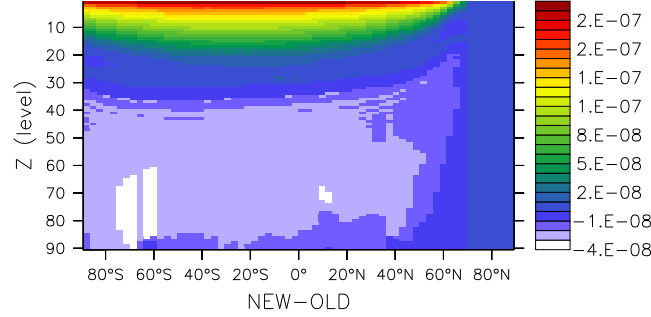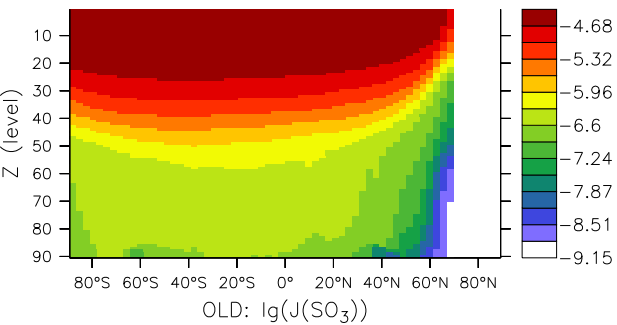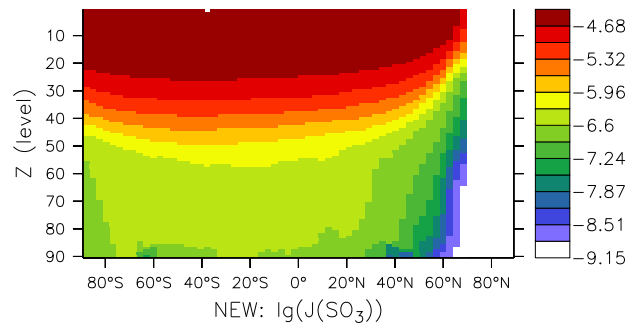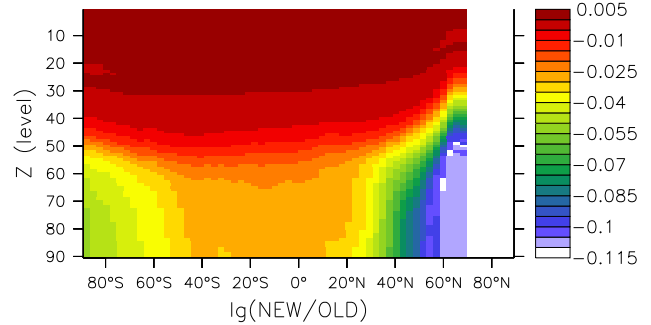

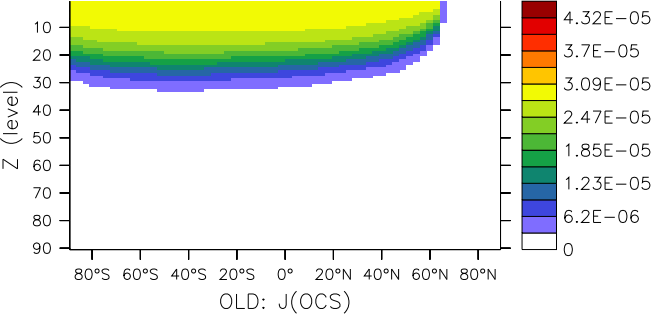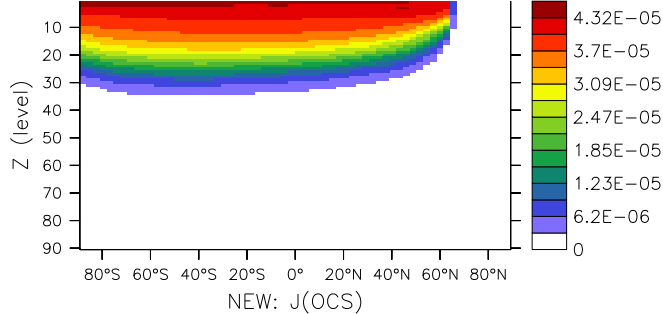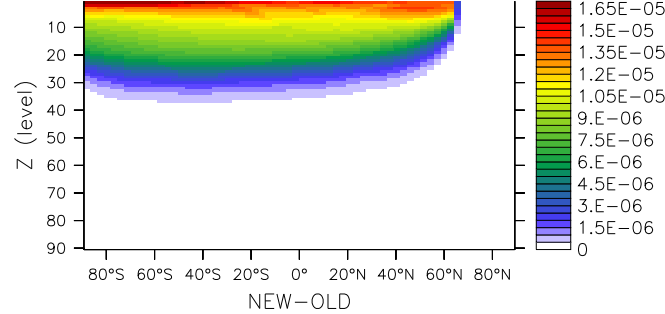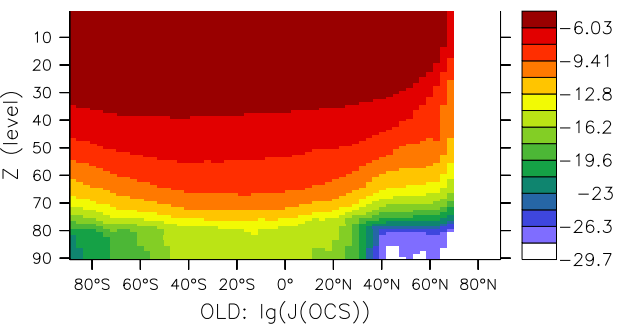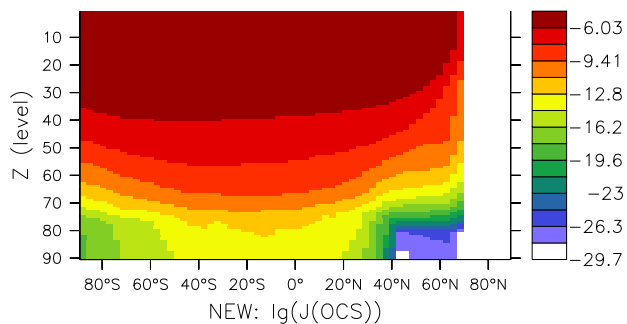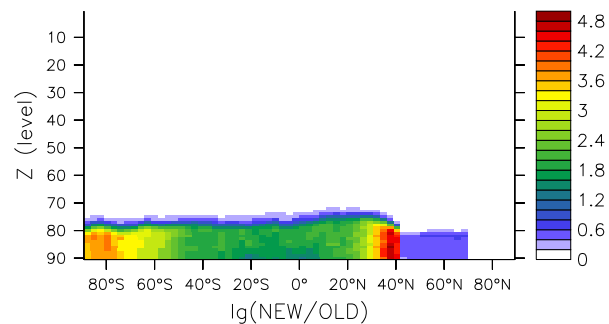

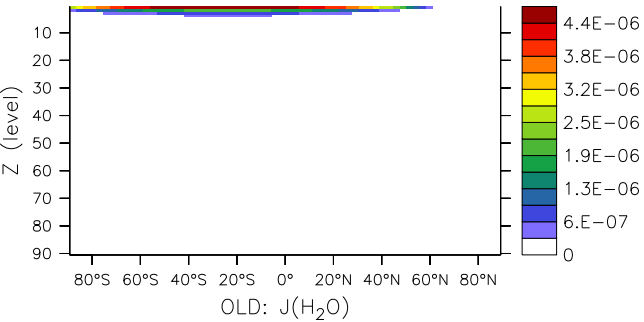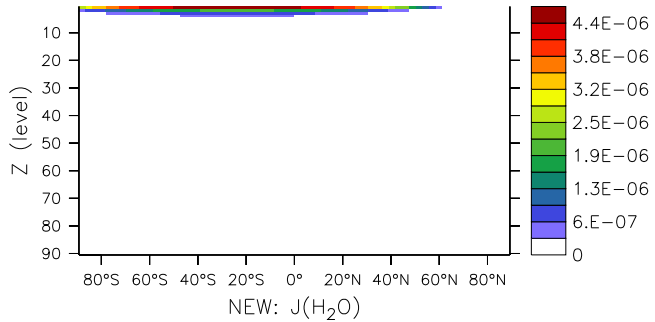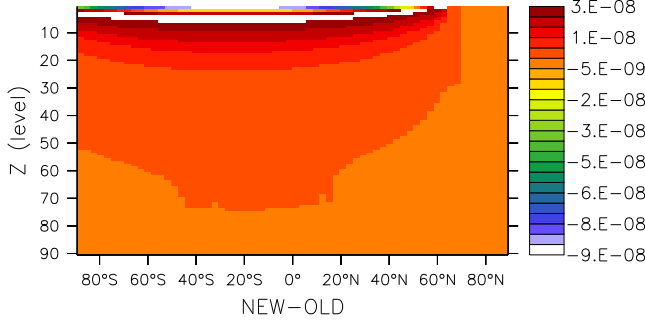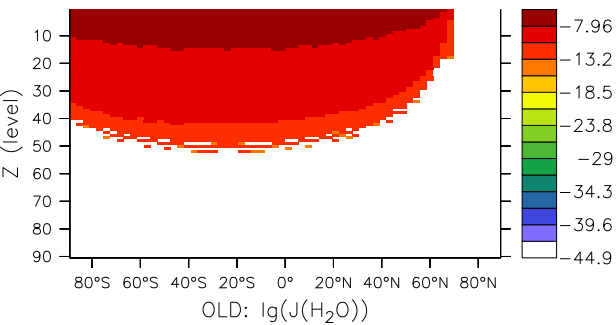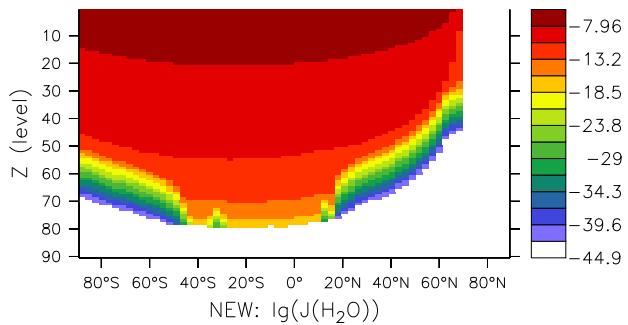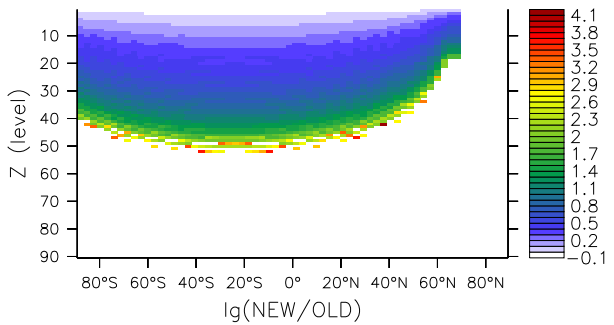

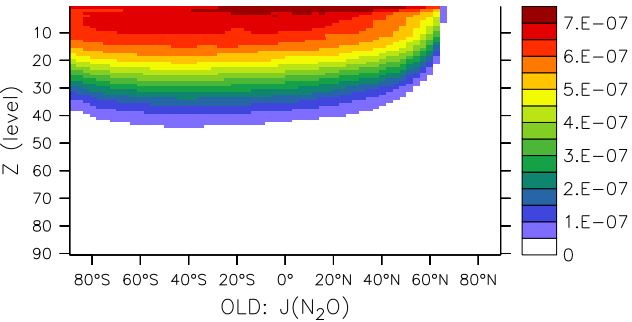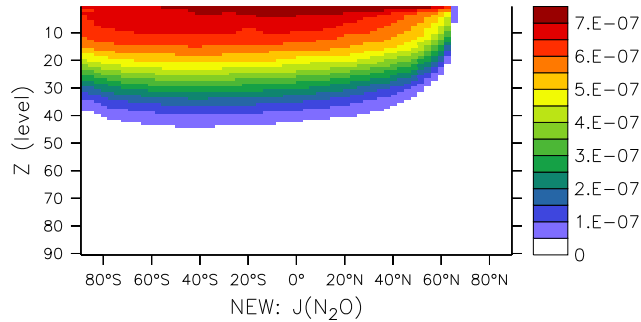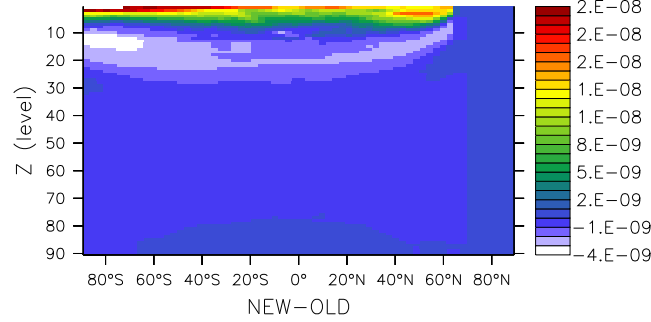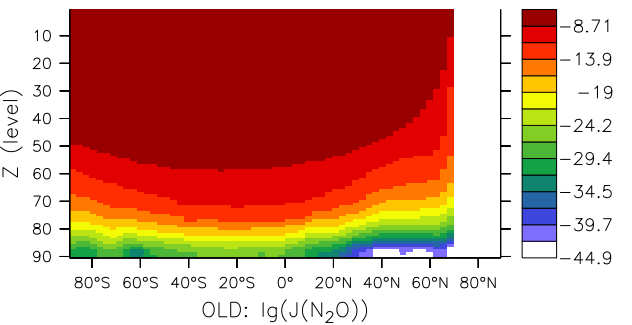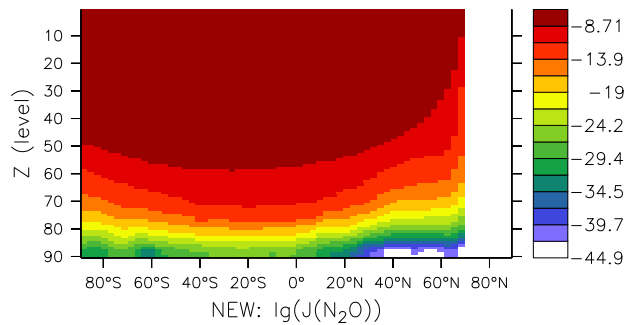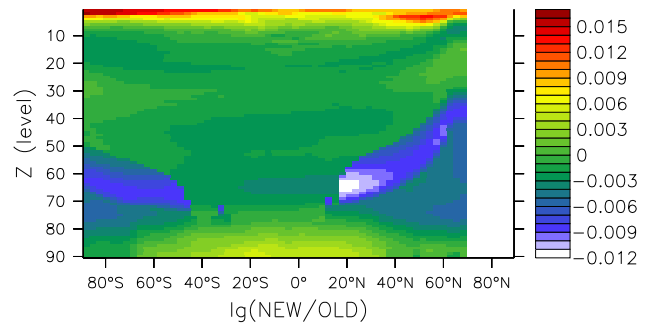

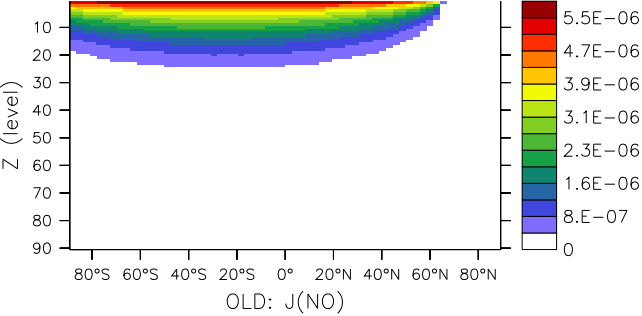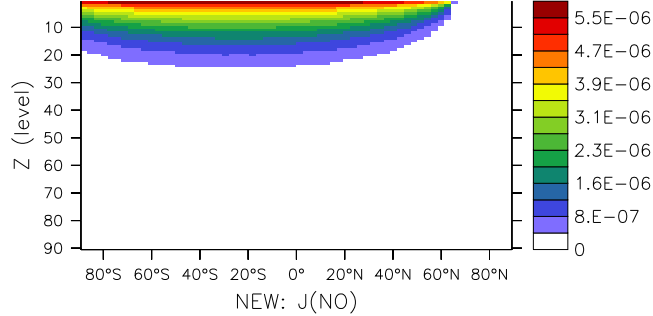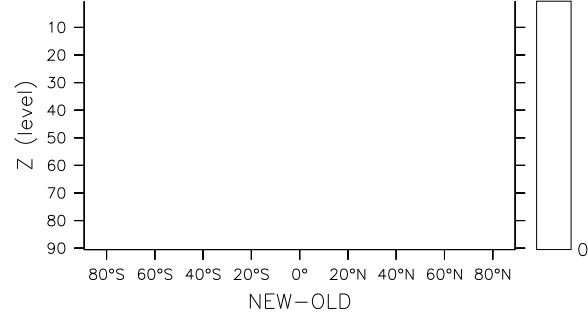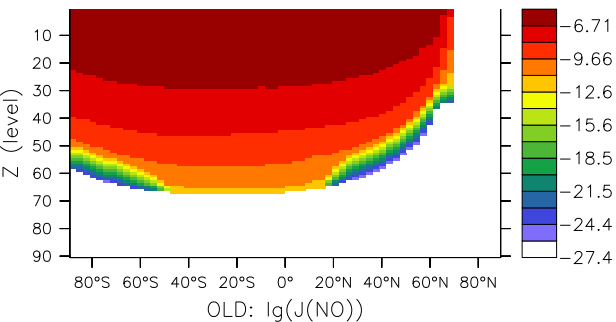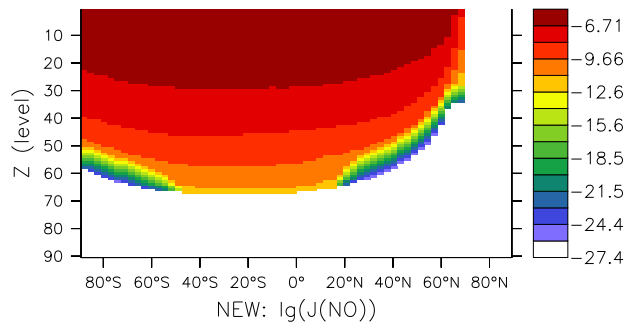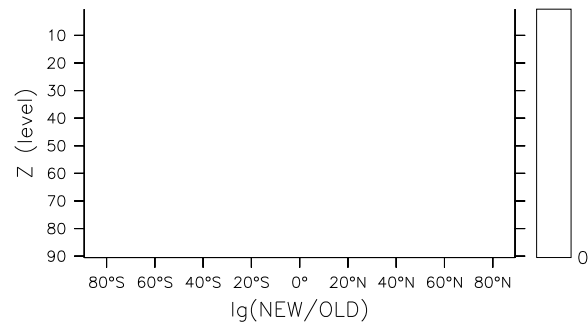



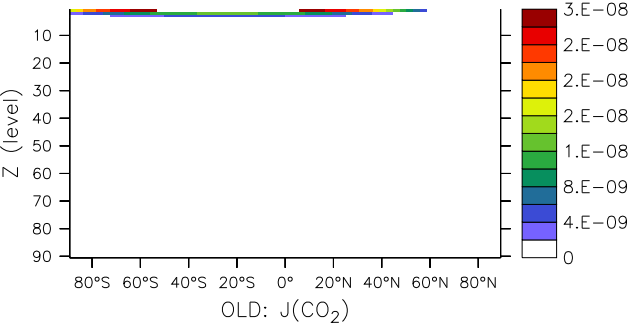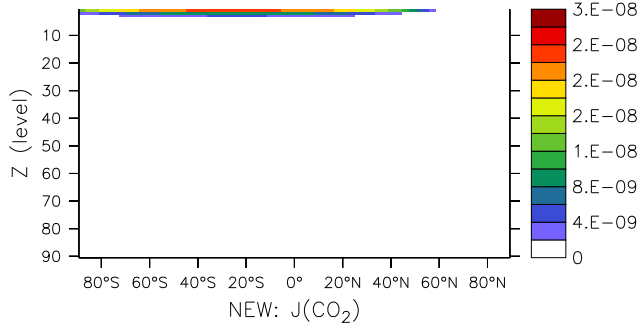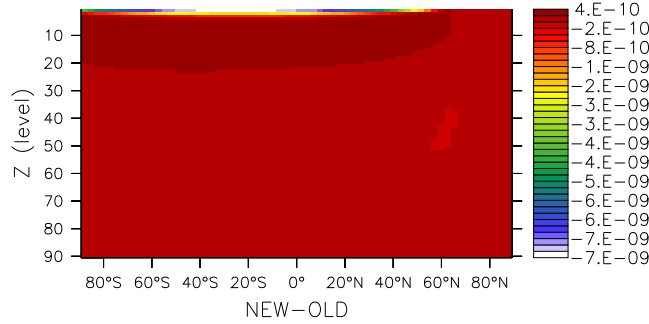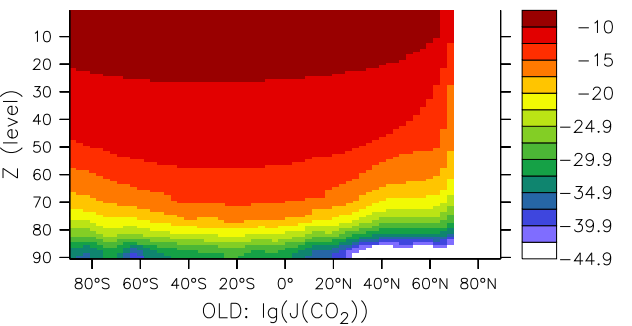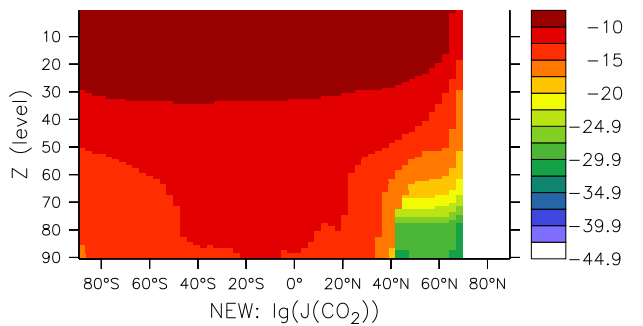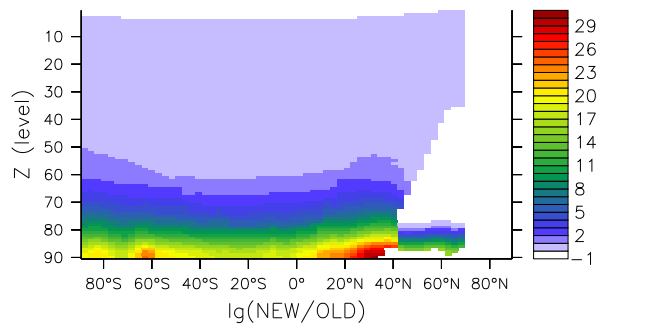

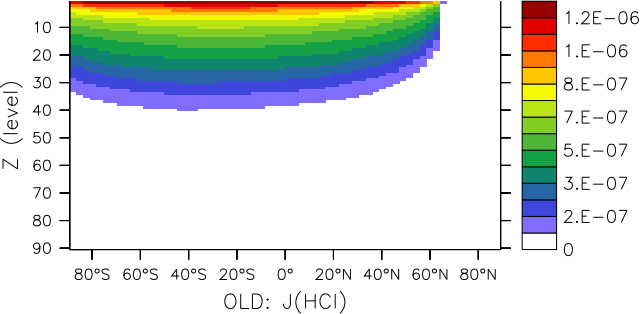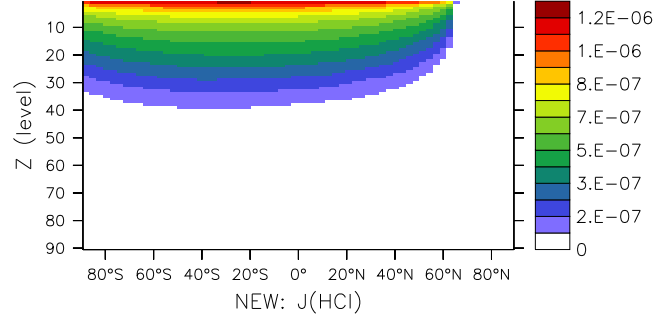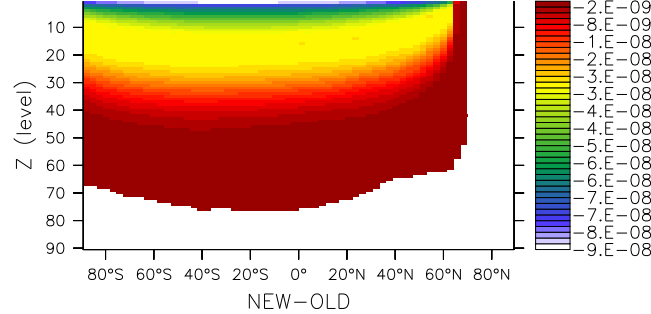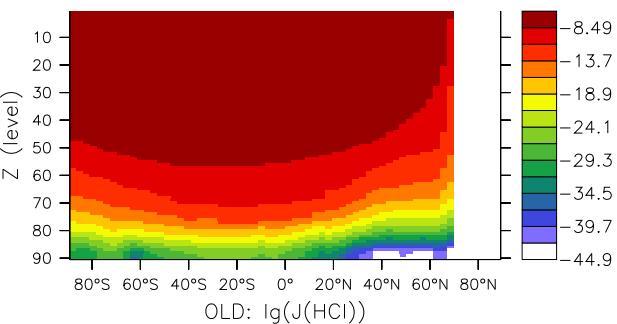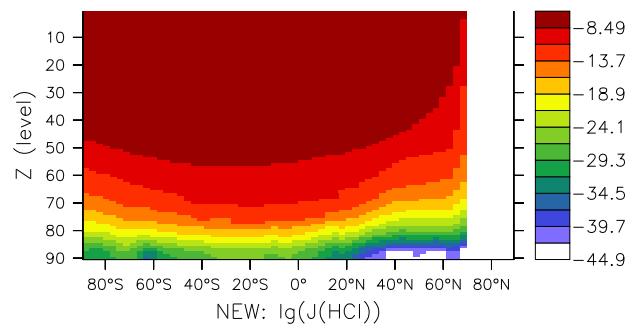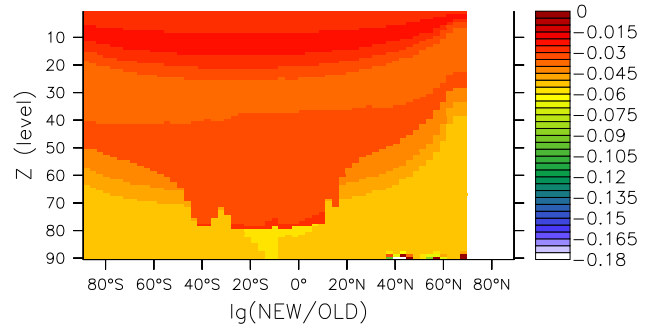

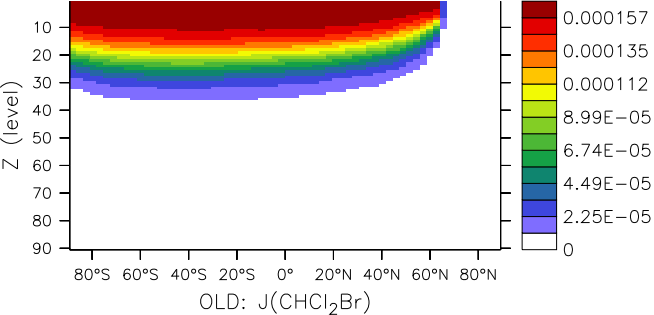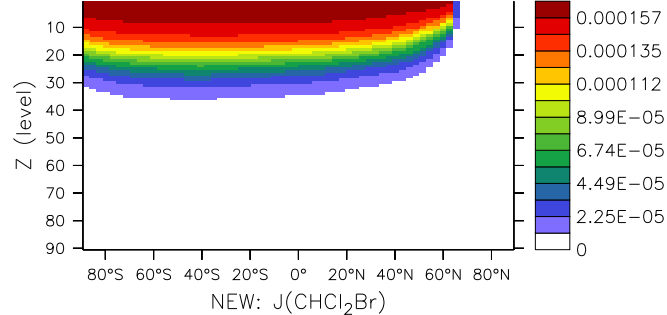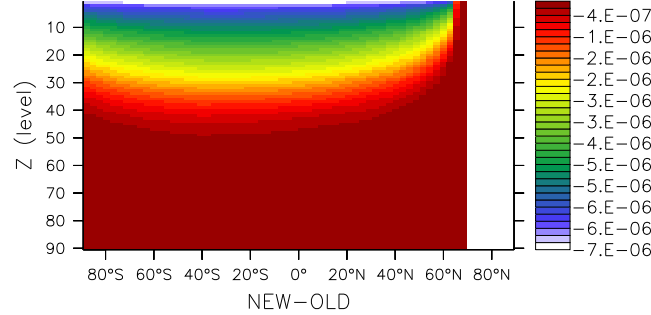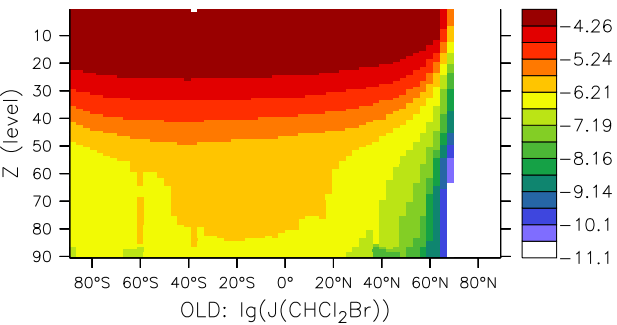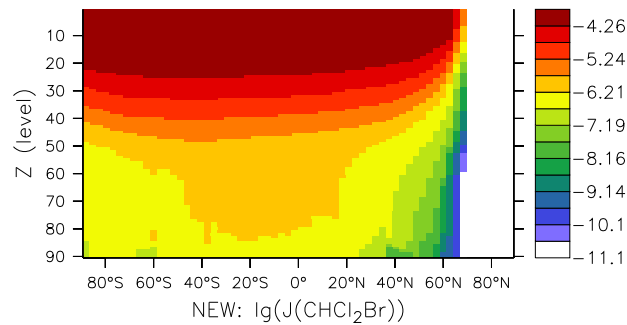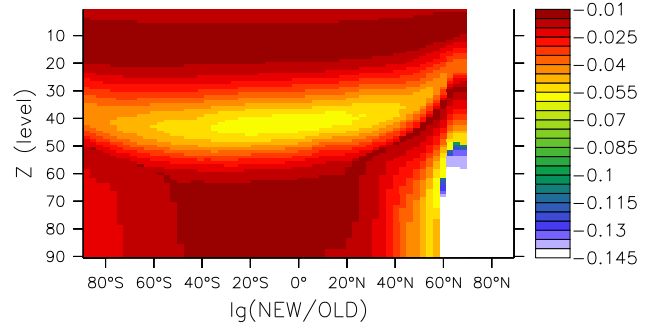

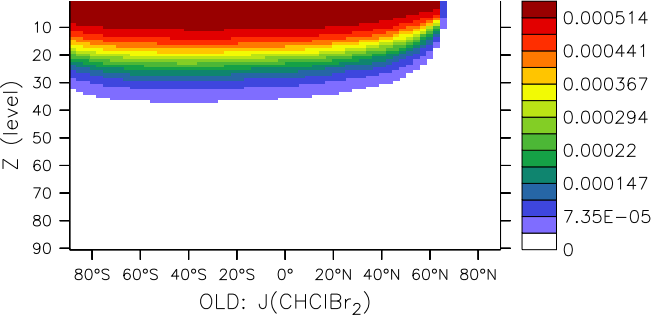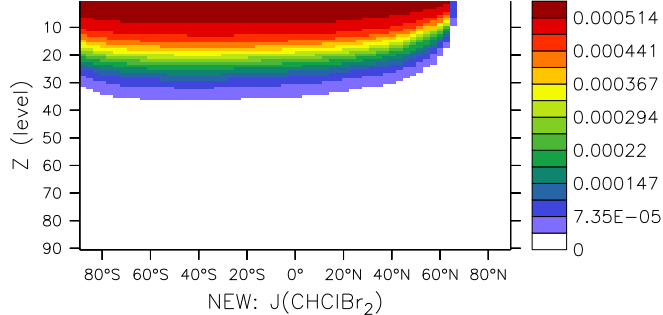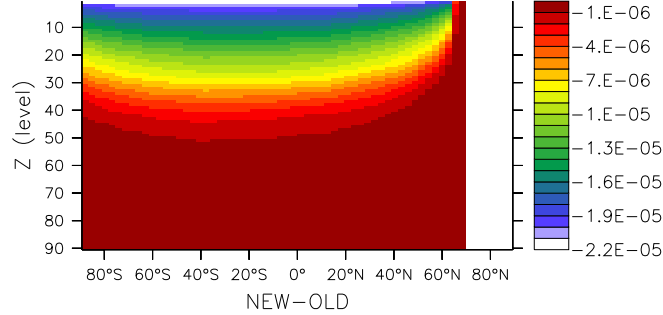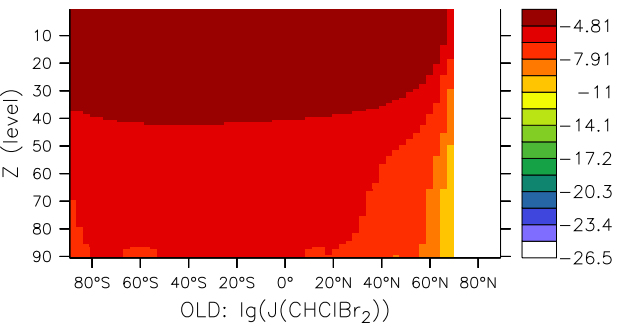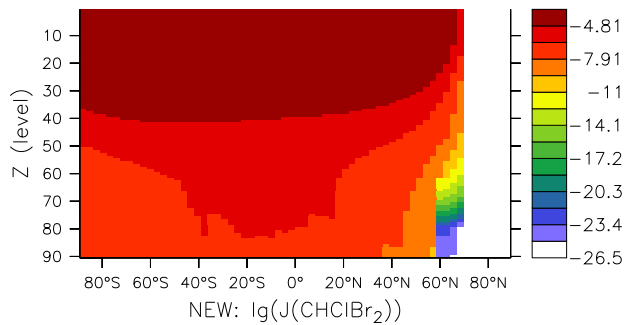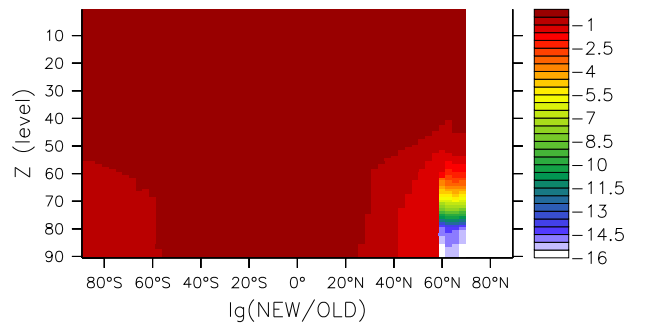

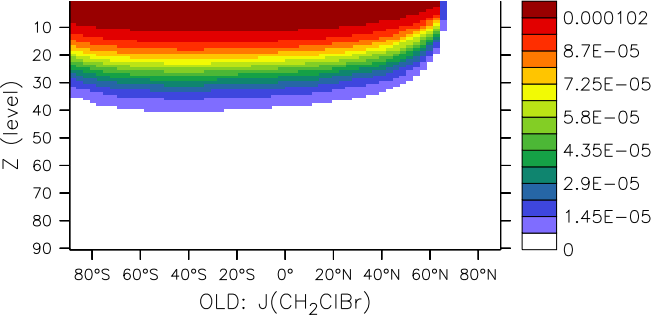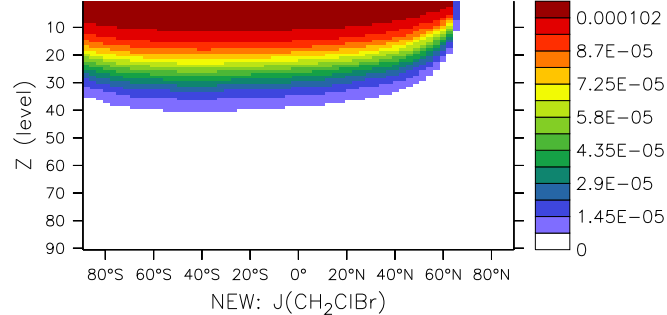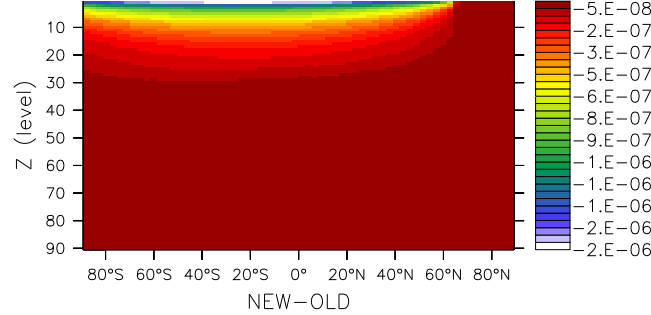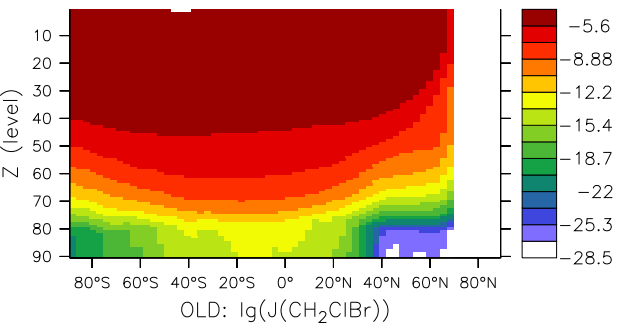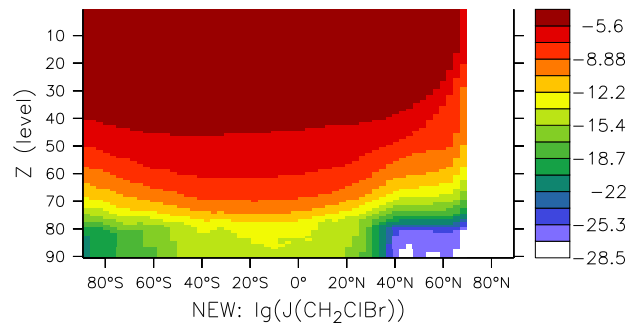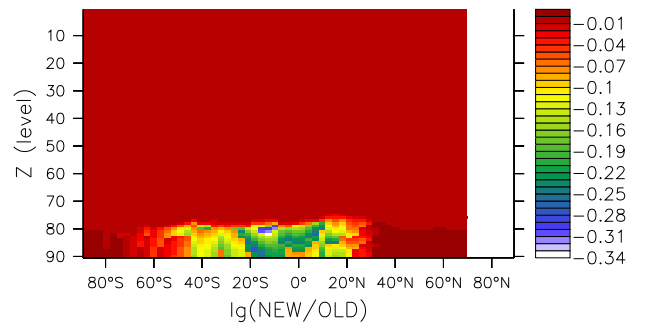

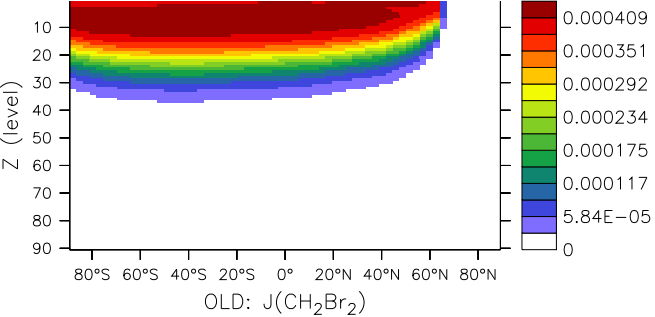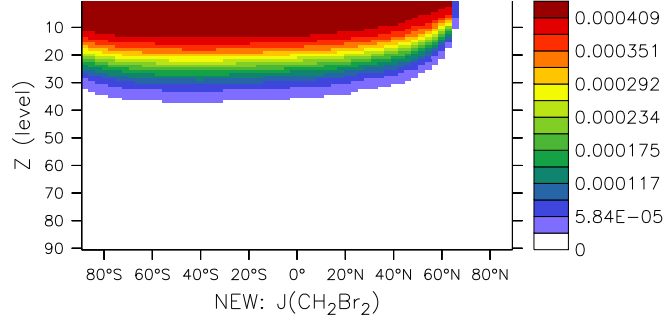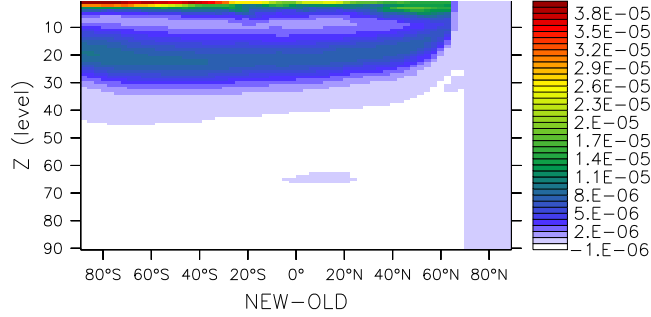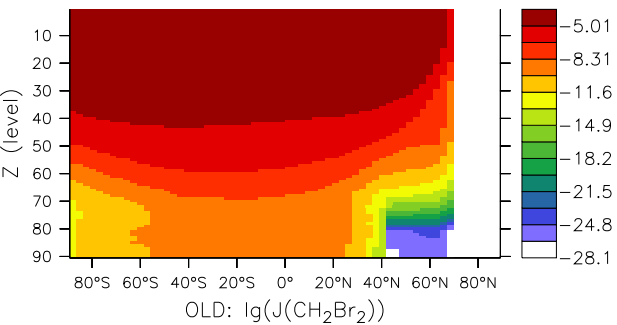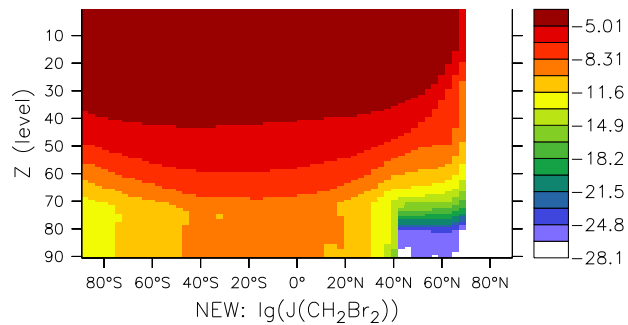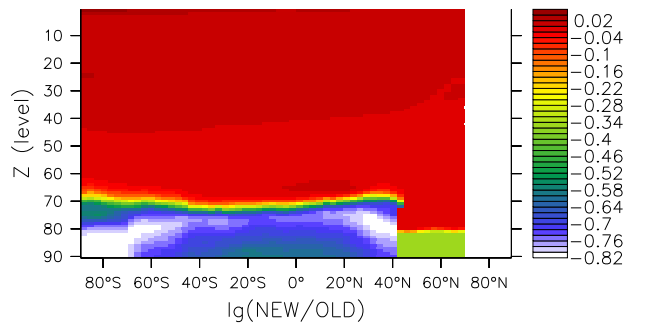

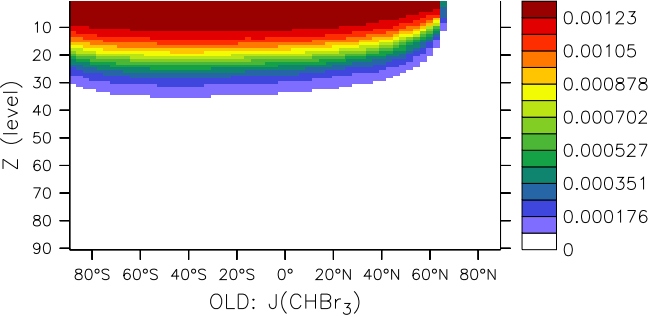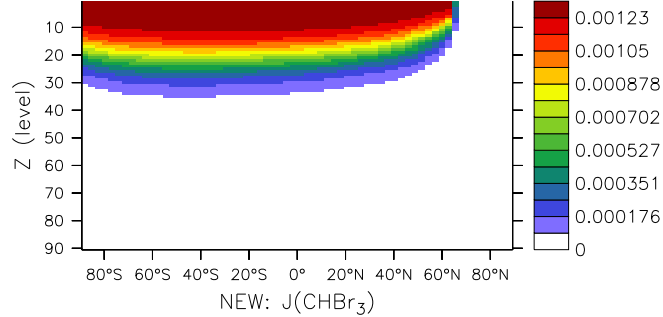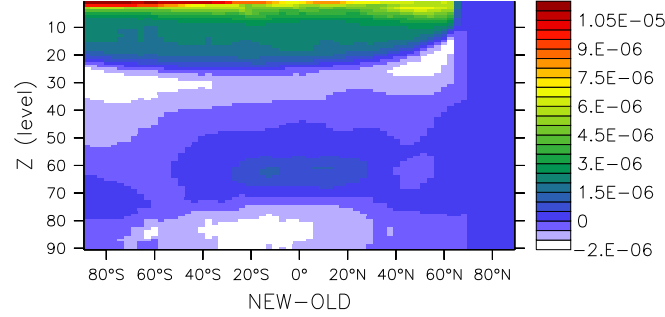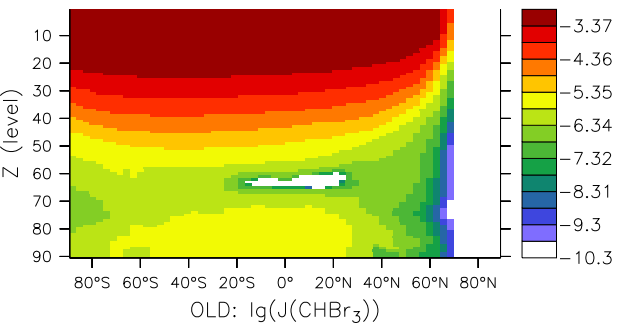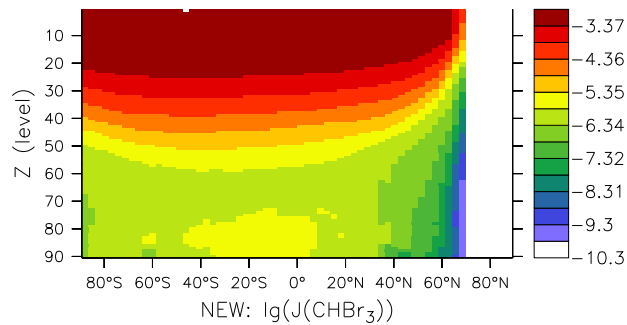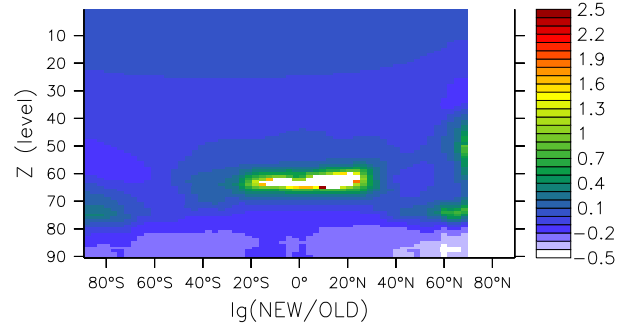

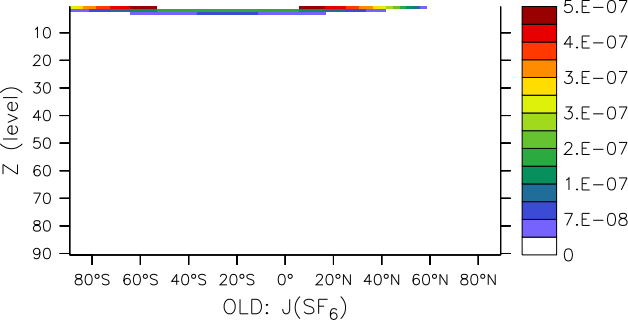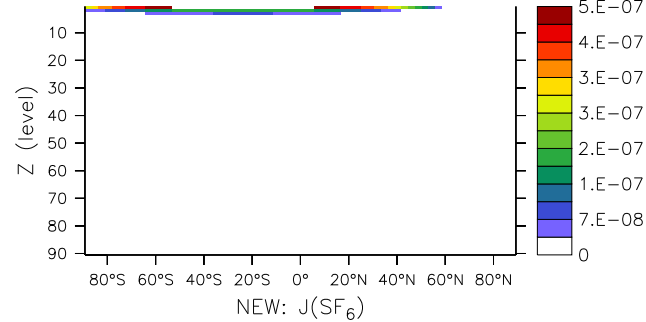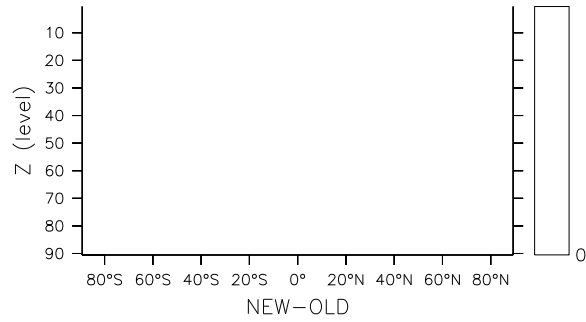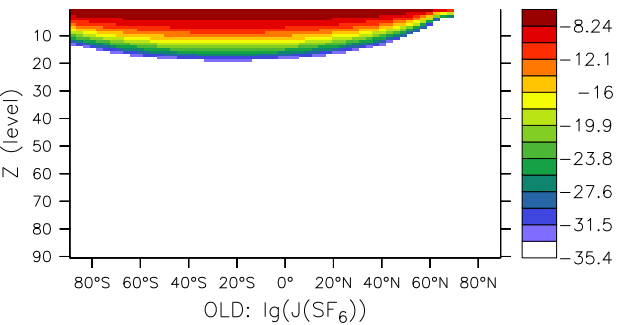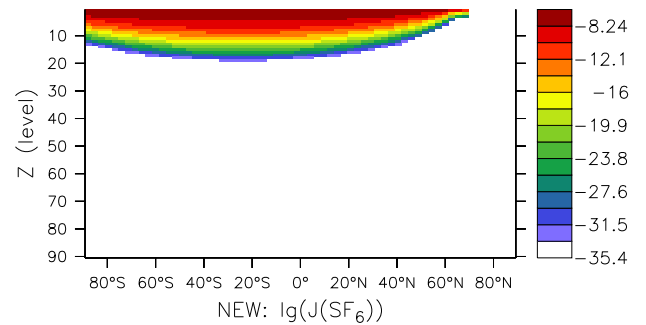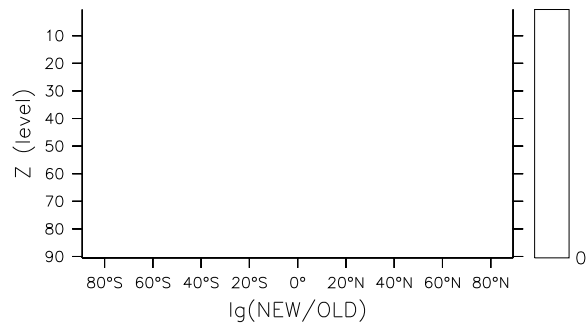



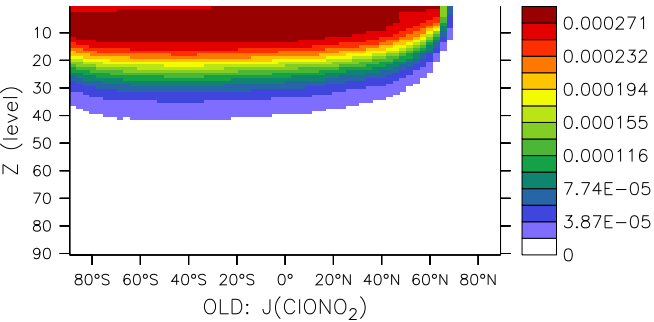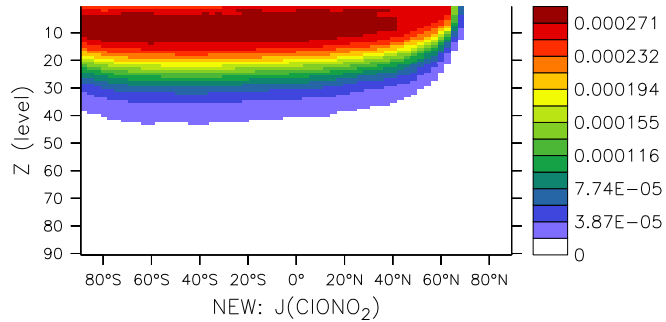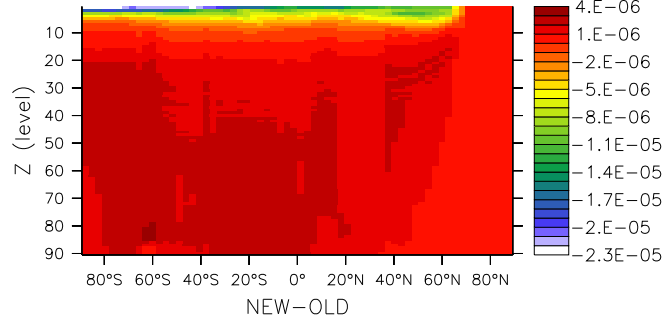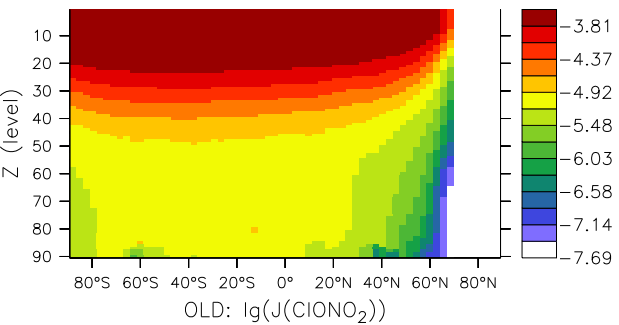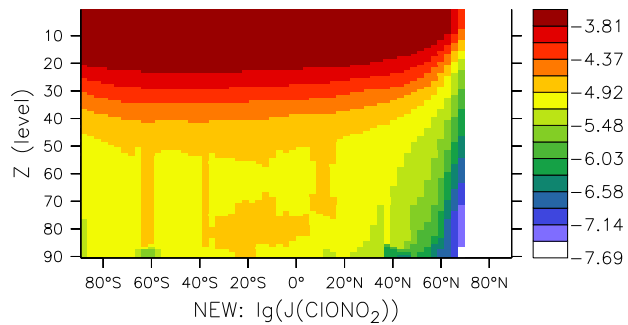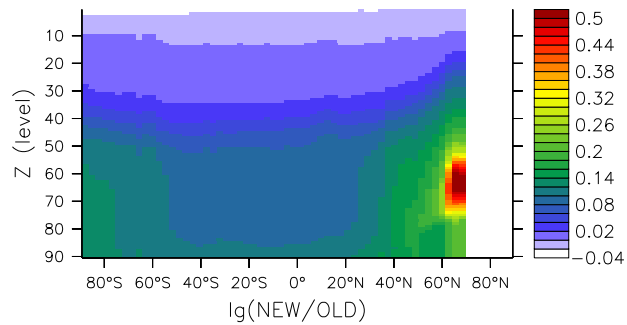

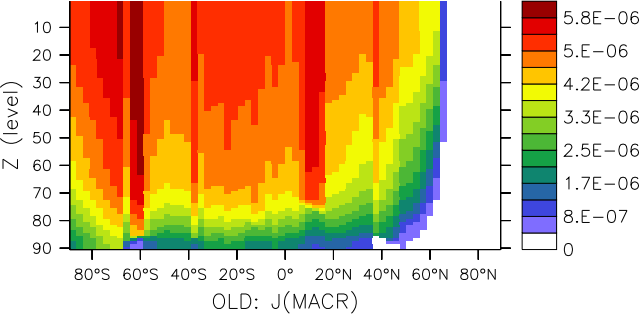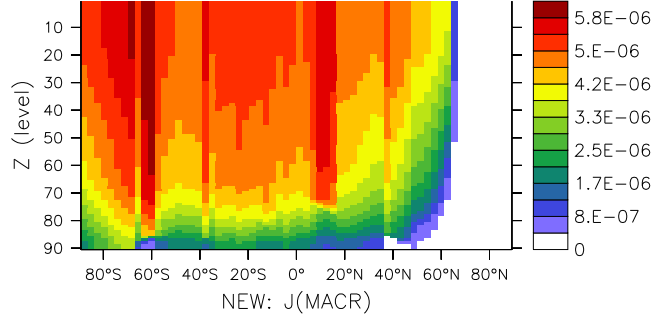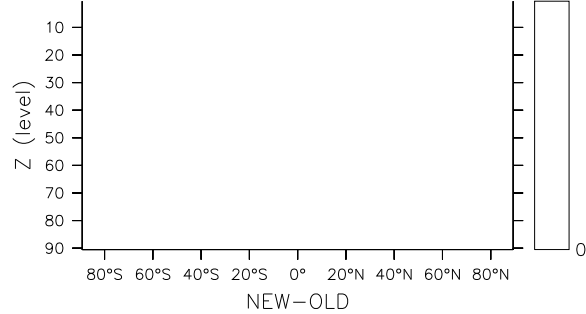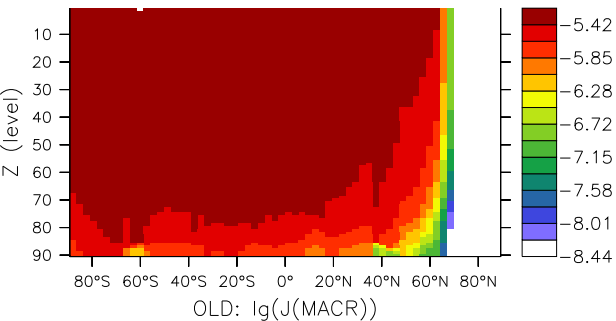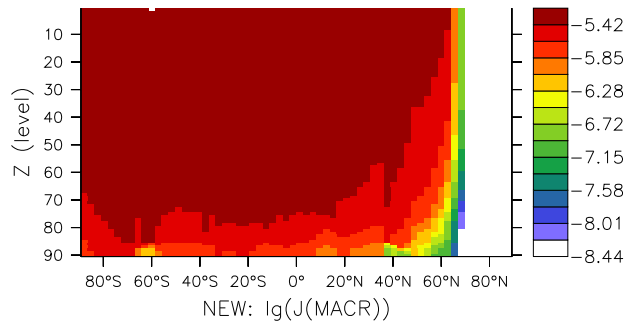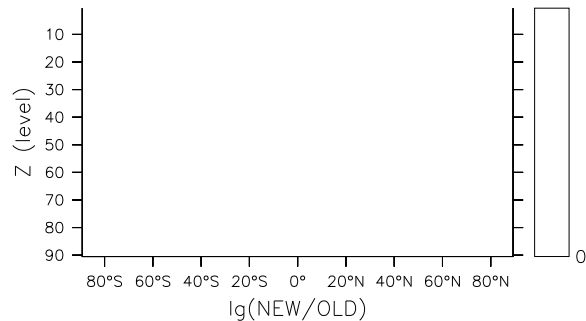

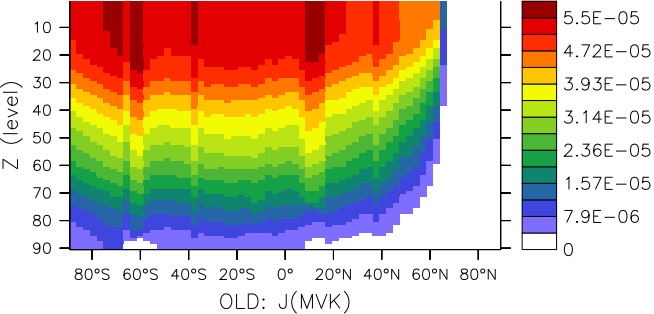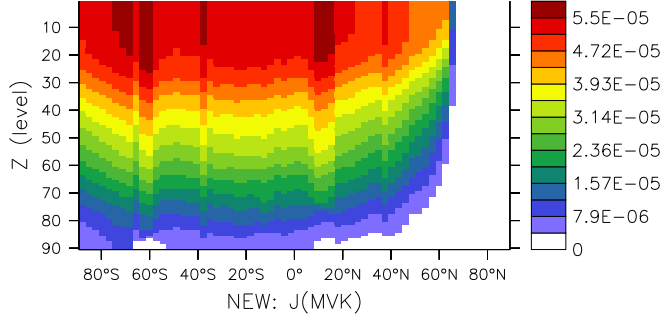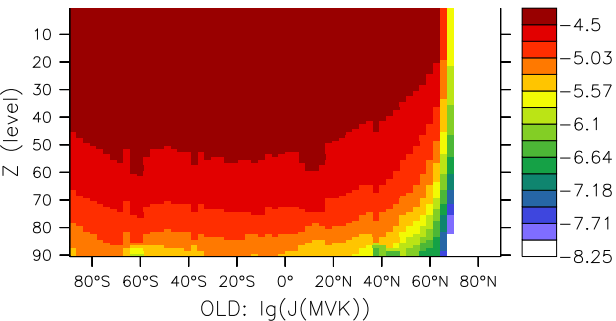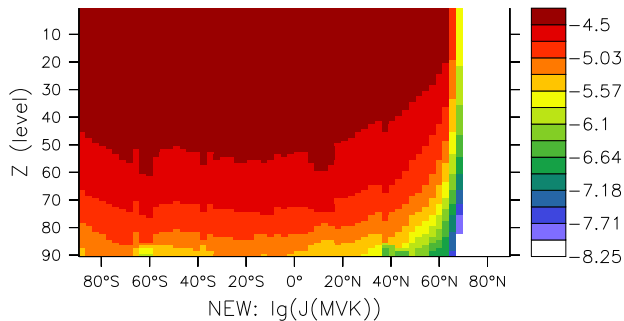

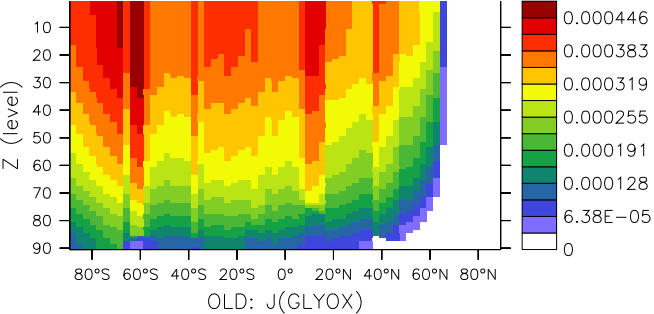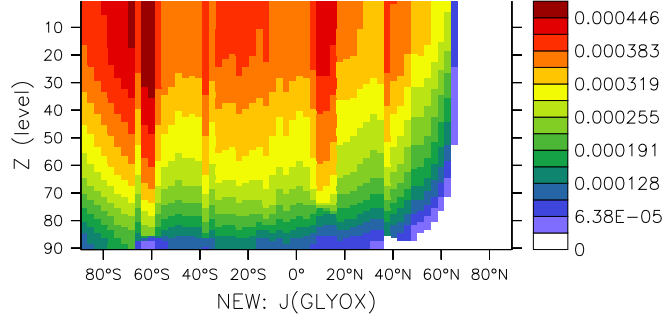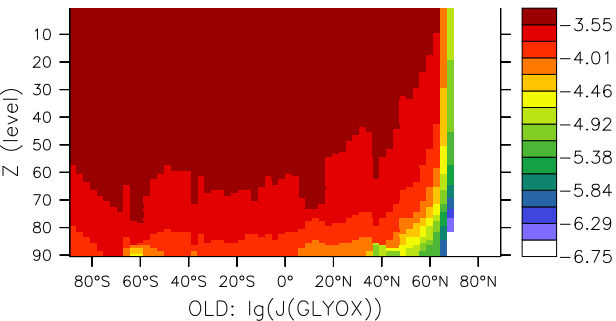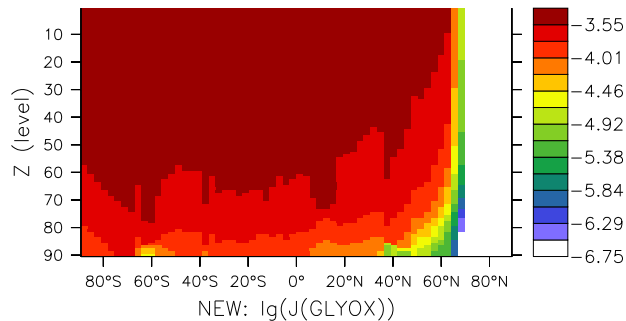

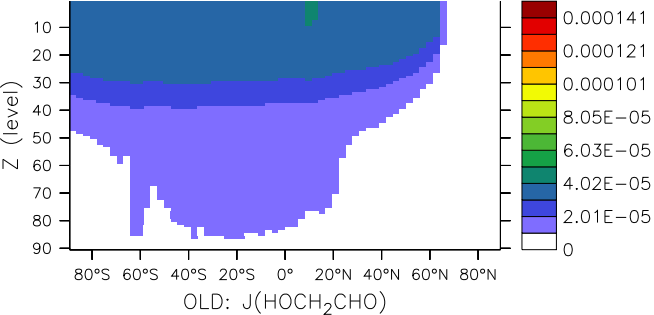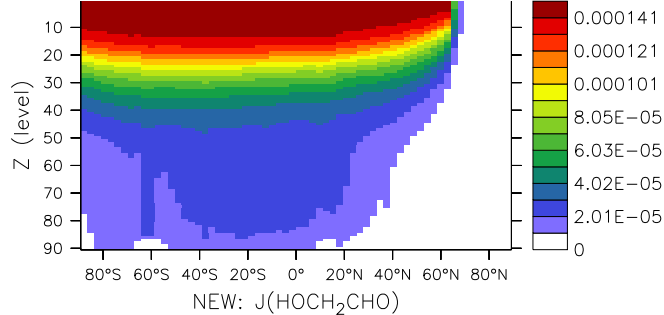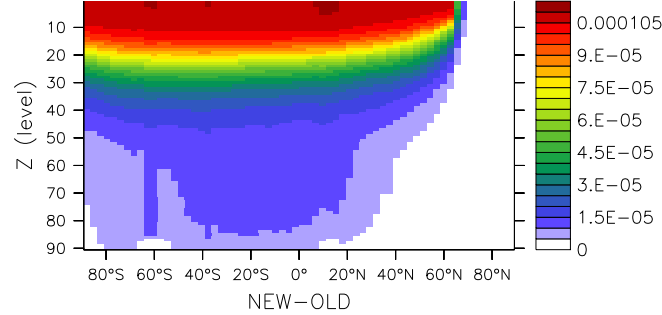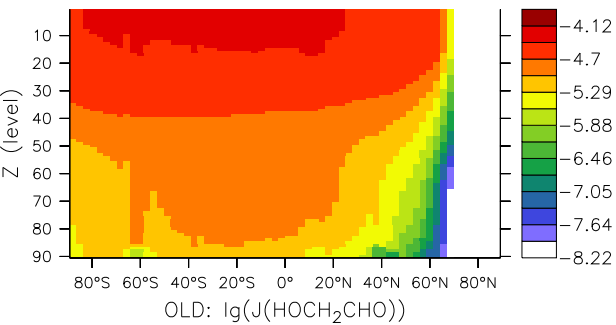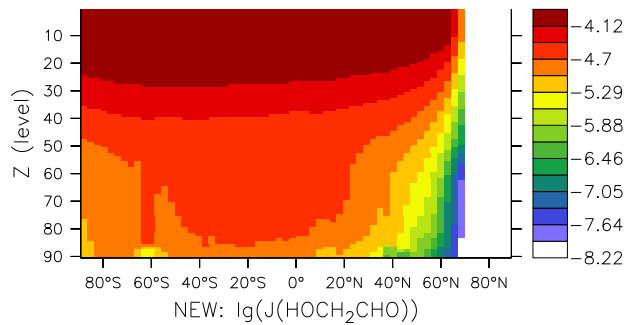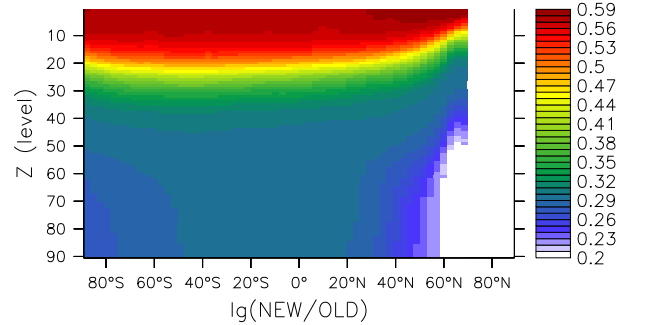

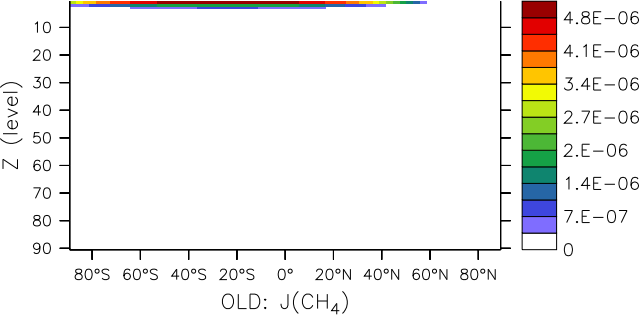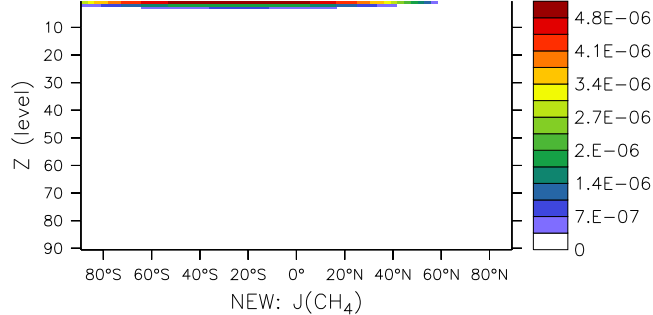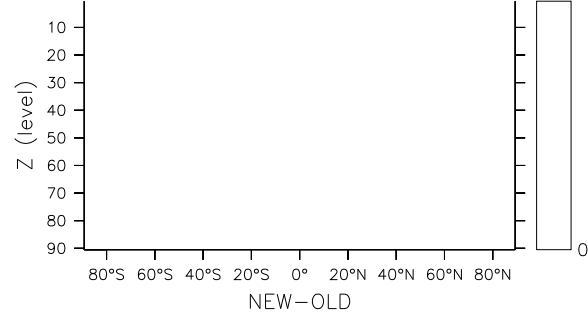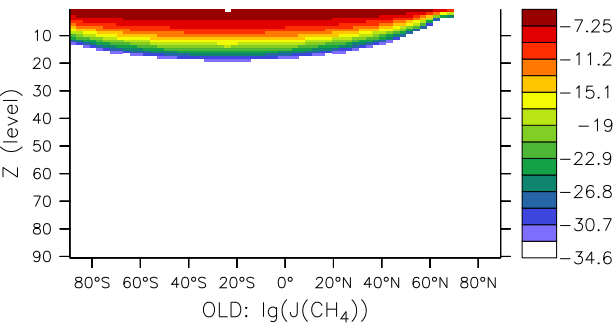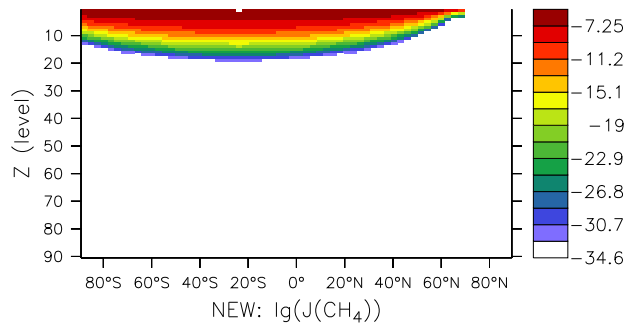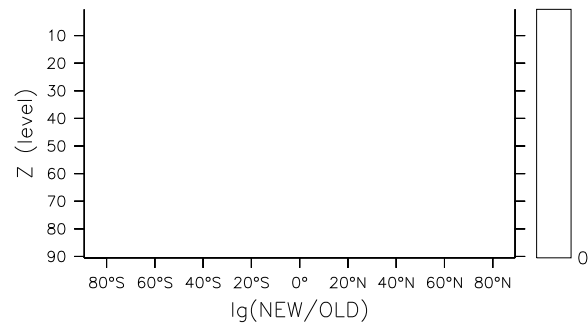

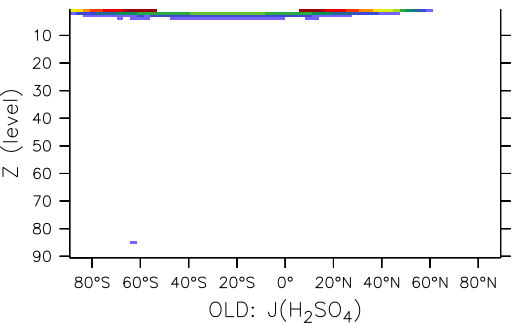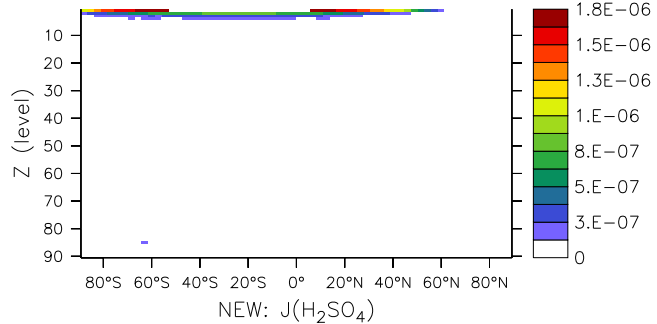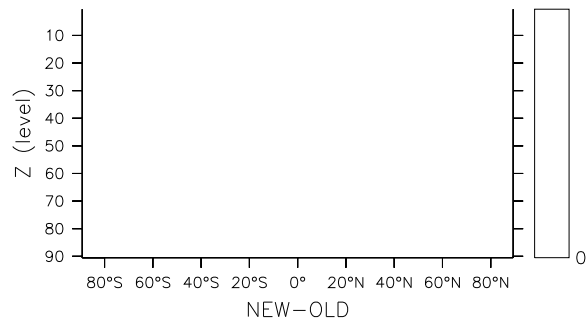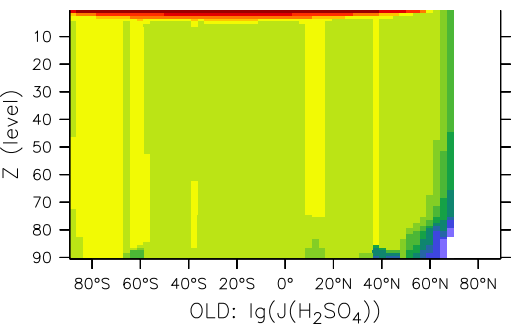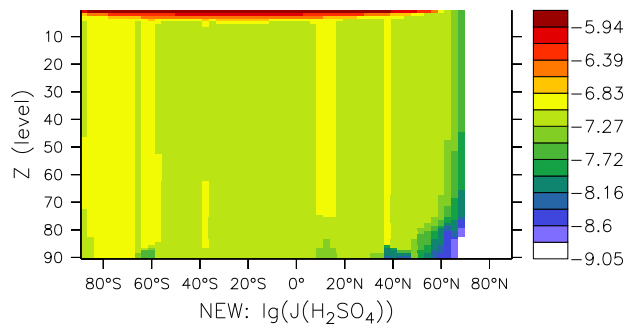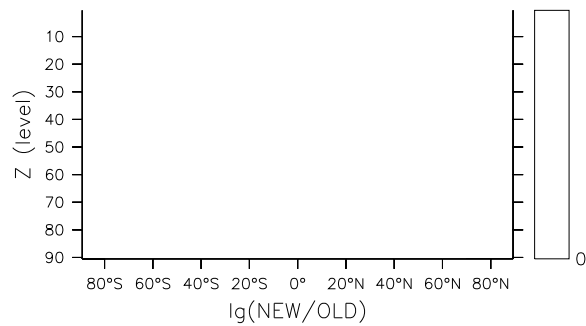

Supplement: Supplementary file 8 [file gmd-7-2653-2014-supplement.zip]
